# Supplementary material for: Functional and pharmacological analyses of visual habituation learning in larval zebrafish
Source: bioRxiv preprint, doi:10.1101/2022.06.17.496451, version 3 (2023-05-03)
Supplement: Supplemental Data 1 [file 496451_file02.csv]

	index	Rack Number	Plate Location	col	row	Date Screened	Plate	ROI Start	ROI End	Other ROIs	Behav Plate Wells	Vehicle Wells	Vehicle ROIs	Product Name	Catalog No.	Class	Pathway	Targets	M.w.	CAS Number	Form	Information	Smiles	Max Solubility in DMSO (mM)	URL	Control Name
0	1200	L2000-16	a2	2	1	20170412	0	215	220		K15:20	A1:16, B:O7, B:O14, N1:6, O1:6	[1:20, 34:20:294, 27:20:287, 261:266, 281:286]	IU1	S7134	Protease	Proteases	DUB	300.37	314245-33-5	free base	IU1 is a cell-permeable, reversible and selective proteasome inhibitor of human USP14 with IC50 of 4.7 μ M, 25-fold selective to IsoT.	C1=C(C=CC(=C1)N2C(=C(C=C2C)C(CN3CCCC3)=O)C)F	199	http://www.selleckchem.com/products/iu1.html
1	1201	L2000-16	a3	3	1	20170412	0	195	200		J15:20	A1:16, B:O7, B:O14, N1:6, O1:6	[1:20, 34:20:294, 27:20:287, 261:266, 281:286]	NMS-873	S7285	Protease	Ubiquitin	p97	520.67	1418013-75-8	free base	NMS-873 is an allosteric and specific p97 inhibitor with IC50 of 30 nM.	C1=CC=NC=C1N2C(=NN=C2COC3=CC=C(C(=C3)C)C4=CC=C(C=C4)S(=O)(=O)C)SC5CCCC5	192	http://www.selleckchem.com/products/nms-873.html
2	1202	L2000-16	a4	4	1	20170412	0	175	180		I15:20	A1:16, B:O7, B:O14, N1:6, O1:6	[1:20, 34:20:294, 27:20:287, 261:266, 281:286]	Artemisinin	S1282	microbiology	Others		282.33	63968-64-9	free base	Artemisinin is a drug used to treat multi-drug resistant strains of falciparum malaria.	[C@@]12(O[C@@]3([C@]4([C@@](CC1)([C@H](CC[C@]4([C@@H](C(O3)=O)C)[H])C)[H])OO2)[H])C	201	http://www.selleckchem.com/products/Artemisinin.html
3	1203	L2000-16	a5	5	1	20170412	0	155	160		H15:20	A1:16, B:O7, B:O14, N1:6, O1:6	[1:20, 34:20:294, 27:20:287, 261:266, 281:286]	Meropenem	S1381	microbiology	Others	Others	383.46	96036-03-2	free base	Meropenem is an ultra-broad spectrum injectable antibiotic.	N12C(C(C1=O)C(C)O)C(C(=C2C(O)=O)SC3CC(NC3)C(=O)N(C)C)C	200	http://www.selleckchem.com/products/Meropenem.html
4	1204	L2000-16	a6	6	1	20170412	0	135	140		G15:20	A1:16, B:O7, B:O14, N1:6, O1:6	[1:20, 34:20:294, 27:20:287, 261:266, 281:286]	Marbofloxacin	S1464	microbiology	Others	Others	362.36	115550-35-1	free base	Marbofloxacin is a potent antibiotic inhibiting bacterial DNA replication.	C1(=C(C2=C3C(=C1)C(C(=CN3N(CO2)C)C(O)=O)=O)N4CCN(CC4)C)F	10	http://www.selleckchem.com/products/Marbofloxacin.html
5	1205	L2000-16	a7	7	1	20170412	0	115	120		F15:20	A1:16, B:O7, B:O14, N1:6, O1:6	[1:20, 34:20:294, 27:20:287, 261:266, 281:286]	Sulfameter	S1618	microbiology	Others	Others	280.3	651-06-9	free base	Sulfameter(Bayrena) is a long-acting sulfonamide antibacterial.	C1(=CC=C(C=C1)S(NC2=NC=C(C=N2)OC)(=O)=O)N	199	http://www.selleckchem.com/products/Sulfameter(Bayrena).html
6	1206	L2000-16	a8	8	1	20170412	0	95	100		E15:20	A1:16, B:O7, B:O14, N1:6, O1:6	[1:20, 34:20:294, 27:20:287, 261:266, 281:286]	Amorolfine HCl	S1676	microbiology	Others	Others	353.97	78613-38-4	hydrochloride	Amorolfine hydrochloride is a antifungal reagent.	C1(=C(C=CC(=C1)CC(CN2C[C@@H](O[C@@H](C2)C)C)C)C(CC)(C)C).Cl	79	http://www.selleckchem.com/products/Amorolfine-Hydrochloride.html
7	1207	L2000-16	a9	9	1	20170412	0	75	80		D15:20	A1:16, B:O7, B:O14, N1:6, O1:6	[1:20, 34:20:294, 27:20:287, 261:266, 281:286]	Adefovir Dipivoxil	S1718	microbiology	Microbiology	Reverse Transcriptase	501.47	142340-99-6	free base	Adefovir Dipivoxil(Preveon, Hepsera) works by blocking reverse transcriptase, an enzyme that is crucial for the hepatitis B virus (HBV) to reproduce in the body.	C12=C(N=CN=C1N)N(C=N2)CCOCP(OCOC(C(C)(C)C)=O)(=O)OCOC(C(C)(C)C)=O	199	http://www.selleckchem.com/products/Adefovir-Dipivoxil(Preveon).html
8	1208	L2000-16	a10	10	1	20170412	0	55	60		C15:20	A1:16, B:O7, B:O14, N1:6, O1:6	[1:20, 34:20:294, 27:20:287, 261:266, 281:286]	Rifampin	S1764	microbiology	Others	Others	822.94	13292-46-1	free base	Rifampin is a bactericidal antibiotic agent of the rifamycin group.	C1(=C2C(=C3C(=C1O)C4=C(C(=C3O)C)O[C@@](C4=O)(O/C=C/[C@@H]([C@H]([C@H]([C@@H]([C@@H]([C@@H]([C@H]([C@H](/C=C/C=C(/C(N2)=O)C)C)O)C)O)C)OC(=O)C)C)OC)C)O)/C=N/N5CCN(CC5)C	200	http://www.selleckchem.com/products/Rifampin(Rifadin).html
9	1209	L2000-16	a11	11	1	20170412	0	35	40		B15:20	A1:16, B:O7, B:O14, N1:6, O1:6	[1:20, 34:20:294, 27:20:287, 261:266, 281:286]	Butoconazole nitrate	S1833	microbiology	Others	Others	474.79	64872-77-1	nitrate	Butoconazole nitrate is an anti-fungal agent for IL-2, TNFα, IFN and GM-CSF with IC50 of 7.2 μg/mL, 14.4 μg/mL, 7.36 μg/mL and 7.6 μg/mL, respectively.	C1(=CC=C(C(=C1Cl)SC(CN2C=NC=C2)CCC3=CC=C(C=C3)Cl)Cl).[N+]([O-])(=O)O	200	http://www.selleckchem.com/products/butoconazole-nitrate.html
10	1210	L2000-16	b2	2	2	20170412	0	208	213		K8:13	A1:16, B:O7, B:O14, N1:6, O1:6	[1:20, 34:20:294, 27:20:287, 261:266, 281:286]	LDN-57444	S7135	Protease	Proteases	DUB	397.64	668467-91-2	free base	LDN-57444 is a reversible, competitive proteasome inhibitor for Uch-L1 with IC50 of 0.88 μM, 28-fold selectivity over isoform Uch-L3.	C1(=CC=C2C(=C1)/C(C(N2CC3=CC(=CC=C3Cl)Cl)=O)=N\OC(=O)C)Cl	27	http://www.selleckchem.com/products/ldn-57444.html
11	1211	L2000-16	b3	3	2	20170412	0	188	193		J8:13	A1:16, B:O7, B:O14, N1:6, O1:6	[1:20, 34:20:294, 27:20:287, 261:266, 281:286]	E-64	S7379	Protease	Proteases	Cathepsin K	357.41	66701-25-5	free base	E-64 is an irreversible and selective cysteine protease inhibitor with IC50 of 9 nM for papain.	C1(=CC=C2C(=C1O)C(C3[C@@]([C@H]2C)([C@@H]([C@@]4([C@](C=3O)(C(C(=C([C@H]4N(C)C)O)C(=O)N)=O)O)[H])O)[H])=O).C5(=CC=C6C(=C5O)C(C7[C@@]([C@H]6C)([C@@H]([C@@]8([C@](C=7O)(C(C(=C([C@H]8N(C)C)O)C(=O)N)=O)O)[H])O)[H])=O).Cl.O.CCO.Cl	198	http://www.selleckchem.com/products/e-64.html
12	1212	L2000-16	b4	4	2	20170412	0	168	173		I8:13	A1:16, B:O7, B:O14, N1:6, O1:6	[1:20, 34:20:294, 27:20:287, 261:266, 281:286]	Fluconazole	S1331	microbiology	Others	Others	306.27	86386-73-4	free base	Fluconazole is a triazole antifungal drug used in the treatment and prevention of superficial and systemic fungal infections.	C1(=C(C=C(C=C1)F)F)C(CN2N=CN=C2)(CN3N=CN=C3)O	199	http://www.selleckchem.com/products/Fluconazole.html
13	1213	L2000-16	b5	5	2	20170412	0	148	153		H8:13	A1:16, B:O7, B:O14, N1:6, O1:6	[1:20, 34:20:294, 27:20:287, 261:266, 281:286]	Stavudine (d4T)	S1398	microbiology	Microbiology	Reverse Transcriptase	224.21	3056-17-5	free base	Stavudine is a nucleoside analog reverse transcriptase inhibitor (NARTI) active against HIV.	O1C(C=CC1CO)N2C(NC(C(=C2)C)=O)=O	200	http://www.selleckchem.com/products/Stavudine.html
14	1214	L2000-16	b6	6	2	20170412	0	128	133		G8:13	A1:16, B:O7, B:O14, N1:6, O1:6	[1:20, 34:20:294, 27:20:287, 261:266, 281:286]	Cephalexin	S1502	microbiology	Others	Others	347.39	15686-71-2	free base	Cefalexin is a cephalosporin antibiotic.	C1=CC=C(C=C1)[C@H](C(N[C@@H]2C(N3[C@]2(SCC(=C3C(=O)O)C)[H])=O)=O)N	10	http://www.selleckchem.com/products/Cephalexin-(Cefalexin).html
15	1215	L2000-16	b7	7	2	20170412	0	108	113		F8:13	A1:16, B:O7, B:O14, N1:6, O1:6	[1:20, 34:20:294, 27:20:287, 261:266, 281:286]	Nitazoxanide	S1627	microbiology	Others	Others	307.28	55981-09-4	free base	Nitazoxanide is a synthetic nitrothiazolyl-salicylamide derivative and an antiprotozoal agent. (IC50 for canine influenza virus ranges from 0.17 to 0.21 μM)	C1=CC=CC(=C1OC(C)=O)C(NC2=NC=C(S2)[N+](=O)[O-])=O	201	http://www.selleckchem.com/products/Nitazoxanide(Alinia).html
16	1216	L2000-16	b8	8	2	20170412	0	88	93		E8:13	A1:16, B:O7, B:O14, N1:6, O1:6	[1:20, 34:20:294, 27:20:287, 261:266, 281:286]	Chloramphenicol	S1677	microbiology	Others	Others	323.13	56-75-7	free base	Chloramphenicol is a bacteriostatic antimicrobial.	C1=C(C=CC(=C1)[C@H]([C@H](NC(=O)C(Cl)Cl)CO)O)[N+](=O)[O-]	201	http://www.selleckchem.com/products/Chloramphenicol(Chloromycetin).html
17	1217	L2000-16	b9	9	2	20170412	0	68	73		D8:13	A1:16, B:O7, B:O14, N1:6, O1:6	[1:20, 34:20:294, 27:20:287, 261:266, 281:286]	Zalcitabine	S1719	microbiology	Microbiology	Reverse Transcriptase	211.22	7481-89-2	free base	Zalcitabine is a nucleoside analog HIV reverse transcriptase inhibitor (NARTI).	[C@H]1(CC[C@@H](O1)N2C(N=C(C=C2)N)=O)CO	198	http://www.selleckchem.com/products/Zalcitabine.html
18	1218	L2000-16	b10	10	2	20170412	0	48	53		C8:13	A1:16, B:O7, B:O14, N1:6, O1:6	[1:20, 34:20:294, 27:20:287, 261:266, 281:286]	Sulfadiazine	S1770	microbiology	Others	Others	250.28	68-35-9	free base	Sulfadiazine is a sulfonamide antibiotic.	C1=CC=NC(=N1)NS(C2=CC=C(C=C2)N)(=O)=O	199	http://www.selleckchem.com/products/Sulfadiazine.html
19	1219	L2000-16	b11	11	2	20170412	0	28	33		B8:13	A1:16, B:O7, B:O14, N1:6, O1:6	[1:20, 34:20:294, 27:20:287, 261:266, 281:286]	Chloroxine	S1839	microbiology	Others	Others	214.05	773-76-2	free base	Chloroxine is a synthetic antibacterial compound that is effective in the treatment of dandruff and seborrheic dermatitis when incorporated in a shampoo.	C1=C(C2=C(C(=C1Cl)O)N=CC=C2)Cl	200	http://www.selleckchem.com/products/Chloroxine.html
20	1220	L2000-16	c2	2	3	20170412	0	201	206		K1:6	A1:16, B:O7, B:O14, N1:6, O1:6	[1:20, 34:20:294, 27:20:287, 261:266, 281:286]	TCID	S7140	Protease	Ubiquitin	DUB	283.92	30675-13-9	free base	TCID is a DUB inhibitor for ubiquitin C-terminal hydrolase L3 with IC50 of 0.6 μM, 125-fold selective to L1.	C1(=C(C(=C2C(=C1Cl)C(CC2=O)=O)Cl)Cl)Cl	81	http://www.selleckchem.com/products/tcid.html
21	1221	L2000-16	c3	3	3	20170412	0	181	186		J1:6	A1:16, B:O7, B:O14, N1:6, O1:6	[1:20, 34:20:294, 27:20:287, 261:266, 281:286]	Loxistatin Acid (E-64C)	S7392	Protease	Proteases	Cysteine protease	314.38	76684-89-4	free base	Loxistatin Acid (E-64C), a derivative of E-64, is an irreversible and membrane-permeant cysteine protease inhibitor.	CC(C)CCNC(=O)C(CC(C)C)NC(=O)C1C(O1)C(=O)O	197	http://www.selleckchem.com/products/loxistatin-acid-e-64c.html
22	1222	L2000-16	c4	4	3	20170412	0	161	166		I1:6	A1:16, B:O7, B:O14, N1:6, O1:6	[1:20, 34:20:294, 27:20:287, 261:266, 281:286]	Gatifloxacin	S1340	microbiology	Others	Others	375.39	112811-59-3	free base	Gatifloxacin is an antibiotic of the fourth-generation fluoroquinolone family.	C1(=C(C=C2C(=C1OC)N(C=C(C2=O)C(O)=O)C3CC3)F)N4CCNC(C4)C	18	http://www.selleckchem.com/products/Gatifloxacin.html
23	1223	L2000-16	c5	5	3	20170412	0	141	146		H1:6	A1:16, B:O7, B:O14, N1:6, O1:6	[1:20, 34:20:294, 27:20:287, 261:266, 281:286]	Tenofovir Disoproxil Fumarate	S1400	microbiology	Microbiology	Reverse Transcriptase	635.51	202138-50-9	fumarate	Tenofovir disoproxil fumarate belongs to nucleotide analogue reverse transcriptase inhibitors (nRTIs).	N1(C=NC2=C(C=1N)N=CN2C[C@H](OCP(OCOC(OC(C)C)=O)(OCOC(=O)OC(C)C)=O)C).C(=C/C(=O)O)/C(=O)O	201	http://www.selleckchem.com/products/Tenofovir-Disoproxil-Fumarate.html
24	1224	L2000-16	c6	6	3	20170412	0	121	126		G1:6	A1:16, B:O7, B:O14, N1:6, O1:6	[1:20, 34:20:294, 27:20:287, 261:266, 281:286]	Aztreonam	S1505	microbiology	Others	Others	435.43	78110-38-0	free base	Aztreonam is a synthetic monocyclic beta-lactam antibiotic.	[C@H]1(C(N([C@@H]1C)S(O)(=O)=O)=O)NC(\C(=N/OC(C(O)=O)(C)C)C2N=C(SC=2)N)=O	199	http://www.selleckchem.com/products/Aztreonam(Azactam).html
25	1225	L2000-16	c7	7	3	20170412	0	101	106		F1:6	A1:16, B:O7, B:O14, N1:6, O1:6	[1:20, 34:20:294, 27:20:287, 261:266, 281:286]	Erythromycin	S1635	microbiology	Others	Others	733.93	114-07-8	free base	Erythromycin is a macrolide antibiotic that has an antimicrobial spectrum similar to or slightly wider than that of penicillin (IC50=1.5 μg/ml).	C1[C@H](C([C@@H]([C@@H](O)[C@@]([C@H](OC([C@@H]([C@H]([C@@H]([C@@H](O[C@@H]2[C@@H]([C@@H](CC(C)O2)N(C)C)O)[C@@]1(C)O)C)O[C@@H]3C[C@]([C@@H]([C@H](O3)C)O)(OC)C)C)=O)CC)(O)C)C)=O)C	200	http://www.selleckchem.com/products/Erythromycin(E-Mycin).html
26	1226	L2000-16	c8	8	3	20170412	0	81	86		E1:6	A1:16, B:O7, B:O14, N1:6, O1:6	[1:20, 34:20:294, 27:20:287, 261:266, 281:286]	Flurbiprofen	S1679	microbiology	Others	Others	244.26	5104-49-4	free base	Flurbiprofen is a member of the phenylalkanoic acid derivative family of non-steroidal anti-inflammatory drugs (NSAIDs).	C1(=C(C=CC(=C1)[C@@H](C(O)=O)C)C2=CC=CC=C2)F	200	http://www.selleckchem.com/products/Flurbiprofen(Ansaid).html
27	1227	L2000-16	c9	9	3	20170412	0	61	66		D1:6	A1:16, B:O7, B:O14, N1:6, O1:6	[1:20, 34:20:294, 27:20:287, 261:266, 281:286]	Terbinafine	S1725	microbiology	Others	Others	291.43	91161-71-6	free base	Terbinafine(Lamisil, Terbinex) is used to treat infections caused by a fungus. It works by killing the fungus or preventing its growth.	C1=CC=C2C(=C1)C(=CC=C2)CN(C)C/C=C/C#CC(C)(C)C	199	http://www.selleckchem.com/products/Terbinafine(Lamisil).html
28	1228	L2000-16	c10	10	3	20170412	0	41	46		C1:6	A1:16, B:O7, B:O14, N1:6, O1:6	[1:20, 34:20:294, 27:20:287, 261:266, 281:286]	Oxytetracycline (Terramycin)	S1773	microbiology	Others	Others	460.43	79-57-2	free base	Oxytetracycline(Terramycin) was the second of the broad-spectrum tetracycline group of antibiotics to be discovered.	C1(=C([C@H]([C@]2([C@@](C1=O)(C(C3[C@]([C@@H]2O)([C@@](C4=C(C=3O)C(=CC=C4)O)(O)C)[H])=O)O)[H])N(C)C)O)C(N)=O	199	http://www.selleckchem.com/products/Oxytetracycline(Terramycin).html
29	1229	L2000-16	c11	11	3	20170412	0	21	26		B1:6	A1:16, B:O7, B:O14, N1:6, O1:6	[1:20, 34:20:294, 27:20:287, 261:266, 281:286]	Bifonazole	S1854	microbiology	Others	Others	310.39	60628-96-8	free base	Bifonazole is an antifungal agent and a prostatic aromatase activity inhibitor with IC50 of 1.6 μM.	C1=CC=CC(=C1)C(C2=CC=C(C=C2)C3=CC=CC=C3)N4C=NC=C4	199	http://www.selleckchem.com/products/bifonazole.html
30	1230	L2000-16	d2	2	4	20170412	0	295	300		O15:20	A1:16, B:O7, B:O14, N1:6, O1:6	[1:20, 34:20:294, 27:20:287, 261:266, 281:286]	NSC697923	S7142	Protease	Ubiquitin	E2	267.26	343351-67-7	free base	NSC697923 is a cell-permeable and selective inhibitor of the Ub-conjugating enzyme (E2) complex Ubc13-Uev1A.	CC1=CC=C(C=C1)S(=O)(=O)C2=CC=C(O2)[N+](=O)[O-]	198	http://www.selleckchem.com/products/nsc697923.html
31	1231	L2000-16	d3	3	4	20170412	0	275	280		M15:20	A1:16, B:O7, B:O14, N1:6, O1:6	[1:20, 34:20:294, 27:20:287, 261:266, 281:286]	Aloxistatin	S7393	Protease	Proteases	Cysteine protease	342.43	88321-09-9	free base	Aloxistatin is an irreversible and membrane-permeable cysteine protease inhibitor.	CCOC(=O)C1C(O1)C(=O)NC(CC(C)C)C(=O)NCCC(C)C	198	http://www.selleckchem.com/products/Aloxistatin.html
32	1232	L2000-16	d4	4	4	20170412	0	255	260		N15:20	A1:16, B:O7, B:O14, N1:6, O1:6	[1:20, 34:20:294, 27:20:287, 261:266, 281:286]	Ivermectin	S1351	microbiology	Others	Others	875.09	70288-86-7	free base	Ivermectin is a broad-spectrum antiparasitic medication.	[C@]12([C@]3([C@@H](C(=C[C@@]1(C(O[C@@H]4C[C@]5(O[C@@](C4)(C/C=C(/[C@H]([C@H](/C=C/C=C/2CO3)C)O[C@]6(C[C@@H]([C@H]([C@@H](O6)C)O[C@]7(C[C@@H]([C@H]([C@@H](O7)C)O)OC)[H])OC)[H])C)[H])O[C@@]([C@H](CC5)C)([C@@H](C)CC)[H])=O)[H])C)O)[H])O	199	http://www.selleckchem.com/products/Ivermectin.html
33	1233	L2000-16	d5	5	4	20170412	0	235	240		L15:20	A1:16, B:O7, B:O14, N1:6, O1:6	[1:20, 34:20:294, 27:20:287, 261:266, 281:286]	Tenofovir	S1401	microbiology	Microbiology	Reverse Transcriptase	287.21	147127-20-6	free base	Tenofovir blocks reverse transcriptase and hepatitis B virus infections.	N1=CN=C2C(=C1N)N=CN2C[C@H](OCP(=O)(O)O)C	13	http://www.selleckchem.com/products/Tenofovir.html
34	1234	L2000-16	d6	6	4	20170412	0	288	293		O8:13	A1:16, B:O7, B:O14, N1:6, O1:6	[1:20, 34:20:294, 27:20:287, 261:266, 281:286]	Natamycin	S1517	microbiology	Others	Others	665.73	7681-93-8	free base	Natamycin is a naturally occurring antifungal agent.	[C@@H]1([C@@H]([C@H](O[C@]([C@@H]1O)(O[C@H]2/C=C/C=C/C=C/C=C/C[C@H](OC(=O)/C=C/[C@@H]3[C@@](C[C@@H](C[C@@]4(C[C@@H]([C@H]([C@@](O4)(C2)[H])C(=O)O)O)O)O)(O3)[H])C)[H])C)O)N	10	http://www.selleckchem.com/products/Natamycin(Pimaricin).html
35	1235	L2000-16	d7	7	4	20170412	0	268	273		N8:13	A1:16, B:O7, B:O14, N1:6, O1:6	[1:20, 34:20:294, 27:20:287, 261:266, 281:286]	Amphotericin B	S1636	microbiology	Others	Others	924.08	1397-89-3	free base	Amphotericin B is a polyene, antifungal antibiotic produced from a strain of Streptomyces nodosus. (IC50=0.028–0.290 μg/ml)	[C@@H]1([C@H](C)[C@@H]([C@H](/C=C/C=C/C=C/C=C/C=C/C=C/C=C/[C@@H](C[C@H]2[C@H]([C@H](C[C@](C[C@H](C[C@H]([C@@H](CC[C@H](C[C@H](CC(=O)O1)O)O)O)O)O)(O2)O)O)C(O)=O)O[C@H]3[C@H]([C@H]([C@@H]([C@H](O3)C)O)N)O)C)O)C	23	http://www.selleckchem.com/products/Amphotericin-B(Abelcet).html
36	1236	L2000-16	d8	8	4	20170412	0	248	253		M8:13	A1:16, B:O7, B:O14, N1:6, O1:6	[1:20, 34:20:294, 27:20:287, 261:266, 281:286]	Sulfanilamide	S1685	microbiology	Others	Others	172.2	63-74-1	free base	Sulfanilamide (Sulphanilamide) is a competitive inhibitor for bacterial enzyme dihydropteroate synthetase with IC50 of 320 μM.	C1(=CC=C(C=C1)S(N)(=O)=O)N	197	http://www.selleckchem.com/products/Sulfanilamide.html
37	1237	L2000-16	d9	9	4	20170412	0	228	233		L8:13	A1:16, B:O7, B:O14, N1:6, O1:6	[1:20, 34:20:294, 27:20:287, 261:266, 281:286]	Rifabutin	S1741	microbiology	Others	Others	847	72559-06-9	free base	Rifabutin(Mycobutin) is a semisynthetic ansamycin antibiotic with potent antimycobacterial properties.	[C@@H]1([C@H]([C@@H]([C@@H]([C@@H]([C@H]([C@H](/C=C/C=C(/C(NC2=C3C(C4=C(C2=O)C(=C(C5=C4C([C@](O5)(O/C=C/[C@@H]1OC)C)=O)C)O)=NC6(N3)CCN(CC6)CC(C)C)=O)C)C)O)C)O)C)OC(=O)C)C	70	http://www.selleckchem.com/products/Rifabutin(Mycobutin).html
38	1238	L2000-16	d10	10	4	20170412	0	241	246		M1:6	A1:16, B:O7, B:O14, N1:6, O1:6	[1:20, 34:20:294, 27:20:287, 261:266, 281:286]	Ethionamide	S1777	microbiology	Others	Others	166.24	536-33-4	free base	Ethionamide(2-ethylthioisonicotinamide) is an antibiotic used in the treatment of tuberculosis.	C1=CN=C(C=C1C(=S)N)CC	198	http://www.selleckchem.com/products/Ethionamide.html
39	1239	L2000-16	d11	11	4	20170412	0	221	226		L1:6	A1:16, B:O7, B:O14, N1:6, O1:6	[1:20, 34:20:294, 27:20:287, 261:266, 281:286]	Valaciclovir HCl	S1876	microbiology	Others	Others	360.8	124832-27-5	hydrochloride	Valaciclovir hydrochloride is an antiviral drug used in the management of herpes simplex, herpes zoster, and herpes B.	N1(C(=O)C2=C(N=C1N)N(C=N2)COCCOC([C@H](C(C)C)N)=O).Cl	38	http://www.selleckchem.com/products/valaciclovir-hcl.html
40	1240	L2000-16	e2	2	5	20170412	1	215	220		K15:20	A1:16, B:O7, B:O14, N1:6, O1:6	[1:20, 34:20:294, 27:20:287, 261:266, 281:286]	Batimastat (BB-94)	S7155	Protease	Proteases	MMP	477.64	130370-60-4	free base	Batimastat (BB-94) is a potent, broad spectrum matrix metalloprotease (MMP) inhibitor for MMP-1, MMP-2, MMP-9, MMP-7 and MMP-3 with IC50 of 3 nM, 4 nM, 4 nM, 6 nM and 20 nM, respectively.	ONC([C@H]([C@@H](C(N[C@@H](C(=O)NC)CC1=CC=CC=C1)=O)CC(C)C)CSC2SC=CC=2)=O	200	https://www.selleckchem.com/products/bb-94.html
41	1241	L2000-16	e3	3	5	20170412	1	195	200		J15:20	A1:16, B:O7, B:O14, N1:6, O1:6	[1:20, 34:20:294, 27:20:287, 261:266, 281:286]	Trelagliptin	S7513	Protease	Proteases	DDP-4	357.38	865759-25-7	free base	Trelagliptin is a highly selective, long-acting DPP-4 inhibitor. Phase 3.	CN1C(=O)C=C(N(C1=O)CC2=C(C=CC(=C2)F)C#N)N3CCCC(C3)N	198	http://www.selleckchem.com/products/trelagliptin.html
42	1242	L2000-16	e4	4	5	20170412	1	175	180		I15:20	A1:16, B:O7, B:O14, N1:6, O1:6	[1:20, 34:20:294, 27:20:287, 261:266, 281:286]	BMS-707035	S1366	microbiology	Microbiology	Integrase	410.42	729607-74-3	free base	BMS-707035 is a specific HIV-I integrase (IN) inhibitor with IC50 of 15 nM. Phase 2.	C1(=CC=C(C=C1)CNC(C2N=C(N(C(C=2O)=O)C)N3S(CCCC3)(=O)=O)=O)F	92	http://www.selleckchem.com/products/BMS-707035.html
43	1243	L2000-16	e5	5	5	20170412	1	155	160		H15:20	A1:16, B:O7, B:O14, N1:6, O1:6	[1:20, 34:20:294, 27:20:287, 261:266, 281:286]	Tigecycline	S1403	microbiology	Others	Others	585.65	220620-09-7	free base	Tigecycline is bacteriostatic and is a protein synthesis inhibitor by binding to the 30S ribosomal subunit of bacteria and thereby blocking entry of Aminoacyl-tRNA into the A site of the ribosome during prokaryotic translation.	C1(=CC(=C(C2=C1C[C@@]3(C(C2=O)=C([C@]4([C@@](C3)([C@H](C(=C(C4=O)C(=O)N)O)N(C)C)[H])O)O)[H])O)NC(CNC(C)(C)C)=O)N(C)C	170	http://www.selleckchem.com/products/Tigecycline.html
44	1244	L2000-16	e6	6	5	20170412	1	135	140		G15:20	A1:16, B:O7, B:O14, N1:6, O1:6	[1:20, 34:20:294, 27:20:287, 261:266, 281:286]	Cefdinir	S1605	microbiology	Others	Others	395.41	91832-40-5	free base	Cefdinir(Omnicef) is a bacteriocidal antibiotic.	[C@]12(N(C(=C(CS1)C=C)C(O)=O)C([C@@]2([H])NC(/C(C3N=C(SC=3)N)=N\O)=O)=O)[H]	199	http://www.selleckchem.com/products/Cefdinir(Omnicef).html
45	1245	L2000-16	e7	7	5	20170412	1	115	120		F15:20	A1:16, B:O7, B:O14, N1:6, O1:6	[1:20, 34:20:294, 27:20:287, 261:266, 281:286]	Albendazole	S1640	microbiology	Others	Others	265.33	54965-21-8	free base	Albendazole is a member of the benzimidazole compounds used as a drug indicated for the treatment of a variety of worm infestations.	C1(=CC=C2C(=C1)NC(=N2)NC(OC)=O)SCCC	64	http://www.selleckchem.com/products/Albendazole(Albenza).html
46	1246	L2000-16	e8	8	5	20170412	1	95	100		E15:20	A1:16, B:O7, B:O14, N1:6, O1:6	[1:20, 34:20:294, 27:20:287, 261:266, 281:286]	Praziquantel	S1691	microbiology	Others	Others	312.41	55268-74-1	free base	Praziquantel is an anthelmintic effective against flatworms.	C1=CC=C2C(=C1)C3N(CC2)C(CN(C3)C(C4CCCCC4)=O)=O	201	http://www.selleckchem.com/products/Praziquantel(Biltricide).html
47	1247	L2000-16	e9	9	5	20170412	1	75	80		D15:20	A1:16, B:O7, B:O14, N1:6, O1:6	[1:20, 34:20:294, 27:20:287, 261:266, 281:286]	Nevirapine	S1742	microbiology	Microbiology	Reverse Transcriptase	266.3	129618-40-2	free base	Nevirapine(Viramune) is a non-nucleoside reverse transcriptase inhibitor (NNRTI) used to treat HIV-1 infection and AIDS.	N1(C2CC2)C3=C(NC(C4=C1N=CC=C4)=O)C(=CC=N3)C	199	http://www.selleckchem.com/products/Nevirapine(Viramune).html
48	1248	L2000-16	e10	10	5	20170412	1	55	60		C15:20	A1:16, B:O7, B:O14, N1:6, O1:6	[1:20, 34:20:294, 27:20:287, 261:266, 281:286]	Trifluridine	S1778	microbiology	Others	Others	296.2	70-00-8	free base	Trifluridine (Viroptic) is an anti-herpesvirus antiviral agent used primarily on the eye.	N1C(N(C=C(C1=O)C(F)(F)F)[C@H]2C[C@@H]([C@H](O2)CO)O)=O	199	http://www.selleckchem.com/products/Trifluridine(Viroptic).html
49	1249	L2000-16	e11	11	5	20170412	1	35	40		B15:20	A1:16, B:O7, B:O14, N1:6, O1:6	[1:20, 34:20:294, 27:20:287, 261:266, 281:286]	Ganciclovir	S1878	microbiology	Others	Others	255.23	82410-32-0	free base	Ganciclovir is an antiviral drug for feline herpesvirus type-1 with IC50 of 5.2 μM.	N1C(=NC2=C(C1=O)N=CN2COC(CO)CO)N	195	http://www.selleckchem.com/products/ganciclovir.html
50	1250	L2000-16	f2	2	6	20170412	1	208	213		K8:13	A1:16, B:O7, B:O14, N1:6, O1:6	[1:20, 34:20:294, 27:20:287, 261:266, 281:286]	Ilomastat (GM6001, Galardin)	S7157	Protease	Proteases	MMP	388.46	142880-36-2	free base	GM6001 (galardin, ilomastat) is a broad spectrum matrix metalloprotease (MMP) inhibitor for MMP-1, MMP-2, MMP-3, MMP-7, MMP-8, MMP-9, MMP-12, MMP-14, and MMP-26 with Ki of 0.4 nM, 0.5 nM, 27 nM, 3.7 nM, 0.1 nM, 0.2 nM, 3.6 nM, 13.4 nM, 0.36 nM, respectively.	C1=CC=C2C(=C1)C(=CN2)C[C@@H](C(=O)NC)NC(=O)[C@@H](CC(=O)NO)CC(C)C	200	https://www.selleckchem.com/products/gm6001.html
51	1251	L2000-16	f3	3	6	20170412	1	188	193		J8:13	A1:16, B:O7, B:O14, N1:6, O1:6	[1:20, 34:20:294, 27:20:287, 261:266, 281:286]	NSC 405020	S8072	Protease	Proteases	MMP	260.16	7/6/7497	free base	NSC 405020 is a noncatalytic inhibitor of MT1-MMP, directly interacts with PEX domain of MT1-MMP, affects PEX homodimerization but not catalytic activity of MT1-MMP.	C1=C(C(=CC(=C1)C(NC(CCC)C)=O)Cl)Cl	199	http://www.selleckchem.com/products/nsc-405020.html
52	1252	L2000-16	f4	4	6	20170412	1	168	173		I8:13	A1:16, B:O7, B:O14, N1:6, O1:6	[1:20, 34:20:294, 27:20:287, 261:266, 281:286]	Cefoselis Sulfate	S1371	microbiology	Others	Others	620.64	122841-12-7	sulfate	Cefoselis sulfate is an antibiotic.	C1(C(=C(N2[C@](S1)([C@H](C2=O)NC(=O)/C(=N/OC)C3N=C(SC=3)N)[H])C(=O)O)CN4C=CC(N4CCO)=N).S(O)(O)(=O)=O	10	http://www.selleckchem.com/products/Cefoselis-sulfate.html
53	1253	L2000-16	f5	5	6	20170412	1	148	153		H8:13	A1:16, B:O7, B:O14, N1:6, O1:6	[1:20, 34:20:294, 27:20:287, 261:266, 281:286]	Linezolid	S1408	microbiology	Others	Others	337.35	165800-03-3	free base	Linezolid is a synthetic antibiotic used for the treatment of serious infections.	C1=C(C(=CC(=C1)N2C[C@@H](OC2=O)CNC(C)=O)F)N3CCOCC3	201	http://www.selleckchem.com/products/Linezolid(Zyvox).html
54	1254	L2000-16	f6	6	6	20170412	1	128	133		G8:13	A1:16, B:O7, B:O14, N1:6, O1:6	[1:20, 34:20:294, 27:20:287, 261:266, 281:286]	Clotrimazole	S1606	microbiology	Others	Others	344.84	23593-75-1	free base	Clotrimazole is a synthetic, antifungal and broad-spectrum derivate of imidazole.	C1=CC=CC(=C1)C(C2=C(C=CC=C2)Cl)(C3=CC=CC=C3)N4C=NC=C4	31	http://www.selleckchem.com/products/Clotrimazole(Canesten).html
55	1255	L2000-16	f7	7	6	20170412	1	108	113		F8:13	A1:16, B:O7, B:O14, N1:6, O1:6	[1:20, 34:20:294, 27:20:287, 261:266, 281:286]	Nitrofural	S1644	microbiology	Others	Others	198.14	59-87-0	free base	Nitrofural is a topical anti-infective agent with an IC50 of 22.83 ± 1.2 μM. (Rat LD50 = 590 mg/kg)	C1(=CC=C(O1)/C=N/NC(N)=O)[N+]([O-])=O	201	http://www.selleckchem.com/products/Nitrofurazone(ACTIN-N).html
56	1256	L2000-16	f8	8	6	20170412	1	88	93		E8:13	A1:16, B:O7, B:O14, N1:6, O1:6	[1:20, 34:20:294, 27:20:287, 261:266, 281:286]	Didanosine	S1702	microbiology	Microbiology	Reverse Transcriptase	236.23	69655-05-6	free base	Didanosine(Videx, Videx EC) is a reverse transcriptase inhibitor with an IC50 of 0.49 μM.	[C@H]1(CC[C@@H](O1)N2C3=C(N=C2)C(NC=N3)=O)CO	198	http://www.selleckchem.com/products/Didanosine(Videx).html
57	1257	L2000-16	f9	9	6	20170412	1	68	73		D8:13	A1:16, B:O7, B:O14, N1:6, O1:6	[1:20, 34:20:294, 27:20:287, 261:266, 281:286]	Enoxacin	S1756	microbiology	Others	Others	320.32	74011-58-8	free base	Enoxacin(Penetrex)is an oral broad-spectrum fluoroquinolone antibacterial agent used in the treatment of urinary tract infections and gonorrhea. Insomnia is a common adverse effect.	C1(=C(N=C2C(=C1)C(C(=CN2CC)C(O)=O)=O)N3CCNCC3)F	10	http://www.selleckchem.com/products/Enoxacin(Penetrex).html
58	1258	L2000-16	f10	10	6	20170412	1	48	53		C8:13	A1:16, B:O7, B:O14, N1:6, O1:6	[1:20, 34:20:294, 27:20:287, 261:266, 281:286]	Vidarabine	S1784	microbiology	Others	Others	267.24	5536-17-4	free base	Vidarabine(Vira-A) is an antiviral drug which is active against herpes simplex and varicella zoster viruses.	C1=NC(=C2C(=N1)N(C=N2)[C@H]3[C@H]([C@@H]([C@H](O3)CO)O)O)N	198	http://www.selleckchem.com/products/Vidarabine(Vira-A).html
59	1259	L2000-16	f11	11	6	20170412	1	28	33		B8:13	A1:16, B:O7, B:O14, N1:6, O1:6	[1:20, 34:20:294, 27:20:287, 261:266, 281:286]	Protionamide	S1881	microbiology	Others	Others	180.27	14222-60-7	free base	Protionamide is a drug used in the treatment of tuberculosis.	C1(=NC=CC(=C1)C(N)=S)CCC	199	http://www.selleckchem.com/products/protionamide-prothionamide.html
60	1260	L2000-16	g2	2	7	20170412	1	201	206		K1:6	A1:16, B:O7, B:O14, N1:6, O1:6	[1:20, 34:20:294, 27:20:287, 261:266, 281:286]	ONX-0914 (PR-957)	S7172	Protease	Proteases	Proteasome	580.67	960374-59-8	free base	ONX-0914 (PR-957) is a potent and selective immunoproteasome inhibitor with minimal cross-reactivity for the constitutive proteasome.	N([C@H](C(N[C@H](C(N[C@H](C([C@]1(OC1)C)=O)CC2=CC=CC=C2)=O)CC3=CC=C(C=C3)OC)=O)C)C(CN4CCOCC4)=O	172	http://www.selleckchem.com/products/onx-0914-pr-957.html
61	1261	L2000-16	g3	3	7	20170412	1	181	186		J1:6	A1:16, B:O7, B:O14, N1:6, O1:6	[1:20, 34:20:294, 27:20:287, 261:266, 281:286]	PA-824	S1162	microbiology	Others	Others	359.26	187235-37-6	free base	PA-824 is an anti-tuberculosis drug for tuberculosis with MIC less than 2.8 μM.	O1C2N(C[C@@H](C1)OCC3C=CC(=CC=3)OC(F)(F)F)C=C(N=2)[N+](=O)[O-]	200	http://www.selleckchem.com/products/pa-824.html
62	1262	L2000-16	g4	4	7	20170412	1	161	166		I1:6	A1:16, B:O7, B:O14, N1:6, O1:6	[1:20, 34:20:294, 27:20:287, 261:266, 281:286]	Daptomycin	S1373	microbiology	Others	Others	1620.67	103060-53-3	free base	Daptomycin is a novel antibiotic with rapid in vitro bactericidal activity against gram-positive organisms.	C1NC([C@H]([C@H](OC([C@@H](NC([C@@H](NC([C@H](NC(CNC([C@@H](NC([C@@H](NC([C@H](CC(=O)O)NC(=O)[C@H](NC1=O)CCCN)=O)C)=O)CC(=O)O)=O)=O)CO)=O)[C@H](CC(=O)O)C)=O)CC(C2=CC=CC=C2N)=O)=O)C)NC([C@@H](NC([C@H](NC([C@H](CC3=CNC4=C3C=CC=C4)NC(CCCCCCCCC)=O)=O)CC(N)=O)=O)CC(=O)O)=O)=O	10	http://www.selleckchem.com/products/Daptomycin.html
63	1263	L2000-16	g5	5	7	20170412	1	141	146		H1:6	A1:16, B:O7, B:O14, N1:6, O1:6	[1:20, 34:20:294, 27:20:287, 261:266, 281:286]	Elaiophylin	S1448	microbiology	Others	Others	1025.27	37318-06-2	free base	Elaiophylin shows antiprotozoal activity against Plasmodium falciparum K1a and Trypanosoma brucei brucei GUTat 3.1 strains with IC50 of 0.36 μM and 0.45 μM, respectively.	[C@H]1([C@@H]([C@@H](O[C@](C1)(O[C@H]2[C@H](CC)[C@H](O[C@](C2)([C@H]([C@@H]([C@@H]([C@]3(OC(/C=C/C=C/[C@@H]([C@@](OC(/C=C/C=C/[C@H]3C)=O)([C@H]([C@H]([C@@H]([C@]4(C[C@H]([C@@H]([C@H](O4)C)CC)O[C@]5(C[C@@H]([C@@H]([C@@H](O5)C)O)O)[H])O)C)O)C)[H])C)=O)[H])C)O)C)O)C)[H])C)O)O	47	http://www.selleckchem.com/products/Azalomycin-B.html
64	1264	L2000-16	g6	6	7	20170412	1	121	126		G1:6	A1:16, B:O7, B:O14, N1:6, O1:6	[1:20, 34:20:294, 27:20:287, 261:266, 281:286]	Cefoperazone	S1611	microbiology	Others	Others	645.67	62893-19-0	free base	Cefoperazone is a cephalosporin antibiotic for inhibition of rMrp2-mediated [3H]E217βG uptake with IC50 of 199 μM.	C1(CS[C@]2(N(C=1C(=O)O)C([C@H]2NC(=O)[C@@H](C3=CC=C(C=C3)O)NC(N4C(C(N(CC4)CC)=O)=O)=O)=O)[H])CSC5=NN=NN5C	199	http://www.selleckchem.com/products/cefoperazone-cefobid.html
65	1265	L2000-16	g7	7	7	20170412	1	101	106		F1:6	A1:16, B:O7, B:O14, N1:6, O1:6	[1:20, 34:20:294, 27:20:287, 261:266, 281:286]	Telbivudine	S1651	microbiology	Others	Others	242.23	3424-98-4	free base	Telbivudine is an antiviral agent used in the treatment of hepatitis B infection.	N1C(C(=CN(C1=O)[C@@H]2C[C@H]([C@@H](O2)CO)O)C)=O	198	http://www.selleckchem.com/products/Telbivudine(Sebivo).html
66	1266	L2000-16	g8	8	7	20170412	1	81	86		E1:6	A1:16, B:O7, B:O14, N1:6, O1:6	[1:20, 34:20:294, 27:20:287, 261:266, 281:286]	Emtricitabine	S1704	microbiology	Microbiology	Reverse Transcriptase	247.25	143491-57-0	free base	Emtricitabine (Emtriva) is a nucleoside reverse transcriptase inhibitor with an IC50 of 27.7 μM.	N1=C(C(=CN(C1=O)[C@H]2O[C@H](SC2)CO)F)N	198	http://www.selleckchem.com/products/Emtricitabine.html
67	1267	L2000-16	g9	9	7	20170412	1	61	66		D1:6	A1:16, B:O7, B:O14, N1:6, O1:6	[1:20, 34:20:294, 27:20:287, 261:266, 281:286]	Rifapentine	S1760	microbiology	Others	Others	877.03	61379-65-5	free base	Rifapentine (Priftin) is an antibiotic compound used in the treatment of tuberculosis.	C1(=C2C(=C3C(=C1O)C4=C(C(=C3O)C)O[C@@](C4=O)(O/C=C/[C@@H]([C@H]([C@H]([C@@H]([C@@H]([C@@H]([C@H]([C@H](/C=C/C=C(/C(N2)=O)C)C)O)C)O)C)OC(=O)C)C)OC)C)O)/C=N/N5CCN(CC5)C6CCCC6	114	http://www.selleckchem.com/products/Rifapentine(Priftin).html
68	1268	L2000-16	g10	10	7	20170412	1	41	46		C1:6	A1:16, B:O7, B:O14, N1:6, O1:6	[1:20, 34:20:294, 27:20:287, 261:266, 281:286]	Rifaximin	S1790	microbiology	Others	Others	785.88	80621-81-4	free base	Rifaximin(Xifaxan), an orally administered, semi-synthetic, nonsystemic antibiotic derived from rifamycin SV with antibacterial activity.	[C@@H]1([C@H]([C@@H]([C@@H]([C@H](/C=C/O[C@@]2(OC3C(=C(C4C(=C(NC(/C(=C\C=C\[C@H]([C@@H]([C@@H]1C)O)C)C)=O)C5=C(C=4C=3C2=O)N=C6N5C=CC(=C6)C)O)O)C)C)OC)C)OC(C)=O)C)O	59	http://www.selleckchem.com/products/Rifaximin(Xifaxan).html
69	1269	L2000-16	g11	11	7	20170412	1	21	26		B1:6	A1:16, B:O7, B:O14, N1:6, O1:6	[1:20, 34:20:294, 27:20:287, 261:266, 281:286]	Idoxuridine	S1883	microbiology	Others	Others	354.1	54-42-2	free base	Idoxuridine is an antiviral agent for feline herpesvirus type-1 with IC50 of 4.3 µM.	C1(=CN(C(NC1=O)=O)[C@@H]2O[C@@H]([C@H](C2)O)CO)I	10	http://www.selleckchem.com/products/idoxuridine.html
70	1270	L2000-16	h2	2	8	20170412	1	295	300		O15:20	A1:16, B:O7, B:O14, N1:6, O1:6	[1:20, 34:20:294, 27:20:287, 261:266, 281:286]	DBeQ	S7199	Protease	Ubiquitin	p97	340.42	177355-84-9	free base	DBeQ is a selective, potent, reversible, and ATP-competitive p97 inhibitor with IC50 of 1.5 μM.	C1=CC=C2C(=C1)N=C(N=C2NCC3=CC=CC=C3)NCC4=CC=CC=C4	199	http://www.selleckchem.com/products/dbeq.html
71	1271	L2000-16	h3	3	8	20170412	1	275	280		M15:20	A1:16, B:O7, B:O14, N1:6, O1:6	[1:20, 34:20:294, 27:20:287, 261:266, 281:286]	Entecavir Hydrate	S1252	microbiology	Others	Others	295.29	209216-23-9	hydrate	Entecavir hydrate belongs to the family of medicines called antivirals.	N1(=C(NC2=C(C1=O)N=CN2[C@H]3C[C@@H]([C@H](C3=C)CO)O)N).O	199	http://www.selleckchem.com/products/Entecavir.html
72	1272	L2000-16	h4	4	8	20170412	1	255	260		N15:20	A1:16, B:O7, B:O14, N1:6, O1:6	[1:20, 34:20:294, 27:20:287, 261:266, 281:286]	Doripenem Hydrate	S1374	microbiology	Others	Others	438.52	364622-82-2	hydrate	Doripenem Hydrate is an ultra-broad spectrum injectable antibiotic.	C1([C@]([C@]2(N1C(=C([C@H]2C)S[C@@H]3CN[C@@H](C3)CNS(N)(=O)=O)C(=O)O)[H])([C@H](C)O)[H])=O.O	82	http://www.selleckchem.com/products/Doripenem-Hydrate.html
73	1273	L2000-16	h5	5	8	20170412	1	235	240		L15:20	A1:16, B:O7, B:O14, N1:6, O1:6	[1:20, 34:20:294, 27:20:287, 261:266, 281:286]	Nanchangmycin	S1450	microbiology	Others	Others	889.1	65101-87-3	free base	Nanchangmycin (dianemycin) is a polyether antibiotic with similar structure to dianemycin and is very active against a broad spectrum of harmful nematodes and insects but not for for mammals and plants.	[O-]C([C@H](C[C@@H](C)C(/C(=C/[C@@H]([C@]1(O[C@]2(C[C@@H]([C@@H]1C)O)CC[C@](O2)([C@@]3(O[C@]4([C@@H]([C@H](C3)OC5O[C@@H]([C@H](CC5)OC)C)C)[C@H](C[C@@](O4)([C@]6(O[C@]([C@@H](C[C@H]6C)C)(CO)O)[H])[H])C)[H])C)[H])C)C)=O)C)=O.[Na+]	194	http://www.selleckchem.com/products/Nanchangmycin.html
74	1274	L2000-16	h6	6	8	20170412	1	288	293		O8:13	A1:16, B:O7, B:O14, N1:6, O1:6	[1:20, 34:20:294, 27:20:287, 261:266, 281:286]	Sulfapyridine	S1617	microbiology	Others	Others	249.29	144-83-2	free base	Sulfapyridine(Dagenan) is a sulfonamide antibacterial.	C1=CC=CC(=N1)NS(C2=CC=C(C=C2)N)(=O)=O	10	http://www.selleckchem.com/products/Sulfapyridine(Dagenan).html
75	1275	L2000-16	h7	7	8	20170412	1	268	273		N8:13	A1:16, B:O7, B:O14, N1:6, O1:6	[1:20, 34:20:294, 27:20:287, 261:266, 281:286]	Flucytosine	S1666	microbiology	Others	Others	129.09	2022-85-7	free base	Flucytosine (5-Fluorocytosine, 5-FC) is an antifungal drug with IC50 of 0.93 μM in C. albicans.	C1(NC=C(C(=N1)N)F)=O	61	http://www.selleckchem.com/products/Flucytosine(Ancobon).html
76	1276	L2000-16	h8	8	8	20170412	1	248	253		M8:13	A1:16, B:O7, B:O14, N1:6, O1:6	[1:20, 34:20:294, 27:20:287, 261:266, 281:286]	Lamivudine	S1706	microbiology	Microbiology	Reverse Transcriptase	229.26	134678-17-4	free base	Lamivudine(Epivir) is a potent nucleoside analog reverse transcriptase inhibitor with an IC50 of 2.7 mM.	N1=C(C=CN(C1=O)[C@H]2O[C@H](SC2)CO)N	200	http://www.selleckchem.com/products/Lamivudine(Epivir).html
77	1277	L2000-16	h9	9	8	20170412	1	228	233		L8:13	A1:16, B:O7, B:O14, N1:6, O1:6	[1:20, 34:20:294, 27:20:287, 261:266, 281:286]	Pyrazinamide	S1762	microbiology	Others	Others	123.11	98-96-4	free base	Pyrazinamide is an agent used to treat tuberculosis.	C1=CN=CC(=N1)C(=O)N	203	http://www.selleckchem.com/products/Pyrazinamide(Pyrazinoic-acid-amide).html
78	1278	L2000-16	h10	10	8	20170412	1	241	246		M1:6	A1:16, B:O7, B:O14, N1:6, O1:6	[1:20, 34:20:294, 27:20:287, 261:266, 281:286]	Aciclovir	S1807	microbiology	Others	Others	225.2	59277-89-3	free base	Acyclovir is a synthetic nucleoside analogue active against herpesviruses.	OCCOCN1C2=C(N=C1)C(NC(=N2)N)=O	199	http://www.selleckchem.com/products/Acyclovir(Aciclovir).html
79	1279	L2000-16	h11	11	8	20170412	1	221	226		L1:6	A1:16, B:O7, B:O14, N1:6, O1:6	[1:20, 34:20:294, 27:20:287, 261:266, 281:286]	Sparfloxacin	S1884	microbiology	Others	Others	392.4	110871-86-8	free base	Sparfloxacin is a fluoroquinolone antibiotic, shows broad and potent antibacterial activity.	[C@@H]1(N[C@H](CN(C1)C2=C(C3=C(C(=C2F)N)C(C(=CN3C4CC4)C(O)=O)=O)F)C)C	22	http://www.selleckchem.com/products/sparfloxacin.html
80	1280	L2000-17	a2	2	1	20170418	0	215	220		K15:20	A1:16, B:O7, B:O14, N1:6, O1:6	[1:20, 34:20:294, 27:20:287, 261:266, 281:286]	Metronidazole	S1907	microbiology	Others	Others	171.15	443-48-1	free base	Metronidazole(Flagyl)is a nitroimidazole antibiotic medication used particularly for anaerobic bacteria and protozoa.	N1(CCO)C(=CN=C1C)[N+](=O)[O-]	198	http://www.selleckchem.com/products/Metronidazole(Flagyl).html
81	1281	L2000-17	a3	3	1	20170418	0	195	200		J15:20	A1:16, B:O7, B:O14, N1:6, O1:6	[1:20, 34:20:294, 27:20:287, 261:266, 281:286]	Sulfamethizole	S1957	microbiology	Others	Others	270.33	144-82-1	free base	Sulfamethizole(Proklar) is a sulfathiazole antibacterial agent.	C1=C(C=CC(=C1)S(NC2SC(=NN=2)C)(=O)=O)N	199	http://www.selleckchem.com/products/Sulfamethizole(Proklar).html
82	1282	L2000-17	a4	4	1	20170418	0	175	180		I15:20	A1:16, B:O7, B:O14, N1:6, O1:6	[1:20, 34:20:294, 27:20:287, 261:266, 281:286]	Balofloxacin	S2064	microbiology	Others	Others	389.42	127294-70-6	free base	Balofloxacin is quinolone antibiotic, inhibiting the synthesis of bacterial DNA by interference with the enqyme DNA gyrase.	N1(C2=C(C3=C(C=C2F)C(C(=CN3C4CC4)C(=O)O)=O)OC)CC(CCC1)NC	12	http://www.selleckchem.com/products/balofloxacin.html
83	1283	L2000-17	a5	5	1	20170418	0	155	160		H15:20	A1:16, B:O7, B:O14, N1:6, O1:6	[1:20, 34:20:294, 27:20:287, 261:266, 281:286]	Ribavirin	S2504	microbiology	Others	Others	244.20864	36791-04-5	free base	Ribavirin (Copegus) is an anti-viral agent indicated for severe RSV infection (individually), hepatitis C infection and other viral infections.	O1[C@@H]([C@H]([C@H]([C@H]1N2C=NC(=N2)C(N)=O)O)O)CO	200	http://www.selleckchem.com/products/Ribavirin(Copegus).html
84	1284	L2000-17	a6	6	1	20170418	0	135	140		G15:20	A1:16, B:O7, B:O14, N1:6, O1:6	[1:20, 34:20:294, 27:20:287, 261:266, 281:286]	Secnidazole	S2537	microbiology	Others	Others	185.18	3366-95-8	free base	Secnidazole (Flagentyl) is a nitroimidazole anti-infective.	N1(CC(C)O)C(=CN=C1C)[N+]([O-])=O	199	http://www.selleckchem.com/products/Secnidazole-Flagentyl.html
85	1285	L2000-17	a7	7	1	20170418	0	115	120		F15:20	A1:16, B:O7, B:O14, N1:6, O1:6	[1:20, 34:20:294, 27:20:287, 261:266, 281:286]	Tetracycline HCl	S2574	microbiology	Others	Others	480.9	64-75-5	hydrochloride	Tetracycline hydrochloride is a hydrochloride salt of tetracycline that is a broad-spectrum polyketide antibiotic.	C1(=CC=C2C(=C1O)C(C3=C([C@]4([C@@](C[C@@]([C@]2(C)O)([H])3)([C@@](C(=C(C4=O)C(N)=O)O)(N(C)C)[H])[H])O)O)=O).Cl	10	http://www.selleckchem.com/products/tetracycline-hydrochloride.html
86	1286	L2000-17	a8	8	1	20170418	0	95	100		E15:20	A1:16, B:O7, B:O14, N1:6, O1:6	[1:20, 34:20:294, 27:20:287, 261:266, 281:286]	Dapivirine (TMC120)	S2914	microbiology	Microbiology	Reverse Transcriptase	329.4	244767-67-7	free base	Dapivirine is a non-nucleoside inhibitor for HIV reverse transcriptase with IC50 of 24 nM, inhibits a broad panel of HIV-1 isolates from different classes, inclucing a wide range of NNRTI-resistant isolates. Phase 3.	N1=C(N=CC=C1NC2C(=CC(=CC=2C)C)C)NC3=CC=C(C#N)C=C3	103	http://www.selleckchem.com/products/dapivirine.html
87	1287	L2000-17	a9	9	1	20170418	0	75	80		D15:20	A1:16, B:O7, B:O14, N1:6, O1:6	[1:20, 34:20:294, 27:20:287, 261:266, 281:286]	Trimethoprim	S3129	microbiology	Others	Others	290.32	738-70-5	free base	Trimethoprim is a bacteriostatic antibiotic mainly used in the prophylaxis and treatment of urinary tract infections.	C1(N=C(C(=CN=1)CC2C=C(C(=C(C=2)OC)OC)OC)N)N	199	http://www.selleckchem.com/products/trimethoprim.html
88	1288	L2000-17	a10	10	1	20170418	0	55	60		C15:20	A1:16, B:O7, B:O14, N1:6, O1:6	[1:20, 34:20:294, 27:20:287, 261:266, 281:286]	Carbenicillin disodium	S3179	microbiology	Others	Others	422.36	4800-94-6	disodium	Carbenicillin is a semi-synthetic penicillin antibiotic which interferes with cell wall synthesis of gram-negative bacteria while displaying low toxicity.	N12([C@H](C(S[C@]([C@@H](C1=O)NC(=O)C(C3C=CC=CC=3)C(=O)[O-])2[H])(C)C)C(=O)[O-]).[Na+].[Na+]	11	http://www.selleckchem.com/products/carbenicillin-disodium.html
89	1289	L2000-17	a11	11	1	20170418	0	35	40		B15:20	A1:16, B:O7, B:O14, N1:6, O1:6	[1:20, 34:20:294, 27:20:287, 261:266, 281:286]	Ronidazole	S4062	microbiology	Others	Others	200.15	7681-76-7	free base	Ronidazole is an antiprotozoal agent.	C1(N(C(=NC=1)COC(N)=O)C)[N+](=O)[O-]	199	http://www.selleckchem.com/products/ronidazole.html
90	1290	L2000-17	b2	2	2	20170418	0	208	213		K8:13	A1:16, B:O7, B:O14, N1:6, O1:6	[1:20, 34:20:294, 27:20:287, 261:266, 281:286]	Tioconazole	S1910	microbiology	Others	Others	387.71	65899-73-2	free base	Tioconazole is an antifungal medication with an average IC50 of 1.7 μM.	C1=C(C(=CC=C1Cl)C(OCC2C=CSC=2Cl)CN3C=CN=C3)Cl	201	http://www.selleckchem.com/products/tioconazole.html
91	1291	L2000-17	b3	3	2	20170418	0	188	193		J8:13	A1:16, B:O7, B:O14, N1:6, O1:6	[1:20, 34:20:294, 27:20:287, 261:266, 281:286]	Sulbactam	S1958	microbiology	Others	Others	233.24	68373-14-8	free base	Sulbactam is a beta-lactamase inhibitor with an average IC50 of 0.8 μM.	C1(C[C@@]2(N1[C@](C(S2(=O)=O)(C)C)([H])C(O)=O)[H])=O	201	http://www.selleckchem.com/products/sulbactam.html
92	1292	L2000-17	b4	4	2	20170418	0	168	173		I8:13	A1:16, B:O7, B:O14, N1:6, O1:6	[1:20, 34:20:294, 27:20:287, 261:266, 281:286]	Arbidol HCl	S2120	microbiology	Others	Others	513.88	131707-23-8	hydrochloride	Arbidol is an antiviral treatment for influenza infection.	C1(=C(C=C2C(=C1CN(C)C)C(=C(N2C)CSC3=CC=CC=C3)C(OCC)=O)Br)O.Cl	200	http://www.selleckchem.com/products/Arbidol-hcl.html
93	1293	L2000-17	b5	5	2	20170418	0	148	153		H8:13	A1:16, B:O7, B:O14, N1:6, O1:6	[1:20, 34:20:294, 27:20:287, 261:266, 281:286]	Spectinomycin HCl	S2510	microbiology	Others	Others	405.27	21736-83-4	hydrochloride	Spectinomycin HCl is a new parenteral antibiotic prepared from Streptomyces spectabilis.	[C@H]1([C@@H]([C@@H]([C@@]2([C@@]([C@@H]1O)(O[C@]3([C@@](O2)(C(C[C@H](O3)C)=O)O)[H])[H])[H])NC)O)NC.Cl.Cl	244	www.selleckchem.com/products/Spectinomycin--hydrochloride.html
94	1294	L2000-17	b6	6	2	20170418	0	128	133		G8:13	A1:16, B:O7, B:O14, N1:6, O1:6	[1:20, 34:20:294, 27:20:287, 261:266, 281:286]	Lomefloxacin HCl	S2539	microbiology	Others	Others	387.81	98079-52-8	hydrochloride	Lomefloxacin hydrochloride (Maxaquin) is a hydrochloride salt of lomefloxacin and is a fluoroquinolone antibiotic.	C1(=C(C=C2C(=C1F)N(C=C(C2=O)C(=O)O)CC)F)N3(CCNC(C3)C).Cl	10	http://www.selleckchem.com/products/Lomefloxacin-hydrochloride-Maxaquin.html
95	1295	L2000-17	b7	7	2	20170418	0	108	113		F8:13	A1:16, B:O7, B:O14, N1:6, O1:6	[1:20, 34:20:294, 27:20:287, 261:266, 281:286]	Vancomycin HCl (Vancocin)	S2575	microbiology			1485.71	1404-93-9		Vancomycin hydrochloride (Vancocin) is a hydrochloride of vancomycin that is a narrow-spectrum glycopeptide antibacterial agent.	[C@H]1([C@@H](O[C@H](C[C@]1(N)C)O[C@@H]2[C@H]([C@@H]([C@H](O[C@@H]2OC3=C4C=C5C=C3OC6=CC=C(C=C6Cl)[C@H]([C@H](C(=O)N[C@](C(N[C@]5(C(=O)N[C@]7(C(N[C@@](C(N[C@@H](C8=C(C9C=C7C=CC=9O)C(=CC(=C8)O)O)C(O)=O)=O)([C@@H](C%10=CC=C(C(=C%10)Cl)O4)O)[H])=O)[H])[H])=O)(CC(N)=O)[H])NC([C@@](CC(C)C)(NC)[H])=O)O)CO)O)O)C)O.Cl
96	1296	L2000-17	b8	8	2	20170418	0	88	93		E8:13	A1:16, B:O7, B:O14, N1:6, O1:6	[1:20, 34:20:294, 27:20:287, 261:266, 281:286]	Clevudine	S3001	microbiology	Others	Others	260.22	163252-36-6	free base	Clevudine is an antiviral drug for the treatment of hepatitis B.	N1C(C(=CN(C1=O)[C@H]2O[C@H]([C@@H]([C@@H]2F)O)CO)C)=O	199	http://www.selleckchem.com/products/clevudine-levovir.html
97	1297	L2000-17	b9	9	2	20170418	0	68	73		D8:13	A1:16, B:O7, B:O14, N1:6, O1:6	[1:20, 34:20:294, 27:20:287, 261:266, 281:286]	Sulfamerazine	S3132	microbiology	Others	Others	264.3	127-79-7	free base	Sulfamerazine is a sulfonamide antibacterial.	C1(C=CC(=CC=1)N)S(=O)(=O)NC2N=C(C=CN=2)C	200	http://www.selleckchem.com/products/sulfamerazine.html
98	1298	L2000-17	b10	10	2	20170418	0	48	53		C8:13	A1:16, B:O7, B:O14, N1:6, O1:6	[1:20, 34:20:294, 27:20:287, 261:266, 281:286]	Azlocillin sodium salt	S3195	microbiology	Others	Others	484.48	37091-65-9	sodium	Azlocillin is an acylampicillin with a broad spectrum against bacteria.	N12(C(C(SC(C(C1=O)NC(=O)[C@@H](C3C=CC=CC=3)NC(=O)N4CCNC4=O)2)(C)C)C(=O)O).[Na]	200	http://www.selleckchem.com/products/azlocillin-sodium-salt.html
99	1299	L2000-17	b11	11	2	20170418	0	28	33		B8:13	A1:16, B:O7, B:O14, N1:6, O1:6	[1:20, 34:20:294, 27:20:287, 261:266, 281:286]	Tinidazole	S4068	microbiology	Others	Others	247.27	19387-91-8	free base	Tinidazole is an anti-parasitic drug.	C1N=C(N(C=1[N+](=O)[O-])CCS(CC)(=O)=O)C	198	http://www.selleckchem.com/products/tinidazole.html
100	1300	L2000-17	c2	2	3	20170418	0	201	206		K1:6	A1:16, B:O7, B:O14, N1:6, O1:6	[1:20, 34:20:294, 27:20:287, 261:266, 281:286]	Sulfamethoxazole	S1915	microbiology	Others	Others	253.28	723-46-6	free base	Sulfamethoxazole is a sulfonamide bacteriostatic antibiotic with an IC50 of 2.7 μM.	C1=C(C=CC(=C1)S(NC2C=C(ON=2)C)(=O)=O)N	201	http://www.selleckchem.com/products/Sulfamethoxazole.html
101	1301	L2000-17	c3	3	3	20170418	0	181	186		J1:6	A1:16, B:O7, B:O14, N1:6, O1:6	[1:20, 34:20:294, 27:20:287, 261:266, 281:286]	Rimantadine	S1964	microbiology	Others	Others	179.3	13392-28-4	free base	Rimantadine (Flumadine) is an anti-influenza virus drug for T. brucei with IC50 of 7 μM.	C1C2CC3CC1(CC(C2)C3)C(N)C	184	http://www.selleckchem.com/products/rimantadine-flumadine.html
102	1302	L2000-17	c4	4	3	20170418	0	161	166		I1:6	A1:16, B:O7, B:O14, N1:6, O1:6	[1:20, 34:20:294, 27:20:287, 261:266, 281:286]	Sitafloxacin Hydrate	S2152	microbiology	Others	Others	436.84	163253-35-8	free base	Sitafloxacin Hydrate is a new-generation, broad-spectrum oral fluoroquinolone antibiotic.	N1(C=C(C(C2C=C(C(=C(C1=2)Cl)N3CC4(CC4)[C@H](C3)N)F)=O)C(=O)O)[C@H]5([C@H](C5)F).[R]	10	http://www.selleckchem.com/products/Sitafloxacin(DU-6859A).html
103	1303	L2000-17	c5	5	3	20170418	0	141	146		H1:6	A1:16, B:O7, B:O14, N1:6, O1:6	[1:20, 34:20:294, 27:20:287, 261:266, 281:286]	Methacycline HCl	S2527	microbiology	Others	Others	478.88	3963-95-9	hydrochloride	Methacycline HCl is a tetracycline antibiotic.	C1(=CC(=C2C(=C1)C([C@@]3(C(=C([C@]4([C@@]([C@@H]3O)([C@H](C(=C(C4=O)C(N)=O)O)N(C)C)[H])O)O)C2=O)[H])=C)O).Cl	10	http://www.selleckchem.com/products/Methacycline-hydrochloride-Physiomycine.html
104	1304	L2000-17	c6	6	3	20170418	0	121	126		G1:6	A1:16, B:O7, B:O14, N1:6, O1:6	[1:20, 34:20:294, 27:20:287, 261:266, 281:286]	Ceftiofur HCl	S2543	microbiology	Others	Others	560.02	103980-44-5	hydrochloride	Ceftiofur hydrochloride is a hydrochloride of ceftiofur that is a broad spectrum cephalosporin.	N12([C@](SCC(=C1C(O)=O)CSC(C3OC=CC=3)=O)([C@@](C2=O)([H])NC(/C(=N/OC)C4N=C(SC=4)N)=O)[H]).Cl	199	http://www.selleckchem.com/products/Ceftiofur-hydrochloride.html
105	1305	L2000-17	c7	7	3	20170418	0	101	106		F1:6	A1:16, B:O7, B:O14, N1:6, O1:6	[1:20, 34:20:294, 27:20:287, 261:266, 281:286]	Zidovudine	S2579	microbiology	Microbiology	Reverse Transcriptase	267.24	30516-87-1	free base	Zidovudine (Retrovir) is a reverse transcriptase inhibitor.	N1C(N(C=C(C1=O)C)[C@@H]2O[C@@H]([C@H](C2)N=[N+]=[N-])CO)=O	10	http://www.selleckchem.com/products/zidovudine-retrovir.html
106	1306	L2000-17	c8	8	3	20170418	0	81	86		E1:6	A1:16, B:O7, B:O14, N1:6, O1:6	[1:20, 34:20:294, 27:20:287, 261:266, 281:286]	Zanamivir	S3007	microbiology	Others	Others	332.31	139110-80-8	free base	Zanamivir is a neuraminidase inhibitor used in the treatment and prophylaxis of influenza caused by influenza A virus and influenza B virus.	[C@@H]1(C=C(O[C@]([C@H]1NC(C)=O)([C@H](O)[C@H](O)CO)[H])C(=O)O)NC(=N)N	10	http://www.selleckchem.com/products/zanamivir-relenza.html
107	1307	L2000-17	c9	9	3	20170418	0	61	66		D1:6	A1:16, B:O7, B:O14, N1:6, O1:6	[1:20, 34:20:294, 27:20:287, 261:266, 281:286]	Sulfamethazine	S3133	microbiology	Others	Others	278.33	57-68-1	free base	Sulfamethazine is a sulfonamide antibacterial.	C1=C(C=CC(=C1)S(NC2=NC(=CC(=N2)C)C)(=O)=O)N	201	http://www.selleckchem.com/products/sulfamethazine.html
108	1308	L2000-17	c10	10	3	20170418	0	41	46		C1:6	A1:16, B:O7, B:O14, N1:6, O1:6	[1:20, 34:20:294, 27:20:287, 261:266, 281:286]	Ethambutol HCl	S4004	microbiology	Others	Others	277.23	1070-11-7	hydrochloride	Ethambutol is a bacteriostatic antimycobacterial agent, which obstructs the formation of cell wall by inhibiting arabinosyl transferases.	[C@H](NCCN[C@@H](CC)CO)(CC)CO.Cl.Cl	201	http://www.selleckchem.com/products/ethambutol-hcl.html
109	1309	L2000-17	c11	11	3	20170418	0	21	26		B1:6	A1:16, B:O7, B:O14, N1:6, O1:6	[1:20, 34:20:294, 27:20:287, 261:266, 281:286]	Sodium 4-Aminosalicylate	S4073	microbiology	NF-κB	NF-κB	211.15	6018-19-5	sodium	Sodium 4-Aminosalicylate is an antibiotic used to treat tuberculosis via NF-κB inhibition and free radical scavenging.	[O-]C(C1=C(C=C(C=C1)N)O)=O.[Na+]	198	http://www.selleckchem.com/products/aminosalicylate-sodium.html
110	1310	L2000-17	d2	2	4	20170418	0	295	300		O15:20	A1:16, B:O7, B:O14, N1:6, O1:6	[1:20, 34:20:294, 27:20:287, 261:266, 281:286]	Sulfisoxazole	S1916	microbiology	Others	Others	267.3	127-69-5	free base	Sulfisoxazole is a sulfonamide antibacterial with an oxazole substituent.	C1=C(C=CC(=C1)S(NC2=C(C(=NO2)C)C)(=O)=O)N	198	http://www.selleckchem.com/products/Sulfisoxazole.html
111	1311	L2000-17	d3	3	4	20170418	0	275	280		M15:20	A1:16, B:O7, B:O14, N1:6, O1:6	[1:20, 34:20:294, 27:20:287, 261:266, 281:286]	Sarafloxacin HCl	S1977	microbiology	Others	Others	421.83	91296-87-6	hydrochloride	Sarafloxacin HCl is a hydrochloride salt form of sarafloxacin which is a quinolone antibiotic drug with IC50 of 0.96 μg/L.	C1(=CN(C2=C(C1=O)C=C(C(=C2)N3CCNCC3)F)C4=CC=C(C=C4)F)C(=O)O.Cl	10	http://www.selleckchem.com/products/sarafloxacin-hydrochloride.html
112	1312	L2000-17	d4	4	4	20170418	0	255	260		N15:20	A1:16, B:O7, B:O14, N1:6, O1:6	[1:20, 34:20:294, 27:20:287, 261:266, 281:286]	Tebipenem Pivoxil	S2159	microbiology	Others	Others	497.63	161715-24-8	free base	Tebipenem pivoxil is a novel oral carbapenem antibiotic with an IC50 of 100 μg/ml for human CYP isoforms	[C@]1(C(N2[C@]1([C@@H](C(=C2C(OCOC(C(C)(C)C)=O)=O)SC3CN(C3)C4SCCN=4)C)[H])=O)([C@@H](C)O)[H]	198	http://www.selleckchem.com/products/Tebipenem-pivoxil(L-084).html
113	1313	L2000-17	d5	5	4	20170418	0	235	240		L15:20	A1:16, B:O7, B:O14, N1:6, O1:6	[1:20, 34:20:294, 27:20:287, 261:266, 281:286]	Ciclopirox	S2528	microbiology	Others	Others	207.27	29342-05-0	free base	Ciclopirox (Penlac) is a synthetic antifungal agent.	C1CCCC(C1)C2N(C(C=C(C=2)C)=O)O	202	http://www.selleckchem.com/products/Ciclopirox-Penlac.html
114	1314	L2000-17	d6	6	4	20170418	0	288	293		O8:13	A1:16, B:O7, B:O14, N1:6, O1:6	[1:20, 34:20:294, 27:20:287, 261:266, 281:286]	Sulbactam sodium	S2551	microbiology	Others	Others	255.22	69388-84-7	sodium	Sulbactam sodium (Unasyn) is an irreversible β-lactamase inhibitor.	C1(C[C@@]2(N1[C@](C(S2(=O)=O)(C)C)([H])C([O-])=O)[H])=O.[Na+]	11	http://www.selleckchem.com/products/sulbactam-sodium-unasyn.html
115	1315	L2000-17	d7	7	4	20170418	0	268	273		N8:13	A1:16, B:O7, B:O14, N1:6, O1:6	[1:20, 34:20:294, 27:20:287, 261:266, 281:286]	Thiamphenicol	S2583	microbiology	Others	Others	356.22	15318-45-3	free base	Thiamphenicol is an antimicrobial antibiotic and a methyl-sulfonyl analogue of chloramphenicol.	C1=C(C=CC(=C1)[C@H]([C@H](NC(C(Cl)Cl)=O)CO)O)S(C)(=O)=O	10	http://www.selleckchem.com/products/thiamphenicol-thiophenicol.html
116	1316	L2000-17	d8	8	4	20170418	0	248	253		M8:13	A1:16, B:O7, B:O14, N1:6, O1:6	[1:20, 34:20:294, 27:20:287, 261:266, 281:286]	Amoxicillin	S3015	microbiology	Others	Others	365.4	26787-78-0	free base	Amoxicillin is a moderate-spectrum, bacteriolytic, β-lactam antibiotic used to treat bacterial infections caused by susceptible microorganisms.	[C@H]1(C(N2[C@]1(SC([C@@H]2C(=O)O)(C)C)[H])=O)NC(=O)[C@@H](C3=CC=C(C=C3)O)N	10	http://www.selleckchem.com/products/amoxicillin-amoxycillin.html
117	1317	L2000-17	d9	9	4	20170418	0	228	233		L8:13	A1:16, B:O7, B:O14, N1:6, O1:6	[1:20, 34:20:294, 27:20:287, 261:266, 281:286]	Methenamine	S3139	microbiology	Others	Others	140.19	100-97-0	free base	Methenamine is an antibiotic used for the treatment of urinary tract infection.	C1N2CN3CN1CN(C2)C3	199	http://www.selleckchem.com/products/methenamine-mandelamine.html
118	1318	L2000-17	d10	10	4	20170418	0	241	246		M1:6	A1:16, B:O7, B:O14, N1:6, O1:6	[1:20, 34:20:294, 27:20:287, 261:266, 281:286]	Doxycycline HCl	S4005	microbiology	Others	MMP,Others	480.9	10592-13-9	hydrochloride	Doxycycline HCL is a tetracycline antibiotic that commonly used to treat a variety of infections and MMP inhibitor.	Cl.C1=CC(=C2C(=C1)[C@H]([C@@]3(C(C2=O)=C([C@]4([C@@]([C@@H]3O)([C@H](C(=C(C4=O)C(N)=O)O)N(C)C)[H])O)O)[H])C)O	10	http://www.selleckchem.com/products/doxycycline-hcl.html
119	1319	L2000-17	d11	11	4	20170418	0	221	226		L1:6	A1:16, B:O7, B:O14, N1:6, O1:6	[1:20, 34:20:294, 27:20:287, 261:266, 281:286]	Spiramycin	S4082	microbiology	Others	Others	843.058	8025-81-8	free base	Spiramycin is a 16-membered ring macrolide (antibiotic).	C1[C@H](OC(C[C@H]([C@H]([C@H]([C@H](C[C@H]([C@H](/C=C/C=C/1)O[C@@H]2O[C@H]([C@H](CC2)N(C)C)C)C)CC=O)O[C@@H]3[C@H]([C@@H]([C@H]([C@@H](O3)C)O[C@@H]4C[C@@]([C@@H]([C@H](O4)C)O)(O)C)N(C)C)O)OC)O)=O)C	118	http://www.selleckchem.com/products/spiramycin.html
120	1320	L2000-17	e2	2	5	20170418	1	215	220		K15:20	A1:16, B:O7, B:O14, N1:6, O1:6	[1:20, 34:20:294, 27:20:287, 261:266, 281:286]	Nystatin (Fungicidin)	S1934	microbiology	Others	Others	926.09	1400-61-9	free base	Nystatin (Mycostatin) is a polyene antifungal agent to which many molds and yeasts are sensitive, including Candida spp.	[C@@H]1([C@H](C)[C@@H]([C@H](/C=C/C=C/CC/C=C/C=C/C=C/C=C/[C@@H](C[C@@H]2O[C@@](C[C@@H](O)[C@H](CC[C@@H](O)C[C@@H](O)C[C@@H](O)CC(=O)O1)O)(C[C@@H]([C@H]2C(=O)O)O)O)O[C@@H]3[C@@H]([C@@H]([C@H]([C@@H](O3)C)O)N)O)C)O)C	20	http://www.selleckchem.com/products/Nystatin(Mycostatin).html
121	1321	L2000-17	e3	3	5	20170418	1	195	200		J15:20	A1:16, B:O7, B:O14, N1:6, O1:6	[1:20, 34:20:294, 27:20:287, 261:266, 281:286]	Elvitegravir (GS-9137, JTK-303)	S2001	microbiology	Microbiology	Integrase	447.88	697761-98-1	free base	Elvitegravir (EVG, JTK-303/GS-9137) is an HIV integrase inhibitor for HIV-1 IIIB, HIV-2 EHO and HIV-2 ROD with IC50 of 0.7 nM, 2.8 nM and 1.4 nM, respectively.	C1=CC(=C(C(=C1)Cl)F)CC2=CC3=C(C=C2OC)N(C=C(C3=O)C(O)=O)[C@@H](C(C)C)CO	200	http://www.selleckchem.com/products/Elvitegravir.html
122	1322	L2000-17	e4	4	5	20170418	1	175	180		I15:20	A1:16, B:O7, B:O14, N1:6, O1:6	[1:20, 34:20:294, 27:20:287, 261:266, 281:286]	Artemether	S2264	microbiology	Others	Others	298.37	71963-77-4	free base	Artemether is an antimalarial for the treatment of resistant strains of falciparum malaria.	[C@]12([C@]34[C@@](CC[C@@]1(C)[H])([C@]([C@H](O[C@@](O[C@@](CC2)(OO3)C)4[H])OC)([H])C)[H])[H]	201	http://www.selleckchem.com/products/Artemether(SM-224).html
123	1323	L2000-17	e5	5	5	20170418	1	155	160		H15:20	A1:16, B:O7, B:O14, N1:6, O1:6	[1:20, 34:20:294, 27:20:287, 261:266, 281:286]	7-Aminocephalosporanic acid	S2530	microbiology	Others	Others	272.28	957-68-6	free base	7-Aminocephalosporanic acid is used for synthesis of cephalosporin antibiotics and intermediates.	N12[C@](SCC(=C1C(O)=O)COC(C)=O)([C@H](C2=O)N)[H]	10	http://www.selleckchem.com/products/7-Aminocephalosporanic-acid.html
124	1324	L2000-17	e6	6	5	20170418	1	135	140		G15:20	A1:16, B:O7, B:O14, N1:6, O1:6	[1:20, 34:20:294, 27:20:287, 261:266, 281:286]	Terbinafine HCl	S2557	microbiology	Others	Others	327.89	78628-80-5	hydrochloride	Terbinafine hydrochloride (Lamisil) is a hydrochloride salt of terbinafine that is a synthetic allylamine antifungal and a squalene epoxidase inhibitor with an IC50 of 30 nM for Candida albicans.	C1(=CC2=C(C=C1)C(=CC=C2)CN(C/C=C/C#CC(C)(C)C)C).Cl	201	www.selleckchem.com/products/Terbinafine-hydrochloride(Zabel).html
125	1325	L2000-17	e7	7	5	20170418	1	115	120		F15:20	A1:16, B:O7, B:O14, N1:6, O1:6	[1:20, 34:20:294, 27:20:287, 261:266, 281:286]	Oseltamivir phosphate	S2597	microbiology	Others	Others	410.4	204255-11-8	phosphate	Oseltamivir phosphate (Tamiflu) is a competitive neuraminidase inhibitor.	[C@@H]1([C@@H]([C@H](CC(=C1)C(OCC)=O)N)NC(C)=O)OC(CC)CC.P(=O)(=O)OO.[HH]	10	http://www.selleckchem.com/products/oseltamivir-phosphate-Tamiflu.html
126	1326	L2000-17	e8	8	5	20170418	1	95	100		E15:20	A1:16, B:O7, B:O14, N1:6, O1:6	[1:20, 34:20:294, 27:20:287, 261:266, 281:286]	Enrofloxacin	S3059	microbiology	Others	Others	359.39	93106-60-6	free base	Enrofloxacin is a fluoroquinolone antibiotic.	N1(C=C(C(C2C=C(C(=CC1=2)N3CCN(CC3)CC)F)=O)C(=O)O)C4CC4	10	http://www.selleckchem.com/products/enrofloxacin.html
127	1327	L2000-17	e9	9	5	20170418	1	75	80		D15:20	A1:16, B:O7, B:O14, N1:6, O1:6	[1:20, 34:20:294, 27:20:287, 261:266, 281:286]	Butenafine HCl	S3154	microbiology	Others	Others	353.93	101827-46-7	hydrochloride	Butenafine HCl is a synthetic benzylamine antifungal, works by inhibiting the synthesis of sterols by inhibiting squalene epoxidase.	C1(C=CC=C2C=CC=CC=12)CN(C)CC3(C=CC(=CC=3)C(C)(C)C).Cl	197	http://www.selleckchem.com/products/butenafine-hydrochloride.html
128	1328	L2000-17	e10	10	5	20170418	1	55	60		C15:20	A1:16, B:O7, B:O14, N1:6, O1:6	[1:20, 34:20:294, 27:20:287, 261:266, 281:286]	Nafcillin Sodium	S4042	microbiology	Others	Others	454.47	7177-50-6	free base	Nafcillin sodium reversibly inhibits β-lactamase with Kd of 33 mM.	C12(=C(C=CC(=C1C(N[C@@H]3C(N4[C@@]3(SC([C@H]4C(=O)O[Na])(C)C)[H])=O)=O)OCC)C=CC=C2).O	200	http://www.selleckchem.com/products/nafcillin-sodium.html
129	1329	L2000-17	e11	11	5	20170418	1	35	40		B15:20	A1:16, B:O7, B:O14, N1:6, O1:6	[1:20, 34:20:294, 27:20:287, 261:266, 281:286]	Closantel Sodium	S4105	microbiology	Others	Others	685.06	61438-64-0	free base	Closantel is gram positive antibacterial activity inhibitor, inhibiting the KinA/Spo0F system with IC50 of 3.8 μM.	C1(C(C2=CC=C(C=C2)Cl)C#N)(C(=CC(=C(C=1)C)NC(C3C(=C(C=C(C=3)I)I)[O-])=O)Cl).[Na+]	10	http://www.selleckchem.com/products/closantel-sodium.html
130	1330	L2000-17	f2	2	6	20170418	1	208	213		K8:13	A1:16, B:O7, B:O14, N1:6, O1:6	[1:20, 34:20:294, 27:20:287, 261:266, 281:286]	Isoniazid	S1937	microbiology	Others	Others	137.14	54-85-3	free base	Isoniazid is a prodrug and must be activated by bacterial catalase.	C1=CN=CC=C1C(NN)=O	196	http://www.selleckchem.com/products/Isoniazid(Tubizid).html
131	1331	L2000-17	f3	3	6	20170418	1	188	193		J8:13	A1:16, B:O7, B:O14, N1:6, O1:6	[1:20, 34:20:294, 27:20:287, 261:266, 281:286]	Raltegravir (MK-0518)	S2005	microbiology	Microbiology	Integrase	444.42	518048-05-0	free base	Raltegravir (MK-0518) is a potent integrase (IN) inhibitor for WT and S217Q PFV IN with IC50 of 90 nM and 40 nM, respectively.	N1(C(=NC(=C(C1=O)O)C(NCC2=CC=C(C=C2)F)=O)C(NC(C3=NN=C(O3)C)=O)(C)C)C	200	http://www.selleckchem.com/products/Raltegravir-(MK-0518).html
132	1332	L2000-17	f4	4	6	20170418	1	168	173		I8:13	A1:16, B:O7, B:O14, N1:6, O1:6	[1:20, 34:20:294, 27:20:287, 261:266, 281:286]	Nalidixic acid	S2328	microbiology	Others	Others	232.24	389-08-2	free base	Nalidixic acid(NegGram) is a synthetic 1,8-naphthyridine antimicrobial agent with a limited bacteriocidal spectrum. It is an inhibitor of the A subunit of bacterial DNA gyrase.	C1=C(C(C2=C(N1CC)N=C(C=C2)C)=O)C(O)=O	25	http://www.selleckchem.com/products/Nalidixic-acid(NegGram).html
133	1333	L2000-17	f5	5	6	20170418	1	148	153		H8:13	A1:16, B:O7, B:O14, N1:6, O1:6	[1:20, 34:20:294, 27:20:287, 261:266, 281:286]	Isoconazole nitrate	S2534	microbiology	Others	Others	479.14	24168-96-5	nitrate	Isoconazole nitrate (Travogen) is an azole antifungal reagent.	C1(=C(C=C(C(=C1)C(OCC2=C(C=CC=C2Cl)Cl)CN3C=CN=C3)Cl)Cl).[N+]([O-])(=O)O	85	http://www.selleckchem.com/products/Isoconazole-nitrate-Travogen.html
134	1334	L2000-17	f6	6	6	20170418	1	128	133		G8:13	A1:16, B:O7, B:O14, N1:6, O1:6	[1:20, 34:20:294, 27:20:287, 261:266, 281:286]	Cloxacillin Sodium	S2564	microbiology	Others	Others	475.88	7081-44-9	sodium	Cloxacillin Sodium is a sodium salt of cloxacillin that is a penicillinase-resistant, acid resistant, semi-synthetic penicillin.	[C@H]1(C(N2[C@]1(SC([C@@H]2C(=O)[O-])(C)C)[H])=O)NC(=O)C3(=C(ON=C3C4=CC=CC=C4Cl)C).[Na+].O	115	http://www.selleckchem.com/products/Cloxacillin-sodium-Cloxacap.html
135	1335	L2000-17	f7	7	6	20170418	1	108	113		F8:13	A1:16, B:O7, B:O14, N1:6, O1:6	[1:20, 34:20:294, 27:20:287, 261:266, 281:286]	BMS-378806	S2632	microbiology	Others	gp120/CD4	406.43	357263-13-9	free base	BMS-378806 selectively inhibits the binding of HIV-1 gp120 to the CD4receptor with EC50 of 0.85-26.5 nM in virus.	C1=CNC2C(=C1OC)C(=CN=2)C(C(N3[C@@H](CN(CC3)C(=O)C4=CC=CC=C4)C)=O)=O	199	http://www.selleckchem.com/products/bms806.html
136	1336	L2000-17	f8	8	6	20170418	1	88	93		E8:13	A1:16, B:O7, B:O14, N1:6, O1:6	[1:20, 34:20:294, 27:20:287, 261:266, 281:286]	Etravirine (TMC125)	S3080	microbiology	Microbiology	Reverse Transcriptase	435.28	269055-15-4	free base	Etravirine (TMC125) is a non-nucleoside reverse transcriptase inhibitor (NNRTI) used for the treatment of HIV.	C1(N=C(N=C(C=1Br)N)NC2C=CC(C#N)=CC=2)OC3C(=CC(C#N)=CC=3C)C	96	http://www.selleckchem.com/products/etravirine-tmc125.html
137	1337	L2000-17	f9	9	6	20170418	1	68	73		D8:13	A1:16, B:O7, B:O14, N1:6, O1:6	[1:20, 34:20:294, 27:20:287, 261:266, 281:286]	Sertaconazole nitrate	S3161	microbiology	Others	Others	500.78	99592-39-9	nitrate	Sertaconazole nitrate is a topical broad-spectrum antifungal that is developed to provide an additional agent for the treatment of superficial cutaneous and mucosal infections.	C1(=NC=CN1CC(C2C(=CC(=CC=2)Cl)Cl)OCC3C4C(SC=3)=C(C=CC=4)Cl).[R]	199	http://www.selleckchem.com/products/sertaconazole-nitrate.html
138	1338	L2000-17	f10	10	6	20170418	1	48	53		C8:13	A1:16, B:O7, B:O14, N1:6, O1:6	[1:20, 34:20:294, 27:20:287, 261:266, 281:286]	Toltrazuril	S4044	microbiology	Others	Others	425.38	69004-03-1	free base	Toltrazuril is an antiprotozoal agent that acts upon Coccidia parasites.	C1=C(C=CC(=C1)SC(F)(F)F)OC2=C(C)C=C(C=C2)N3C(N(C(NC3=O)=O)C)=O	199	http://www.selleckchem.com/products/toltrazuril.html
139	1339	L2000-17	f11	11	6	20170418	1	28	33		B8:13	A1:16, B:O7, B:O14, N1:6, O1:6	[1:20, 34:20:294, 27:20:287, 261:266, 281:286]	Closantel	S4106	microbiology	Others	Others	663.07	57808-65-8	free base	Closantel is gram positive antibacterial activity inhibitor, inhibiting the KinA/Spo0F system with IC50 of 3.8 μM.	C1(C(C2=CC=C(C=C2)Cl)C#N)C(=CC(=C(C=1)C)NC(C3C(=C(C=C(C=3)I)I)O)=O)Cl	150	http://www.selleckchem.com/products/closantel.html
140	1340	L2000-17	g2	2	7	20170418	1	201	206		K1:6	A1:16, B:O7, B:O14, N1:6, O1:6	[1:20, 34:20:294, 27:20:287, 261:266, 281:286]	Levofloxacin	S1940	microbiology	Others	Others	361.37	100986-85-4	free base	Levofloxacin is a synthetic fluoroquinolone (fluoroquinolones) antibacterial agent.	C12=C3C=C(C(=C1OC[C@](N2C=C(C3=O)C(=O)O)(C)[H])N4CCN(CC4)C)F	66	http://www.selleckchem.com/products/Levofloxacin(Levaquin).html
141	1341	L2000-17	g3	3	7	20170418	1	181	186		J1:6	A1:16, B:O7, B:O14, N1:6, O1:6	[1:20, 34:20:294, 27:20:287, 261:266, 281:286]	Fenticonazole Nitrate	S2031	microbiology	Others	Others	518.41	73151-29-8	nitrate	Fenticonazole nitrate is an azole antifungal agent.	C(OCC1=CC=C(C=C1)SC2=CC=CC=C2)(C3=CC=C(C=C3Cl)Cl)CN4(C=CN=C4).[N+]([O-])(=O)O	200	http://www.selleckchem.com/products/fenticonazole-nitrate.html
142	1342	L2000-17	g4	4	7	20170418	1	161	166		I1:6	A1:16, B:O7, B:O14, N1:6, O1:6	[1:20, 34:20:294, 27:20:287, 261:266, 281:286]	Aloperine	S2420	microbiology	Others	Others	232.36	56293-29-9	free base	Aloperine is exhibits anti-inflammatory, antibacterial, antiviral, and anti-tumor properties.	C1CCC[C@]2(N1C[C@]3(C[C@@]2(C=C4[C@]3(NCCC4)[H])[H])[H])[H]	10	http://www.selleckchem.com/products/aloperine.html
143	1343	L2000-17	g5	5	7	20170418	1	141	146		H1:6	A1:16, B:O7, B:O14, N1:6, O1:6	[1:20, 34:20:294, 27:20:287, 261:266, 281:286]	Econazole nitrate	S2535	microbiology	Others	Others	444.7	24169-02-6	nitrate	Econazole nitrate (Spectazole) is an imidazole class antifungal medication.	C1(=C(C=C(C(=C1)C(CN2C=CN=C2)OCC3=CC=C(C=C3)Cl)Cl)Cl).[N+]([O-])(=O)O	200	http://www.selleckchem.com/products/Econazole-nitrate-Spectazole.html
144	1344	L2000-17	g6	6	7	20170418	1	121	126		G1:6	A1:16, B:O7, B:O14, N1:6, O1:6	[1:20, 34:20:294, 27:20:287, 261:266, 281:286]	Amoxicillin Sodium	S2565	microbiology	Others	Others	387.39	34642-77-8	sodium	Amoxicillin Sodium is a moderate- spectrum, bacteriolytic, β-lactam antibiotic.	C1(=CC=C(C=C1)[C@H](C(N[C@H]2[C@@]3(N(C2=O)[C@@H](C(S3)(C)C)C(=O)[O-])[H])=O)N)O.[Na+]	201	http://www.selleckchem.com/products/amoxicillin-(amox).html
145	1345	L2000-17	g7	7	7	20170418	1	101	106		F1:6	A1:16, B:O7, B:O14, N1:6, O1:6	[1:20, 34:20:294, 27:20:287, 261:266, 281:286]	Dolutegravir (GSK1349572)	S2667	microbiology	Microbiology	Integrase	419.38	1051375-16-6	free base	S/GSK1349572 (GSK1349572) is a two-metal-binding HIV integrase inhibitor with IC50 of 2.7 nM, modest activity against raltegravir-resistant signature mutants Y143R, Q148K, N155H, and G140S/Q148H. Phase 3.	C1(=CC(=C(C=C1)CNC(C2=CN3C(=C(C2=O)O)C(N4[C@](C3)(OCC[C@@H]4C)[H])=O)=O)F)F	200	http://www.selleckchem.com/products/s-gsk1349572.html
146	1346	L2000-17	g8	8	7	20170418	1	81	86		E1:6	A1:16, B:O7, B:O14, N1:6, O1:6	[1:20, 34:20:294, 27:20:287, 261:266, 281:286]	Nadifloxacin	S3105	microbiology	Others	Others	360.38	124858-35-1	free base	Nadifloxacin is a topical fluoroquinolone antibiotic for the treatment of acne vulgaris.	C12C(C(=CN3C(CCC(=C31)C(=C(C=2)F)N4CCC(CC4)O)C)C(=O)O)=O	55	http://www.selleckchem.com/products/nadifloxacin.html
147	1347	L2000-17	g9	9	7	20170418	1	61	66		D1:6	A1:16, B:O7, B:O14, N1:6, O1:6	[1:20, 34:20:294, 27:20:287, 261:266, 281:286]	Tylosin tartrate	S3162	microbiology	Others	Others	1066.19	74610-55-2	tartrate	Tylosin tartrate is a macrolide antibiotic approved for the control of mycoplasmosis in poultry.	[C@H]1([C@H](OC(C[C@H]([C@@H]([C@H]([C@H](C[C@H](C(/C=C/C(=C/1)C)=O)C)CC=O)O[C@@]2([C@@H]([C@H]([C@@H]([C@H](O2)C)O[C@@]3(O[C@H]([C@@H]([C@](C3)(C)O)O)C)[H])N(C)C)O)[H])C)O)=O)CC)CO[C@H]4([C@@H]([C@@H]([C@@H]([C@H](O4)C)O)OC)OC).C([C@@H]([C@H](C(=O)O)O)O)(=O)O	281	http://www.selleckchem.com/products/tylosin-tartrate.html
148	1348	L2000-17	g10	10	7	20170418	1	41	46		C1:6	A1:16, B:O7, B:O14, N1:6, O1:6	[1:20, 34:20:294, 27:20:287, 261:266, 281:286]	Valganciclovir HCl	S4050	microbiology	Others	Others	390.82	175865-59-5	hydrochloride	Valganciclovir HCl is a prodrug for ganciclovir with antiviral activity used to treat cytomegalovirus infections.	C(C)(C)[C@@H](C(OCC(CO)OCN1C=NC2C1N=C(NC2=O)N)=O)N.Cl	199	http://www.selleckchem.com/products/valganciclovir-hcl.html
149	1349	L2000-17	g11	11	7	20170418	1	21	26		B1:6	A1:16, B:O7, B:O14, N1:6, O1:6	[1:20, 34:20:294, 27:20:287, 261:266, 281:286]	Clofazimine	S4107	microbiology	Others	Others	473.4	2030-63-9	free base	Clofazimine is a rhimophenazine dye, originally developed for the treatment of tuberculosis, it has both antimicrobial and antiinflammatory activity, postulated mechanisms of action include intercalation of clofazimine with bacterial DNA and increasing levels of cellular phospholipase A2.	N1(C2C(=NC3=C1C=CC=C3)C=C(C(/C=2)=N\C(C)C)NC4=CC=C(C=C4)Cl)C5=CC=C(C=C5)Cl	10	http://www.selleckchem.com/products/clofazimine.html
150	1350	L2000-17	h2	2	8	20170418	1	295	300		O15:20	A1:16, B:O7, B:O14, N1:6, O1:6	[1:20, 34:20:294, 27:20:287, 261:266, 281:286]	Miconazole Nitrate	S1956	microbiology	Others	Others	479.14	22832-87-7	nitrate	Miconazole is an imidazole antifungal agent that is used topically and by intravenous infusion.	C1(=C(C=C(C(=C1)C(OCC2=CC=C(C=C2Cl)Cl)CN3C=CN=C3)Cl)Cl).O[N+](=O)[O-]	200	http://www.selleckchem.com/products/Miconazole-nitrate.html
151	1351	L2000-17	h3	3	8	20170418	1	275	280		M15:20	A1:16, B:O7, B:O14, N1:6, O1:6	[1:20, 34:20:294, 27:20:287, 261:266, 281:286]	Tolnaftate	S2058	microbiology	Others	Others	307.41	2398-96-1	free base	Tolnaftate is a synthetic thiocarbamate used as an anti-fungal agent.	C1(N(C(OC2=CC=C3C(=C2)C=CC=C3)=S)C)=CC(=CC=C1)C	201	http://www.selleckchem.com/products/tolnaftate.html
152	1352	L2000-17	h4	4	8	20170418	1	255	260		N15:20	A1:16, B:O7, B:O14, N1:6, O1:6	[1:20, 34:20:294, 27:20:287, 261:266, 281:286]	Fenbendazole	S2468	microbiology	Others	Others	299.35	43210-67-9	free base	Fenbendazole(Panacur) is a broad spectrum benzimidazole anthelmintic used against gastrointestinal parasites with an IC5 of about 0.01 μg/ml	C1=CC=C(C=C1)SC2=CC3=C(C=C2)N=C(N3)NC(OC)=O	13	http://www.selleckchem.com/products/Fenbendazole(Panacur).html
153	1353	L2000-17	h5	5	8	20170418	1	235	240		L15:20	A1:16, B:O7, B:O14, N1:6, O1:6	[1:20, 34:20:294, 27:20:287, 261:266, 281:286]	Miconazole	S2536	microbiology	Others	Others	416.13	22916-47-8	free base	Miconazole (Monistat) is an imidazole antifungal agent.	C1(=CC=C(C(=C1)Cl)COC(C2=C(C=C(C=C2)Cl)Cl)CN3C=CN=C3)Cl	199	http://www.selleckchem.com/products/Miconazole-Monistat.html
154	1354	L2000-17	h6	6	8	20170418	1	288	293		O8:13	A1:16, B:O7, B:O14, N1:6, O1:6	[1:20, 34:20:294, 27:20:287, 261:266, 281:286]	Streptomycin sulfate	S2572	microbiology	Others	Others	1457.38	3810-74-0	sulfate	Streptomycin sulfate is a sulfate salt of streptomycin that is a protein synthesis inhibitor.	S(=O)(=O)(O)O.S(=O)(=O)(O)O.S(=O)(=O)(O)O.[C@H]1([C@H]([C@]([C@H]([C@@H]([C@@H]1NC(N)=N)O)NC(=N)N)([H])O[C@H]2[C@H](O[C@@]3(O[C@@H]([C@@H]([C@H]([C@@H]3NC)O)O)CO)[H])[C@]([C@@H](O2)C)(O)C=O)O)O.[C@H]4([C@H]([C@]([C@H]([C@@H]([C@@H]4NC(N)=N)O)NC(=N)N)([H])O[C@H]5[C@H](O[C@@]6(O[C@@H]([C@@H]([C@H]([C@@H]6NC)O)O)CO)[H])[C@]([C@@H](O5)C)(O)C=O)O)O	200	http://www.selleckchem.com/products/streptomycin-sulfate.html
155	1355	L2000-17	h7	7	8	20170418	1	268	273		N8:13	A1:16, B:O7, B:O14, N1:6, O1:6	[1:20, 34:20:294, 27:20:287, 261:266, 281:286]	MK-2048	S2765	microbiology	Microbiology	Integrase	461.87	869901-69-9	free base	MK-2048 is a potent inhibitor of integrase (IN) and INR263K with IC50 of 2.6 nM and 1.5 nM, respectively.	N1N(C(C2=C(C=1C(=O)NC)N3C(=C2O)C(N(C[C@H]3C)CC)=O)=O)CC4=CC=C(C(=C4)Cl)F	19	http://www.selleckchem.com/products/mk-2048.html
156	1356	L2000-17	h8	8	8	20170418	1	248	253		M8:13	A1:16, B:O7, B:O14, N1:6, O1:6	[1:20, 34:20:294, 27:20:287, 261:266, 281:286]	Ornidazole	S3121	microbiology	Others	Others	219.63	16773-42-5	free base	Ornidazole is a 5-nitroimidazole derivative with antiprotozoal and antibacterial properties against anaerobic bacteria.	C1=C(N(C(=N1)C)CC(CCl)O)[N+](=O)[O-]	200	http://www.selleckchem.com/products/ornidazole.html
157	1357	L2000-17	h9	9	8	20170418	1	228	233		L8:13	A1:16, B:O7, B:O14, N1:6, O1:6	[1:20, 34:20:294, 27:20:287, 261:266, 281:286]	Ampicillin sodium	S3170	microbiology	Others	Others	371.39	69-52-3	sodium	Ampicillin is a beta-lactam antibiotic that is part of the aminopenicillin family.	N12([C@H](C(S[C@]([C@@H](C1=O)NC([C@@H](C3C=CC=CC=3)N)=O)2[H])(C)C)C(=O)[O-]).[Na+]	99	http://www.selleckchem.com/products/ampicillin-sodium.html
158	1358	L2000-17	h10	10	8	20170418	1	241	246		M1:6	A1:16, B:O7, B:O14, N1:6, O1:6	[1:20, 34:20:294, 27:20:287, 261:266, 281:286]	Retapamulin	S4056	microbiology	Others	Others	517.76	224452-66-8	free base	Retapamulin is a topical antibiotic, which binds to both E. coli and S. aureus ribosomes with similar potencies with Kd of 3 nM.	[C@]12(CC[C@@](N1C)(C[C@H](C2)SCC(O[C@@H]3C[C@]([C@H]([C@@H]([C@]45[C@]([C@@]3(C)[C@H](CC4)C)(C(CC5)=O)[H])C)O)(C)C=C)=O)[H])[H]	200	http://www.selleckchem.com/products/retapamulin.html
159	1359	L2000-17	h11	11	8	20170418	1	221	226		L1:6	A1:16, B:O7, B:O14, N1:6, O1:6	[1:20, 34:20:294, 27:20:287, 261:266, 281:286]	Dicloxacillin Sodium	S4111	microbiology	Others	Others	510.32	343-55-5	sodium	Dicloxacillin is a β-lactamase resistant penicillin similar to oxacillin and it has activity against gram-positive/negative aerobic and anaerobic bacteria.	C1(=C(C=CC=C1Cl)Cl)C2(=NOC(=C2C(N[C@@H]3C(N4[C@H]3SC([C@@H]4C(=O)O[Na])(C)C)=O)=O)C).O	195	http://www.selleckchem.com/products/dicloxacillin-sodium.html
160	1360	L2000-18	a2	2	1	20170420	0	215	220		K15:20	A1:16, B:O7, B:O14, N1:6, O1:6	[1:20, 34:20:294, 27:20:287, 261:266, 281:286]	Sulconazole Nitrate	S4120	microbiology	Others	Others	460.76	61318-91-0	nitrate	Sulconazole Nitrate is an imidazole derivative with broad-spectrum antifungal activity.	C1(=NC=CN1CC(C2C(=CC(=CC=2)Cl)Cl)SCC3C=CC(=CC=3)Cl).[N+](O)(=O)[O-]	199	https://www.selleckchem.com/products/sulconazole-nitrate.html
161	1361	L2000-18	a3	3	1	20170420	0	195	200		J15:20	A1:16, B:O7, B:O14, N1:6, O1:6	[1:20, 34:20:294, 27:20:287, 261:266, 281:286]	Sulfaguanidine	S4175	microbiology	Others	Others	214.24	57-67-0	free base	Sulfaguanidine is a sulfonamide used as an anti-infective agent.	C1(S(=O)(=O)NC(=N)N)=CC=C(C=C1)N	200	http://www.selleckchem.com/products/sulfaguanidine.html
162	1362	L2000-18	a4	4	1	20170420	0	175	180		I15:20	A1:16, B:O7, B:O14, N1:6, O1:6	[1:20, 34:20:294, 27:20:287, 261:266, 281:286]	Aminothiazole	S4198	microbiology	Others	Others	100.14	96-50-4	free base	Aminothiazole can be used as a thyroid inhibitor and it has antibacterial activity.	C1=CSC(=N1)N	199	http://www.selleckchem.com/products/aminothiazole.html
163	1363	L2000-18	a5	5	1	20170420	0	155	160		H15:20	A1:16, B:O7, B:O14, N1:6, O1:6	[1:20, 34:20:294, 27:20:287, 261:266, 281:286]	Tacrolimus (FK506)	S5003	microbiology	Others	Others	804.02	104987-11-3	free base	FK-506 is a 23-membered macrolide lactone, it reduces peptidyl-prolyl isomerase activity by binding to the immunophilin FKBP12 (FK506 binding protein) creating a new complex.	[C@H]1(C[C@@H](CC[C@@H]1O)/C=C(/[C@@H]2[C@@H]([C@@H](O)CC(=O)[C@H](CC=C)/C=C(/C[C@@H](C[C@@H]([C@H]3[C@H](C[C@H]([C@](C(C(N4[C@](C(O2)=O)(CCCC4)[H])=O)=O)(O3)O)C)OC)OC)C)C)C)C)OC	200	http://www.selleckchem.com/products/FK-506-(Tacrolimus).html
164	1364	L2000-18	a6	6	1	20170420	0	135	140		G15:20	A1:16, B:O7, B:O14, N1:6, O1:6	[1:20, 34:20:294, 27:20:287, 261:266, 281:286]	Candesartan	S1578	endocrine	Endocrinology & Hormones	RAAS	440.45	139481-59-7	free base	Candesartan is an angiotensin II receptor antagonist with IC50 of 0.26 nM.	C1(=CC=C(C=C1)C2=CC=CC=C2C3N=NNN=3)CN4C5=C(N=C4OCC)C=CC=C5C(O)=O	199	http://www.selleckchem.com/products/Candesartan(Atacand).html
165	1365	L2000-18	a7	7	1	20170420	0	115	120		F15:20	A1:16, B:O7, B:O14, N1:6, O1:6	[1:20, 34:20:294, 27:20:287, 261:266, 281:286]	Enalapril Maleate	S1941	endocrine	Endocrinology & Hormones	RAAS	492.52	76095-16-4	maleate	Enalapril Maleate, the active metabolite of enalapril, competes with angiotensin I for binding at the angiotensin-converting enzyme, blocking the conversion of angiotensin I to angiotensin II.	C1(=CC=CC(=C1)CC[C@H](N[C@H](C(N2[C@@H](CCC2)C(O)=O)=O)C)C(OCC)=O).C(O)(\C=C/C(=O)O)=O	201	http://www.selleckchem.com/products/Enalapril-maleate(Vasotec).html
166	1366	L2000-18	a8	8	1	20170420	0	95	100		E15:20	A1:16, B:O7, B:O14, N1:6, O1:6	[1:20, 34:20:294, 27:20:287, 261:266, 281:286]	GSK1292263	S2149	endocrine	Endocrinology & Hormones	GPR	456.56	1032823-75-8	free base	GSK1292263 is a novel GPR119 agonist, showing potential for the treatment of type 2 diabetes. Phase 2.	C1(C=CC(=CN=1)OCC2CCN(CC2)C3=NC(=NO3)C(C)C)C4C=CC(=CC=4)S(=O)(=O)C	74	http://www.selleckchem.com/products/GSK1292263.html
167	1367	L2000-18	a9	9	1	20170420	0	75	80		D15:20	A1:16, B:O7, B:O14, N1:6, O1:6	[1:20, 34:20:294, 27:20:287, 261:266, 281:286]	OC000459	S2822	endocrine	Endocrinology & Hormones	GPR	348.37	851723-84-7,950688-14-9(sodiumsalt)	free base	OC000459 is a potent and selective D prostanoid receptor 2 (DP2) antagonist with IC50 of 13 nM.	C1(=CC=C2C(=C1)C(=C(N2CC(O)=O)C)CC3=CC=C4C(=N3)C=CC=C4)F	11	http://www.selleckchem.com/products/oc000459.html
168	1368	L2000-18	a10	10	1	20170420	0	55	60		C15:20	A1:16, B:O7, B:O14, N1:6, O1:6	[1:20, 34:20:294, 27:20:287, 261:266, 281:286]	AZD1981	S7263	endocrine	Endocrinology & Hormones	GPR	388.87	802904-66-1	free base	AZD1981 is a potent, selective CRTh2 (DP2) receptor antagonist with IC50 of 4 nM, showing >1000-fold selectivity over more than 340 other enzymes and receptors, including DP1.	C1=CC(=C2C(=C1)N(C(=C2SC3=CC=C(C=C3)Cl)C)CC(=O)O)NC(C)=O	28	http://www.selleckchem.com/products/azd1981.html
169	1369	L2000-18	a11	11	1	20170420	0	35	40		B15:20	A1:16, B:O7, B:O14, N1:6, O1:6	[1:20, 34:20:294, 27:20:287, 261:266, 281:286]	Bumetanide	S1287	other	Others	Others	364.42	28395-03-1	free base	Bumetanide (Bumex) is a loop diuretic of the sulfamyl category to treat heart failure.	C1=C(C(=C(C=C1C(=O)O)NCCCC)OC2=CC=CC=C2)S(=O)(=O)N	200	http://www.selleckchem.com/products/Bumetanide.html
170	1370	L2000-18	b2	2	2	20170420	0	208	213		K8:13	A1:16, B:O7, B:O14, N1:6, O1:6	[1:20, 34:20:294, 27:20:287, 261:266, 281:286]	Tilmicosin	S4122	microbiology	Others	Others	869.13	108050-54-0	free base	Tilmicosin is a macrolide antibiotic.	[C@@H]1([C@@H](CCN2C[C@@H](C[C@H](C2)C)C)C[C@H](C(/C=C/C(=C/[C@H]([C@H](OC(C[C@H]([C@@H]1C)O)=O)CC)CO[C@H]3[C@@H]([C@@H]([C@@H]([C@@H](O3)C)O)OC)OC)C)=O)C)O[C@H]4[C@@H]([C@H]([C@@H]([C@@H](O4)C)O)N(C)C)O	115	https://www.selleckchem.com/products/tilmicosin.html
171	1371	L2000-18	b3	3	2	20170420	0	188	193		J8:13	A1:16, B:O7, B:O14, N1:6, O1:6	[1:20, 34:20:294, 27:20:287, 261:266, 281:286]	Climbazole	S4178	microbiology	Others	Others	292.76	38083-17-9	free base	Climbazole is a broad-spectrum imidazole antifungal agent that can provide anti-dandruff benefits.	C(N1C=CN=C1)(OC2=CC=C(C=C2)Cl)C(C(C)(C)C)=O	201	http://www.selleckchem.com/products/climbazole.html
172	1372	L2000-18	b4	4	2	20170420	0	168	173		I8:13	A1:16, B:O7, B:O14, N1:6, O1:6	[1:20, 34:20:294, 27:20:287, 261:266, 281:286]	Florfenicol	S4201	microbiology	Others	Others	358.21	73231-34-2	free base	Florfenicol is a fluorinated synthetic analog of thiamphenicol with broad-spectrum, primarily bacteriostatic activity.	C1(=CC=C(C=C1)[C@H]([C@H](NC(C(Cl)Cl)=O)CF)O)S(C)(=O)=O	200	http://www.selleckchem.com/products/florfenicol.html
173	1373	L2000-18	b5	5	2	20170420	0	148	153		H8:13	A1:16, B:O7, B:O14, N1:6, O1:6	[1:20, 34:20:294, 27:20:287, 261:266, 281:286]	Rilpivirine	S7303	microbiology	Microbiology	Reverse Transcriptase	366.42	500287-72-9	free base	Rilpivirine is a non-nucleoside reverse transcriptase inhibitor (NNRTI), and used to treat HIV-1 infection.	N1C(=NC=CC=1NC2=C(C=C(C=C2C)/C=C/C#N)C)NC3=CC=C(C#N)C=C3	199	http://www.selleckchem.com/products/rilpivirine.html
174	1374	L2000-18	b6	6	2	20170420	0	128	133		G8:13	A1:16, B:O7, B:O14, N1:6, O1:6	[1:20, 34:20:294, 27:20:287, 261:266, 281:286]	Olmesartan Medoxomil	S1604	endocrine	Endocrinology & Hormones	RAAS	558.59	144689-63-4	free base	Olmesartan medoxomil is a compound which is hydrolyzed to olmesartan that is a selective AT1 subtype angiotensin II receptor antagonist.	N1(CC2=CC=C(C=C2)C3=CC=CC=C3C4=NNN=N4)C(=NC(=C1C(OCC5OC(OC=5C)=O)=O)C(O)(C)C)CCC	159	http://www.selleckchem.com/products/olmesartan-medoxomil-Benicar.html
175	1375	L2000-18	b7	7	2	20170420	0	108	113		F8:13	A1:16, B:O7, B:O14, N1:6, O1:6	[1:20, 34:20:294, 27:20:287, 261:266, 281:286]	Candesartan Cilexetil	S2037	endocrine	Endocrinology & Hormones	RAAS	610.66	145040-37-5	free base	Candesartan Cilexetil is a specific nonpeptide Ang II receptor (ATR) antagonist and the prodrug of candesartan which is an ATR antagonist with an IC50 of 15 μg/kg	C1CCCC(C1)OC(OC(OC(=O)C2=CC=CC3=C2N(C(=N3)OCC)CC4=CC=C(C=C4)C5=C(C=CC=C5)C6=NN=NN6)C)=O	199	http://www.selleckchem.com/products/Candesartan-cilexetil-Atacand.html
176	1376	L2000-18	b8	8	2	20170420	0	88	93		E8:13	A1:16, B:O7, B:O14, N1:6, O1:6	[1:20, 34:20:294, 27:20:287, 261:266, 281:286]	Rosuvastatin Calcium	S2169	endocrine	Endocrinology & Hormones	RAAS	500.57	147098-20-2	free base	Rosuvastatin Calcium is a competitive inhibitor of HMG-CoA reductase with IC50 of 11 nM.	[Ca+2].N1(=C(N=C(C(=C1C(C)C)C=C[C@@H](O)C[C@H](CC([O-])=O)O)C2=CC=C(C=C2)F)N(S(C)(=O)=O)C).N3=C(N=C(C(=C3C(C)C)C=C[C@@H](O)C[C@H](CC([O-])=O)O)C4=CC=C(C=C4)F)N(S(C)(=O)=O)C	199	http://www.selleckchem.com/products/Rosuvastatin-calcium(Crestor).html
177	1377	L2000-18	b9	9	2	20170420	0	68	73		D8:13	A1:16, B:O7, B:O14, N1:6, O1:6	[1:20, 34:20:294, 27:20:287, 261:266, 281:286]	Epiandrosterone	S2832	endocrine	Endocrinology & Hormones	Androgen Receptor,Estrogen/progestogen Receptor	290.44	481-29-8	free base	Epiandrosterone is a steroid hormone with weak androgenic activity, is a natural metabolite of DHEA.	C1[C@@H](C[C@]2([C@](C1)([C@]3([C@@](CC2)([C@]4([C@](CC3)(C(CC4)=O)C)[H])[H])[H])C)[H])O	199	http://www.selleckchem.com/products/epiandrosterone-3beta-androsterone.html
178	1378	L2000-18	b10	10	2	20170420	0	48	53		C8:13	A1:16, B:O7, B:O14, N1:6, O1:6	[1:20, 34:20:294, 27:20:287, 261:266, 281:286]	Melatonin	S1204	other	Others	Others	232.28	73-31-4	free base	Melatonin is a hormone produced in the brain by the pineal gland from the amino acid tryptophan.	C1=CC(=CC2=C1NC=C2CCNC(=O)C)OC	202	http://www.selleckchem.com/products/Melatonin.html
179	1379	L2000-18	b11	11	2	20170420	0	28	33		B8:13	A1:16, B:O7, B:O14, N1:6, O1:6	[1:20, 34:20:294, 27:20:287, 261:266, 281:286]	Edaravone	S1326	other	Others	Others	174.2	89-25-8	free base	Edaravone, a strong novel free radical scavenger, is used for treatment of patients with acute brain infarction.	C1(CC(N(N=1)C2=CC=CC=C2)=O)C	200	http://www.selleckchem.com/products/Edaravone.html
180	1380	L2000-18	c2	2	3	20170420	0	201	206		K1:6	A1:16, B:O7, B:O14, N1:6, O1:6	[1:20, 34:20:294, 27:20:287, 261:266, 281:286]	Bacitracin	S4146	microbiology	Others	Others	1408.67	1405-87-4	free base	Bacitracin is a mixture of related cyclic polypeptides produced by organisms of the licheniformis group of <i>Bacillus subtilis var</i> Tracy, which disrupts both gram positive and gram negative bacteria by interfering with cell wall and peptidoglycan synthesis.	C(C)(C)[C@H](C1SC(CN=1)C(N[C@H](C(=O)N[C@H](C(N[C@H](C(=O)N[C@H]2C(N[C@@H](C(=O)N[C@H](C(=O)N[C@H](C(N[C@H](C(=O)N[C@H](C(N[C@H](C(NCCCC2)=O)CC(=O)N)=O)CC(=O)O)CC3N=CNC=3)=O)CC4=CC=CC=C4)[C@@H](CC)C)CCCN)=O)[C@H](C)CC)=O)CCC(O)=O)CC(C)C)=O)N	70	http://www.selleckchem.com/products/bacitracin.html
181	1381	L2000-18	c3	3	3	20170420	0	181	186		J1:6	A1:16, B:O7, B:O14, N1:6, O1:6	[1:20, 34:20:294, 27:20:287, 261:266, 281:286]	Mezlocillin Sodium	S4179	microbiology	Others	Others	561.56	42057-22-7	sodium	Mezlocillin sodium is a penicillin beta-lactam antibiotic used in the treatment of bacterial infections caused by susceptible, usually gram-positive, organisms.	N1(C(N(CC1)C(=O)N[C@H](C(=O)N[C@@H]2[C@]3(N(C2=O)[C@H](C(S3)(C)C)C([O-])=O)[H])C4=CC=CC=C4)=O)S(=O)(=O)C.[Na+]	178	http://www.selleckchem.com/products/mezlocillin-sodium.html
182	1382	L2000-18	c4	4	3	20170420	0	161	166		I1:6	A1:16, B:O7, B:O14, N1:6, O1:6	[1:20, 34:20:294, 27:20:287, 261:266, 281:286]	Furaltadone HCl	S4203	microbiology	Others	Others	360.75	3759-92-0	hydrochloride	Furaltadone HCl is an antibacterial and has distinct curative effect in the treatment of coccidiosis.	C1(CN(CCO1)CC2OC(N(C2)/N=C/C3OC(=CC=3)[N+](=O)[O-])=O).Cl	47	http://www.selleckchem.com/products/furaltadone-hcl.html
183	1383	L2000-18	c5	5	3	20170420	0	141	146		H1:6	A1:16, B:O7, B:O14, N1:6, O1:6	[1:20, 34:20:294, 27:20:287, 261:266, 281:286]	Finasteride	S1197	endocrine	Endocrinology & Hormones	5-alpha Reductase	372.54	98319-26-7	free base	Finasteride is an inhibitor of steroid Type II 5α-reductase.	C1C(N[C@]2([C@](C=1)([C@]3([C@@](CC2)([C@]4([C@](CC3)([C@@H](CC4)C(NC(C)(C)C)=O)C)[H])[H])[H])C)[H])=O	201	http://www.selleckchem.com/products/Finasteride.html
184	1384	L2000-18	c6	6	3	20170420	0	121	126		G1:6	A1:16, B:O7, B:O14, N1:6, O1:6	[1:20, 34:20:294, 27:20:287, 261:266, 281:286]	Ethinyl Estradiol	S1625	endocrine	Others	Others	296.4	57-63-6	free base	Ethynyl estradiol is an orally bio-active estrogen used in almost all modern formulations of combined oral contraceptive pills.	C1=C(C=C2C(=C1)[C@]3([C@@](CC2)([C@]4([C@](CC3)([C@@](CC4)(O)C#C)C)[H])[H])[H])O	199	http://www.selleckchem.com/products/Ethinyl-Estradiol.html
185	1385	L2000-18	c7	7	3	20170420	0	101	106		F1:6	A1:16, B:O7, B:O14, N1:6, O1:6	[1:20, 34:20:294, 27:20:287, 261:266, 281:286]	Cyproterone Acetate	S2042	endocrine	Endocrinology & Hormones	Androgen Receptor	416.94	427-51-0	acetate	Cyproterone acetate is an androgen receptor (AR) antagonist with IC50 of 7.1 nM, as well as a weak progesterone receptor agonist with weak pro-gestational and glucocorticoid activity.	[C@H]12C(C=C3[C@]([C@@H]1C2)([C@]4([C@@](C=C3Cl)([C@]5([C@](CC4)([C@@](CC5)(C(=O)C)OC(C)=O)C)[H])[H])[H])C)=O	199	http://www.selleckchem.com/products/cyproterone-acetate.html
186	1386	L2000-18	c8	8	3	20170420	0	81	86		E1:6	A1:16, B:O7, B:O14, N1:6, O1:6	[1:20, 34:20:294, 27:20:287, 261:266, 281:286]	Aliskiren Hemifumarate	S2199	endocrine	Endocrinology & Hormones	RAAS	609.83	173334-58-2	fumarate	Aliskiren hemifumarate is a direct renin inhibitor with IC50 of 1.5 nM.	C(/C=C/C(O)=O)(O)=O.C1(=C(C=C(C=C1)C[C@@H](C[C@@H]([C@H](C[C@H](C(NCC(C(N)=O)(C)C)=O)C(C)C)O)N)C(C)C)OCCCOC)OC.C2(=C(C=C(C=C2)C[C@@H](C[C@@H]([C@H](C[C@H](C(NCC(C(N)=O)(C)C)=O)C(C)C)O)N)C(C)C)OCCCOC)OC	163	http://www.selleckchem.com/products/Aliskiren-hemifumarate.html
187	1387	L2000-18	c9	9	3	20170420	0	61	66		D1:6	A1:16, B:O7, B:O14, N1:6, O1:6	[1:20, 34:20:294, 27:20:287, 261:266, 281:286]	ARN-509	S2840	endocrine	Endocrinology & Hormones	Androgen Receptor	477.43	956104-40-8	free base	ARN-509 is a selective and competitive androgen receptor inhibitor with IC50 of 16 nM, useful for prostate cancer treatment. Phase 2.	S=C1N(C(C2(N1C3=CC=C(C(=C3)F)C(NC)=O)CCC2)=O)C4=CN=C(C(=C4)C(F)(F)F)C#N	37	http://www.selleckchem.com/products/arn-509.html
188	1388	L2000-18	c10	10	3	20170420	0	41	46		C1:6	A1:16, B:O7, B:O14, N1:6, O1:6	[1:20, 34:20:294, 27:20:287, 261:266, 281:286]	Dexrazoxane HCl (ICRF-187, ADR-529)	S1222	other	Others	Others	304.73	149003-01-0	hydrochloride	A cardioprotective agent	N1(C(CN(CC1=O)C[C@@H](N2CC(NC(C2)=O)=O)C)=O).Cl	200	http://www.selleckchem.com/products/Dexrazoxane-Hydrochloride.html
189	1389	L2000-18	c11	11	3	20170420	0	21	26		B1:6	A1:16, B:O7, B:O14, N1:6, O1:6	[1:20, 34:20:294, 27:20:287, 261:266, 281:286]	Felbamate	S1330	other	Others	Others	238.24	25451-15-4	free base	Felbamate (Felbatol) is an anticonvulsant drug used in the treatment of epilepsy.	C1=CC=CC=C1C(COC(N)=O)COC(N)=O	201	http://www.selleckchem.com/products/Felbamate.html
190	1390	L2000-18	d2	2	4	20170420	0	295	300		O15:20	A1:16, B:O7, B:O14, N1:6, O1:6	[1:20, 34:20:294, 27:20:287, 261:266, 281:286]	Ampicillin Trihydrate	S4148	microbiology	Others	Others	403.45	7177-48-2	free base	Ampicillin Trihydrate is a β-lactam antibiotic, which inhibits bacterial cell-wall synthesis (peptidoglycan cross-linking) by inactivating transpeptidases on the inner surface of the bacterial cell membrane.	C1(=CC=C(C=C1)[C@H](C(N[C@@H]2C(N3[C@]2(SC([C@@H]3C(O)=O)(C)C)[H])=O)=O)N).O.O.O	200	http://www.selleckchem.com/products/ampicillin-trihydrate.html
191	1391	L2000-18	d3	3	4	20170420	0	275	280		M15:20	A1:16, B:O7, B:O14, N1:6, O1:6	[1:20, 34:20:294, 27:20:287, 261:266, 281:286]	Paromomycin Sulfate	S4183	microbiology			713.71	1263-89-4		Paromomycin Sulfate is an aminoglycoside antibioticis inhibiting protein synthesis in non-resistant cells by binding to 16S ribosomal RNA.	[C@@H]1([C@@H]([C@H]([C@H](O[C@H]1CO)O[C@]2([C@@H]([C@H]([C@@H](C[C@H]2N)N)O)O[C@]3([C@@H]([C@@H]([C@H](O3)CO)O[C@@]4([C@@H]([C@H]([C@@H]([C@@H](O4)CN)O)O)N)[H])O)[H])[H])N)O)O.S(=O)(=O)(O)O
192	1392	L2000-18	d4	4	4	20170420	0	255	260		N15:20	A1:16, B:O7, B:O14, N1:6, O1:6	[1:20, 34:20:294, 27:20:287, 261:266, 281:286]	Dirithromycin	S4213	microbiology	Others	Others	835.07	62013-04-1	free base	Dirithromycin is a macrolide glycopeptide antibiotic by binding to the 50S subunit of the 70S bacterial ribosome to inhibit the translocation of peptides.	C1[C@@H]([C@H]([C@@H](O[C@H]1C)O[C@H]2[C@@](C[C@H]([C@@]3(N[C@H](OC([C@@]([C@@H](OC([C@H]([C@H]([C@H]2C)O[C@@H]4O[C@H]([C@@H]([C@@](C4)(OC)C)O)C)C)=O)CC)(O)C)([C@@H]3C)[H])COCCOC)[H])C)(C)O)O)N(C)C	13	http://www.selleckchem.com/products/dirithromycin.html
193	1393	L2000-18	d5	5	4	20170420	0	235	240		L15:20	A1:16, B:O7, B:O14, N1:6, O1:6	[1:20, 34:20:294, 27:20:287, 261:266, 281:286]	Dutasteride	S1202	endocrine	Endocrinology & Hormones	5-alpha Reductase	528.53	164656-23-9	free base	Dutasteride is a dual 5-α reductase inhibitor that inhibits conversion of testosterone to dihydrotestosterone (DHT).	C1C(N[C@]2([C@](C=1)([C@]3([C@@](CC2)([C@]4([C@](CC3)([C@@H](CC4)C(NC5=CC(=CC=C5C(F)(F)F)C(F)(F)F)=O)C)[H])[H])[H])C)[H])=O	117	http://www.selleckchem.com/products/Dutasteride.html
194	1394	L2000-18	d6	6	4	20170420	0	288	293		O8:13	A1:16, B:O7, B:O14, N1:6, O1:6	[1:20, 34:20:294, 27:20:287, 261:266, 281:286]	Enalaprilat Dihydrate	S1657	endocrine	Endocrinology & Hormones	RAAS	348.4	84680-54-6	dihydrate	Enalaprilat is an angiotensin-converting enzyme (ACE) inhibitor with IC50 of 1.94 nM.	C1(=CC=CC(=C1)CC[C@@H](C(O)=O)N[C@H](C(N2[C@@H](CCC2)C(=O)O)=O)C).O.O	200	http://www.selleckchem.com/products/Enalaprilat.html
195	1395	L2000-18	d7	7	4	20170420	0	268	273		N8:13	A1:16, B:O7, B:O14, N1:6, O1:6	[1:20, 34:20:294, 27:20:287, 261:266, 281:286]	Captopril	S2051	endocrine	Endocrinology & Hormones	RAAS	217.29	62571-86-2	free base	Captopril is an angiotensin-converting enzyme (ACE) inhibitor with IC50 of 6 nM.	C([C@@H]1N(CCC1)C([C@@H](CS)C)=O)(=O)O	197	http://www.selleckchem.com/products/captopril-capoten.html
196	1396	L2000-18	d8	8	4	20170420	0	248	253		M8:13	A1:16, B:O7, B:O14, N1:6, O1:6	[1:20, 34:20:294, 27:20:287, 261:266, 281:286]	Quinapril HCl	S2581	endocrine	Endocrinology & Hormones	RAAS	474.98	82586-55-8	hydrochloride	Quinapril hydrochloride (Accupril) is the hydrochloride salt of quinapril that is an angiotensin-converting enzyme inhibitor with a Ki of 20 μM.	C1(=CC=CC(=C1)CC[C@H](N[C@H](C(N2[C@@H](CC3=C(C2)C=CC=C3)C(O)=O)=O)C)C(OCC)=O).Cl	37	http://www.selleckchem.com/products/quinapril-hydrochloride-accupril.html
197	1397	L2000-18	d9	9	4	20170420	0	228	233		L8:13	A1:16, B:O7, B:O14, N1:6, O1:6	[1:20, 34:20:294, 27:20:287, 261:266, 281:286]	Azilsartan	S3046	endocrine	Endocrinology & Hormones	RAAS	456.45	147403-03-0	free base	Azilsartan is an angiotensin II type 1 (AT1) receptor antagonist with IC50 of 2.6 nM.	C1(=NC2C(N1CC3C=CC(=CC=3)C4C(=CC=CC=4)C5NOC(N=5)=O)=C(C=CC=2)C(=O)O)OCC	199	http://www.selleckchem.com/products/azilsartan-tak-536.html
198	1398	L2000-18	d10	10	4	20170420	0	241	246		M1:6	A1:16, B:O7, B:O14, N1:6, O1:6	[1:20, 34:20:294, 27:20:287, 261:266, 281:286]	Leflunomide	S1247	other	Others	Others	270.21	75706-12-6	free base	Leflunomide is an immunosuppressant agent. Its active metabolite is Teriflunomide.	C1(=CC=C(C=C1)C(F)(F)F)NC(C2C=NOC=2C)=O	199	http://www.selleckchem.com/products/Leflunomide.html
199	1399	L2000-18	d11	11	4	20170420	0	221	226		L1:6	A1:16, B:O7, B:O14, N1:6, O1:6	[1:20, 34:20:294, 27:20:287, 261:266, 281:286]	Ginkgolide B	S1343	other	Others	PAFR	424.4	15291-77-7	free base	Ginkgolide B is a PAFR antagonist with IC50 of 3.6 μM.	C123[C@@H]([C@]4([C@@]([C@]51O[C@]6(C2([C@@H](C[C@@H]3OC5=O)C(C)(C)C)[C@@H](C(O6)=O)O)[H])([C@H](C(O4)=O)C)O)[H])O	200	http://www.selleckchem.com/products/Ginkgolide-B.html
200	1400	L2000-18	e2	2	5	20170420	1	215	220		K15:20	A1:16, B:O7, B:O14, N1:6, O1:6	[1:20, 34:20:294, 27:20:287, 261:266, 281:286]	Orbifloxacin	S4150	microbiology			395.38	113617-63-3		Orbifloxacin is a synthetic broad-spectrum fluoroquinolone antibiotic.	C12=C(C(C(=CN1C3CC3)C(O)=O)=O)C(=C(C(=C2F)N4C[C@H](N[C@@H](C4)C)C)F)F
201	1401	L2000-18	e3	3	5	20170420	1	195	200		J15:20	A1:16, B:O7, B:O14, N1:6, O1:6	[1:20, 34:20:294, 27:20:287, 261:266, 281:286]	Penciclovir	S4184	microbiology	Others	Others	253.26	39809-25-1	free base	Penciclovir is a purine acyclic nucleoside analogue with potent antiviral activity.	N1=C(NC2=C(C1=O)N=CN2CCC(CO)CO)N	134	http://www.selleckchem.com/products/penciclovir.html
202	1402	L2000-18	e4	4	5	20170420	1	175	180		I15:20	A1:16, B:O7, B:O14, N1:6, O1:6	[1:20, 34:20:294, 27:20:287, 261:266, 281:286]	Valnemulin HCl	S4216	microbiology	Others	Others	601.28	133868-46-9	hydrochloride	Valnemulin HCl is a broad-spectrum bacteriostatic agent inhibiting protein synthesis in bacteria by binding to the peptidyl transferase component of the 50S subunit of ribosomes.	[C@]12([C@]3([C@H]([C@@H]([C@@](C[C@H]([C@@]1(C)[C@@H](CC3)C)OC(CSC(C)(CNC([C@@H](C(C)C)N)=O)C)=O)(C=C)C)O)C)CCC2=O)[H].Cl	166	http://www.selleckchem.com/products/valnemulin-hcl.html
203	1403	L2000-18	e5	5	5	20170420	1	155	160		H15:20	A1:16, B:O7, B:O14, N1:6, O1:6	[1:20, 34:20:294, 27:20:287, 261:266, 281:286]	Benazepril HCl	S1284	endocrine	Endocrinology & Hormones	RAAS	460.95	86541-74-4	hydrochloride	Benazepril is a medication used to treat high blood pressure.	N1(C([C@H](CCC2=C1C=CC=C2)N[C@H](C(OCC)=O)CCC3=CC=CC=C3)=O)CC(O)=O.Cl	199	http://www.selleckchem.com/products/Benazepril-hydrochloride.html
204	1404	L2000-18	e6	6	5	20170420	1	135	140		G15:20	A1:16, B:O7, B:O14, N1:6, O1:6	[1:20, 34:20:294, 27:20:287, 261:266, 281:286]	Levonorgestrel	S1727	endocrine	Others	Others	312.45	797-63-7	free base	Levonorgestrel(Levonelle) is a synthetic progestogen used as an active ingredient in some hormonal contraceptives.	C1C(C=C2[C@](C1)([C@]3([C@@](CC2)([C@]4([C@](CC3)([C@@](CC4)(O)C#C)CC)[H])[H])[H])[H])=O	144	http://www.selleckchem.com/products/Levonorgestrel(Levonelle).html
205	1405	L2000-18	e7	7	5	20170420	1	115	120		F15:20	A1:16, B:O7, B:O14, N1:6, O1:6	[1:20, 34:20:294, 27:20:287, 261:266, 281:286]	Moexipril HCl	S2079	endocrine	Endocrinology & Hormones	RAAS	535.03	82586-52-5	hydrochloride	Moexipril HCl is a potent orally active non-sulfhydryl angiotensin converting enzyme inhibitor (ACE) with IC50 of 0.041 μM, which is used for the treatment of hypertension and congestive heart failure.	C1(=C(C=C2C(=C1)C[C@H](N(C2)C(=O)[C@H](C)N[C@H](C(=O)OCC)CCC3=CC=CC=C3)C(O)=O)OC)OC.Cl	37	http://www.selleckchem.com/products/moexipril-hydrochloride.html
206	1406	L2000-18	e8	8	5	20170420	1	95	100		E15:20	A1:16, B:O7, B:O14, N1:6, O1:6	[1:20, 34:20:294, 27:20:287, 261:266, 281:286]	Dehydroepiandrosterone (DHEA)	S2604	endocrine	Endocrinology & Hormones	Androgen Receptor	288.43	53-43-0	free base	Dehydroepiandrosterone(DHEA) is a 19-carbon endogenous natural steroid hormone.Phase 3.	C1[C@@H](CC2[C@](C1)([C@]3([C@@](CC=2)([C@]4([C@](CC3)(C(CC4)=O)C)[H])[H])[H])C)O	10	http://www.selleckchem.com/products/Dehydroepiandrosterone(DHEA).html
207	1407	L2000-18	e9	9	5	20170420	1	75	80		D15:20	A1:16, B:O7, B:O14, N1:6, O1:6	[1:20, 34:20:294, 27:20:287, 261:266, 281:286]	Azilsartan Medoxomil	S3057	endocrine	Endocrinology & Hormones	RAAS	568.53	863031-21-4	free base	Azilsartan Medoxomil is a potent angiotensin II type 1 (AT1) receptor antagonist, inhibits the RAAS, with an IC50 of 2.6 nM, exhibits >10,000-fold selectivity over AT2. Phase 3.	C1(=NC2C(N1CC3C=CC(=CC=3)C4C(=CC=CC=4)C5NOC(N=5)=O)=C(C=CC=2)C(=O)OCC6OC(OC=6C)=O)OCC	200	http://www.selleckchem.com/products/azilsartan-medoxomil-tak-491.html
208	1408	L2000-18	e10	10	5	20170420	1	55	60		C15:20	A1:16, B:O7, B:O14, N1:6, O1:6	[1:20, 34:20:294, 27:20:287, 261:266, 281:286]	Nepafenac	S1255	other	Others	Others	254.28	78281-72-8	free base	Nepafenac is a non-steroidal anti-inflammatory agent.	C(CC1C(=C(C=CC=1)C(C2C=CC=CC=2)=O)N)(=O)N	200	http://www.selleckchem.com/products/Nepafenac.html
209	1409	L2000-18	e11	11	5	20170420	1	35	40		B15:20	A1:16, B:O7, B:O14, N1:6, O1:6	[1:20, 34:20:294, 27:20:287, 261:266, 281:286]	Levetiracetam	S1356	other	Others	Others	170.21	102767-28-2	free base	Levetiracetam is an antiepileptic compound.	C1(N(CCC1)[C@H](C(N)=O)CC)=O	199	http://www.selleckchem.com/products/Levetiracetam.html
210	1410	L2000-18	f2	2	6	20170420	1	208	213		K8:13	A1:16, B:O7, B:O14, N1:6, O1:6	[1:20, 34:20:294, 27:20:287, 261:266, 281:286]	Chlortetracycline HCl	S4156	microbiology			515.34	64-72-2		Chlortetracycline HCl is the first identified tetracycline antibiotic.	[C@@]12([C@](C(=C3C(C1)[C@](C4C(=CC=C(C(C3=O)=4)O)Cl)(C)O)O)(C(C(=C([C@H]2N(C)C)O)C(N)=O)=O)O)[H].Cl
211	1411	L2000-18	f3	3	6	20170420	1	188	193		J8:13	A1:16, B:O7, B:O14, N1:6, O1:6	[1:20, 34:20:294, 27:20:287, 261:266, 281:286]	Salicylanilide	S4187	microbiology	Others	Others	213.23	87-17-2	free base	Salicylanilides are a group of compounds with a wide range of biological activities including antiviral potency, antibacterial (including antimycobacterial) and antifungal activities.	C(C1C(=CC=CC=1)O)(=O)NC2C=CC=CC=2	201	http://www.selleckchem.com/products/salicylanilide.html
212	1412	L2000-18	f4	4	6	20170420	1	168	173		I8:13	A1:16, B:O7, B:O14, N1:6, O1:6	[1:20, 34:20:294, 27:20:287, 261:266, 281:286]	Piperacillin Sodium	S4222	microbiology	Others	Others	539.54	59703-84-3	sodium	Piperacillin is a semisynthetic, broad-spectrum, ampicillin derived ureidopenicillin antibiotic proposed for pseudomonas infections.	[C@@H]12(N([C@H](C(=O)[O-])C(S1)(C)C)C([C@@H]2NC([C@@H](C3=CC=CC=C3)NC(N4C(C(N(CC4)CC)=O)=O)=O)=O)=O).[Na+]	185	http://www.selleckchem.com/products/piperacillin-sodium.html
213	1413	L2000-18	f5	5	6	20170420	1	148	153		H8:13	A1:16, B:O7, B:O14, N1:6, O1:6	[1:20, 34:20:294, 27:20:287, 261:266, 281:286]	Losartan Potassium (DuP 753)	S1359	endocrine	Endocrinology & Hormones	RAAS	462.01	124750-99-8	potassium	Losartan is an angiotensin II receptor antagonist, competes with the binding of angiotensin II to AT1 receptors with IC50 of 20 nM.	C1(=CC(=CC=C1C2=C(C=CC=C2)C3NN=NN=3)CN4C(=C(N=C4CCCC)Cl)CO).[K]	199	http://www.selleckchem.com/products/losartan-potassium.html
214	1414	L2000-18	f6	6	6	20170420	1	128	133		G8:13	A1:16, B:O7, B:O14, N1:6, O1:6	[1:20, 34:20:294, 27:20:287, 261:266, 281:286]	Telmisartan	S1738	endocrine	Endocrinology & Hormones	RAAS	514.62	144701-48-4	free base	Telmisartan (Micardis) is an angiotensin II receptor antagonist (ARB) used in the management of hypertension.	C1=C(C(=CC=C1)C2=CC=C(C=C2)CN3C(=NC4=C3C=C(C=C4C)C5N(C6=C(N=5)C=CC=C6)C)CCC)C(O)=O	25	http://www.selleckchem.com/products/Telmisartan(Micardis).html
215	1415	L2000-18	f7	7	6	20170420	1	108	113		F8:13	A1:16, B:O7, B:O14, N1:6, O1:6	[1:20, 34:20:294, 27:20:287, 261:266, 281:286]	Cilazapril Monohydrate	S2081	endocrine	Endocrinology & Hormones	RAAS	435.51	92077-78-6	monohydrate	Cilazapril is a angiotensin-converting enzyme (ACE) inhibitor used for the treatment of hypertension and congestive heart failure.	C1(=CC=C(C=C1)CC[C@H](N[C@H]2CCCN3N(C2=O)[C@H](CCC3)C(O)=O)C(=O)OCC).O	199	http://www.selleckchem.com/products/cilazapril-monohydrate-inhibace.html
216	1416	L2000-18	f8	8	6	20170420	1	88	93		E8:13	A1:16, B:O7, B:O14, N1:6, O1:6	[1:20, 34:20:294, 27:20:287, 261:266, 281:286]	TAK-875	S2637	endocrine	Endocrinology & Hormones	GPR	533.63	1374598-80-7	hydrate	TAK-875 is a selective GPR40 agonist with EC50 of 14 nM, 400-fold more potent than oleic acid.	C1(=C(C=C(C=C1)COC2=CC=C3C(=C2)OC[C@H]3CC(=O)O)C4=C(C=C(C=C4C)OCCCS(=O)(C)=O)C).O.C5=C(C=C(C=C5)COC6=CC=C7C(=C6)OC[C@H]7CC(=O)O)C8=C(C=C(C=C8C)OCCCS(=O)(C)=O)C	187	http://www.selleckchem.com/products/tak-875.html
217	1417	L2000-18	f9	9	6	20170420	1	68	73		D8:13	A1:16, B:O7, B:O14, N1:6, O1:6	[1:20, 34:20:294, 27:20:287, 261:266, 281:286]	Spironolactone	S4054	endocrine	Endocrinology & Hormones	Androgen Receptor	416.57	52-01-7	free base	Spironolactone is a potent antagonist of the androgen receptor with IC50 of 77 nM.	C1C(C=C2[C@](C1)([C@]3([C@@]([C@@H](C2)SC(C)=O)([C@]4([C@](CC3)([C@@]5(CC4)OC(CC5)=O)C)[H])[H])[H])C)=O	199	http://www.selleckchem.com/products/spironolactone.html
218	1418	L2000-18	f10	10	6	20170420	1	48	53		C8:13	A1:16, B:O7, B:O14, N1:6, O1:6	[1:20, 34:20:294, 27:20:287, 261:266, 281:286]	Posaconazole	S1257	other	Others	Others	700.78	171228-49-2	free base	Posaconazole is a sterol C14ɑ demethylase inhibitor with an IC50 of 0.25 nM.	C1(=CC=C(C=C1)N2CCN(CC2)C3=CC=C(C=C3)OC[C@@H]4CO[C@](C4)(C5=CC=C(C=C5F)F)CN6N=CN=C6)N7C(N(N=C7)[C@H]([C@H](C)O)CC)=O	199	http://www.selleckchem.com/products/Posaconazole.html
219	1419	L2000-18	f11	11	6	20170420	1	28	33		B8:13	A1:16, B:O7, B:O14, N1:6, O1:6	[1:20, 34:20:294, 27:20:287, 261:266, 281:286]	Acitretin	S1368	other	Others	Others	326.43	55079-83-9	free base	Acitretin is a second generation retinoid used for psoriasis.	C1=C(C(=C(C(=C1C)/C=C/C(=C/C=C/C(=C/C(O)=O)C)C)C)C)OC	61	http://www.selleckchem.com/products/Acitretin.html
220	1420	L2000-18	g2	2	7	20170420	1	201	206		K1:6	A1:16, B:O7, B:O14, N1:6, O1:6	[1:20, 34:20:294, 27:20:287, 261:266, 281:286]	Chloroquine Phosphate	S4157	microbiology			515.86	50-63-5		Chloroquine phosphate is a 4-aminoquinoline anti-malarial and anti-rheumatoid agent.	C12(=C(N=CC=C1NC(CCCN(CC)CC)C)C=C(C=C2)Cl).P(O)(O)(O)=O.P(O)(O)(O)=O
221	1421	L2000-18	g3	3	7	20170420	1	181	186		J1:6	A1:16, B:O7, B:O14, N1:6, O1:6	[1:20, 34:20:294, 27:20:287, 261:266, 281:286]	Chlorquinaldol	S4192	microbiology	Others	Others	228.07	72-80-0	free base	Chlorquinaldol is an antimicrobial agent used for local antisepsy.	N1C(=CC=C2C(=CC(=C(C=12)O)Cl)Cl)C	201	http://www.selleckchem.com/products/chlorquinaldol.html
222	1422	L2000-18	g4	4	7	20170420	1	161	166		I1:6	A1:16, B:O7, B:O14, N1:6, O1:6	[1:20, 34:20:294, 27:20:287, 261:266, 281:286]	Fidaxomicin	S4227	microbiology	Others	Others	1058.04	873857-62-6	free base	Fidaxomicin is a narrow spectrum macrocyclic antibiotic that inhibits RNA polymerase sigma subunit.	[C@@H]1(/C=C(\[C@H](C/C=C/C=C(/C(O[C@](C/C=C(/C=C(/[C@H]1O[C@@]2(OC([C@H]([C@@H]([C@H]2O)O)OC(C(C)C)=O)(C)C)[H])C)C)([C@@H](C)O)[H])=O)CO[C@H]3[C@H]([C@H]([C@@H]([C@H](O3)C)OC(=O)C4=C(C(=C(C(=C4O)Cl)O)Cl)CC)O)OC)O)C)CC	94	http://www.selleckchem.com/products/fidaxomicin.html
223	1423	L2000-18	g5	5	7	20170420	1	141	146		H1:6	A1:16, B:O7, B:O14, N1:6, O1:6	[1:20, 34:20:294, 27:20:287, 261:266, 281:286]	Alfacalcidol	S1468	endocrine	Endocrinology & Hormones	Others	400.64	41294-56-8	free base	Alfacalcidol is a non-selective VDR activator medication.	C1[C@H](C[C@@H](C(C/1=C\C=C2/[C@]3([C@](CCC2)([C@H](CC3)[C@@H](CCCC(C)C)C)C)[H])=C)O)O	199	http://www.selleckchem.com/products/Alfacalcidol.html
224	1424	L2000-18	g6	6	7	20170420	1	121	126		G1:6	A1:16, B:O7, B:O14, N1:6, O1:6	[1:20, 34:20:294, 27:20:287, 261:266, 281:286]	Ramipril	S1793	endocrine	Endocrinology & Hormones	RAAS	416.51	87333-19-5	free base	Ramipril is an angiotensin-converting enzyme (ACE) inhibitor with IC50 of 5 nM.	C1=CC=CC=C1CC[C@@H](C(=O)OCC)N[C@H](C(N2[C@H](C[C@H]3[C@H](CCC3)2)C(O)=O)=O)C	199	http://www.selleckchem.com/products/Ramipril(Altace).html
225	1425	L2000-18	g7	7	7	20170420	1	101	106		F1:6	A1:16, B:O7, B:O14, N1:6, O1:6	[1:20, 34:20:294, 27:20:287, 261:266, 281:286]	Temocapril HCl	S2099	endocrine	Endocrinology & Hormones	RAAS	513.07	110221-44-8	hydrochloride	Temocapril HCl is the hydrochloride of Temocapril, which is a long-acting angiotensin-converting enzyme (ACE) inhibitor, used for the treatment of hypertension.	C1(=CC=CC(=C1)CC[C@H](N[C@@H]2C(N(C[C@H](SC2)C3SC=CC=3)CC(O)=O)=O)C(OCC)=O).Cl	200	http://www.selleckchem.com/products/temocapril-hcl.html
226	1426	L2000-18	g8	8	7	20170420	1	81	86		E1:6	A1:16, B:O7, B:O14, N1:6, O1:6	[1:20, 34:20:294, 27:20:287, 261:266, 281:286]	Clinofibrate	S2664	endocrine	Endocrinology & Hormones	RAAS	468.58	30299-08-2	free base	Clinofibrate inhibits hydroxymethylglutaryl coenzyme A reductase (HMGCR) with IC50 of 0.47 mM, is a lipid-lowering agent used for controlling high cholesterol and triacylglyceride levels in the blood.	C1CC(CCC1)(C2=CC=C(C=C2)OC(CC)(C)C(O)=O)C3=CC=C(C=C3)OC(CC)(C)C(=O)O	200	http://www.selleckchem.com/products/clinofibrate.html
227	1427	L2000-18	g9	9	7	20170420	1	61	66		D1:6	A1:16, B:O7, B:O14, N1:6, O1:6	[1:20, 34:20:294, 27:20:287, 261:266, 281:286]	AZD3514	S7040	endocrine	Endocrinology & Hormones	Androgen Receptor	519.56	1240299-33-5	free base	AZD3514 is a potent and oral androgen receptor downregulator with Ki of 2.2 μM and has ability of reducing AR protein expression.	C1=C(C=CC(=C1)OCCN2CCN(CC2)C(C)=O)C3CCN(CC3)C4CCC5N(N=4)C(=NN=5)C(F)(F)F	192	http://www.selleckchem.com/products/azd3514.html
228	1428	L2000-18	g10	10	7	20170420	1	41	46		C1:6	A1:16, B:O7, B:O14, N1:6, O1:6	[1:20, 34:20:294, 27:20:287, 261:266, 281:286]	Adapalene	S1276	other	Others	Others	412.52	106685-40-9	free base	Adapalene is a third-generation topical retinoid primarily used in the treatment of acne.	C1(=C(C=CC(=C1)C2=CC3=C(C=C2)C=C(C=C3)C(O)=O)OC)C45CC6CC(C4)CC(C5)C6	19	http://www.selleckchem.com/products/Adapalene.html
229	1429	L2000-18	g11	11	7	20170420	1	21	26		B1:6	A1:16, B:O7, B:O14, N1:6, O1:6	[1:20, 34:20:294, 27:20:287, 261:266, 281:286]	Pizotifen Malate	S1394	other	Others	Others	429.53	11/7/5189	malate	Pizotifen Malate is a benzocycloheptane based agent used for recurrent migraine headaches.	C1(C2=C(CCC3=C1C=CC=C3)SC=C2)=C4(CCN(CC4)C).C(C(CC(=O)O)O)(=O)O	48	http://www.selleckchem.com/products/Pizotifen-malate.html
230	1430	L2000-18	h2	2	8	20170420	1	295	300		O15:20	A1:16, B:O7, B:O14, N1:6, O1:6	[1:20, 34:20:294, 27:20:287, 261:266, 281:286]	Doxycycline Hyclate	S4163	microbiology	Others	Others	512.94	24390-14-5	hyclate	Doxycycline is a member of the tetracycline antibiotics group, and is commonly used to treat a variety of infections.	C1(=CC=C2C(=C1O)C(C3[C@@]([C@H]2C)([C@@H]([C@@]4([C@](C=3O)(C(C(=C([C@H]4N(C)C)O)C(=O)N)=O)O)[H])O)[H])=O).C5(=CC=C6C(=C5O)C(C7[C@@]([C@H]6C)([C@@H]([C@@]8([C@](C=7O)(C(C(=C([C@H]8N(C)C)O)C(=O)N)=O)O)[H])O)[H])=O).Cl.O.CCO.Cl	194	http://www.selleckchem.com/products/doxycycline-hyclate.html
231	1431	L2000-18	h3	3	8	20170420	1	275	280		M15:20	A1:16, B:O7, B:O14, N1:6, O1:6	[1:20, 34:20:294, 27:20:287, 261:266, 281:286]	Broxyquinoline	S4195	microbiology	Others	Others	302.95	521-74-4	free base	Broxyquinoline is an antiprotozoal agent and able to release oxygen free radicals from the water in mucous membranes.	C1=C(C(=C2C(=C1Br)C=CC=N2)O)Br	56	http://www.selleckchem.com/products/broxyquinoline.html
232	1432	L2000-18	h4	4	8	20170420	1	255	260		N15:20	A1:16, B:O7, B:O14, N1:6, O1:6	[1:20, 34:20:294, 27:20:287, 261:266, 281:286]	Primaquine Diphosphate	S4237	microbiology	Others	Others	455.34	63-45-6	phosphate	Primaquine Diphosphate is a transmission-blocking anti-malarial clinically available, displaying a marked activity against gametocytes of all species of human malaria.	C1(=CC(=C2C(=C1)C=CC=N2)NC(CCCN)C)OC.OP(O)(=O)O.OP(O)(=O)O	199	http://www.selleckchem.com/products/primaquine-diphosphate.html
233	1433	L2000-18	h5	5	8	20170420	1	235	240		L15:20	A1:16, B:O7, B:O14, N1:6, O1:6	[1:20, 34:20:294, 27:20:287, 261:266, 281:286]	Irbesartan	S1507	endocrine	Endocrinology & Hormones	RAAS	428.53	138402-11-6	free base	Irbesartan (SR-47436, BMS-186295) is a highly potent and specific angiotensin II type 1 (AT1) receptor antagonist with IC50 of 1.3 nM.	C1(=CC=C(C=C1)C2=CC=CC=C2C3N=NNN=3)CN4C(C5(N=C4CCCC)CCCC5)=O	10	http://www.selleckchem.com/products/Irbesartan(Avapro).html
234	1434	L2000-18	h6	6	8	20170420	1	288	293		O8:13	A1:16, B:O7, B:O14, N1:6, O1:6	[1:20, 34:20:294, 27:20:287, 261:266, 281:286]	Valsartan	S1894	endocrine	Endocrinology & Hormones	RAAS	435.52	137862-53-4	free base	Valsartan (Diovan) is an angiotensin II receptor antagonist with IC50 of ranging from 39.5 to 116 μM	C1(=CC=C(C=C1)C2=CC=CC=C2C3N=NNN=3)CN([C@@](C(C)C)(C(=O)O)[H])C(=O)CCCC	199	http://www.selleckchem.com/products/Valsartan(Diovan).html
235	1435	L2000-18	h7	7	8	20170420	1	268	273		N8:13	A1:16, B:O7, B:O14, N1:6, O1:6	[1:20, 34:20:294, 27:20:287, 261:266, 281:286]	Imidapril HCl	S2109	endocrine	Endocrinology & Hormones	RAAS	441.91	89396-94-1	free base	Imidapril HCl is a angiotensin-converting enzyme (ACE) inhibitor with IC50 of 2.6 nM, used for the treatment of hypertension.	CCOC(=O)[C@@H](N[C@H](C(N1C(N(C[C@@H]1C(=O)O)C)=O)=O)C)CCC2=CC=CC=C2	199	http://www.selleckchem.com/products/imidapril-tanatril.html
236	1436	L2000-18	h8	8	8	20170420	1	248	253		M8:13	A1:16, B:O7, B:O14, N1:6, O1:6	[1:20, 34:20:294, 27:20:287, 261:266, 281:286]	Galeterone	S2803	endocrine	Endocrinology & Hormones	P450 (e.g. CYP17),Androgen Receptor	388.55	851983-85-2	free base	Galeterone is a selective CYP17 inhibitor and androgen receptor (AR) antagonist with IC50 of 300 nM and 384 nM, respectively, and is a potent inhibitor of human prostate tumor growth. Phase 2.	[C@]12(C(C3C(CC1)[C@@]4(C(=CC3)C[C@H](CC4)O)C)CC=C2N5C6=C(N=C5)C=CC=C6)C	61	http://www.selleckchem.com/products/galeterone-tok-001.html
237	1437	L2000-18	h9	9	8	20170420	1	228	233		L8:13	A1:16, B:O7, B:O14, N1:6, O1:6	[1:20, 34:20:294, 27:20:287, 261:266, 281:286]	PD123319	S7098	endocrine	Endocrinology & Hormones	RAAS	508.61	130663-39-7	free base	PD 123319 is a potent, selective AT2 angiotensin II receptor antagonist with IC50 of 34 nM.	N1([C@@H](CC2=C(C1)N=CN2CC3=CC(=C(C=C3)N(C)C)C)C(O)=O)C(=O)C(C4=CC=CC=C4)C5=CC=CC=C5	196	http://www.selleckchem.com/products/pd123319.html
238	1438	L2000-18	h10	10	8	20170420	1	241	246		M1:6	A1:16, B:O7, B:O14, N1:6, O1:6	[1:20, 34:20:294, 27:20:287, 261:266, 281:286]	Budesonide	S1286	other	Others	Others	430.53	51333-22-3	free base	Budesonide is a glucocorticoid steroid for the treatment of asthma, non-infectious rhinitis.	C1C(C=C2[C@](C=1)([C@]3([C@@](CC2)([C@]4([C@](C[C@H]3O)([C@@]5([C@@H](C4)O[C@](O5)(CCC)[H])C(CO)=O)C)[H])[H])[H])C)=O	199	http://www.selleckchem.com/products/Budesonide.html
239	1439	L2000-18	h11	11	8	20170420	1	221	226		L1:6	A1:16, B:O7, B:O14, N1:6, O1:6	[1:20, 34:20:294, 27:20:287, 261:266, 281:286]	Vecuronium Bromide	S1405	other	Others	Others	637.73	50700-72-6	bromide	Vecuronium Bromide is a muscle relaxant in the category of non-depolarizing blocking agents.	C1(CCN(CC1)[C@@H]2[C@H](C[C@]3([C@](C2)([C@]4([C@@](CC3)([C@]5([C@](CC4)([C@@H]([C@H](C5)[N+]6(CCCCC6)C)OC(C)=O)C)[H])[H])[H])C)[H])OC(C)=O).[Br-]	200	http://www.selleckchem.com/products/Vecuronium-Bromide.html#
240	1440	L2000-19	a2	2	1	20170424	0	215	220		K15:20	A1:16, B:O7, B:O14, N1:6, O1:6	[1:20, 34:20:294, 27:20:287, 261:266, 281:286]	Bimatoprost	S1407	other	Others	Others	415.57	155206-00-1	free base	Bimatoprost is a prostaglandin analog used topically (as eye drops) to control the progression of glaucoma and in the management of ocular hypertension.	C1=CC=C(C=C1)CCC(O)/C=C/[C@@H]2[C@H]([C@H](C[C@H]2O)O)C/C=C\CCCC(=O)NCC	86	http://www.selleckchem.com/products/Bimatoprost.html
241	1441	L2000-19	a3	3	1	20170424	0	195	200		J15:20	A1:16, B:O7, B:O14, N1:6, O1:6	[1:20, 34:20:294, 27:20:287, 261:266, 281:286]	Betamethasone	S1500	other	Others	Others	392.46	378-44-9	free base	Betamethasone is a glucocorticoid steroid with anti-inflammatory and immunosuppressive properties.	C1C(C=C2[C@](C=1)([C@]3([C@@](CC2)([C@]4([C@](C[C@H]3O)([C@@]([C@H](C4)C)(C(CO)=O)O)C)[H])[H])F)C)=O	201	http://www.selleckchem.com/products/Betamethasone-(Celestone).html
242	1442	L2000-19	a4	4	1	20170424	0	175	180		I15:20	A1:16, B:O7, B:O14, N1:6, O1:6	[1:20, 34:20:294, 27:20:287, 261:266, 281:286]	Metolazone	S1610	other	Others	Others	365.83	17560-51-9	free base	Metolazone(Zaroxolyn) is primarily used to treat congestive heart failure and high blood pressure.	C1(=C(C=C2C(=C1)NC(N(C2=O)C3=CC=CC=C3C)C)S(=O)(=O)N)Cl	199	http://www.selleckchem.com/products/Metolazone(Zaroxolyn).html
243	1443	L2000-19	a5	5	1	20170424	0	155	160		H15:20	A1:16, B:O7, B:O14, N1:6, O1:6	[1:20, 34:20:294, 27:20:287, 261:266, 281:286]	Monobenzone	S1652	other	Others	Others	200.23	103-16-2	free base	Monobenzone is a compound used as a topical agent for medical depigmentation.	C1=C(C=CC(=C1)O)OCC2=CC=CC=C2	199	http://www.selleckchem.com/products/Monobenzone(Benoquin).html
244	1444	L2000-19	a6	6	1	20170424	0	135	140		G15:20	A1:16, B:O7, B:O14, N1:6, O1:6	[1:20, 34:20:294, 27:20:287, 261:266, 281:286]	Torsemide	S1698	other	Others	Others	348.42	56211-40-6	free base	Torsemide(Demadex) is a pyridine-sulfonyl urea type loop diuretic with an IC50 of 2.7 ± 0.17 μM.	C1(=C(C=CN=C1)NC2=CC(=CC=C2)C)S(NC(NC(C)C)=O)(=O)=O	10	http://www.selleckchem.com/products/Torsemide(Demadex).html
245	1445	L2000-19	a7	7	1	20170424	0	115	120		F15:20	A1:16, B:O7, B:O14, N1:6, O1:6	[1:20, 34:20:294, 27:20:287, 261:266, 281:286]	Gemfibrozil	S1729	other	Others	Others	250.33	25812-30-0	free base	Gemfibrozil (Lopid) is a compound used to lower lipid levels.	C1=CC(=CC(=C1C)OCCCC(C(=O)O)(C)C)C	199	http://www.selleckchem.com/products/Gemfibrozil(Lopid).html
246	1446	L2000-19	a8	8	1	20170424	0	95	100		E15:20	A1:16, B:O7, B:O14, N1:6, O1:6	[1:20, 34:20:294, 27:20:287, 261:266, 281:286]	Nicotinic Acid	S1744	other	Others	Others	123.11	59-67-6	free base	Nicotinic Acid is a water-soluble vitamin belonging to the vitamin B family.	C1=CN=CC(=C1)C(=O)O	203	http://www.selleckchem.com/products/Niacin(Nicotinic-acid).html
247	1447	L2000-19	a9	9	1	20170424	0	75	80		D15:20	A1:16, B:O7, B:O14, N1:6, O1:6	[1:20, 34:20:294, 27:20:287, 261:266, 281:286]	Acipimox	S1806	other	Others	Others	154.12	51037-30-0	free base	Acipimox is a niacin derivative used as a hypolipidemic agent.	C1=C([N+](=CC(=N1)C(=O)O)[O-])C	201	http://www.selleckchem.com/products/Acipimox.html
248	1448	L2000-19	a10	10	1	20170424	0	55	60		C15:20	A1:16, B:O7, B:O14, N1:6, O1:6	[1:20, 34:20:294, 27:20:287, 261:266, 281:286]	Albendazole Oxide	S1836	other	Others	Others	281.33	54029-12-8	free base	Albendazole Oxide is a tubulin polymerization or assembly inhibitor.	C1(C=CC2=C(C=1)NC(=N2)NC(=O)OC)S(CCC)=O	39	http://www.selleckchem.com/products/albendazole-oxide-ricobendazole.html
249	1449	L2000-19	a11	11	1	20170424	0	35	40		B15:20	A1:16, B:O7, B:O14, N1:6, O1:6	[1:20, 34:20:294, 27:20:287, 261:266, 281:286]	Diltiazem HCl	S1865	other	Others	Others	450.98	33286-22-5	hydrochloride	Diltiazem HCl (Tiazac) is a benzothiazepine derivative with vasodilating action due to its antagonism of the actions of the calcium ion in membrane functions.	C12(N(C([C@@H]([C@@H](SC=1C=CC=C2)C3=CC=C(C=C3)OC)OC(C)=O)=O)CCN(C)C).Cl	199	http://www.selleckchem.com/products/Diltiazem-HCl(Tiazac).html
250	1450	L2000-19	b2	2	2	20170424	0	208	213		K8:13	A1:16, B:O7, B:O14, N1:6, O1:6	[1:20, 34:20:294, 27:20:287, 261:266, 281:286]	Prazosin HCl	S1424	other	Others	Others	419.86	19237-84-4	free base	Prazosin hydrochloride, a quinazoline derivative, is the first of a new chemical class of antihypertensives.	C1(=C(C(=CC2=C1C(=NC(=N2)N3CCN(CC3)C(C4=CC=CO4)=O)N)OC)OC).Cl	10	http://www.selleckchem.com/products/Prazosin-hydrochloride.html
251	1451	L2000-19	b3	3	2	20170424	0	188	193		J8:13	A1:16, B:O7, B:O14, N1:6, O1:6	[1:20, 34:20:294, 27:20:287, 261:266, 281:286]	Alprostadil	S1508	other	Others	Others	354.48	745-65-3	free base	Alprostadil is used as a drug in the treatment of erectile dysfunction and has vasodilatory properties.	[C@@H]1([C@@H]([C@H](CC1=O)O)/C=C/[C@H](CCCCC)O)CCCCCCC(O)=O	200	http://www.selleckchem.com/products/Alprostadil(Caverject).html
252	1452	L2000-19	b4	4	2	20170424	0	168	173		I8:13	A1:16, B:O7, B:O14, N1:6, O1:6	[1:20, 34:20:294, 27:20:287, 261:266, 281:286]	Prilocaine	S1619	other	Others	Others	220.31	721-50-6	free base	Prilocaine is a local anesthetic of the amino amide type.	C1=CC=CC(=C1C)NC(C(NCCC)C)=O	199	http://www.selleckchem.com/products/Prilocaine.html
253	1453	L2000-19	b5	5	2	20170424	0	148	153		H8:13	A1:16, B:O7, B:O14, N1:6, O1:6	[1:20, 34:20:294, 27:20:287, 261:266, 281:286]	Phenylbutazone	S1654	other	Others	Others	308.37	50-33-9	free base	Phenylbutazone(Butazolidin, Butatron) is used as a non-steroidal anti-inflammatory agent for the treatment of chronic pain, including the symptoms of arthritis.	N1(N(C(C(C1=O)CCCC)=O)C2=CC=CC=C2)C3=CC=CC=C3	201	http://www.selleckchem.com/products/Phenylbutazone(Butazolidin).html
254	1454	L2000-19	b6	6	2	20170424	0	128	133		G8:13	A1:16, B:O7, B:O14, N1:6, O1:6	[1:20, 34:20:294, 27:20:287, 261:266, 281:286]	Desonide	S1701	other	Others	Others	416.51	638-94-8	free base	Desonide is a low potency topical corticosteroid.	C1C(C=C2[C@](C=1)([C@]3([C@@](CC2)([C@]4([C@](C[C@H]3O)([C@@]5([C@@](C4)(OC(O5)(C)C)[H])C(CO)=O)C)[H])[H])[H])C)=O	199	http://www.selleckchem.com/products/Desonide.html
255	1455	L2000-19	b7	7	2	20170424	0	108	113		F8:13	A1:16, B:O7, B:O14, N1:6, O1:6	[1:20, 34:20:294, 27:20:287, 261:266, 281:286]	Indapamide	S1730	other	Others	Others	365.83	26807-65-8	free base	Indapamide(Lozol) is a non-thiazide sulphonamide diuretic compound, generally used in the treatment of hypertension, as well as decompensated cardiac failure.	C1=C(C=C(C(=C1)Cl)S(N)(=O)=O)C(NN2C3=C(CC2C)C=CC=C3)=O	199	http://www.selleckchem.com/products/Indapamide(Lozol).html
256	1456	L2000-19	b8	8	2	20170424	0	88	93		E8:13	A1:16, B:O7, B:O14, N1:6, O1:6	[1:20, 34:20:294, 27:20:287, 261:266, 281:286]	Nisoldipine	S1748	other	Others	Others	388.41	63675-72-9	free base	Nisoldipine (Sular) is a calcium channel blocker belonging to the dihydropyridines class, specific for L-type Cav1.2 with IC50 of 10 nM.	C1(=C(C(C(=C(N1)C)C(OC)=O)C2=CC=CC=C2[N+](=O)[O-])C(OCC(C)C)=O)C	200	http://www.selleckchem.com/products/Nisoldipine(Sular).html
257	1457	L2000-19	b9	9	2	20170424	0	68	73		D8:13	A1:16, B:O7, B:O14, N1:6, O1:6	[1:20, 34:20:294, 27:20:287, 261:266, 281:286]	Nifedipine	S1808	other	Others	Others	346.33	21829-25-4	free base	Nifedipine(Adalat), a potent vasodilator agent with calcium antagonistic action.	C1=CC(=C(C=C1)[N+]([O-])=O)C2C(=C(NC(=C2C(=O)OC)C)C)C(OC)=O	199	http://www.selleckchem.com/products/Nifedipine(Adalat).html
258	1458	L2000-19	b10	10	2	20170424	0	48	53		C8:13	A1:16, B:O7, B:O14, N1:6, O1:6	[1:20, 34:20:294, 27:20:287, 261:266, 281:286]	Flubendazole	S1837	other	Others	Others	313.28	31430-15-6	free base	Flubendazole is an anthelmintic agent for MDAY-D2 cells with IC50 of 3 nM.	C1(C(=O)C2=CC3=C(C=C2)N=C(N3)NC(=O)OC)=CC=C(C=C1)F	10	http://www.selleckchem.com/products/flubendazole-flutelmium.html
259	1459	L2000-19	b11	11	2	20170424	0	28	33		B8:13	A1:16, B:O7, B:O14, N1:6, O1:6	[1:20, 34:20:294, 27:20:287, 261:266, 281:286]	Tranexamic Acid	S1875	other	Others	Others	157.21	1197-18-8	free base	Tranexamic acid (Transamin) is an antifibrinolytic for blocking lysine-binding sites of plasmin and elastase-derived plasminogen fragments with IC50 of 5 mM.	C1C[C@@H](CC[C@@H]1C(O)=O)CN	10	http://www.selleckchem.com/products/tranexamic-acid-transamin.html
260	1460	L2000-19	c2	2	3	20170424	0	201	206		K1:6	A1:16, B:O7, B:O14, N1:6, O1:6	[1:20, 34:20:294, 27:20:287, 261:266, 281:286]	Tranilast	S1439	other	Others	Others	327.33	53902-12-8	free base	Tranilast is an antiallergic compound.	C1(=C(C=CC(=C1)/C=C/C(NC2=CC=CC=C2C(O)=O)=O)OC)OC	201	http://www.selleckchem.com/products/Tranilast.html
261	1461	L2000-19	c3	3	3	20170424	0	181	186		J1:6	A1:16, B:O7, B:O14, N1:6, O1:6	[1:20, 34:20:294, 27:20:287, 261:266, 281:286]	Cyclosporine	S1514	other	Others	Others	1202.61	79217-60-0	free base	Cyclosporine (Neoral) is an immunosuppressant drug.	C1(N(C)C(C(NC(C(NC(C(CC(C)C)N(C(C(NC(C(CC(C)C)N(C)C(=O)CN(C)C(C(CC)NC(C(N(C(C(N(C(=O)C(N(C)C1=O)CC(C)C)C)C(C)C)=O)C)[C@@H]([C@@H](C/C=C/C)C)O)=O)=O)=O)C(C)C)=O)C)=O)C)=O)C)=O)CC(C)C	123	http://www.selleckchem.com/products/Cyclosporine.html
262	1462	L2000-19	c4	4	3	20170424	0	161	166		I1:6	A1:16, B:O7, B:O14, N1:6, O1:6	[1:20, 34:20:294, 27:20:287, 261:266, 281:286]	Acetylcysteine	S1623	other	Others	Others,AChR	163.19	616-91-1	free base	Acetylcysteine is a pharmaceutical drug and nutritional supplement used primarily as a mucolytic agent and in the management of paracetamol (acetaminophen) overdose.	C(C)(N[C@](C(O)=O)(CS)[H])=O	202	http://www.selleckchem.com/products/Acetylcysteine.html
263	1463	L2000-19	c5	5	3	20170424	0	141	146		H1:6	A1:16, B:O7, B:O14, N1:6, O1:6	[1:20, 34:20:294, 27:20:287, 261:266, 281:286]	Dofetilide	S1658	other	Others	Others	441.56	115256-11-6	free base	Dofetilide(Tikosyn) is a class III antiarrhythmic agent.	C1=C(C=CC(=C1)CCN(CCOC2=CC=C(C=C2)NS(C)(=O)=O)C)NS(C)(=O)=O	199	http://www.selleckchem.com/products/Dofetilide(Tikosyn).html
264	1464	L2000-19	c6	6	3	20170424	0	121	126		G1:6	A1:16, B:O7, B:O14, N1:6, O1:6	[1:20, 34:20:294, 27:20:287, 261:266, 281:286]	Progesterone	S1705	other	Others	Others	314.46	57-83-0	free base	Progesterone is a C-21 steroid hormone.	C1C(C=C2[C@](C1)([C@]3([C@@](CC2)([C@]4([C@](CC3)([C@@H](CC4)C(C)=O)C)[H])[H])[H])C)=O	69	http://www.selleckchem.com/products/Progesterone(Prometrium).html
265	1465	L2000-19	c7	7	3	20170424	0	101	106		F1:6	A1:16, B:O7, B:O14, N1:6, O1:6	[1:20, 34:20:294, 27:20:287, 261:266, 281:286]	Methylprednisolone	S1733	other	Others	Others	374.47	83-43-2	free base	Methylprednisolone is a synthetic corticosteroid with anti-inflammatory and immunomodulating properties.	C1C(C=C2[C@](C=1)([C@]3([C@@](C[C@@H]2C)([C@]4([C@](C[C@H]3O)([C@@](CC4)(C(CO)=O)O)C)[H])[H])[H])C)=O	200	http://www.selleckchem.com/products/Methylprednisolone.html
266	1466	L2000-19	c8	8	3	20170424	0	81	86		E1:6	A1:16, B:O7, B:O14, N1:6, O1:6	[1:20, 34:20:294, 27:20:287, 261:266, 281:286]	Gadodiamide	S1751	other	Others	Others	591.67	122795-43-1	hydrate	Gadodiamide(Omniscan) is a gadolinium-based contrast agent used in MR imaging procedures to assist in the visualization of blood vessels.	C(=O)(CN(CCN(CC(=O)[O-])CCN(CC([O-])=O)CC(NC)=O)CC(=O)[O-])NC.[Gd+3].O	10	http://www.selleckchem.com/products/Gadodiamide(Omniscan).html
267	1467	L2000-19	c9	9	3	20170424	0	61	66		D1:6	A1:16, B:O7, B:O14, N1:6, O1:6	[1:20, 34:20:294, 27:20:287, 261:266, 281:286]	Amiloride HCl	S1811	other	Others	Others	266.09	2016-88-8	hydrochloride	Amiloride hydrochloride(Midamor), a pyrazine compound inhibiting sodium reabsorption through sodium channels in renal epithelial cells.	C1(=C(N=C(C(=N1)C(NC(N)=N)=O)N)N)Cl.Cl	199	http://www.selleckchem.com/products/Amiloride-hydrochloride(Midamor).html
268	1468	L2000-19	c10	10	3	20170424	0	41	46		C1:6	A1:16, B:O7, B:O14, N1:6, O1:6	[1:20, 34:20:294, 27:20:287, 261:266, 281:286]	Chenodeoxycholic Acid	S1843	other	Others	Others	392.57	474-25-9	free base	Chenodeoxycholic acid is a naturally occurring human bile acid.	C1[C@H](C[C@@]2([C@](C1)([C@]3([C@@]([C@@H](C2)O)([C@]4([C@](CC3)([C@](CC4)([H])[C@@H](CCC(O)=O)C)C)[H])[H])[H])C)[H])O	201	http://www.selleckchem.com/products/Chenodeoxycholic-acid.html
269	1469	L2000-19	c11	11	3	20170424	0	21	26		B1:6	A1:16, B:O7, B:O14, N1:6, O1:6	[1:20, 34:20:294, 27:20:287, 261:266, 281:286]	Deflazacort	S1888	other	Others	Others	441.52	14484-47-0	free base	Deflazacort(Calcort) is a glucocorticoid used as an anti-inflammatory and immunosuppressant.	C1C(C=C2[C@](C=1)([C@]3([C@@](CC2)([C@]4([C@](C[C@H]3O)([C@@]5([C@@](C4)(OC(=N5)C)[H])C(COC(C)=O)=O)C)[H])[H])[H])C)=O	199	http://www.selleckchem.com/products/Deflazacor.html
270	1470	L2000-19	d2	2	4	20170424	0	295	300		O15:20	A1:16, B:O7, B:O14, N1:6, O1:6	[1:20, 34:20:294, 27:20:287, 261:266, 281:286]	Ziprasidone HCl	S1444	other	Others	Others	449.4	122883-93-6	hydrochloride	Ziprasidone HCl was the fifth atypical antipsychotic.	C1(=CC=CC2=C1C(=NS2)N3CCN(CC3)CCC4C(=CC5=C(C=4)CC(N5)=O)Cl).Cl	200	http://www.selleckchem.com/products/Ziprasidone-hydrochloride.html
271	1471	L2000-19	d3	3	4	20170424	0	275	280		M15:20	A1:16, B:O7, B:O14, N1:6, O1:6	[1:20, 34:20:294, 27:20:287, 261:266, 281:286]	Tazarotene	S1569	other	Others	Others	351.46	118292-40-3	free base	Tazarotene is a prescription topical retinoid sold as a cream or gel.	C1CC(C2=C(S1)C=CC(=C2)C#CC3=NC=C(C=C3)C(=O)OCC)(C)C	28	http://www.selleckchem.com/products/Tazarotene(Avage).html
272	1472	L2000-19	d4	4	4	20170424	0	255	260		N15:20	A1:16, B:O7, B:O14, N1:6, O1:6	[1:20, 34:20:294, 27:20:287, 261:266, 281:286]	Orlistat	S1629	other	Others	Others	495.73	96829-58-2	free base	Orlistat is a general lipase inhibitor with IC50 of 122 ng/ml for PL from human duodenal juice.	C1([C@H]([C@@H](O1)C[C@H](CCCCCCCCCCC)OC(=O)[C@H](CC(C)C)NC=O)CCCCCC)=O	199	http://www.selleckchem.com/products/Orlistat(Alli).html
273	1473	L2000-19	d5	5	4	20170424	0	235	240		L15:20	A1:16, B:O7, B:O14, N1:6, O1:6	[1:20, 34:20:294, 27:20:287, 261:266, 281:286]	Trichlormethiazide	S1667	other	Others	Others	380.66	133-67-5	free base	Trichlormethiazide(Achletin) is a diuretic with properties similar to those of hydrochlorothiazide.	C1(=C(C=C2C(=C1)NC(NS2(=O)=O)C(Cl)Cl)S(=O)(=O)N)Cl	141	http://www.selleckchem.com/products/Trichlormethiazide(Achletin).html
274	1474	L2000-19	d6	6	4	20170424	0	288	293		O8:13	A1:16, B:O7, B:O14, N1:6, O1:6	[1:20, 34:20:294, 27:20:287, 261:266, 281:286]	Hydrochlorothiazide	S1708	other	Others	Others	297.74	58-93-5	free base	Hydrochlorothiazide is a first line diuretic compound of the thiazide class.	C1(=C(C=C2C(=C1)NCNS2(=O)=O)S(N)(=O)=O)Cl	201	http://www.selleckchem.com/products/Hydrochlorothiazide.html
275	1475	L2000-19	d7	7	4	20170424	0	268	273		N8:13	A1:16, B:O7, B:O14, N1:6, O1:6	[1:20, 34:20:294, 27:20:287, 261:266, 281:286]	Meloxicam	S1734	other	Others	Others	351.4	71125-38-7	free base	Meloxicam (Mobic) is a nonsteroidal anti-inflammatory agent with analgesic and fever reducer effects.	C1(N(S(C2=C(C=1O)C=CC=C2)(=O)=O)C)C(=O)NC3=NC=C(S3)C	85	http://www.selleckchem.com/products/Meloxicam(Mobic).html
276	1476	L2000-19	d8	8	4	20170424	0	248	253		M8:13	A1:16, B:O7, B:O14, N1:6, O1:6	[1:20, 34:20:294, 27:20:287, 261:266, 281:286]	Pitavastatin Calcium	S1759	other	Others	Others	880.98	147526-32-7	calcium	Pitavastatin calcium is a novel member of the medication class of statins.	[Ca+2].C1(=CC=C2C(=C1)C(=C(C(=N2)C3CC3)C=C[C@@H](O)C[C@H](CC([O-])=O)O)C4=CC=C(C=C4)F).C5=CC=C6C(=C5)C(=C(C(=N6)C7CC7)C=C[C@@H](O)C[C@H](CC([O-])=O)O)C8=CC=C(C=C8)F	57	http://www.selleckchem.com/products/Pitavastatin-calcium(Livalo).html
277	1477	L2000-19	d9	9	4	20170424	0	228	233		L8:13	A1:16, B:O7, B:O14, N1:6, O1:6	[1:20, 34:20:294, 27:20:287, 261:266, 281:286]	Fenoprofen Calcium	S1823	other	Others	Others	522.6	34597-40-5	free base	Fenoprofen calcium is a nonsteroidal, anti-inflammatory antiarthritic agent.	[Ca+2].O(C1=CC=CC(=C1)C(C)C([O-])=O)C2(=CC=CC=C2).O(C3=CC=CC(=C3)C(C)C([O-])=O)C4=CC=CC=C4	200	http://www.selleckchem.com/products/fenoprofen-calcium.html
278	1478	L2000-19	d10	10	4	20170424	0	241	246		M1:6	A1:16, B:O7, B:O14, N1:6, O1:6	[1:20, 34:20:294, 27:20:287, 261:266, 281:286]	Curcumin	S1848	other	Others	Others	368.38	458-37-7	free base	Curcumin is the principal curcuminoid of the popular Indian spice turmeric, which is a member of the ginger family (Zingiberaceae).	C1(=C(C=CC(=C1)/C=C/C(/C=C(/C=C/C2=CC=C(C(=C2)OC)O)O)=O)O)OC	200	http://www.selleckchem.com/products/Curcumin.html
279	1479	L2000-19	d11	11	4	20170424	0	221	226		L1:6	A1:16, B:O7, B:O14, N1:6, O1:6	[1:20, 34:20:294, 27:20:287, 261:266, 281:286]	Carbidopa	S1891	other	Others	Others	226.23	28860-95-9	free base	Carbidopa is an aromatic-L-amino-acid decarboxylase inhibitor with an IC50 of 29 ± 2 μM.	C1(=C(C=CC(=C1)C[C@](C(O)=O)(C)NN)O)O	17	http://www.selleckchem.com/products/Carbidopa.html
280	1480	L2000-19	e2	2	5	20170424	1	215	220		K15:20	A1:16, B:O7, B:O14, N1:6, O1:6	[1:20, 34:20:294, 27:20:287, 261:266, 281:286]	Zonisamide	S1445	other	Others	Others	212.23	68291-97-4	free base	Zonisamide is a sulfonamide anticonvulsant approved for use as an adjunctive.	C12=CC=CC=C1ON=C2CS(N)(=O)=O	197	http://www.selleckchem.com/products/Zonisamide.html
281	1481	L2000-19	e3	3	5	20170424	1	195	200		J15:20	A1:16, B:O7, B:O14, N1:6, O1:6	[1:20, 34:20:294, 27:20:287, 261:266, 281:286]	Sulfasalazine	S1576	other	Others	Others	398.39	599-79-1	free base	Sulfasalazine is a sulfa agent and a derivative of mesalazine used primarily as an anti-inflammatory agent.	C1(NS(C2=CC=C(C=C2)/N=N/C3=CC(=C(C=C3)O)C(=O)O)(=O)=O)=CC=CC=N1	200	http://www.selleckchem.com/products/Sulfasalazine(Azulfidine).html
282	1482	L2000-19	e4	4	5	20170424	1	175	180		I15:20	A1:16, B:O7, B:O14, N1:6, O1:6	[1:20, 34:20:294, 27:20:287, 261:266, 281:286]	Zafirlukast	S1633	other	Others	Others	575.68	107753-78-6	free base	Zafirlukast is a leukotriene receptor antagonist (LTRA). (IC50=0.6μM, IC50=7.0 µM for CYP2C9)	C12=C(C=C(C=C1)NC(OC3CCCC3)=O)C(=CN2C)CC4=CC=C(C=C4OC)C(=O)NS(C5=CC=CC=C5C)(=O)=O	173	http://www.selleckchem.com/products/Zafirlukast(Accolate).html
283	1483	L2000-19	e5	5	5	20170424	1	155	160		H15:20	A1:16, B:O7, B:O14, N1:6, O1:6	[1:20, 34:20:294, 27:20:287, 261:266, 281:286]	Loteprednol etabonate	S1669	other	Others	Others	466.95	82034-46-6	free base	Loteprednol etabonate is an anti-inflammatory corticosteroid used in ophthalmology.	C1C(C=C2[C@](C=1)([C@]3([C@@](CC2)([C@]4([C@](C[C@H]3O)([C@@](CC4)(C(OCCl)=O)OC(OCC)=O)C)[H])[H])[H])C)=O	199	http://www.selleckchem.com/products/Loteprednol-etabonate.html
284	1484	L2000-19	e6	6	5	20170424	1	135	140		G15:20	A1:16, B:O7, B:O14, N1:6, O1:6	[1:20, 34:20:294, 27:20:287, 261:266, 281:286]	Deferasirox	S1712	other	Others	Others	373.36	201530-41-8	free base	Deferasirox(Exjade) is a rationally-designed oral iron chelator.	C1=CC(=CC=C1C(O)=O)N2C(=NC(=N2)C3=CC=CC=C3O)C4=CC=CC=C4O	200	http://www.selleckchem.com/products/Deferasirox(Exjade).html
285	1485	L2000-19	e7	7	5	20170424	1	115	120		F15:20	A1:16, B:O7, B:O14, N1:6, O1:6	[1:20, 34:20:294, 27:20:287, 261:266, 281:286]	Methocarbamol	S1736	other	Others	Others	241.24	532-03-6	free base	Methocarbamol(Robaxin) is a central muscle relaxant used to treat skeletal muscle spasms.	C1=CC=CC(=C1OC)OCC(O)COC(N)=O	198	http://www.selleckchem.com/products/Methocarbamol(Robaxin).html
286	1486	L2000-19	e8	8	5	20170424	1	95	100		E15:20	A1:16, B:O7, B:O14, N1:6, O1:6	[1:20, 34:20:294, 27:20:287, 261:266, 281:286]	Suprofen	S1761	other	Others	Others	260.31	40828-46-4	free base	Suprofen(Profenal) is an NSAID.	C1(=CC=C(C=C1)C(C(O)=O)C)C(C2SC=CC=2)=O	199	http://www.selleckchem.com/products/Suprofen(Profenal).html
287	1487	L2000-19	e9	9	5	20170424	1	75	80		D15:20	A1:16, B:O7, B:O14, N1:6, O1:6	[1:20, 34:20:294, 27:20:287, 261:266, 281:286]	Erdosteine	S1825	other	Others	Others	249.31	84611-23-4	free base	Erdosteine is a mucolytic which is used in treatment of excessive viscous mucus.	S1C(C(CC1)NC(CSCC(O)=O)=O)=O	200	http://www.selleckchem.com/products/erdosteine.html
288	1488	L2000-19	e10	10	5	20170424	1	55	60		C15:20	A1:16, B:O7, B:O14, N1:6, O1:6	[1:20, 34:20:294, 27:20:287, 261:266, 281:286]	Daidzein	S1849	other	Others	Others	254.24	486-66-8	free base	Daidzein belongs to the group of isoflavones.	C1=C(C=C2C(=C1)C(C(=CO2)C3=CC=C(C=C3)O)=O)O	200	http://www.selleckchem.com/products/Daidzein.html
289	1489	L2000-19	e11	11	5	20170424	1	35	40		B15:20	A1:16, B:O7, B:O14, N1:6, O1:6	[1:20, 34:20:294, 27:20:287, 261:266, 281:286]	Potassium Iodide	S1897	other	Others	Others	166	7681-11-0	Inorganic salt	Potassium iodide is used to treat overactive thyroid and to protect the thyroid gland from the effects of radiation from inhaled or swallowed radioactive iodine.	[K+].[I-]	198	http://www.selleckchem.com/products/Potassium-iodide.html
290	1490	L2000-19	f2	2	6	20170424	1	208	213		K8:13	A1:16, B:O7, B:O14, N1:6, O1:6	[1:20, 34:20:294, 27:20:287, 261:266, 281:286]	Calcitriol	S1466	other	Others	Others	416.64	32222-06-3	free base	Calcitriol is the hormonally active form of vitamin D.	[C@@H]1(C[C@@H](C(/C(C1)=C\C=C2\[C@]3([C@](CCC2)([C@@H](CC3)[C@@H](CCCC(C)(C)O)C)C)[H])=C)O)O	199	http://www.selleckchem.com/products/Calcitriol-(Rocaltrol).html
291	1491	L2000-19	f3	3	6	20170424	1	188	193		J8:13	A1:16, B:O7, B:O14, N1:6, O1:6	[1:20, 34:20:294, 27:20:287, 261:266, 281:286]	Reserpine	S1601	other	Others	Others	608.68	50-55-5	free base	Reserpine is an indole alkaloid antipsychotic and antihypertensive drug that has been used for the control of high blood pressure and for the relief of psychotic symptoms.	C12=C([C@@]3(N(CC1)C[C@@]4([C@](C3)([C@@H]([C@H]([C@@H](C4)OC(=O)C5=CC(=C(C(=C5)OC)OC)OC)OC)C(OC)=O)[H])[H])[H])NC6=C2C=CC(=C6)OC	21	http://www.selleckchem.com/products/Reserpine.html
292	1492	L2000-19	f4	4	6	20170424	1	168	173		I8:13	A1:16, B:O7, B:O14, N1:6, O1:6	[1:20, 34:20:294, 27:20:287, 261:266, 281:286]	Chlorothiazide	S1641	other	Others	Others	295.72	58-94-6	free base	Chlorothiazide is a diuretic and antihypertensive. (IC50=3.8 mM)	C1(=C(C=C2C(=C1)N=CNS2(=O)=O)S(N)(=O)=O)Cl	199	http://www.selleckchem.com/products/Chlorothiazide(Diuril).html
293	1493	L2000-19	f5	5	6	20170424	1	148	153		H8:13	A1:16, B:O7, B:O14, N1:6, O1:6	[1:20, 34:20:294, 27:20:287, 261:266, 281:286]	（6-）ε-​Aminocaproic acid	S1671	other	Others	Others	131.17	60-32-2	free base	（6-）ε-​Aminocaproic acid is a derivative and analogue of the amino acid lysine.	NCCCCCC(O)=O	45	http://www.selleckchem.com/products/Aminocaproic-acid(Amicar).html
294	1494	L2000-19	f6	6	6	20170424	1	128	133		G8:13	A1:16, B:O7, B:O14, N1:6, O1:6	[1:20, 34:20:294, 27:20:287, 261:266, 281:286]	Glipizide	S1715	other	Others	Others	445.54	29094-61-9	free base	Glipizide(Glucotrol) is used to treat high blood sugar levels caused by a type of diabetes mellitus called type 2 diabetes.	C1(=CC=C(C=C1)CCNC(C2=CN=C(C=N2)C)=O)S(NC(NC3CCCCC3)=O)(=O)=O	199	http://www.selleckchem.com/products/Glipizide(Glucotrol).html
295	1495	L2000-19	f7	7	6	20170424	1	108	113		F8:13	A1:16, B:O7, B:O14, N1:6, O1:6	[1:20, 34:20:294, 27:20:287, 261:266, 281:286]	Prednisolone	S1737	other	Others	Others	360.44	50-24-8	free base	Prednisolone(Hydroretrocortine) is a synthetic glucocorticoid with anti-inflammatory and immunomodulating properties.	C1C(C=C2[C@](C=1)([C@]3([C@@](CC2)([C@]4([C@](C[C@H]3O)([C@@](CC4)(C(=O)CO)O)C)[H])[H])[H])C)=O	199	http://www.selleckchem.com/products/Prednisolone(Hydroretrocortine).html
296	1496	L2000-19	f8	8	6	20170424	1	88	93		E8:13	A1:16, B:O7, B:O14, N1:6, O1:6	[1:20, 34:20:294, 27:20:287, 261:266, 281:286]	Beta Carotene	S1767	other	Others	Others	536.87	7235-40-7	free base	Beta Carotene is an organic compound and classified as a terpenoid. It is a precursor (inactive form) of vitamin A.	C1CCC(C(=C1C)/C=C/C(=C/C=C/C(=C/C=C/C=C(/C=C/C=C(/C=C/C2=C(CCCC2(C)C)C)C)C)C)C)(C)C	10	http://www.selleckchem.com/products/Beta-Carotene.html
297	1497	L2000-19	f9	9	6	20170424	1	68	73		D8:13	A1:16, B:O7, B:O14, N1:6, O1:6	[1:20, 34:20:294, 27:20:287, 261:266, 281:286]	Pranlukast	S1829	other	Others	Others	481.5	103177-37-3	free base	Pranlukast is a selective cysteinyl leukotriene receptor antagonist.	C12=C(C=C(C=C1)NC(C3=CC=C(C=C3)OCCCCC4=CC=CC=C4)=O)OC(=CC2=O)C5=NN=NN5	22	http://www.selleckchem.com/products/pranlukast.html
298	1498	L2000-19	f10	10	6	20170424	1	48	53		C8:13	A1:16, B:O7, B:O14, N1:6, O1:6	[1:20, 34:20:294, 27:20:287, 261:266, 281:286]	Oxibendazole	S1851	other	Others	Others	249.27	20559-55-1	free base	Oxibendazole is a broad-spectrum anthelmintic	C1(=CC=C2C(=C1)NC(=N2)NC(OC)=O)OCCC	10	http://www.selleckchem.com/products/oxibendazole.html
299	1499	L2000-19	f11	11	6	20170424	1	28	33		B8:13	A1:16, B:O7, B:O14, N1:6, O1:6	[1:20, 34:20:294, 27:20:287, 261:266, 281:286]	Nicotinamide (Vitamin B3)	S1899	other	Others	Others	122.12	98-92-0	free base	Nicotinamide (Vitamin B3) is a water-soluble vitamin and is part of the vitamin B group.	C1=CN=CC(=C1)C(N)=O	196	http://www.selleckchem.com/products/Nicotinamide(Niacinamide).html
300	1500	L2000-19	g2	2	7	20170424	1	201	206		K1:6	A1:16, B:O7, B:O14, N1:6, O1:6	[1:20, 34:20:294, 27:20:287, 261:266, 281:286]	Calcifediol	S1469	other	Others	Others	400.64	19356-17-3	free base	Calcifediol is a major circulating metabolite of vitamin D3 and acts as a competitive inhibitor with an apparent Ki of 3.9 μM. It also suppresses PTH secretion and mRNA (ED50=2 nM)	C1[C@H](CCC(C/1=C/C=C2/[C@]3([C@](CCC2)([C@]([C@@H](CCCC(C)(C)O)C)(CC3)[H])C)[H])=C)O	199	http://www.selleckchem.com/products/Calcifediol.html
301	1501	L2000-19	g3	3	7	20170424	1	181	186		J1:6	A1:16, B:O7, B:O14, N1:6, O1:6	[1:20, 34:20:294, 27:20:287, 261:266, 281:286]	Furosemide	S1603	other	Others	Others	330.74	54-31-9	free base	Furosemide(Lasix) is a loop diuretic used in the treatment of congestive heart failure and edema.	C1(=CC(=C(C=C1NCC2=CC=CO2)Cl)S(N)(=O)=O)C(O)=O	199	http://www.selleckchem.com/products/Furosemide(Lasix).html
302	1502	L2000-19	g4	4	7	20170424	1	161	166		I1:6	A1:16, B:O7, B:O14, N1:6, O1:6	[1:20, 34:20:294, 27:20:287, 261:266, 281:286]	Ursodiol	S1643	other	Others	Others	392.57	128-13-2	free base	Ursodiol reduces cholesterol absorption and is used to dissolve (cholesterol) gallstones. (IC50=0.22 μM	C1[C@H](C[C@@]2([C@](C1)([C@]3([C@@]([C@H](C2)O)([C@]4([C@](CC3)([C@@](CC4)([C@H](C)CCC(O)=O)[H])C)[H])[H])[H])C)[H])O	201	http://www.selleckchem.com/products/Ursodiol(Actigal).html
303	1503	L2000-19	g5	5	7	20170424	1	141	146		H1:6	A1:16, B:O7, B:O14, N1:6, O1:6	[1:20, 34:20:294, 27:20:287, 261:266, 281:286]	Lubiprostone	S1675	other	Others	Others	390.46	136790-76-6	free base	Lubiprostone(Amitiza) is a gastrointestinal agent used for the treatment of idiopathic chronic constipation.	C1(C[C@H]([C@@H]([C@@H]1CCCCCCC(O)=O)CCC(C(CCCC)(F)F)=O)O)=O	199	http://www.selleckchem.com/products/Lubiprostone(Amitiza).html
304	1504	L2000-19	g6	6	7	20170424	1	121	126		G1:6	A1:16, B:O7, B:O14, N1:6, O1:6	[1:20, 34:20:294, 27:20:287, 261:266, 281:286]	Glyburide	S1716	other	Others	Others	494	10238-21-8	free base	Glyburide (Diabeta) is an anti-diabetic compound in a class of medications known as sulfonylureas, closely related to sulfa agents.	C1CCCC(C1)NC(NS(C2=CC=C(C=C2)CCNC(C3=C(C=CC(=C3)Cl)OC)=O)(=O)=O)=O	200	http://www.selleckchem.com/products/Glyburide(Diabeta).html
305	1505	L2000-19	g7	7	7	20170424	1	101	106		F1:6	A1:16, B:O7, B:O14, N1:6, O1:6	[1:20, 34:20:294, 27:20:287, 261:266, 281:286]	Thiabendazole	S1739	other	Others	Others	201.25	148-79-8	free base	Thiabendazole inhibites the mitochondrial helminth-specific enzyme, fumarate reductase, with anthelminthic property.	N1=CSC=C1C2NC3=C(N=2)C=CC=C3	198	http://www.selleckchem.com/products/Thiabendazole.html
306	1506	L2000-19	g8	8	7	20170424	1	81	86		E1:6	A1:16, B:O7, B:O14, N1:6, O1:6	[1:20, 34:20:294, 27:20:287, 261:266, 281:286]	Cefditoren Pivoxil	S1768	other	Others	Others	620.72	117467-28-4	free base	Cefditoren pivoxil is used to treat uncomplicated skin and skin structure infections, etc.	N12[C@](SCC(=C1C(=O)OCOC(C(C)(C)C)=O)\C=C/C3SC=NC=3C)([C@H](C2=O)NC(=O)/C(=N\OC)C4=CSC(=N4)N)[H]	199	http://www.selleckchem.com/products/Cefditoren-pivoxil.html
307	1507	L2000-19	g9	9	7	20170424	1	61	66		D1:6	A1:16, B:O7, B:O14, N1:6, O1:6	[1:20, 34:20:294, 27:20:287, 261:266, 281:286]	Oxfendazole	S1830	other	Others	Others	315.35	53716-50-0	free base	Oxfendazole is the sulfoxide form of fenbendazole which is a broad spectrum benzimidazole anthelmintic.	S(C1=CC2=C(C=C1)N=C(N2)NC(OC)=O)(C3=CC=CC=C3)=O	31	http://www.selleckchem.com/products/oxfendazole.html
308	1508	L2000-19	g10	10	7	20170424	1	41	46		C1:6	A1:16, B:O7, B:O14, N1:6, O1:6	[1:20, 34:20:294, 27:20:287, 261:266, 281:286]	Pefloxacin Mesylate	S1855	other	Others	Others	429.46	70458-95-6	mesylate	Pefloxacin mesylate is a synthetic chemotherapeutic agent and an antibacterial agent with IC50 of 6.7 nM.	C1(=C(C=C2C(=C1)C(C(=CN2CC)C(=O)O)=O)N3CCN(CC3)C)F.S(C)(=O)(=O)O	32	http://www.selleckchem.com/products/pefloxacin-mesylate.html
309	1509	L2000-19	g11	11	7	20170424	1	21	26		B1:6	A1:16, B:O7, B:O14, N1:6, O1:6	[1:20, 34:20:294, 27:20:287, 261:266, 281:286]	Talc	S1900	other	Others	Others	379.27	14807-96-6	free base	Talc is a mineral composed of hydrated magnesium silicate with the chemical formula H2Mg3(SiO3)4 or Mg3Si4O10(OH)2.	O=[Mg].O=[Mg].O=[Mg].[Si](=O)=O.[Si](=O)=O.[Si](=O)=O.[Si](=O)=O.O	10	http://www.selleckchem.com/products/Talc.html
310	1510	L2000-19	h2	2	8	20170424	1	295	300		O15:20	A1:16, B:O7, B:O14, N1:6, O1:6	[1:20, 34:20:294, 27:20:287, 261:266, 281:286]	Iloperidone	S1483	other	Others	Others	426.48	133454-47-4	free base	Iloperidone is an atypical antipsychotic for the treatment of schizophrenia.	C1(=C(C=CC(=C1)C(C)=O)OCCCN2CCC(CC2)C3=NOC4=C3C=CC(=C4)F)OC	63	http://www.selleckchem.com/products/Iloperidone(Fanapt).html
311	1511	L2000-19	h3	3	8	20170424	1	275	280		M15:20	A1:16, B:O7, B:O14, N1:6, O1:6	[1:20, 34:20:294, 27:20:287, 261:266, 281:286]	Methimazole	S1609	other	Others	Others	114.17	60-56-0	free base	Methimazole(Tapazole, Northyx) is an antithyroid medicine.	N1C=CN(C1=S)C	201	http://www.selleckchem.com/products/Methimazole(Tapazole).html
312	1512	L2000-19	h4	4	8	20170424	1	255	260		N15:20	A1:16, B:O7, B:O14, N1:6, O1:6	[1:20, 34:20:294, 27:20:287, 261:266, 281:286]	Adenosine	S1647	other	Others	Others	267.24	58-61-7	free base	Adenosine is a nucleoside composed of a molecule of adenine attached to a ribose sugar molecule (ribofuranose) moiety via a β-N9-glycosidic bond.	O1[C@@H]([C@H]([C@H]([C@H]1N2C3=C(N=C2)C(=NC=N3)N)O)O)CO	44	http://www.selleckchem.com/products/Adenosine(Adenocard).html
313	1513	L2000-19	h5	5	8	20170424	1	235	240		L15:20	A1:16, B:O7, B:O14, N1:6, O1:6	[1:20, 34:20:294, 27:20:287, 261:266, 281:286]	Mesalamine	S1681	other	Others	Others	153.14	89-57-6	free base	Mesalamine is an anti-inflammatory compound.	C1=C(C(=CC=C1N)O)C(O)=O	202	http://www.selleckchem.com/products/Mesalamine(Lialda).html
314	1514	L2000-19	h6	6	8	20170424	1	288	293		O8:13	A1:16, B:O7, B:O14, N1:6, O1:6	[1:20, 34:20:294, 27:20:287, 261:266, 281:286]	Indomethacin	S1723	other	Others	Others	357.79	53-86-1	free base	Indomethacin(Indocid, Indocin) is a non-steroidal anti-inflammatory compound commonly used to reduce fever, pain, stiffness, and swelling.	C1=C(C=C2C(=C1)N(C(=C2CC(O)=O)C)C(C3=CC=C(C=C3)Cl)=O)OC	201	http://www.selleckchem.com/products/Indomethacin(Indocid).html
315	1515	L2000-19	h7	7	8	20170424	1	268	273		N8:13	A1:16, B:O7, B:O14, N1:6, O1:6	[1:20, 34:20:294, 27:20:287, 261:266, 281:286]	Guaifenesin	S1740	other	Others	Others	198.22	93-14-1	free base	Guaifenesin(Guaiphenesin) is thought to act as an expectorant.	C1=CC(=C(C=C1)OCC(CO)O)OC	201	http://www.selleckchem.com/products/Guaifenesin(Guaiphenesin).html
316	1516	L2000-19	h8	8	8	20170424	1	248	253		M8:13	A1:16, B:O7, B:O14, N1:6, O1:6	[1:20, 34:20:294, 27:20:287, 261:266, 281:286]	Fenofibrate	S1794	other	Others	Others	360.83	49562-28-9	free base	Fenofibrate (Tricor, Trilipix) is a compound of the fibrate class and fibric acid derivative.	C1=C(C=CC(=C1)C(C2=CC=C(C=C2)OC(C(OC(C)C)=O)(C)C)=O)Cl	199	http://www.selleckchem.com/products/Fenofibrate(Tricor).html
317	1517	L2000-19	h9	9	8	20170424	1	228	233		L8:13	A1:16, B:O7, B:O14, N1:6, O1:6	[1:20, 34:20:294, 27:20:287, 261:266, 281:286]	Atracurium Besylate	S1832	other	Others	Others	1243.48	64228-81-5	besylate	Atracurium Besylate is a neuromuscular blocking agent with ED95 of 0.2 mg/kg.	C1(=C(C=C2C(=C1)CC[N+](C2CC3=CC=C(C(=C3)OC)OC)(CCC(OCCCCCOC(CC[N+]4(C(C5=CC(=C(C=C5CC4)OC)OC)CC6=CC=C(C(=C6)OC)OC)C)=O)=O)C)OC)OC.C7(=CC=CC=C7S([O-])(=O)=O).C8=CC=CC=C8S([O-])(=O)=O	10	http://www.selleckchem.com/products/atracurium-besylate.html
318	1518	L2000-19	h10	10	8	20170424	1	241	246		M1:6	A1:16, B:O7, B:O14, N1:6, O1:6	[1:20, 34:20:294, 27:20:287, 261:266, 281:286]	Diethylstilbestrol	S1859	other	Others	Others	268.35	56-53-1	free base	Diethylstilbestrol, a synthetic nonsteroidal estrogen used in the treatment of menopausal and postmenopausal disorders.	C1(=CC=C(C=C1)/C(=C(/C2=CC=C(C=C2)O)CC)CC)O	201	http://www.selleckchem.com/products/Diethylstilbestrol(Stilbestrol).html
319	1519	L2000-19	h11	11	8	20170424	1	221	226		L1:6	A1:16, B:O7, B:O14, N1:6, O1:6	[1:20, 34:20:294, 27:20:287, 261:266, 281:286]	Vitamin B12	S1902	other	Others	Others	1355.37	68-19-9	free base	Vitamin B12 is a water soluble vitamin with a key role in the normal functioning of the brain and nervous system, and for the formation of blood.	[C@H]1([C@](C2=N[C@@]1([C@]3([C@]([C@@H](/C([N-]3)=C(/C4[C@@]([C@@H](/C(N=4)=C/C5C([C@@H](/C(N=5)=C/2C)CCC(N)=O)(C)C)CCC(N)=O)(C)CC(N)=O)C)CCC(N)=O)(CC(N)=O)C)C)[H])(CCC(NC[C@H](OP(O[C@H]6[C@H]([C@H](O[C@H]6CO)N7C=NC8=C7C=C(C(=C8)C)C)O)([O-])=O)C)=O)C)CC(N)=O.[Co+2]C#N	55	http://www.selleckchem.com/products/Vitamin-B12.html
320	1520	L2000-20	a2	2	1	20170425	0	215	220		K15:20	A1:16, B:O7, B:O14, N1:6, O1:6	[1:20, 34:20:294, 27:20:287, 261:266, 281:286]	Avobenzone	S1904	other	Others	Others	310.39	70356-09-1	free base	Avobenzone is an oil soluble ingredient used in sunscreen products to absorb the full spectrum of UVA rays and a dibenzoylmethane derivative.	C1=C(C=CC(=C1)C(CC(C2=CC=C(C=C2)C(C)(C)C)=O)=O)OC	199	http://www.selleckchem.com/products/Avobenzone(Parsol-1789).html
321	1521	L2000-20	a3	3	1	20170425	0	195	200		J15:20	A1:16, B:O7, B:O14, N1:6, O1:6	[1:20, 34:20:294, 27:20:287, 261:266, 281:286]	Methoxsalen	S1952	other	Others	Others	216.19	298-81-7	free base	Methoxsalen (Oxsoralen) a naturally occurring furocoumarin compound found in several species of plants, including Psoralea corylifolia, is an agent used to treat psoriasis, eczema, vitiligo and some cutaneous Lymphomas in conjunction with exposing the skin to sunlight.	C1C(OC2=C(C=1)C=C3C(=C2OC)OC=C3)=O	198	http://www.selleckchem.com/products/Methoxsalen(Oxsoralen).html
322	1522	L2000-20	a4	4	1	20170425	0	175	180		I15:20	A1:16, B:O7, B:O14, N1:6, O1:6	[1:20, 34:20:294, 27:20:287, 261:266, 281:286]	Fluticasone propionate	S1992	other	Others	Others	500.57	80474-14-2	propionate	Fluticasone propionate (Flonase, Veramyst) is a synthetic corticosteroid which is derived from fluticasone used to treat asthma and allergic rhinitis (hay fever).	C1C(C=C2[C@](C=1)([C@]3([C@@](C[C@@H]2F)([C@]4([C@](C[C@H]3O)([C@@]([C@@H](C4)C)(C(SCF)=O)OC(CC)=O)C)[H])[H])F)C)=O	199	http://www.selleckchem.com/products/fluticasone-propionate-Flonase-Veramyst.html
323	1523	L2000-20	a5	5	1	20170425	0	155	160		H15:20	A1:16, B:O7, B:O14, N1:6, O1:6	[1:20, 34:20:294, 27:20:287, 261:266, 281:286]	Aspartame	S2036	other	Others	Others	294.3	22839-47-0	free base	Aspartame is an artificial, non-saccharide sweetener used as a sugar substitute in some foods and beverages.	C(C[C@@H](C(N[C@H](C(OC)=O)CC1=CC=CC=C1)=O)N)(O)=O	112	http://www.selleckchem.com/products/aspartame.html
324	1524	L2000-20	a6	6	1	20170425	0	135	140		G15:20	A1:16, B:O7, B:O14, N1:6, O1:6	[1:20, 34:20:294, 27:20:287, 261:266, 281:286]	Argatroban	S2069	other	Others	Others	508.63	74863-84-6	free base	Argatroban is an anticoagulant that is a small molecule direct thrombin inhibitor.	NC(NCCC[C@@](C(N1CC[C@H](C[C@H]1C(=O)O)C)=O)(NS(C2=CC=CC3=C2NCC(C3)C)(=O)=O)[H])=N	17	http://www.selleckchem.com/products/argatroban.html
325	1525	L2000-20	a7	7	1	20170425	0	115	120		F15:20	A1:16, B:O7, B:O14, N1:6, O1:6	[1:20, 34:20:294, 27:20:287, 261:266, 281:286]	Mestranol	S2125	other	Others	Others	310.43	72-33-3	free base	Mestranol is the 3-methyl ether of ethinylestradiol. It was the estrogen used in many of the first oral contraceptives.	C1C(=CC2=C(C=1)[C@]3([C@@](CC2)([C@]4([C@](CC3)([C@](CC4)(C#C)O)C)[H])[H])[H])OC	48	http://www.selleckchem.com/products/Mestranol.html
326	1526	L2000-20	a8	8	1	20170425	0	95	100		E15:20	A1:16, B:O7, B:O14, N1:6, O1:6	[1:20, 34:20:294, 27:20:287, 261:266, 281:286]	Laetrile	S2260	other	Others	Others	457.43	29883-15-6	free base	Laetrile is a glycoside initially isolated from the seeds of the tree Prunus dulcis, also known as bitter almonds.	[C@H]1([C@H]([C@@H](O[C@@H]([C@@H]1O)CO)OC[C@@H]2[C@H]([C@@H]([C@H]([C@@H](O2)O[C@H](C3=CC=CC=C3)C#N)O)O)O)O)O	201	http://www.selleckchem.com/products/Amygdalin.html
327	1527	L2000-20	a9	9	1	20170425	0	75	80		D15:20	A1:16, B:O7, B:O14, N1:6, O1:6	[1:20, 34:20:294, 27:20:287, 261:266, 281:286]	Bilobalide	S2276	other	Others	Others	326.3	33570-04-6	free base	Bilobalide is a biologically active terpenic trilactone present in Ginkgo biloba.	O1C([C@@]23C4([C@@]1(OC([C@@H]4O)=O)[H])[C@](C[C@@]2(OC(C3)=O)[H])(C(C)(C)C)O)=O	199	http://www.selleckchem.com/products/Bilobalide.html
328	1528	L2000-20	a10	10	1	20170425	0	55	60		C15:20	A1:16, B:O7, B:O14, N1:6, O1:6	[1:20, 34:20:294, 27:20:287, 261:266, 281:286]	DL-Carnitine HCl	S2293	other	Others	Others	197.66	461-05-2	hydrochloride	DL-Carnitine hydrochloride is a quaternary ammonium compound biosynthesized from the amino acids lysine and methionine.	OC(CC(O)C[N+](C)(C)C)=O.[Cl-]	202	http://www.selleckchem.com/products/DL-Carnitine-hydrochloride.html
329	1529	L2000-20	a11	11	1	20170425	0	35	40		B15:20	A1:16, B:O7, B:O14, N1:6, O1:6	[1:20, 34:20:294, 27:20:287, 261:266, 281:286]	Gramine	S2304	other	Others	Others	174.24	87-52-5	free base	Gramine is a naturally occurring indole alkaloid present in several plant species.	C12=C(C=CC=C1)NC=C2CN(C)C	200	http://www.selleckchem.com/products/Gramine.html
330	1530	L2000-20	b2	2	2	20170425	0	208	213		K8:13	A1:16, B:O7, B:O14, N1:6, O1:6	[1:20, 34:20:294, 27:20:287, 261:266, 281:286]	Crystal Violet	S1917	other	Others	Others	407.98	548-62-9	chlorate	Crystal violet is a triarylmethane dye.	C1(=CC(=CC=C1N(C)C)C(C2=CC=C(C=C2)N(C)C)=C3C=CC(C=C3)=[N+](C)C).[Cl-]	200	http://www.selleckchem.com/products/Crystal-violet.html
331	1531	L2000-20	b3	3	2	20170425	0	188	193		J8:13	A1:16, B:O7, B:O14, N1:6, O1:6	[1:20, 34:20:294, 27:20:287, 261:266, 281:286]	Pranoprofen	S1960	other	Others	Others	255.27	52549-17-4	free base	Pranoprofen is a PGE2 inhibitor with IC50 of 7.5 μM.	C1=CN=C2C(=C1)CC3=C(O2)C=CC(=C3)C(C(O)=O)C	199	http://www.selleckchem.com/products/pranoprofen.html
332	1532	L2000-20	b4	4	2	20170425	0	168	173		I8:13	A1:16, B:O7, B:O14, N1:6, O1:6	[1:20, 34:20:294, 27:20:287, 261:266, 281:286]	Sulindac	S2007	other	Others	Others	356.41	38194-50-2	free base	Sulindac (Clinoril) is a non-steroidal anti-inflammatory agent of the arylalkanoic acid class.	C1=CC(=CC=C1/C=C2\C3=C(C(=C2C)CC(=O)O)C=C(C=C3)F)S(C)=O	199	http://www.selleckchem.com/products/Sulindac(Clinoril).html
333	1533	L2000-20	b5	5	2	20170425	0	148	153		H8:13	A1:16, B:O7, B:O14, N1:6, O1:6	[1:20, 34:20:294, 27:20:287, 261:266, 281:286]	Dyclonine HCl	S2041	other	Others	Others	325.87	536-43-6	hydrochloride	Dyclonine hydrochloride is a hydrochloride salt form of dyclonine which is an oral anaesthetic.	C1(=C(C=CC(=C1)C(CCN2CCCCC2)=O)OCCCC).Cl	46	http://www.selleckchem.com/products/dyclonine-hydrochloride.html
334	1534	L2000-20	b6	6	2	20170425	0	128	133		G8:13	A1:16, B:O7, B:O14, N1:6, O1:6	[1:20, 34:20:294, 27:20:287, 261:266, 281:286]	Mecarbinate	S2074	other	Others	Others	233.26	15574-49-9	free base	Mecarbinate is a chemical intermediate of arbidol hydrochloride.	C1=C(C=C2C(=C1)N(C(=C2C(=O)OCC)C)C)O	201	http://www.selleckchem.com/products/mecarbinate.html
335	1535	L2000-20	b7	7	2	20170425	0	108	113		F8:13	A1:16, B:O7, B:O14, N1:6, O1:6	[1:20, 34:20:294, 27:20:287, 261:266, 281:286]	Dichlorphenamide	S2177	other	Others	Others	305.16	120-97-8	free base	Dichlorphenamide is a sulfonamide and a carbonic anhydrase inhibitor of the meta-Disulfamoylbenzene class.	C1(=C(C(=CC(=C1)S(N)(=O)=O)S(N)(=O)=O)Cl)Cl	199	http://www.selleckchem.com/products/Dichlorphenamide(Diclofenamide).html
336	1536	L2000-20	b8	8	2	20170425	0	88	93		E8:13	A1:16, B:O7, B:O14, N1:6, O1:6	[1:20, 34:20:294, 27:20:287, 261:266, 281:286]	Andrographolide	S2261	other	Others	Others	350.45	5508-58-7	free base	Andrographolide is a labdane diterpenoid that is the main bioactive component of the medicinal plant Andrographis paniculata.	[C@@H]1([C@]([C@@]2([C@@](CC1)([C@H](C(CC2)=C)C/C=C3/C(OCC3O)=O)C)[H])(CO)C)O	199	http://www.selleckchem.com/products/Andrographolide.html
337	1537	L2000-20	b9	9	2	20170425	0	68	73		D8:13	A1:16, B:O7, B:O14, N1:6, O1:6	[1:20, 34:20:294, 27:20:287, 261:266, 281:286]	Caffeic Acid	S2277	other	Others	Others	180.16	331-39-5	free base	Caffeic acid is a hydroxycinnamic acid, a naturally occurring organic compound.	C1=C(C(=CC(=C1)/C=C/C(O)=O)O)O	10	http://www.selleckchem.com/products/Caffeic-acid.html
338	1538	L2000-20	b10	10	2	20170425	0	48	53		C8:13	A1:16, B:O7, B:O14, N1:6, O1:6	[1:20, 34:20:294, 27:20:287, 261:266, 281:286]	Emodin	S2295	other	Others	Others	270.24	518-82-1	free base	Emodin is a purgative resin, 6-methyl-1,3,8-trihydroxyanthraquinone, from rhubarb, the buckthorn and Japanese Knotweed (Fallopia japonica).	C12=C(C(C3=C(C1=O)C(=CC(=C3)C)O)=O)C=C(C=C2O)O	199	http://www.selleckchem.com/products/Emodin.html
339	1539	L2000-20	b11	11	2	20170425	0	28	33		B8:13	A1:16, B:O7, B:O14, N1:6, O1:6	[1:20, 34:20:294, 27:20:287, 261:266, 281:286]	Gynostemma Extract	S2306	other	Others	Others	917.13	80321-63-7	free base	Gynostemma Extract is a saponins extract derived from the Gynostemma pentaphyllum.	C1[C@@H](C([C@]2([C@](C1)([C@]3([C@@](CC2)([C@]4([C@]([C@@H](C3)O)([C@@H](CC4)[C@](O[C@@H]5O[C@@H]([C@H]([C@@H]([C@@H]5O)O)O)CO[C@@H]6OC[C@H]([C@@H]([C@@H]6O)O)O)(C)CCC=C(C)C)[H])C)C)[H])C)[H])(C)C)O[C@@H]7O[C@@H]([C@H]([C@@H]([C@@H]7O)O)O)CO	206	http://www.selleckchem.com/products/Gynostemma-Extract.html
340	1540	L2000-20	c2	2	3	20170425	0	201	206		K1:6	A1:16, B:O7, B:O14, N1:6, O1:6	[1:20, 34:20:294, 27:20:287, 261:266, 281:286]	Haloperidol	S1920	other	Others	Others	375.86	52-86-8	free base	Haloperidol (Haldol) is an antipsychotic and butyrophenone.	C1(=CC=C(C=C1)C(=O)CCCN2CCC(CC2)(C3=CC=C(C=C3)Cl)O)F	199	http://www.selleckchem.com/products/Haloperidol(Haldol).html
341	1541	L2000-20	c3	3	3	20170425	0	181	186		J1:6	A1:16, B:O7, B:O14, N1:6, O1:6	[1:20, 34:20:294, 27:20:287, 261:266, 281:286]	Sulphadimethoxine	S1962	other	Others	Others	310.33	122-11-2	free base	Sulphadimethoxine is a non-reducing glucuronide.	N(C1=NC(=NC(=C1)OC)OC)S(C2=CC=C(C=C2)N)(=O)=O	199	http://www.selleckchem.com/products/sulphadimethoxine.html
342	1542	L2000-20	c4	4	3	20170425	0	161	166		I1:6	A1:16, B:O7, B:O14, N1:6, O1:6	[1:20, 34:20:294, 27:20:287, 261:266, 281:286]	Suplatast Tosylate	S2015	other	Others	Others	499.64	94055-76-2	tosylate	Suplatast Tosilate is a novel capsular anti-asthmatic agent that suppresses both IgE production, IL-4 and IL-5 synthesis with IC50 above 100 μM.	C1(=CC(=CC=C1NC(CC[S+](C)C)=O)OCC(O)COCC).C2=CC(=CC=C2S(=O)(=O)[O-])C	200	http://www.selleckchem.com/products/suplatast-tosilate.html
343	1543	L2000-20	c5	5	3	20170425	0	141	146		H1:6	A1:16, B:O7, B:O14, N1:6, O1:6	[1:20, 34:20:294, 27:20:287, 261:266, 281:286]	Doxifluridine	S2045	other	Others	Others	246.19	9/5/3094	free base	Doxifluridine is a thymidine phosphorylase activator for PC9-DPE2 cells with IC50 of 0.62 μM.	N1C(C(=CN(C1=O)[C@@H]2O[C@@H]([C@H]([C@@H]2O)O)C)F)=O	199	http://www.selleckchem.com/products/doxifluridine.html
344	1544	L2000-20	c6	6	3	20170425	0	121	126		G1:6	A1:16, B:O7, B:O14, N1:6, O1:6	[1:20, 34:20:294, 27:20:287, 261:266, 281:286]	Adiphenine HCl	S2082	other	Others	Others	347.88	50-42-0	hydrochloride	Adiphenine is a nicotinic receptor inhibitor with IC50 of 15 µM, used as an antispasmodic drug.	C(C(C1=CC=CC=C1)C2=CC=CC=C2)(OCCN(CC)CC)=O.Cl	86	http://www.selleckchem.com/products/adiphenine-hcl.html
345	1545	L2000-20	c7	7	3	20170425	0	101	106		F1:6	A1:16, B:O7, B:O14, N1:6, O1:6	[1:20, 34:20:294, 27:20:287, 261:266, 281:286]	Eltrombopag	S2229	other	Others	Others	442.47	496775-61-2	free base	Eltrombopag is a member of the biarylhydrazone class, which is a nonpeptide agonist of the thrombopoietin receptor (TpoR).	C1=C(C(=C(C=C1)C2=CC=CC(=C2)C(O)=O)O)N/N=C3/C(N(N=C3C)C4=CC=C(C(=C4)C)C)=O	201	http://www.selleckchem.com/products/Eltrombopag-SB-497115-GR.html
346	1546	L2000-20	c8	8	3	20170425	0	81	86		E1:6	A1:16, B:O7, B:O14, N1:6, O1:6	[1:20, 34:20:294, 27:20:287, 261:266, 281:286]	Arbutin	S2263	other	Others	Others	272.25	497-76-7	free base	Arbutin is a tyrosinase inhibitor with an IC50 of 1.09 mM.	[C@H]1([C@H]([C@@H]([C@H]([C@@H](O1)OC2=CC=C(C=C2)O)O)O)O)CO	202	http://www.selleckchem.com/products/Arbutin(Uva,-p-Arbutin).html
347	1547	L2000-20	c9	9	3	20170425	0	61	66		D1:6	A1:16, B:O7, B:O14, N1:6, O1:6	[1:20, 34:20:294, 27:20:287, 261:266, 281:286]	Chlorogenic Acid	S2280	other	Others	Others	354.31	327-97-9	free base	Chlorogenic acid is a hydroxycinnamic acid and a member of a family of naturally occurring organic compounds.	C1[C@H]([C@H]([C@@H](C[C@]1(C(=O)O)O)OC(/C=C/C2=CC(=C(C=C2)O)O)=O)O)O	10	http://www.selleckchem.com/products/Chlorogenic-acid.html
348	1548	L2000-20	c10	10	3	20170425	0	41	46		C1:6	A1:16, B:O7, B:O14, N1:6, O1:6	[1:20, 34:20:294, 27:20:287, 261:266, 281:286]	Enoxolone	S2296	other	Others	Others	470.68	471-53-4	free base	Enoxolone is a pentacyclic triterpenoid derivative of the beta-amyrin type obtained from the hydrolysis of glycyrrhizic acid, which was obtained from the herb liquorice.	C1[C@@](C([C@]2([C@](C1)([C@]3([C@@](CC2)([C@]4(C(=CC3=O)[C@@]5([C@@](CC4)(CC[C@](C5)(C)C(O)=O)C)[H])C)C)[H])C)[H])(C)C)(O)[H]	199	http://www.selleckchem.com/products/Enoxolone(Glycyrrhetin).html
349	1549	L2000-20	c11	11	3	20170425	0	21	26		B1:6	A1:16, B:O7, B:O14, N1:6, O1:6	[1:20, 34:20:294, 27:20:287, 261:266, 281:286]	Hesperidin	S2309	other	Others	Others	610.56	520-26-3	free base	Hesperidin is a flavanone glycoside found abundantly in citrus fruits.	[C@H]1([C@H]([C@@H]([C@H]([C@@H](O1)OC2=CC(=C3C(=C2)O[C@@H](CC3=O)C4=CC=C(C(=C4)O)OC)O)O)O)O)CO[C@H]5[C@H](O)[C@H]([C@H]([C@@H](O5)C)O)O	199	http://www.selleckchem.com/products/Hesperidin.html
350	1550	L2000-20	d2	2	4	20170425	0	295	300		O15:20	A1:16, B:O7, B:O14, N1:6, O1:6	[1:20, 34:20:294, 27:20:287, 261:266, 281:286]	Phenindione	S1921	other	Others	Others	222.24	83-12-5	free base	Phenindione is an anticoagulant which functions as a Vitamin K antagonist.	C1=CC=C2C(=C1)C(C(C2=O)C3=CC=CC=C3)=O	197	http://www.selleckchem.com/products/Phenindione(Rectadione).html
351	1551	L2000-20	d3	3	4	20170425	0	275	280		M15:20	A1:16, B:O7, B:O14, N1:6, O1:6	[1:20, 34:20:294, 27:20:287, 261:266, 281:286]	Primidone	S1965	other	Others	Others	218.25	125-33-7	free base	Primidone(Mysoline) is an anticonvulsant of the pyrimidinedione class.	C1NC(C(C(N1)=O)(CC)C2=CC=CC=C2)=O	201	http://www.selleckchem.com/products/Primidone(Mysoline).html
352	1552	L2000-20	d4	4	4	20170425	0	255	260		N15:20	A1:16, B:O7, B:O14, N1:6, O1:6	[1:20, 34:20:294, 27:20:287, 261:266, 281:286]	Mirtazapine	S2016	other	Others	Others	265.35	85650-52-8	free base	Mirtazapine is a potent tetracyclic antidepressant.	C1C2=C(N3C(C4=C1C=CC=C4)CN(CC3)C)N=CC=C2	199	http://www.selleckchem.com/products/mirtazapine-remeron-avanza.html
353	1553	L2000-20	d5	5	4	20170425	0	235	240		L15:20	A1:16, B:O7, B:O14, N1:6, O1:6	[1:20, 34:20:294, 27:20:287, 261:266, 281:286]	Cytidine	S2053	other	Others	Others	243.22	65-46-3	free base	Cytidine is a nucleoside molecule that is formed when cytosine is attached to a ribose ring, cytidine is a component of RNA.	C1(N(C=CC(=N1)N)[C@@H]2O[C@@H]([C@H]([C@@H]2O)O)CO)=O	201	http://www.selleckchem.com/products/cytidine.html
354	1554	L2000-20	d6	6	4	20170425	0	288	293		O8:13	A1:16, B:O7, B:O14, N1:6, O1:6	[1:20, 34:20:294, 27:20:287, 261:266, 281:286]	Dronedarone HCl	S2114	other	Others	Others	593.22	141625-93-6	hydrochloride	Dronedarone HCl is a therapy for the treatment of patients with paroxysmal and persistent atrial fibrillation or atrial flutter.	C1(=CC=C2C(=C1)C(=C(O2)CCCC)C(=O)C3=CC=C(C=C3)OCCCN(CCCC)CCCC)NS(=O)(C)=O.Cl	134	http://www.selleckchem.com/products/dronedarone-hcl-multaq.html
355	1555	L2000-20	d7	7	4	20170425	0	268	273		N8:13	A1:16, B:O7, B:O14, N1:6, O1:6	[1:20, 34:20:294, 27:20:287, 261:266, 281:286]	(+)-Usniacin	S2252	other	Others	Others	344.32	7562-61-0	free base	(+)-Usniacin is a naturally occurring dibenzofuran derivative found in several lichen species.	C1(C(C=C2[C@@](C=1O)(C3=C(O2)C(=C(C(=C3O)C)O)C(C)=O)C)=O)C(=O)C	10	http://www.selleckchem.com/products/(+)-Usniacin(D-Usnic-acid).html
356	1556	L2000-20	d8	8	4	20170425	0	248	253		M8:13	A1:16, B:O7, B:O14, N1:6, O1:6	[1:20, 34:20:294, 27:20:287, 261:266, 281:286]	Artesunate	S2265	other	Others	Others	384.42	88495-63-0	free base	Artesunate is a part of the artemisinin group of agents with an IC50 of < 5 μM for small cell lung carcinoma cell line H69.	[C@]12([C@]34[C@@](CC[C@@]1(C)[H])([C@]([C@H](O[C@@](O[C@@](CC2)(OO3)C)4[H])OC(=O)CCC(O)=O)([H])C)[H])[H]	200	http://www.selleckchem.com/products/Artesunate.html
357	1557	L2000-20	d9	9	4	20170425	0	228	233		L8:13	A1:16, B:O7, B:O14, N1:6, O1:6	[1:20, 34:20:294, 27:20:287, 261:266, 281:286]	Chrysin	S2281	other	Others	Others	254.24	480-40-0	free base	Chrysin is a naturally occurring flavone chemically extracted from the blue passion flower (Passiflora caerulea).	C1=C(C2=C(C=C1O)OC(=CC2=O)C3=CC=CC=C3)O	10	http://www.selleckchem.com/products/Chrysin.html
358	1558	L2000-20	d10	10	4	20170425	0	241	246		M1:6	A1:16, B:O7, B:O14, N1:6, O1:6	[1:20, 34:20:294, 27:20:287, 261:266, 281:286]	Ergosterol	S2297	other	Others	Others	396.65	57-87-4	free base	Ergosterol is a sterol and a biological precursor (a provitamin) to vitamin D2.	C1[C@@H](CC2[C@](C1)([C@]3(C(=CC=2)[C@]4([C@](CC3)([C@@](CC4)([C@@H](/C=C/[C@@H](C(C)C)C)C)[H])C)[H])[H])C)O	10	http://www.selleckchem.com/products/Ergosterol.html
359	1559	L2000-20	d11	11	4	20170425	0	221	226		L1:6	A1:16, B:O7, B:O14, N1:6, O1:6	[1:20, 34:20:294, 27:20:287, 261:266, 281:286]	Hyodeoxycholic acid (HDCA)	S2311	other	Others	Others	392.57	83-49-8	free base	Hyodeoxycholic(HDCA) acid is a secondary bile acid, one of the metabolic byproducts of intestinal bacteria.	C1[C@H](C[C@@]2([C@](C1)([C@]3([C@@](C[C@@H]2O)([C@]4([C@](CC3)([C@@H](CC4)[C@H](C)CCC(O)=O)C)[H])[H])[H])C)[H])O	201	http://www.selleckchem.com/products/Hyodeoxycholic-acid(HDCA).html
360	1560	L2000-20	e2	2	5	20170425	1	215	220		K15:20	A1:16, B:O7, B:O14, N1:6, O1:6	[1:20, 34:20:294, 27:20:287, 261:266, 281:286]	Alibendol	S1928	other	Others	Others	251.28	26750-81-2	free base	Alibendol is an antispasmodic,choleretic, and cholekinetic.	C1=C(C(=C(C=C1CC=C)C(=O)NCCO)O)OC	198	http://www.selleckchem.com/products/alibendol.html
361	1561	L2000-20	e3	3	5	20170425	1	195	200		J15:20	A1:16, B:O7, B:O14, N1:6, O1:6	[1:20, 34:20:294, 27:20:287, 261:266, 281:286]	Cyclocytidine HCl	S1973	other	Others	Others	261.66	10212-25-6	hydrochloride	Cyclocytidine is the prodrug of cytarabine, which is a pyrimidine nucleoside analog that inhibits the DNA synthesis and used mainly in the treatment of leukemia.	C1(=CC(N=C2N1[C@H]3[C@@H]([C@H]([C@H](O3)CO)O)O2)=N).Cl	10	http://www.selleckchem.com/products/cyclocytidine-hcl.html
362	1562	L2000-20	e4	4	5	20170425	1	175	180		I15:20	A1:16, B:O7, B:O14, N1:6, O1:6	[1:20, 34:20:294, 27:20:287, 261:266, 281:286]	Chlormezanone	S2021	other	Others	Others	273.74	80-77-3	free base	Chlormezanone(Trancopal)，a non-benzodiazepine that is used in the management of anxiety. It has been suggested for use in the treatment of muscle spasm.	C1=C(C=CC(=C1)C2S(CCC(N2C)=O)(=O)=O)Cl	200	http://www.selleckchem.com/products/Chlormezanone(Trancopal).html
363	1563	L2000-20	e5	5	5	20170425	1	155	160		H15:20	A1:16, B:O7, B:O14, N1:6, O1:6	[1:20, 34:20:294, 27:20:287, 261:266, 281:286]	Bromhexine HCl	S2060	other	Others	Others	412.59	611-75-6	hydrochloride	Bromhexine hydrochloride is a medication prescribed for coughs which works by dissolving hard phlegm.	C1(=CC(=C(C(=C1)CN(C)C2CCCCC2)N)Br)Br.Cl	14	http://www.selleckchem.com/products/bromhexine-hydrochloride.html
364	1564	L2000-20	e6	6	5	20170425	1	135	140		G15:20	A1:16, B:O7, B:O14, N1:6, O1:6	[1:20, 34:20:294, 27:20:287, 261:266, 281:286]	Conivaptan HCl	S2116	other	Others	Others	535.04	168626-94-6	hydrochloride	Conivaptan is a non-peptide inhibitor of antidiuretic hormone (vasopressin receptor antagonist).	C(NC1=CC=C(C=C1)C(N2C3=C(C4=C(CC2)N=C(N4)C)C=CC=C3)=O)(C5=C(C=CC=C5)C6=CC=CC=C6)=O.Cl	199	http://www.selleckchem.com/products/conivaptan-hcl-vaprisol.html
365	1565	L2000-20	e7	7	5	20170425	1	115	120		F15:20	A1:16, B:O7, B:O14, N1:6, O1:6	[1:20, 34:20:294, 27:20:287, 261:266, 281:286]	3-Indolebutyric acid (IBA)	S2253	other	Others	Others	203.24	133-32-4	free base	3-Indolebutyric acid(IBA) is a plant hormone in the auxin family and is an ingredient in many commercial plant rooting horticultural products.	C1=CC=CC2=C1NC=C2CCCC(O)=O	201	http://www.selleckchem.com/products/3-Indolebutyric-acid(IBA).html
366	1566	L2000-20	e8	8	5	20170425	1	95	100		E15:20	A1:16, B:O7, B:O14, N1:6, O1:6	[1:20, 34:20:294, 27:20:287, 261:266, 281:286]	Azomycin	S2267	other	Others	Others	113.07	527-73-1	free base	Azomycin is an antimicrobial antibiotic produced by a strain of Nocardia mesenterica.	O=[N+](C1=NC=CN1)[O-]	203	http://www.selleckchem.com/products/Azomycin(2-Nitroimidazole).html
367	1567	L2000-20	e9	9	5	20170425	1	75	80		D15:20	A1:16, B:O7, B:O14, N1:6, O1:6	[1:20, 34:20:294, 27:20:287, 261:266, 281:286]	Cinchonidine	S2282	other	Others	Others	294.39	485-71-2	free base	Cinchonidine is an alkaloid used in asymmetric synthesis in organic chemistry.	C1=C2C(=CC=C1)N=CC=C2[C@H]([C@]3(N4CCC(C3)[C@](C4)(C=C)[H])[H])O	200	http://www.selleckchem.com/products/Cinchonidine.html
368	1568	L2000-20	e10	10	5	20170425	1	55	60		C15:20	A1:16, B:O7, B:O14, N1:6, O1:6	[1:20, 34:20:294, 27:20:287, 261:266, 281:286]	Fisetin	S2298	other	Others	Others	286.24	528-48-3	free base	Fisetin (Fustel) is a potent sirtuin activating compound (STAC) and an agent that modulates sirtuins.	C12=C(C=C(C=C1)O)OC(=C(C2=O)O)C3=CC(=C(C=C3)O)O	199	http://www.selleckchem.com/products/Fisetin(Fustel).html
369	1569	L2000-20	e11	11	5	20170425	1	35	40		B15:20	A1:16, B:O7, B:O14, N1:6, O1:6	[1:20, 34:20:294, 27:20:287, 261:266, 281:286]	Indole-3-carbinol	S2313	other	Others	Others	147.18	700-06-1	free base	Indole-3-carbinol is produced by the breakdown of the glucosinolate glucobrassicin, which can be found at relatively high levels in cruciferous vegetables.	C1=CC=CC2=C1C(=CN2)CO	197	http://www.selleckchem.com/products/Indole-3-carbinol.html
370	1570	L2000-20	f2	2	6	20170425	1	208	213		K8:13	A1:16, B:O7, B:O14, N1:6, O1:6	[1:20, 34:20:294, 27:20:287, 261:266, 281:286]	Triamcinolone	S1933	other	Others	Others	394.43	124-94-7	free base	Triamcinolone is a glucocorticoid given, as the free alcohol or in esterified form, orally, intramuscularly, by local injection, by inhalation, or applied topically in the management of various disorders in which corticosteroids are indicated.	C1C(C=C2[C@](C=1)([C@]3([C@@](CC2)([C@]4([C@](C[C@H]3O)([C@@]([C@@H](C4)O)(C(CO)=O)O)C)[H])[H])F)C)=O	200	http://www.selleckchem.com/products/Triamcinolone(Aristocort).html
371	1571	L2000-20	f3	3	6	20170425	1	188	193		J8:13	A1:16, B:O7, B:O14, N1:6, O1:6	[1:20, 34:20:294, 27:20:287, 261:266, 281:286]	Meglumine	S1974	other	Others	Others	195.21	6284-40-8	free base	Meglumine is an amino sugar derived from sorbitol for THP-1 cells with IC50 of 22 μg/mL.	CNC[C@@H]([C@H]([C@@H]([C@@H](CO)O)O)O)O	199	http://www.selleckchem.com/products/meglumine.html
372	1572	L2000-20	f4	4	6	20170425	1	168	173		I8:13	A1:16, B:O7, B:O14, N1:6, O1:6	[1:20, 34:20:294, 27:20:287, 261:266, 281:286]	Diclazuril	S2028	other	Others	Others	407.64	101831-37-2	free base	Diclazuril is an anti-coccidial drug.	C1=C(C=CC(=C1)C(C2=C(Cl)C=C(C=C2Cl)N3N=CC(NC3=O)=O)C#N)Cl	39	http://www.selleckchem.com/products/diclazuril.html
373	1573	L2000-20	f5	5	6	20170425	1	148	153		H8:13	A1:16, B:O7, B:O14, N1:6, O1:6	[1:20, 34:20:294, 27:20:287, 261:266, 281:286]	Tiopronin	S2062	other	Others	Others	163.19	2/2/1953	free base	Tiopronin is a US Food and Drug Administration (FDA)-approved drug for the treatment of cystinuria by controlling the rate of cystine precipitation and excretion.	C(CNC(C(C)S)=O)(=O)O	196	http://www.selleckchem.com/products/tiopronin-thiola.html
374	1574	L2000-20	f6	6	6	20170425	1	128	133		G8:13	A1:16, B:O7, B:O14, N1:6, O1:6	[1:20, 34:20:294, 27:20:287, 261:266, 281:286]	Probucol	S2119	other	Others	Others	516.84	23288-49-5	free base	Probucol is an anti-hyperlipidemic drug by lowering the level of cholesterol in the bloodstream by increasing the rate of LDL catabolism.	C1(=C(C(=CC(=C1)SC(SC2C=C(C(=C(C=2)C(C)(C)C)O)C(C)(C)C)(C)C)C(C)(C)C)O)C(C)(C)C	199	http://www.selleckchem.com/products/probucol.html
375	1575	L2000-20	f7	7	6	20170425	1	108	113		F8:13	A1:16, B:O7, B:O14, N1:6, O1:6	[1:20, 34:20:294, 27:20:287, 261:266, 281:286]	4-Methylumbelliferone (4-MU)	S2256	other	Others	Others	176.17	90-33-5	free base	4-Methylumbelliferone is a hyaluronic acid (HA) synthesis inhibitor with an IC50 of 0.4 mM.	C1=C(C=CC2=C1OC(C=C2C)=O)O	198	http://www.selleckchem.com/products/4-Methylumbelliferone(4-MU).html
376	1576	L2000-20	f8	8	6	20170425	1	88	93		E8:13	A1:16, B:O7, B:O14, N1:6, O1:6	[1:20, 34:20:294, 27:20:287, 261:266, 281:286]	Baicalin	S2269	other	Others	Others	446.36	21967-41-9	free base	Baicalin is a known prolyl endopeptidase inhibitor and affects the GABA receptors.	[C@@H]1([C@@H]([C@H]([C@H](O[C@H]1C(=O)O)OC2=C(O)C(=C3C(=C2)OC(=CC3=O)C4=CC=CC=C4)O)O)O)O	199	http://www.selleckchem.com/products/Baicalin.html
377	1577	L2000-20	f9	9	6	20170425	1	68	73		D8:13	A1:16, B:O7, B:O14, N1:6, O1:6	[1:20, 34:20:294, 27:20:287, 261:266, 281:286]	Cytisine	S2287	other	Others	Others	190.24	485-35-8	free base	Cytisine is a nicotinic acetylcholine receptor agonist.	C12N(C(C=CC=1)=O)C[C@@H]3CNC[C@H]2C3	199	http://www.selleckchem.com/products/Cytisine(Baphitoxine,-Sophorine).html
378	1578	L2000-20	f10	10	6	20170425	1	48	53		C8:13	A1:16, B:O7, B:O14, N1:6, O1:6	[1:20, 34:20:294, 27:20:287, 261:266, 281:286]	Formononetin	S2299	other	Others	Others	268.26	485-72-3	free base	Formononetin is a phytoestrogen from the root of Astragalus membranaceus and an O-methylated isoflavone.	C12=C(C=C(C=C1)O)OC=C(C2=O)C3=CC=C(C=C3)OC	201	http://www.selleckchem.com/products/Formononetin(Formononetol).html
379	1579	L2000-20	f11	11	6	20170425	1	28	33		B8:13	A1:16, B:O7, B:O14, N1:6, O1:6	[1:20, 34:20:294, 27:20:287, 261:266, 281:286]	Kaempferol	S2314	other	Others	Others	286.23	520-18-3	free base	Kaempferol is a natural flavonol, a type of flavonoid, that has been isolated from plant sources.	C1(=CC(=C2C(=C1)OC(=C(C2=O)O)C3=CC=C(C=C3)O)O)O	199	http://www.selleckchem.com/products/Kaempferol.html
380	1580	L2000-20	g2	2	7	20170425	1	201	206		K1:6	A1:16, B:O7, B:O14, N1:6, O1:6	[1:20, 34:20:294, 27:20:287, 261:266, 281:286]	(-)-Tetramisole	S1939	other	Others	Others	240.75	16595-80-5	hydrochloride	(-)-Tetramisole is an antihelminthic drug that has been tried experimentally in rheumatic disorders where it apparently restores the immune response by increasing macrophage chemotaxis and T-lymphocyte function.	[C@]1(CN2C(=N1)SCC2)(C3=CC=CC=C3)[H].Cl	10	http://www.selleckchem.com/products/Levamisole-Hydrochloride(Ergamisol).html
381	1581	L2000-20	g3	3	7	20170425	1	181	186		J1:6	A1:16, B:O7, B:O14, N1:6, O1:6	[1:20, 34:20:294, 27:20:287, 261:266, 281:286]	Mometasone furoate	S1987	other	Others	Others	521.43	83919-23-7	furoate	Mometasone furoate is a glucocorticosteroid used topically to reduce inflammation of the skin or in the airways.	C1C(C=C2[C@](C=1)([C@]3([C@@](CC2)([C@]4([C@](C[C@H]3O)([C@@]([C@@H](C4)C)(C(CCl)=O)OC(=O)C5=CC=CO5)C)[H])[H])Cl)C)=O	11	http://www.selleckchem.com/products/mometasone-furoate.html
382	1582	L2000-20	g4	4	7	20170425	1	161	166		I1:6	A1:16, B:O7, B:O14, N1:6, O1:6	[1:20, 34:20:294, 27:20:287, 261:266, 281:286]	Rebamipide	S2032	other	Others	Others	370.79	90098-04-7	free base	Rebamipide is a cholecystokinin type 1 (CCK1) receptor inhibitor for inhibiting [125I]BH-CCK-8S with IC50 of 37.7 μM.	C1(C(NC(CC2=CC(NC3=C2C=CC=C3)=O)C(=O)O)=O)=CC=C(C=C1)Cl	199	http://www.selleckchem.com/products/rebamipide.html
383	1583	L2000-20	g5	5	7	20170425	1	141	146		H1:6	A1:16, B:O7, B:O14, N1:6, O1:6	[1:20, 34:20:294, 27:20:287, 261:266, 281:286]	Moxonidine	S2066	other	Others	Others	241.68	75438-57-2	free base	Moxonidine is a selective agonist at the imidazoline receptor subtype 1, used as antihypertensive agent.	N1=C(N=C(C(=C1Cl)NC2=NCCN2)OC)C	99	http://www.selleckchem.com/products/moxonidine.html
384	1584	L2000-20	g6	6	7	20170425	1	121	126		G1:6	A1:16, B:O7, B:O14, N1:6, O1:6	[1:20, 34:20:294, 27:20:287, 261:266, 281:286]	Dextrose	S2123	other	Others	Others	180.16	50-99-7	free base	Dextrose, a simple sugar (monosaccharide), is an important carbohydrate in biology.	OC[C@H]([C@H]([C@@H]([C@H](C=O)O)O)O)O	199	http://www.selleckchem.com/products/Dextrose(D-glucose).html
385	1585	L2000-20	g7	7	7	20170425	1	101	106		F1:6	A1:16, B:O7, B:O14, N1:6, O1:6	[1:20, 34:20:294, 27:20:287, 261:266, 281:286]	Esculin	S2258	other	Others	Others	340.28	531-75-9	free base	Esculin is a glucoside found in horse chestnuts.	C1(=C(C=C2C(=C1)OC(C=C2)=O)O[C@@H]3O[C@@H]([C@H]([C@@H]([C@@H]3O)O)O)CO)O	199	http://www.selleckchem.com/products/Aesculin(Esculin).html
386	1586	L2000-20	g8	8	7	20170425	1	81	86		E1:6	A1:16, B:O7, B:O14, N1:6, O1:6	[1:20, 34:20:294, 27:20:287, 261:266, 281:286]	Bergenin	S2270	other	Others	Others	328.27	477-90-7	free base	Bergenin is trihydroxybenzoic acid glycoside and the C-glycoside of 4-O-methyl gallic acid.	[C@H]1([C@H]([C@@H]([C@@]2([C@@](O1)(C3=C(C(O2)=O)C=C(C(=C3O)OC)O)[H])[H])O)O)CO	201	http://www.selleckchem.com/products/Bergenin-(Cuscutin).html
387	1587	L2000-20	g9	9	7	20170425	1	61	66		D1:6	A1:16, B:O7, B:O14, N1:6, O1:6	[1:20, 34:20:294, 27:20:287, 261:266, 281:286]	Dihydroartemisinin (DHA)	S2290	other	Others	Others	284.35	71939-50-9	free base	Dihydroartemisinin (DHA) is a semi-synthetic derivative of artemisinin and isolated from the traditional Chinese herb Artemisia annua.	C1C[C@@]2([C@]34[C@]([C@H]1C)(CC[C@@](O[C@](O[C@H]([C@@H]2C)O)3[H])(C)OO4)[H])[H]	200	http://www.selleckchem.com/products/Dihydroartemisinin(DHA).html
388	1588	L2000-20	g10	10	7	20170425	1	41	46		C1:6	A1:16, B:O7, B:O14, N1:6, O1:6	[1:20, 34:20:294, 27:20:287, 261:266, 281:286]	Ferulic Acid	S2300	other	Others	Others	194.19	1135-24-6	free base	Ferulic Acid is a hydroxycinnamic acid and a type of organic compound found in the Ferula assafoetida L. or Ligusticum chuanxiong.	C1=C(C(=CC(=C1)/C=C/C(O)=O)OC)O	10	http://www.selleckchem.com/products/Fumalic-acid(Ferulic-acid).html
389	1589	L2000-20	g11	11	7	20170425	1	21	26		B1:6	A1:16, B:O7, B:O14, N1:6, O1:6	[1:20, 34:20:294, 27:20:287, 261:266, 281:286]	Kinetin	S2316	other	Others	Others	215.21	525-79-1	free base	Kinetin is a type of cytokinin, a class of plant hormone that promotes cell division.	C12=C(C(=NC=N1)NCC3OC=CC=3)NC=N2	199	http://www.selleckchem.com/products/Kinetin(6-Furfuryladenine).html
390	1590	L2000-20	h2	2	8	20170425	1	295	300		O15:20	A1:16, B:O7, B:O14, N1:6, O1:6	[1:20, 34:20:294, 27:20:287, 261:266, 281:286]	Menadione	S1949	other	Others	Others	172.18	58-27-5	free base	Menadione, a synthetic naphthoquinone without the isoprenoid side chain and biological activity, but can be converted to active vitamin K2, menaquinone, after alkylation in vivo.	C1=CC=C2C(=C1)C(C(=CC2=O)C)=O	197	http://www.selleckchem.com/products/Menadione.html
391	1591	L2000-20	h3	3	8	20170425	1	275	280		M15:20	A1:16, B:O7, B:O14, N1:6, O1:6	[1:20, 34:20:294, 27:20:287, 261:266, 281:286]	Propylthiouracil	S1988	other	Others	Others	170.23	51-52-5	free base	Propylthiouracil is a thyroperoxidase and 5'-deiodinase inhibitor.	C1=C(NC(NC1=O)=S)CCC	199	http://www.selleckchem.com/products/Propylthiouracil.html
392	1592	L2000-20	h4	4	8	20170425	1	255	260		N15:20	A1:16, B:O7, B:O14, N1:6, O1:6	[1:20, 34:20:294, 27:20:287, 261:266, 281:286]	Epalrestat	S2035	other	Others	Others	319.4	82159-09-9	free base	Epalrestat is an aldose reductase inhibitor with IC50 of 72 nM.	C1=CC=CC(=C1)/C=C(/C=C2\SC(N(C2=O)CC(O)=O)=S)C	10	http://www.selleckchem.com/products/epalrestat.html
393	1593	L2000-20	h5	5	8	20170425	1	235	240		L15:20	A1:16, B:O7, B:O14, N1:6, O1:6	[1:20, 34:20:294, 27:20:287, 261:266, 281:286]	Ozagrel HCl	S2067	other	Others	Others	264.71	78712-43-3	hydrochloride	Ozagrel HCl is a selective thromboxane A2 synthetase enzyme inhibitors with IC50 of 11 nM, used as antiasthmatic agent.	C1(=C(C=CC(=C1)/C=C/C(O)=O)CN2C=NC=C2).Cl	200	http://www.selleckchem.com/products/ozagrel-hydrochloride.html
394	1594	L2000-20	h6	6	8	20170425	1	288	293		O8:13	A1:16, B:O7, B:O14, N1:6, O1:6	[1:20, 34:20:294, 27:20:287, 261:266, 281:286]	Xylose	S2124	other	Others	Others	150.13	25990-60-7	free base	Xylose is a sugar first isolated from wood.	OC[C@H]([C@@H]([C@H](C=O)O)O)O	199	http://www.selleckchem.com/products/Xylose.html
395	1595	L2000-20	h7	7	8	20170425	1	268	273		N8:13	A1:16, B:O7, B:O14, N1:6, O1:6	[1:20, 34:20:294, 27:20:287, 261:266, 281:286]	Aloe-emodin	S2259	other	Others	Others	270.24	481-72-1	free base	Aloe-emodin is an interferon-inducing agent with IC50 of about 1 μg/mL for JEV and of about 0.33 μg/mL for EV71.	C12=C(C=C(C=C1O)CO)C(C3=C(C2=O)C(=CC=C3)O)=O	10	http://www.selleckchem.com/products/Aloe-emodin.html
396	1596	L2000-20	h8	8	8	20170425	1	248	253		M8:13	A1:16, B:O7, B:O14, N1:6, O1:6	[1:20, 34:20:294, 27:20:287, 261:266, 281:286]	Berberine HCl	S2271	other	Others	Others	371.82	633-65-8	hydrochloride	Berberine Hydrochloride is a quaternary ammonium salt from the group of isoquinoline alkaloids.	C1(=C(C(=C2C(=C1)C=C3[N+](=C2)CCC4=C3C=C5C(=C4)OCO5)OC)OC).[Cl-]	199	http://www.selleckchem.com/products/Berberine-Hydrochloride.html
397	1597	L2000-20	h9	9	8	20170425	1	228	233		L8:13	A1:16, B:O7, B:O14, N1:6, O1:6	[1:20, 34:20:294, 27:20:287, 261:266, 281:286]	Diosmin	S2292	other	Others	Others	608.55	520-27-4	free base	Diosmin is a semisynthetic phlebotropic agent and a member of the flavonoid family.	[C@@H]1([C@H]([C@@H](O[C@H]([C@H]1O)C)OC[C@@H]2[C@H]([C@@H]([C@H]([C@@H](O2)OC3=CC4=C(C(=C3)O)C(C=C(O4)C5=CC(=C(C=C5)OC)O)=O)O)O)O)O)O	10	http://www.selleckchem.com/products/Diosmin.html
398	1598	L2000-20	h10	10	8	20170425	1	241	246		M1:6	A1:16, B:O7, B:O14, N1:6, O1:6	[1:20, 34:20:294, 27:20:287, 261:266, 281:286]	Glycyrrhizic Acid	S2302	other	Others	Others	822.93	1405-86-3	free base	Glycyrrhizic acid is a widely used anti-inflammatory agent isolated from the licorice root.	C1[C@@H](C([C@]2([C@](C1)([C@]3([C@@](CC2)([C@]4(C(=CC3=O)[C@@]5([C@@](CC4)(CC[C@@](C5)(C(O)=O)C)C)[H])C)C)[H])C)[H])(C)C)O[C@H]6O[C@@H]([C@H]([C@@H]([C@@H]6O[C@@H]7O[C@@H]([C@H]([C@@H]([C@@H]7O)O)O)C(O)=O)O)O)C(O)=O	142	http://www.selleckchem.com/products/Glycyrrhizic-acid.html
399	1599	L2000-20	h11	11	8	20170425	1	221	226		L1:6	A1:16, B:O7, B:O14, N1:6, O1:6	[1:20, 34:20:294, 27:20:287, 261:266, 281:286]	L-(+)-Rhamnose Monohydrate	S2317	other	Others	Others	182.17	10030-85-0	monohydrate	L(+)-Rhamnose (Rham) is a naturally-occurring deoxy sugar that is found primarily in plants and some bacteria.	[C@H]1([C@H]([C@H](C(O[C@@H]1C)O)O)O)O.O	10	http://www.selleckchem.com/products/L(+)-Rhamnose-Monohydrate.html
400	1600	L2000-21	a2	2	1	20170426	0	215	220		K15:20	A1:16, B:O7, B:O14, N1:6, O1:6	[1:20, 34:20:294, 27:20:287, 261:266, 281:286]	Limonin	S2319	other	Others	Others	470.51	1180-71-8	free base	Limonin is a triterpenoid enriched in citrus fruits, which has antivirus and antitumor ability.	C1(O[C@H]([C@]2([C@]3([C@H]1O3)[C@@]4([C@](CC2)([C@]56[C@@](CC4=O)(C(O[C@]5(CC(OC6)=O)[H])(C)C)[H])[H])C)C)C7=COC=C7)=O	93	http://www.selleckchem.com/products/Limonin.html
401	1601	L2000-21	a3	3	1	20170426	0	195	200		J15:20	A1:16, B:O7, B:O14, N1:6, O1:6	[1:20, 34:20:294, 27:20:287, 261:266, 281:286]	Nobiletin	S2333	other	Others	Others	402.39	478-01-3	free base	Nobiletin, a citrus flavonoid isolated from citrus peels like in tangerine, which has anti-inflammatory and anti-tumor activities.	C1(=C(C(=C2C(=C1OC)OC(=CC2=O)C3=CC(=C(C=C3)OC)OC)OC)OC)OC	201	http://www.selleckchem.com/products/Nobiletin(Hexamethoxyflavone).html
402	1602	L2000-21	a4	4	1	20170426	0	175	180		I15:20	A1:16, B:O7, B:O14, N1:6, O1:6	[1:20, 34:20:294, 27:20:287, 261:266, 281:286]	Piperine	S2344	other	Others	Others	285.34	94-62-2	free base	Piperine (1-Piperoylpiperidine) is the alkaloid responsible for the pungency of black pepper and long pepper, which has also been used in some forms of traditional medicine and as an insecticide.	C1CN(CCC1)C(/C=C/C=C/C2=CC3=C(C=C2)OCO3)=O	199	http://www.selleckchem.com/products/Piperine(1-Piperoylpiperidine).html
403	1603	L2000-21	a5	5	1	20170426	0	155	160		H15:20	A1:16, B:O7, B:O14, N1:6, O1:6	[1:20, 34:20:294, 27:20:287, 261:266, 281:286]	Shikimic Acid	S2356	other	Others	Others	174.15	138-59-0	free base	Shikimic acid(Shikimate), more commonly known as its anionic form shikimate, is an important biochemical intermediate in plants and microorganisms.	C1C(C([C@@H](CC=1C(=O)O)O)O)O	10	http://www.selleckchem.com/products/Shikimic-acid(Shikimate).html
404	1604	L2000-21	a6	6	1	20170426	0	135	140		G15:20	A1:16, B:O7, B:O14, N1:6, O1:6	[1:20, 34:20:294, 27:20:287, 261:266, 281:286]	Taxifolin (Dihydroquercetin)	S2366	other	Others	Others	304.25	480-18-2	free base	Taxifolin is a flavonoid in many plants such as Taxus chinensis, Siberian larch, Cedrus deodara and so on.	C1(=CC(=C2C(=C1)O[C@@H]([C@H](C2=O)O)C3=CC(=C(C=C3)O)O)O)O	10	http://www.selleckchem.com/products/Taxifolin(Dihydroquercetin).html
405	1605	L2000-21	a7	7	1	20170426	0	115	120		F15:20	A1:16, B:O7, B:O14, N1:6, O1:6	[1:20, 34:20:294, 27:20:287, 261:266, 281:286]	5-hydroxytryptophan (5-HTP)	S2374	other	Others	Others	220.22	56-69-9	free base	5-Hydroxytryptophan (5-HTP), also known as oxitriptan (INN), is a naturally occurring amino acid and chemical precursor for the treatment of depression.	C1(=CC=C2C(=C1)C(=CN2)CC(C(O)=O)N)O	199	http://www.selleckchem.com/products/5-hydroxytryptophan(5-HTP).html
406	1606	L2000-21	a8	8	1	20170426	0	95	100		E15:20	A1:16, B:O7, B:O14, N1:6, O1:6	[1:20, 34:20:294, 27:20:287, 261:266, 281:286]	Evodiamine	S2382	other	Others	Others	303.36	518-17-2	free base	Evodiamine (Isoevodiamine), an alkaloid extract from the fruit of Evodiae Fructus exhibits antitumor activities against the human tumor cells.	C1=CC=C2C(=C1)C3=C(N2)C4N(CC3)C(C5=C(N4C)C=CC=C5)=O	10	http://www.selleckchem.com/products/Evodiamine(Isoevodiamine).html
407	1607	L2000-21	a9	9	1	20170426	0	75	80		D15:20	A1:16, B:O7, B:O14, N1:6, O1:6	[1:20, 34:20:294, 27:20:287, 261:266, 281:286]	Sesamin	S2392	other	Others	Others	354.35	607-80-7	free base	Sesamin, a lignan isolated from the bark of Fagara plants and from sesame oil, exhibits various health benefits.	C12=C(C=CC(=C1)[C@H]3OC[C@]4([C@]3(CO[C@@H]4C5=CC6=C(C=C5)OCO6)[H])[H])OCO2	200	http://www.selleckchem.com/products/Sesamin(Fagarol).html
408	1608	L2000-21	a10	10	1	20170426	0	55	60		C15:20	A1:16, B:O7, B:O14, N1:6, O1:6	[1:20, 34:20:294, 27:20:287, 261:266, 281:286]	Sophocarpine	S2405	other	Others	Others	246.35	6483-15-4	free base	Sophocarpine, a major ingredient of Sophora alopecuroides, has a wide range of pharmacological effects.	C1=CC(N2[C@](C1)([C@]3([C@@]4([C@](C2)(CCCN4CCC3)[H])[H])[H])[H])=O	198	http://www.selleckchem.com/products/Sophocarpine.html
409	1609	L2000-21	a11	11	1	20170426	0	35	40		B15:20	A1:16, B:O7, B:O14, N1:6, O1:6	[1:20, 34:20:294, 27:20:287, 261:266, 281:286]	20-Hydroxyecdysone	S2417	other	Others	Others	480.63	5289-74-7	free base	20-Hydroxyecdysone (Ecdysterone, 20E) is a naturally occurring ecdysteroid hormone which controls the ecdysis (moulting) and metamorphosis of arthropods.	[C@H]1([C@@H](C[C@@]2([C@](C1)([C@]3(C(=CC2=O)[C@]4([C@](CC3)([C@@H](CC4)[C@@]([C@@H](CCC(C)(O)C)O)(C)O)C)O)[H])C)[H])O)O	199	http://www.selleckchem.com/products/20-hydroxyecdysone.html
410	1610	L2000-21	b2	2	2	20170426	0	208	213		K8:13	A1:16, B:O7, B:O14, N1:6, O1:6	[1:20, 34:20:294, 27:20:287, 261:266, 281:286]	Magnolol	S2321	other	Others	Others	266.33	528-43-8	free base	Magnolol is a bioactive lignin found in the bark of the Houpu magnolia (Magnolia officinalis) which shows antifungal properties.	C1=CC(=C(C=C1CC=C)C2=CC(=CC=C2O)CC=C)O	199	http://www.selleckchem.com/products/Magnolol(2,2-Bichavicol).html
411	1611	L2000-21	b3	3	2	20170426	0	188	193		J8:13	A1:16, B:O7, B:O14, N1:6, O1:6	[1:20, 34:20:294, 27:20:287, 261:266, 281:286]	Oleanolic Acid	S2334	other	Others	Others	456.7	508-02-1	free base	Oleanolic Acid is a non-toxic, hepatoprotective triterpenoid found in Phytolacca Americana, which exerts antitumor and antiviral properties.	C1[C@@H](C([C@]2([C@](C1)([C@]3([C@@](CC2)([C@]4(C(=CC3)[C@@]5(C(CC4)[C@@H](CC(C5)(C)C)C(=O)O)[H])C)C)[H])C)[H])(C)C)O	45	http://www.selleckchem.com/products/Oleanolic-Acid(Caryophyllin).html
412	1612	L2000-21	b4	4	2	20170426	0	168	173		I8:13	A1:16, B:O7, B:O14, N1:6, O1:6	[1:20, 34:20:294, 27:20:287, 261:266, 281:286]	Puerarin	S2346	other	Others	Others	416.38	3681-99-0	free base	Puerarin (Kakonein), an isoflavones found in the root of Radix puerariae, is a 5-HT2C receptor and benzodiazepine site antagonist.	C12=C(C(=C(C=C1)O)O[C@H]3[C@@H]([C@H]([C@@H]([C@H](O3)CO)O)O)O)OC=C(C2=O)C4=CC=C(C=C4)O	10	http://www.selleckchem.com/products/Puerarin(Kakonein).html
413	1613	L2000-21	b5	5	2	20170426	0	148	153		H8:13	A1:16, B:O7, B:O14, N1:6, O1:6	[1:20, 34:20:294, 27:20:287, 261:266, 281:286]	Silibinin	S2357	other	Others	Others	482.44	22888-70-6	free base	Silibinin, the main flavonoid extracted from the milk thistle Silybum marianum, displays hepatoprotective properties in acute and chronic liver injury.	[C@H]1([C@H](OC2C(O1)=CC=C(C=2)[C@H]3[C@@H](O)C(C4C(O3)=CC(=CC=4O)O)=O)C5=CC=C(C(=C5)OC)O)CO	10	http://www.selleckchem.com/products/Silibinin(Silybin).html
414	1614	L2000-21	b6	6	2	20170426	0	128	133		G8:13	A1:16, B:O7, B:O14, N1:6, O1:6	[1:20, 34:20:294, 27:20:287, 261:266, 281:286]	Tetrahydropapaverine HCl	S2367	other	Others	Others	379.88	1654280	hydrochloride	Tetrahydropapaverine, one of the TIQs and an analogue of salsolinol and tetrahydropapaveroline, has been reported to have neurotoxic effects on dopamine neurons.	C1(=C(C=C2C(=C1)CCNC2CC3=CC=C(C(=C3)OC)OC)OC)OC.Cl	18	http://www.selleckchem.com/products/Tetrahydropapaverine-hydrochloride.html
415	1615	L2000-21	b7	7	2	20170426	0	108	113		F8:13	A1:16, B:O7, B:O14, N1:6, O1:6	[1:20, 34:20:294, 27:20:287, 261:266, 281:286]	Aloin	S2375	other	Others	Others	418.39	1415-73-2	free base	Aloin, a natural anthracycline from Aloe vera, is a tyrosinase inhibitor.	[C@@H]1(O[C@]([C@@H]([C@H]([C@H]1O)O)O)([C@]2(C3=C(C(C4=C2C=C(C=C4O)CO)=O)C(=CC=C3)O)[H])[H])CO	200	http://www.selleckchem.com/products/Aloin(Barbaloin).html
416	1616	L2000-21	b8	8	2	20170426	0	88	93		E8:13	A1:16, B:O7, B:O14, N1:6, O1:6	[1:20, 34:20:294, 27:20:287, 261:266, 281:286]	Gastrodin	S2383	other	Others	Others	286.28	62499-27-8	free base	Gastrodin, an anti-inflammatory polyphenol extracted from Chinese natural herbal Gastrodia elata Blume., benefits neurodegenerative diseases.	[C@@H]1([C@@H]([C@H]([C@@H](O[C@H]1CO)OC2=CC=C(C=C2)CO)O)O)O	174	http://www.selleckchem.com/products/Gastrodin(Gastrodine).html
417	1617	L2000-21	b9	9	2	20170426	0	68	73		D8:13	A1:16, B:O7, B:O14, N1:6, O1:6	[1:20, 34:20:294, 27:20:287, 261:266, 281:286]	Sorbitol	S2393	other	Others	Others	182.17	50-70-4	free base	Sorbitol is a sugar alcohol and a sugar substitute.	OC[C@H]([C@H]([C@@H]([C@H](CO)O)O)O)O	197	http://www.selleckchem.com/products/Sorbitol(Glucitol).html
418	1618	L2000-21	b10	10	2	20170426	0	48	53		C8:13	A1:16, B:O7, B:O14, N1:6, O1:6	[1:20, 34:20:294, 27:20:287, 261:266, 281:286]	Curcumol	S2407	other	Others	Others	236.35	4871-97-0	free base	Curcumol is a pure monomer isolated from Rhizoma Curcumaeis with antitumor activities.	C1([C@]2([C@]3(C[C@H]([C@](C1)(O)O3)C(C)C)[C@@H](CC2)C)[H])=C	198	http://www.selleckchem.com/products/Curcumol.html
419	1619	L2000-21	b11	11	2	20170426	0	28	33		B8:13	A1:16, B:O7, B:O14, N1:6, O1:6	[1:20, 34:20:294, 27:20:287, 261:266, 281:286]	Ipriflavone (Osteofix)	S2422	other	Others	Others	280.32	35212-22-7	free base	Ipriflavone (7-Isopropoxyisoflavon) is used to inhibit bone resorption.	C1=C(C=C2C(=C1)C(C(=CO2)C3=CC=CC=C3)=O)OC(C)C	10	http://www.selleckchem.com/products/ipriflavone.html
420	1620	L2000-21	c2	2	3	20170426	0	201	206		K1:6	A1:16, B:O7, B:O14, N1:6, O1:6	[1:20, 34:20:294, 27:20:287, 261:266, 281:286]	Methyl-Hesperidin	S2323	other	Others	Others	642.6	11013-97-1	free base	Methyl Hesperidin is a flavanone glycoside (flavonoid) (C28H34O15) found abundantly in citrus fruits. Its aglycone form is called hesperetin.	[C@H]1([C@H]([C@H]([C@@H](O[C@@H]1C)OC[C@@H]2[C@H]([C@@H]([C@H]([C@@H](O2)OC3=CC(=C4C(=C3)O[C@@H](CC4=O)C5=CC=C(C(=C5)O)OC)O)O)O)O)O)O)O.CO	10	http://www.selleckchem.com/products/Methyl-Hesperidin.html
421	1621	L2000-21	c3	3	3	20170426	0	181	186		J1:6	A1:16, B:O7, B:O14, N1:6, O1:6	[1:20, 34:20:294, 27:20:287, 261:266, 281:286]	Oridonin	S2335	other	Others	Others	364.43	28957-04-2	free base	Oridonin, a diterpenoid purified from Rabdosia rubescens, is an antitumor agent.	[C@]12(C(CC[C@@H]([C@@]31C4[C@]5(C(C([C@@]([C@H]5O)(CC4)[H])=C)=O)[C@]([C@@H]2O)(O)OC3)O)(C)C)[H]	200	http://www.selleckchem.com/products/Oridonin(Isodonol).html
422	1622	L2000-21	c4	4	3	20170426	0	161	166		I1:6	A1:16, B:O7, B:O14, N1:6, O1:6	[1:20, 34:20:294, 27:20:287, 261:266, 281:286]	Quercetin Dihydrate	S2347	other	Others	Others	338.27	6151-25-3	dihydrate	Quercetin, a polyphenolic flavonoid found in a wide variety of plant-based foods, such as apples, onions, berries, and red wine, is utilized in many different cultures for their nervous system and anticancer effects.	C1(=CC(=C2C(=C1)OC(=C(C2=O)O)C3=CC=C(C(=C3)O)O)O)O.O.O	201	http://www.selleckchem.com/products/Quercetin-dihydrate(Sophoretin).html
423	1623	L2000-21	c5	5	3	20170426	0	141	146		H1:6	A1:16, B:O7, B:O14, N1:6, O1:6	[1:20, 34:20:294, 27:20:287, 261:266, 281:286]	Silymarin	S2358	other	Others	Others	482.44	65666-07-1	free base	Silymarin (Silybin B), a polyphenolic flavonoid extracted from the seeds of Silybum marianum or milk thistle, is used in the prevention and treatment of liver diseases and primary liver cancer.	C1(=CC(=CC=C1O)C2OC3C(OC2CO)=CC(=CC=3)C4C(O)C(C5=C(O4)C=C(C=C5O)O)=O)OC	201	http://www.selleckchem.com/products/Silymarin(Silybin-B).html
424	1624	L2000-21	c6	6	3	20170426	0	121	126		G1:6	A1:16, B:O7, B:O14, N1:6, O1:6	[1:20, 34:20:294, 27:20:287, 261:266, 281:286]	Theobromine	S2368	other	Others	Others	180.16	83-67-0	free base	Theobromine is a xanthine alkaloid widely consumed as stimulants and snacks in coffee and cocoa based foods and most often as part of ingredients in drugs.	N1C(N(C2=C(C1=O)N(C=N2)C)C)=O	10	http://www.selleckchem.com/products/Theobromine(3,7-Dimethylxanthine).html
425	1625	L2000-21	c7	7	3	20170426	0	101	106		F1:6	A1:16, B:O7, B:O14, N1:6, O1:6	[1:20, 34:20:294, 27:20:287, 261:266, 281:286]	Ammonium Glycyrrhizinate	S2376	other	Others	Others	839.96	1407-03-0	glycyrrhizinate	Ammonium Glycyrrhizinate is a unique product derived from Licorice root and has an extremely sweet taste.	[C@@]1(CC[C@]2([C@@](C1)(C3[C@@](CC2)([C@]4([C@](C(C=3)=O)([C@]5([C@@](CC4)(C([C@H](CC5)O[C@]6(O[C@@H]([C@H]([C@@H]([C@@H]6O[C@]7([C@@H]([C@H]([C@@H]([C@H](O7)C(=O)O)O)O)O)[H])O)O)C(O)=O)[H])(C)C)[H])C)[H])C)C)[H])C)(C)C(O)=O.N	200	http://www.selleckchem.com/products/Ammonium-Glycyrrhizinate(AMGZ).html
426	1626	L2000-21	c8	8	3	20170426	0	81	86		E1:6	A1:16, B:O7, B:O14, N1:6, O1:6	[1:20, 34:20:294, 27:20:287, 261:266, 281:286]	Hematoxylin	S2384	other	Others	Others	302.28	517-28-2	free base	Hematoxylin (Hydroxybrazilin) is a compound that forms strongly colored complexes with certain metal ions, notably Fe(III) and Al(III) salts and a kind of stain in histology.	[C@]12([C@@](C3=C(OC1)C(=C(C=C3)O)O)(C4=C(C2)C=C(C(=C4)O)O)[H])O	201	http://www.selleckchem.com/products/Hematoxylin(Hydroxybrazilin).html
427	1627	L2000-21	c9	9	3	20170426	0	61	66		D1:6	A1:16, B:O7, B:O14, N1:6, O1:6	[1:20, 34:20:294, 27:20:287, 261:266, 281:286]	Rheochrysidin	S2395	other	Others	Others	284.26	521-61-9	free base	Physcion is a anthraquinone from roots of Rheum officinale Baill.	C1(=CC(=C2C(=C1)C(C3=C(C2=O)C(=CC(=C3)OC)O)=O)O)C	21	http://www.selleckchem.com/products/Rheochrysidin-Physcione.html
428	1628	L2000-21	c10	10	3	20170426	0	41	46		C1:6	A1:16, B:O7, B:O14, N1:6, O1:6	[1:20, 34:20:294, 27:20:287, 261:266, 281:286]	Cephalomannine	S2408	other	Others	Others	831.9	71610-00-9	free base	Cephalomannine is an active anti-cancer agent obtained from Taxus yunnanensis and has an antineoplastic effect on tumors found in mice.	C1=CC=CC(=C1)[C@@H]([C@H](C(O[C@H]2C[C@@]3(C(C(=C2C)[C@@H](C([C@]4([C@@]([C@]5([C@@H](C[C@H]4O)OC5)OC(=O)C)([C@@H]3OC(C6=CC=CC=C6)=O)[H])C)=O)OC(=O)C)(C)C)O)=O)O)NC(/C(=C/C)C)=O	132	http://www.selleckchem.com/products/cephalomannine.html
429	1629	L2000-21	c11	11	3	20170426	0	21	26		B1:6	A1:16, B:O7, B:O14, N1:6, O1:6	[1:20, 34:20:294, 27:20:287, 261:266, 281:286]	Guanosine	S2439	other	Others	Others	283.24	118-00-3	free base	Guanosine is a purine nucleoside comprising guanine attached to a ribose (ribofuranose) ring via a &beta;-N9-glycosidic bond.	C12N([C@@H]3O[C@@H](CO)[C@H]([C@H]3O)O)C=NC=1C(NC(=N2)N)=O	10	http://www.selleckchem.com/products/guanosine.html
430	1630	L2000-21	d2	2	4	20170426	0	295	300		O15:20	A1:16, B:O7, B:O14, N1:6, O1:6	[1:20, 34:20:294, 27:20:287, 261:266, 281:286]	Morin Hydrate	S2325	other	Others	Others	320.25	6202-27-3	hydrate	Morin hydrate(Aurantica) is a flavonoid isolated from Maclura pomifera (Osage orange), Maclura tinctoria (old fustic) and from leaves of Psidium guajava (common guava).	C1(=CC(=C2C(=C1)OC(=C(C2=O)O)C3=CC=C(C=C3O)O)O)O.O	199	http://www.selleckchem.com/products/Morin-hydrate(Aurantica).html
431	1631	L2000-21	d3	3	4	20170426	0	275	280		M15:20	A1:16, B:O7, B:O14, N1:6, O1:6	[1:20, 34:20:294, 27:20:287, 261:266, 281:286]	Orotic acid (6-Carboxyuracil)	S2336	other	Others	Others	156.1	65-86-1	free base	Orotic acid(6-Carboxyuracil) is a heterocyclic compound and an acid.	C1=C(NC(NC1=O)=O)C(O)=O	10	http://www.selleckchem.com/products/Orotic-acid(6-Carboxyuracil).html
432	1632	L2000-21	d4	4	4	20170426	0	255	260		N15:20	A1:16, B:O7, B:O14, N1:6, O1:6	[1:20, 34:20:294, 27:20:287, 261:266, 281:286]	Rutaecarpine	S2349	other	Others	Others	287.32	84-26-4	free base	Rutaecarpine is an indolopyridoquinazolinone alkaloid isolated from Evodia rutaecarpa and related herbs.	N12C(=NC3=C(C1=O)C=CC=C3)C4=C(CC2)C5=C(N4)C=CC=C5	83	http://www.selleckchem.com/products/Rutaecarpine(Rutecarpine).html
433	1633	L2000-21	d5	5	4	20170426	0	235	240		L15:20	A1:16, B:O7, B:O14, N1:6, O1:6	[1:20, 34:20:294, 27:20:287, 261:266, 281:286]	Sinomenine	S2359	other	Others	Others	329.39	115-53-7	free base	Sinomenine, a pure alkaloid extracted from the chinese medical plant Sinomenium acutum, is used for the treatment of rheumatism and arthritis.	C1(=C(C2=C(C=C1)C[C@H]3[C@@]4([C@]2(CC(C(=C4)OC)=O)CCN3C)[H])O)OC	200	http://www.selleckchem.com/products/Sinomenine(Cucoline).html
434	1634	L2000-21	d6	6	4	20170426	0	288	293		O8:13	A1:16, B:O7, B:O14, N1:6, O1:6	[1:20, 34:20:294, 27:20:287, 261:266, 281:286]	Troxerutin	S2369	other	Others	Others	742.68	7085-55-4	free base	Troxerutin (Trihydroxyethylrutin), a natural bioflavonoid isolated from Sophora japonica., has been reported to have many benefits and medicinal properties.	C1=C(C=C2C(=C1O)C(C(=C(O2)C3=CC(=C(C=C3)OCCO)OCCO)O[C@@H]4O[C@H]([C@H]([C@@H]([C@H]4O)O)O)CO[C@H]5[C@@H]([C@@H]([C@H]([C@@H](O5)C)O)O)O)=O)OCCO	10	http://www.selleckchem.com/products/Troxerutin.html
435	1635	L2000-21	d7	7	4	20170426	0	268	273		N8:13	A1:16, B:O7, B:O14, N1:6, O1:6	[1:20, 34:20:294, 27:20:287, 261:266, 281:286]	Biochanin A	S2377	other	Others	Others	284.26	491-80-5	free base	Biochanin A, an O-methylated isoflavone from Trifolium pratense, inhibits protein tyrosine kinase (PTK) of epidermal growth factor receptor with IC50 values of 91.5 &mu;M.	C1(=CC(=C2C(=C1)OC=C(C2=O)C3=CC=C(C=C3)OC)O)O	200	http://www.selleckchem.com/products/Biochanin-A(4-Methylgenistein).html
436	1636	L2000-21	d8	8	4	20170426	0	248	253		M8:13	A1:16, B:O7, B:O14, N1:6, O1:6	[1:20, 34:20:294, 27:20:287, 261:266, 281:286]	Hordenine	S2385	other	Others	Others	165.23	539-15-1	free base	Hordenine (N,N-dimethyl-4-hydroxyphenylethylamine) is a phenylethylamine alkaloid with antibacterial and antibiotic properties.	C1=C(C=CC(=C1)CCN(C)C)O	199	http://www.selleckchem.com/products/Hordenine.html
437	1637	L2000-21	d9	9	4	20170426	0	228	233		L8:13	A1:16, B:O7, B:O14, N1:6, O1:6	[1:20, 34:20:294, 27:20:287, 261:266, 281:286]	Salidroside	S2396	other	Others	Others	300.3	10338-51-9	free base	Salidroside, a phenylpropanoid glycoside isolated from Rhodiola rosea, has been reported to have a broad spectrum of pharmacological properties.	[C@H]1([C@H]([C@@H]([C@H]([C@@H](O1)OCCC2=CC=C(C=C2)O)O)O)O)CO	10	http://www.selleckchem.com/products/Salidroside-Rhodioloside.html
438	1638	L2000-21	d10	10	4	20170426	0	241	246		M1:6	A1:16, B:O7, B:O14, N1:6, O1:6	[1:20, 34:20:294, 27:20:287, 261:266, 281:286]	10-Deacetylbaccatin-III	S2409	other	Others	Others	544.59	32981-86-5	free base	10-Deacetylbaccatin-III is an antineoplastic agent and an anti-cancer intermediate.	[C@@]12([C@@]([C@]3([C@@](C[C@H]1O)(OC3)[H])OC(C)=O)([C@@H]([C@]4(C(C(=C([C@H](C4)O)C)[C@H](C2=O)O)(C)C)O)OC(=O)C5=CC=CC=C5)[H])C	200	http://www.selleckchem.com/products/10-dab-10-deacetylbaccatin.html
439	1639	L2000-21	d11	11	4	20170426	0	221	226		L1:6	A1:16, B:O7, B:O14, N1:6, O1:6	[1:20, 34:20:294, 27:20:287, 261:266, 281:286]	Inosine	S2442	other	Others	Others	268.23	58-63-9	free base	Inosine is a nucleoside that is formed when hypoxanthine is attached to a ribose ring via a &beta;-N9-glycosidic bond.	O1[C@@H]([C@H]([C@H]([C@H]1N2C3=C(N=C2)C(NC=N3)=O)O)O)CO	10	http://www.selleckchem.com/products/inosine.html
440	1640	L2000-21	e2	2	5	20170426	1	215	220		K15:20	A1:16, B:O7, B:O14, N1:6, O1:6	[1:20, 34:20:294, 27:20:287, 261:266, 281:286]	Myricetin	S2326	other	Others	Others	318.24	529-44-2	free base	Myricetin(Cannabiscetin) is a flavonoid found in many grapes, berries, fruits, vegetables, herbs, as well as other plants, which has antioxidant and anti tumor properties.	C1(=CC(=C2C(=C1)OC(=C(C2=O)O)C3=CC(=C(C(=C3)O)O)O)O)O	201	http://www.selleckchem.com/products/Myricetin(Cannabiscetin).html
441	1641	L2000-21	e3	3	5	20170426	1	195	200		J15:20	A1:16, B:O7, B:O14, N1:6, O1:6	[1:20, 34:20:294, 27:20:287, 261:266, 281:286]	Osthole	S2337	other	Others	Others	244.29	484-12-8	free base	Osthol is an O-methylated coumarin, which is found in the plants such as Cnidium monnieri, Angelica archangelica and Angelica pubescens.	C1(=CC=C2C(=C1CC=C(C)C)OC(C=C2)=O)OC	200	http://www.selleckchem.com/products/Osthole(Osthol).html
442	1642	L2000-21	e4	4	5	20170426	1	175	180		I15:20	A1:16, B:O7, B:O14, N1:6, O1:6	[1:20, 34:20:294, 27:20:287, 261:266, 281:286]	Rutin	S2350	other	Others	Others	610.52	153-18-4	free base	Rutin, a flavonol glycoside found in many plants including buckwheat; tobacco; forsythia; hydrangea; viola, etc., which possesses healthy effects for human.	C1(=C(C(C2=C(O1)C=C(C=C2O)O)=O)O[C@@H]3O[C@@H]([C@H]([C@@H]([C@@H]3O)O)O)CO[C@@H]4O[C@H]([C@@H]([C@H]([C@@H]4O)O)O)C)C5=CC(=C(C=C5)O)O	199	http://www.selleckchem.com/products/Rutin(Rutoside).html
443	1643	L2000-21	e5	5	5	20170426	1	155	160		H15:20	A1:16, B:O7, B:O14, N1:6, O1:6	[1:20, 34:20:294, 27:20:287, 261:266, 281:286]	Stigmasterol	S2361	other	Others	Others	412.69	83-48-7	free base	Stigmasterol is an unsaturated plant sterol, which may be useful in prevention of certain cancers.	C1[C@@H](CC2[C@](C1)([C@]3([C@@](CC=2)([C@]4([C@](CC3)([C@@](CC4)([C@@H](/C=C/[C@@H](CC)C(C)C)C)[H])C)[H])[H])[H])C)O	10	http://www.selleckchem.com/products/Stigmasterol(Stigmasterin).html
444	1644	L2000-21	e6	6	5	20170426	1	135	140		G15:20	A1:16, B:O7, B:O14, N1:6, O1:6	[1:20, 34:20:294, 27:20:287, 261:266, 281:286]	Ursolic Acid	S2370	other	Others	Others	456.7	77-52-1	free base	Ursolic acid (Malol) is a pentacyclic triterpene acid, used in cosmetics.	C1[C@@H](C([C@]2([C@](C1)([C@]3([C@@](CC2)([C@]4(C(=CC3)[C@@]5(C(CC4)[C@@H](C[C@H]([C@H]5C)C)C(=O)O)[H])C)C)[H])C)[H])(C)C)O	199	http://www.selleckchem.com/products/Ursolic-acid(Malol).html
445	1645	L2000-21	e7	7	5	20170426	1	115	120		F15:20	A1:16, B:O7, B:O14, N1:6, O1:6	[1:20, 34:20:294, 27:20:287, 261:266, 281:286]	Butylscopolamine Bromide	S2378	other	Others	Others	440.37	149-64-4	bromide	Butylscopolamine bromide, is a peripherally acting antimuscarinic, anticholinergic agent used as an abdominal-specific antispasmodic.	[Br-].C1=C(C=CC=C1)[C@@H](C(O[C@H]2C[C@]3([C@]4([C@@]([C@]([N+]3(CCCC)C)(C2)[H])(O4)[H])[H])[H])=O)CO	199	http://www.selleckchem.com/products/Butylscopolamine-bromide(Scopolamine-butylbromide).html
446	1646	L2000-21	e8	8	5	20170426	1	95	100		E15:20	A1:16, B:O7, B:O14, N1:6, O1:6	[1:20, 34:20:294, 27:20:287, 261:266, 281:286]	Lappaconite HBr	S2387	other	Others	Others	665.61	97792-45-5	hydrobromide	Lappaconite Hydrobromide is a kind of alkaloid extracted from Aconitum sinomontanum Nakai and has anti-inflammatory effects.	C1(C[C@@]2([C@@]3([C@@]4([C@@H]1OC)[C@@]5([C@]6([C@@]([C@H](C3)C4N(C2)CC)(C[C@@H]([C@]([C@@H]6OC)(C5)[H])OC)O)O)[H])[H])OC(C7=C(C=CC=C7)NC(=O)C)=O).Br	42	http://www.selleckchem.com/products/Lappaconite-Hydrobromide.html
447	1647	L2000-21	e9	9	5	20170426	1	75	80		D15:20	A1:16, B:O7, B:O14, N1:6, O1:6	[1:20, 34:20:294, 27:20:287, 261:266, 281:286]	Palmatine chloride	S2397	other	Others	Others	387.86	10605-02-4	chloride	Palmatine hydrochloride (Palmatine chloride (6CI,7CI); Fibrauretin) is a hydrochloride salt of palmatine which is a protoberberine alkaloid.	C1(=C(C(=C2C(=C1)C=C3[N+](=C2)CCC4=C3C=C(C(=C4)OC)OC)OC)OC).[Cl-]	201	http://www.selleckchem.com/products/Palmatine-chloride.html
448	1648	L2000-21	e10	10	5	20170426	1	55	60		C15:20	A1:16, B:O7, B:O14, N1:6, O1:6	[1:20, 34:20:294, 27:20:287, 261:266, 281:286]	Paeoniflorin	S2410	other	Others	Others	480.46	23180-57-6	free base	Paeoniflorin is a herbal constituent extracted from the root of Paeonia albiflora Pall.	[C@H]1([C@H]([C@@H]([C@H]([C@@H](O1)O[C@]23[C@@]4([C@@]5(O[C@]2(C)C[C@]([C@@]4(C3)[H])(O5)O)[H])COC(C6=CC=CC=C6)=O)O)O)O)CO	199	http://www.selleckchem.com/products/paeoniflorin.html
449	1649	L2000-21	e11	11	5	20170426	1	35	40		B15:20	A1:16, B:O7, B:O14, N1:6, O1:6	[1:20, 34:20:294, 27:20:287, 261:266, 281:286]	Levosimendan	S2446	other	Others	Others	280.28	141505-33-1	free base	Levosimendan is a calcium sensitizer acting through calcium-dependent binding to cardiac troponin C (cTnC), provides treatment for heart failure. Phase 4.	C(C(C#N)=NNC1C=CC(=CC=1)C2[C@@H](CC(NN=2)=O)C)#N	199	http://www.selleckchem.com/products/levosimendan.html
450	1650	L2000-21	f2	2	6	20170426	1	208	213		K8:13	A1:16, B:O7, B:O14, N1:6, O1:6	[1:20, 34:20:294, 27:20:287, 261:266, 281:286]	Myricitrin	S2327	other	Others	Others	464.38	17912-87-7	free base	Myricitrin, a flavonoid compound isolated from the root bark of Myrica cerifera, which exerts antinociceptive effects.	C1(=CC(=C2C(=C1)OC(=C(C2=O)O[C@@H]3O[C@H]([C@@H]([C@H]([C@@H]3O)O)O)C)C4=CC(=C(C(=C4)O)O)O)O)O	200	http://www.selleckchem.com/products/Myricitrin(Myricitrine).html
451	1651	L2000-21	f3	3	6	20170426	1	188	193		J8:13	A1:16, B:O7, B:O14, N1:6, O1:6	[1:20, 34:20:294, 27:20:287, 261:266, 281:286]	Oxymatrine	S2338	other	Others	Others	264.36	16837-52-8	free base	Oxymatrine is a quinolizidine alkaloid extracted from the root of Sophora flavescens, which is used for the treatment of viral hepatitis, cancer, viral myocarditis, gastrointestinal hemorrhage and skin diseases.	C1CC[N+]2([C@]3([C@]1(CN4[C@@]([C@](CCC2)3[H])(CCCC4=O)[H])[H])[H])[O-]	200	http://www.selleckchem.com/products/Oxymatrine(Matrine-N-oxide).html
452	1652	L2000-21	f4	4	6	20170426	1	168	173		I8:13	A1:16, B:O7, B:O14, N1:6, O1:6	[1:20, 34:20:294, 27:20:287, 261:266, 281:286]	Salicin	S2351	other	Others	Others	286.28	138-52-3	free base	Salicin is a phenol β-glycosid produced from willow bark that shows anti-inflammatory effects.	[C@H]1([C@H]([C@@H]([C@H]([C@@H](O1)OC2=CC=CC=C2CO)O)O)O)CO	199	http://www.selleckchem.com/products/Salicin(Salicoside,-Salicine).html
453	1653	L2000-21	f5	5	6	20170426	1	148	153		H8:13	A1:16, B:O7, B:O14, N1:6, O1:6	[1:20, 34:20:294, 27:20:287, 261:266, 281:286]	Tangeretin	S2363	other	Others	Others	372.37	481-53-8	free base	Tangeretin, a natural polymethoxylated flavone concentrated in the peel of citrus fruits, is known to have antiproliferative, antiinvasive, antimetastatic and antioxidant activities.	C1(=C(C(=C2C(=C1OC)OC(=CC2=O)C3=CC=C(C=C3)OC)OC)OC)OC	21	http://www.selleckchem.com/products/Tangeretin(Tangeritin).html
454	1654	L2000-21	f6	6	6	20170426	1	128	133		G8:13	A1:16, B:O7, B:O14, N1:6, O1:6	[1:20, 34:20:294, 27:20:287, 261:266, 281:286]	Vanillylacetone	S2371	other	Others	Others	194.23	122-48-5	free base	Vanillylacetone is similar in chemical structure to other flavor chemicals such as vanillin and eugenol and is used as a flavor additive in spice oils and in perfumery to introduce spicy aromas.	C1=C(C(=CC(=C1)CCC(C)=O)OC)O	10	http://www.selleckchem.com/products/Vanillylacetone.html
455	1655	L2000-21	f7	7	6	20170426	1	108	113		F8:13	A1:16, B:O7, B:O14, N1:6, O1:6	[1:20, 34:20:294, 27:20:287, 261:266, 281:286]	Dioscin	S2379	other	Others	Others	869.04	19057-60-4	free base	Dioscin is a saponin extracted and isolated from Polygonatum Zanlanscianense Pamp, showing antitumor activities.	[C@H]1([C@H]([C@@H](O[C@]([C@H]1O)(O[C@H]2[C@H](O)[C@H]([C@@](O[C@H]2CO)(O[C@H]3CC4[C@](CC3)([C@]5([C@@](CC=4)([C@]6([C@](CC5)([C@]7([C@](C6)(O[C@]8([C@@H]7C)OC[C@@H](CC8)C)[H])[H])C)[H])[H])[H])C)[H])O[C@]9([C@@H]([C@@H]([C@H]([C@@H](O9)C)O)O)O)[H])[H])C)O)O	200	http://www.selleckchem.com/products/Dioscin(Collettiside-III).html
456	1656	L2000-21	f8	8	6	20170426	1	88	93		E8:13	A1:16, B:O7, B:O14, N1:6, O1:6	[1:20, 34:20:294, 27:20:287, 261:266, 281:286]	L-carnitine	S2388	other	Others	Others	161.2	541-15-1	free base	L-carnitine is constituent of striated muscle and liver. It is used therapeutically to stimulate gastric and pancreatic secretions and in the treatment of hyperlipoproteinemias.	C(C[C@H](C[N+](C)(C)C)O)([O-])=O	74	http://www.selleckchem.com/products/L-carnitine(Levocarnitine).html
457	1657	L2000-21	f9	9	6	20170426	1	68	73		D8:13	A1:16, B:O7, B:O14, N1:6, O1:6	[1:20, 34:20:294, 27:20:287, 261:266, 281:286]	Dihydromyricetin	S2399	other	Others	Others	320.25	27200-12-0	free base	Dihydromyricetin (Ampelopsin, Ampeloptin) is a natural antioxidant flavonoid from Ampelopsis grossedentata.	C1(=CC(=C2C(=C1)O[C@@H]([C@H](C2=O)O)C3=CC(=C(C(=C3)O)O)O)O)O	199	http://www.selleckchem.com/products/Dihydromyricetin-Ampeloptin.html
458	1658	L2000-21	f10	10	6	20170426	1	48	53		C8:13	A1:16, B:O7, B:O14, N1:6, O1:6	[1:20, 34:20:294, 27:20:287, 261:266, 281:286]	Geniposide	S2411	other	Others	Others	388.37	24512-63-8	free base	Geniposide is an iridoid glycoside isolated from the fruit of Gardenia jasminoides Ellis.	[C@H]1([C@H](O[C@H]([C@@H]([C@@H]1O)O)O[C@@H]2OC=C([C@@]3([C@@]2(C(=CC3)CO)[H])[H])C(=O)OC)CO)O	10	http://www.selleckchem.com/products/geniposide.html
459	1659	L2000-21	f11	11	6	20170426	1	28	33		B8:13	A1:16, B:O7, B:O14, N1:6, O1:6	[1:20, 34:20:294, 27:20:287, 261:266, 281:286]	Clindamycin HCl	S2457	other	Others	Others	461.44	21462-39-5	hydrochloride	Clindamycin hydrochloride(Dalacin) is the hydrated hydrochloride salt of clindamycin which is a semisynthetic antibiotic.	[C@H]1([C@H]([C@H]([C@H](O[C@H]1SC)[C@H](C(C)Cl)NC(=O)[C@H]2N(C[C@@H](C2)CCC)C)O)O)O.Cl	199	http://www.selleckchem.com/products/Clindamycin-hydrochloride(Dalacin).html
460	1660	L2000-21	g2	2	7	20170426	1	201	206		K1:6	A1:16, B:O7, B:O14, N1:6, O1:6	[1:20, 34:20:294, 27:20:287, 261:266, 281:286]	Naringin	S2329	other	PI3K/Akt/mTOR	Others	580.53	10236-47-2	free base	Naringin is a flavanone glycoside, which exerts a variety of pharmacological effects such as antioxidant activity, blood lipid lowering, anticancer activity, and inhibition of cytochrome P450 enzymes.	C1=C(C=C2C(=C1O)C(C[C@H](O2)C3=CC=C(C=C3)O)=O)O[C@@H]4O[C@@H]([C@H]([C@@H]([C@@H]4O[C@@H]5O[C@H]([C@@H]([C@H]([C@@H]5O)O)O)C)O)O)CO	199	http://www.selleckchem.com/products/Naringin(Naringoside).html
461	1661	L2000-21	g3	3	7	20170426	1	181	186		J1:6	A1:16, B:O7, B:O14, N1:6, O1:6	[1:20, 34:20:294, 27:20:287, 261:266, 281:286]	Paeonol	S2339	other	Others	Others	166.17	552-41-0	free base	Paeonol (Peonol), a phenolic compound extracted from Chinese herbs Paeonia suffruticosa (moutan cortex) and Cynanchum paniculatum, inhibits MAO with an IC50 of about 50 &mu;M.	C1(=C(C=C(C=C1)OC)O)C(=O)C	198	http://www.selleckchem.com/products/Paeonol(Peonol).html
462	1662	L2000-21	g4	4	7	20170426	1	161	166		I1:6	A1:16, B:O7, B:O14, N1:6, O1:6	[1:20, 34:20:294, 27:20:287, 261:266, 281:286]	Sclareol	S2354	other	Others	Others	308.5	515-03-7	free base	Sclareol, a labdane-type diterpene isolated from clary sage (Salvia sclarea), exerts growth inhibition and cytotoxic activity against a variety of human cancer cell lines.	C1[C@@]([C@@H]([C@@]2(C(C1)C(CCC2)(C)C)C)CCC(C)(C=C)O)(C)O	10	http://www.selleckchem.com/products/Sclareol.html
463	1663	L2000-21	g5	5	7	20170426	1	141	146		H1:6	A1:16, B:O7, B:O14, N1:6, O1:6	[1:20, 34:20:294, 27:20:287, 261:266, 281:286]	Tanshinone I	S2364	other	Others	Others	276.29	568-73-0	free base	Tanshinone I, an active principle isolated from Salvia miltiorrhiza (Danshen), is structurally similar to tanshinone IIA and may possess similar cytotoxic effects on tumor cells.	C1=CC=C2C(=C1C)C=CC3=C2C(C(C4=C3OC=C4C)=O)=O	83	http://www.selleckchem.com/products/Tanshinone-I.html
464	1664	L2000-21	g6	6	7	20170426	1	121	126		G1:6	A1:16, B:O7, B:O14, N1:6, O1:6	[1:20, 34:20:294, 27:20:287, 261:266, 281:286]	Xanthone	S2372	other	Others	Others	196.2	90-47-1	free base	Xanthone is an organic compound, which can be prepared by the heating of phenyl salicylate.	C1=CC=C2C(=C1)C(C3=C(O2)C=CC=C3)=O	10	http://www.selleckchem.com/products/Xanthone(Genicide).html
465	1665	L2000-21	g7	7	7	20170426	1	101	106		F1:6	A1:16, B:O7, B:O14, N1:6, O1:6	[1:20, 34:20:294, 27:20:287, 261:266, 281:286]	Diosmetin	S2380	other	Others	Others	300.26	520-34-3	free base	Diosmetin is a bioflavonoid found in spearmint, oregano, and many other plants.	C1(=CC(=C2C(=C1)OC(=CC2=O)C3=CC=C(C(=C3)O)OC)O)O	199	http://www.selleckchem.com/products/Diosmetin(Luteolin-4-methyl-ether).html
466	1666	L2000-21	g8	8	7	20170426	1	81	86		E1:6	A1:16, B:O7, B:O14, N1:6, O1:6	[1:20, 34:20:294, 27:20:287, 261:266, 281:286]	Naringin Dihydrochalcone	S2389	other	Others	Others	582.55	18916-17-1	free base	Naringin Dihydrochalcone(Naringin DC) is a new-style sweetening agent and an artificial sweetener derived from naringin.	C1(=CC(=C(C(=C1)O)C(CCC2=CC=C(C=C2)O)=O)O)O[C@@H]3O[C@@H]([C@H]([C@@H]([C@@H]3O[C@]4([C@@H]([C@@H]([C@H]([C@@H](O4)C)O)O)O)[H])O)O)CO	10	http://www.selleckchem.com/products/Naringin-Dihydrochalcone(Naringin-DC).html
467	1667	L2000-21	g9	9	7	20170426	1	61	66		D1:6	A1:16, B:O7, B:O14, N1:6, O1:6	[1:20, 34:20:294, 27:20:287, 261:266, 281:286]	Sodium Danshensu	S2401	other	Others	Others,P450 (e.g. CYP17)	220.15	67920-52-9	sodium	Sodium Danshensu is a mono sodium of danshensu, which is a natural phenolic acid of caffeic acid derivatives isolated from Salvia miltiorrhiza.	C1(=C(C=CC(=C1)CC(C(=O)[O-])O)O)O.[Na+]	10	http://www.selleckchem.com/products/Sodium-Danshensu.html
468	1668	L2000-21	g10	10	7	20170426	1	41	46		C1:6	A1:16, B:O7, B:O14, N1:6, O1:6	[1:20, 34:20:294, 27:20:287, 261:266, 281:286]	Genipin	S2412	other	Others	Others	226.23	6902-77-8	free base	Genipin is an active aglycone derived from an iridoid glycoside called geniposide, which is found in the fruit of Gardenia jasminoides Ellis.	O1C=C([C@@]2([C@]([C@H]1O)(C(=CC2)CO)[H])[H])C(=O)OC	198	http://www.selleckchem.com/products/genipin.html
469	1669	L2000-21	g11	11	7	20170426	1	21	26		B1:6	A1:16, B:O7, B:O14, N1:6, O1:6	[1:20, 34:20:294, 27:20:287, 261:266, 281:286]	Famciclovir	S2467	other	Others	Others	321.33863	104227-87-4	free base	Famciclovir(Famvir) is a guanine analogue antiviral drug used for the treatment of various herpesvirus infections.	N1=C(N=C2C(=C1)N=CN2CCC(COC(=O)C)COC(C)=O)N	199	http://www.selleckchem.com/products/Famciclovir(Famvir).html
470	1670	L2000-21	h2	2	8	20170426	1	295	300		O15:20	A1:16, B:O7, B:O14, N1:6, O1:6	[1:20, 34:20:294, 27:20:287, 261:266, 281:286]	Neohesperidin	S2332	other	Others	Others	610.56	13241-33-3	free base	Neohesperidin, a flavanone glycoside found in citrus fruits, is an antioxidant agent.	C1=C(C=C2C(=C1O)C(C[C@H](O2)C3=CC(=CC(=C3)O)OC)=O)O[C@@H]4O[C@@H]([C@H]([C@@H]([C@@H]4O[C@@H]5O[C@H]([C@@H]([C@H]([C@@H]5O)O)O)C)O)O)CO	199	http://www.selleckchem.com/products/Neohesperidin.html
471	1671	L2000-21	h3	3	8	20170426	1	275	280		M15:20	A1:16, B:O7, B:O14, N1:6, O1:6	[1:20, 34:20:294, 27:20:287, 261:266, 281:286]	Phlorizin	S2343	other	Others	Others	436.41	60-81-1	free base	Phlorizin is a dihydrochalcone found in the bark of pear (Pyrus communis), apple, cherry and other fruit trees.	C1(=CC(=CC(=C1C(CCC2=CC=C(C=C2)O)=O)O[C@@H]3O[C@@H]([C@H]([C@@H]([C@@H]3O)O)O)CO)O)O	199	http://www.selleckchem.com/products/Phlorizin(Phloridzin).html
472	1672	L2000-21	h4	4	8	20170426	1	255	260		N15:20	A1:16, B:O7, B:O14, N1:6, O1:6	[1:20, 34:20:294, 27:20:287, 261:266, 281:286]	Sclareolide	S2355	other	Others	Others	250.38	564-20-5	free base	Sclareolide(Norambreinolide) is a sesquiterpene lactone natural product derived from various plant sources including Salvia sclarea, Salvia yosgadensis, and cigar tobacco.	[C@@]12([C@@](CC[C@@]3([C@]1(CCCC3(C)C)C)[H])(OC(C2)=O)C)[H]	10	http://www.selleckchem.com/products/Sclareolide(Norambreinolide).html
473	1673	L2000-21	h5	5	8	20170426	1	235	240		L15:20	A1:16, B:O7, B:O14, N1:6, O1:6	[1:20, 34:20:294, 27:20:287, 261:266, 281:286]	Tanshinone IIA	S2365	other	Others	Others	294.34	568-72-9	free base	Tanshinone IIA(Tanshinone B) is the most abundant diterpene quinone in Danshen, Salviae miltiorrhizae Radix, a widely prescribed traditional herbal medicine that is used to treat cardiovascular and inflammatory diseases.	C1CC(C2=C(C1)C3=C(C=C2)C4=C(C(C3=O)=O)C(=CO4)C)(C)C	16	http://www.selleckchem.com/products/Tanshinone-IIA(Tanshinone-B).html
474	1674	L2000-21	h6	6	8	20170426	1	288	293		O8:13	A1:16, B:O7, B:O14, N1:6, O1:6	[1:20, 34:20:294, 27:20:287, 261:266, 281:286]	Yohimbine HCl	S2373	other	Others	Others	390.9	65-19-0	hydrochloride	Yohimbine has been used as a mydriatic and in the treatment of impotence. It is also alleged to be an aphrodisiac.	N1(C2=C(C3=C1C=CC=C3)CCN4[C@]2(C[C@]5([C@](C4)(CC[C@@H]([C@@H]5C(OC)=O)O)[H])[H])[H]).Cl	10	http://www.selleckchem.com/products/Yohimbine-hydrochloride(Antagonil).html
475	1675	L2000-21	h7	7	8	20170426	1	268	273		N8:13	A1:16, B:O7, B:O14, N1:6, O1:6	[1:20, 34:20:294, 27:20:287, 261:266, 281:286]	D-Mannitol	S2381	other	Others	Others	182.17	69-65-8	free base	D-Mannitol is an osmotic diuretic agent and a weak renal vasodilator.	OC[C@H]([C@H]([C@@H]([C@@H](CO)O)O)O)O	197	http://www.selleckchem.com/products/D-Mannitol(Osmitrol).html
476	1676	L2000-21	h8	8	8	20170426	1	248	253		M8:13	A1:16, B:O7, B:O14, N1:6, O1:6	[1:20, 34:20:294, 27:20:287, 261:266, 281:286]	Polydatin	S2390	other	Others	Others	390.38	65914-17-2	free base	Polydatin is a crystal component extracted from the root stem of perennial herbage Polygonum Cuspidatum Sieb.et Zucc.	[C@@H]1([C@@H]([C@H](O[C@H]([C@H]1O)OC2=CC(=CC(=C2)/C=C/C3=CC=C(C=C3)O)O)CO)O)O	199	http://www.selleckchem.com/products/Polydatin(Piceid).html
477	1677	L2000-21	h9	9	8	20170426	1	228	233		L8:13	A1:16, B:O7, B:O14, N1:6, O1:6	[1:20, 34:20:294, 27:20:287, 261:266, 281:286]	Isoliquiritigenin	S2404	other	Others	Others	256.25	961-29-5	free base	Isoliquiritigenin, an anti-tumor flavonoid from the root of Glycyrrhiza glabra, inhibits aldose reductase with an IC50 of 320 nM.	C1=C(C=CC(=C1)/C=C/C(C2=C(C=C(C=C2)O)O)=O)O	199	http://www.selleckchem.com/products/Isoliquiritigenin.html
478	1678	L2000-21	h10	10	8	20170426	1	241	246		M1:6	A1:16, B:O7, B:O14, N1:6, O1:6	[1:20, 34:20:294, 27:20:287, 261:266, 281:286]	Geniposidic acid	S2413	other	Others	Others	374.34	27741-01-1	free base	Geniposidic acid is an effective anticancer and radioprotection agent.	C1O[C@H]([C@]2([C@@](C=1C(=O)O)(CC=C2CO)[H])[H])O[C@@H]3O[C@@H]([C@H]([C@@H]([C@@H]3O)O)O)CO	42	http://www.selleckchem.com/products/geniposidic-acid.html
479	1679	L2000-21	h11	11	8	20170426	1	221	226		L1:6	A1:16, B:O7, B:O14, N1:6, O1:6	[1:20, 34:20:294, 27:20:287, 261:266, 281:286]	Fluocinolone Acetonide	S2470	other	Others	Others	452.4999	67-73-2	free base	Fluocinolone Acetonide is a corticosteroid that binds to the cytosolic glucocorticoid receptor.	C1C(C=C2[C@](C=1)([C@]3([C@@](C[C@]2([H])F)([C@]4([C@](C[C@H]3O)([C@@]5([C@@](C4)(OC(O5)(C)C)[H])C(CO)=O)C)[H])[H])F)C)=O	198	http://www.selleckchem.com/products/Fluocinolone-acetonide(Flucort-N).html
480	1760	L2000-23	a2	2	1	20170428	0	215	220		K15:20	A1:16, B:O7, B:O14, N1:6, O1:6	[1:20, 34:20:294, 27:20:287, 261:266, 281:286]	Doxapram HCl	S4037	other	Others	Others	432.98	7081-53-0	hydrochloride	Doxapram HCl inhibits TASK-1, TASK-3, TASK-1/TASK-3 heterodimeric channel function with EC50 of 410 nM, 37 μM, 9 μM, respectively.	C1(C(C(CCN2CCOCC2)CN1CC)(C3=CC=CC=C3)C4=CC=CC=C4)=O.Cl.O	200	http://www.selleckchem.com/products/doxapram-hcl.html
481	1761	L2000-23	a3	3	1	20170428	0	195	200		J15:20	A1:16, B:O7, B:O14, N1:6, O1:6	[1:20, 34:20:294, 27:20:287, 261:266, 281:286]	Sodium Nitroprusside	S4059	other	Others	Others	261.92	14402-89-2	sodium	Sodium Nitroprusside is a potent vasodilator working through releasing NO spontaneously in blood.	[Fe](C#N)(C#N)(C#N)(C#N)(C#N)N=O.[Na+].[Na+].[R]	229	http://www.selleckchem.com/products/sodium-nitroprusside.html
482	1762	L2000-23	a4	4	1	20170428	0	175	180		I15:20	A1:16, B:O7, B:O14, N1:6, O1:6	[1:20, 34:20:294, 27:20:287, 261:266, 281:286]	Flumethasone	S4088	other	Others	Others	410.45	2135-17-3	free base	Flumethasone is a glucocorticoid receptor agonist, this complex binds to the nucleus causing a variety of genetic activation and repressions.	C1C(C=C2[C@](C=1)([C@]3([C@@](C[C@@H]2F)([C@]4([C@](C[C@H]3O)([C@@]([C@@H](C4)C)(O)C(CO)=O)C)[H])[H])F)C)=O	199	http://www.selleckchem.com/products/flumethasone.html
483	1763	L2000-23	a5	5	1	20170428	0	155	160		H15:20	A1:16, B:O7, B:O14, N1:6, O1:6	[1:20, 34:20:294, 27:20:287, 261:266, 281:286]	Dexlansoprazole	S4099	other	Others	Others	369.36	138530-94-6	free base	Dexlansoprazole, the dextrorotatory enantiomer of lansoprazole, is a proton pump inhibitor (PPI) formulated to have dual delayed-release properties.	C1(=CC=NC(=C1C)C[S@](C2=NC3=C(N2)C=CC=C3)=O)OCC(F)(F)F	200	http://www.selleckchem.com/products/dexlansoprazole.html
484	1764	L2000-23	a6	6	1	20170428	0	135	140		G15:20	A1:16, B:O7, B:O14, N1:6, O1:6	[1:20, 34:20:294, 27:20:287, 261:266, 281:286]	Deoxyarbutin	S4132	other	Others	Others	194.23	53936-56-4	free base	DeoxyArbutin is a reversible tyrosinase inhibitor, inhibiting tyrosinase activity with IC50 of 50 nM.	C1=C(C=CC(=C1)OC2CCCCO2)O	200	https://www.selleckchem.com/products/deoxyarbutin.html
485	1765	L2000-23	a7	7	1	20170428	0	115	120		F15:20	A1:16, B:O7, B:O14, N1:6, O1:6	[1:20, 34:20:294, 27:20:287, 261:266, 281:286]	Chlorzoxazone	S4155	other	Others	Others	169.57	95-25-0	free base	Chlorzoxazone is a muscle-relaxing drug,and a probe for human liver cytochrome P-450IIE1.	C12=C(NC(O1)=O)C=C(C=C2)Cl	200	http://www.selleckchem.com/products/chlorzoxazone.html
486	1766	L2000-23	a8	8	1	20170428	0	95	100		E15:20	A1:16, B:O7, B:O14, N1:6, O1:6	[1:20, 34:20:294, 27:20:287, 261:266, 281:286]	Teriflunomide	S4169	other	Others	Others	270.21	108605-62-5	free base	Teriflunomide is the active metabolite of leflunomide, inhibiting pyrimidine de novo synthesis by blocking the enzyme dihydroorotate dehydrogenase, used as an immunomodulatory agent.	C1(=CC=C(C=C1)C(F)(F)F)NC(/C(=C(/C)O)C#N)=O	118	http://www.selleckchem.com/products/teriflunomide.html
487	1767	L2000-23	a9	9	1	20170428	0	75	80		D15:20	A1:16, B:O7, B:O14, N1:6, O1:6	[1:20, 34:20:294, 27:20:287, 261:266, 281:286]	Nicardipine HCl	S4181	other	Others	Others	515.99	54527-84-3	hydrochloride	Nicardipine is a dihydropyridine calcium-channel blocking agent used for the treatment of vascular disorders.	C1(=C(NC(=C(C1C2=CC(=CC=C2)[N+](=O)[O-])C(OCCN(CC3=CC=CC=C3)C)=O)C)C)C(OC)=O.Cl	193	http://www.selleckchem.com/products/nicardipine-hcl.html
488	1768	L2000-23	a10	10	1	20170428	0	55	60		C15:20	A1:16, B:O7, B:O14, N1:6, O1:6	[1:20, 34:20:294, 27:20:287, 261:266, 281:286]	Azaguanine-8	S4194	other	Others	Others	152.11	134-58-7	free base	Azaguanine-8 is a purine analogs showing antineoplastic activity by competing with guanine in the metabolism.	C1(NC(C2=C(N=1)NN=N2)=O)N	39	http://www.selleckchem.com/products/azaguanine-8.html
489	1769	L2000-23	a11	11	1	20170428	0	35	40		B15:20	A1:16, B:O7, B:O14, N1:6, O1:6	[1:20, 34:20:294, 27:20:287, 261:266, 281:286]	Chromocarb	S4208	other	Others	Others	190.15	4940-39-0	free base	Chromocarb is a vasoprotectant.	C1=CC=C2C(=C1)C(C=C(O2)C(O)=O)=O	199	http://www.selleckchem.com/products/chromocarb.html
490	1770	L2000-23	b2	2	2	20170428	0	208	213		K8:13	A1:16, B:O7, B:O14, N1:6, O1:6	[1:20, 34:20:294, 27:20:287, 261:266, 281:286]	Norethindrone	S4040	other	Others	Others	298.42	68-22-4	free base	Norethindrone is a synthetic progestin, which mimic the actions of the endogenous ovarian hormone progesterone.	[C@@]12([C@@]([C@@](C#C)(O)CC1)(CC[C@@]3([C@]2(CCC4[C@@]3(CCC(C=4)=O)[H])[H])[H])C)[H]	201	http://www.selleckchem.com/products/norethindrone-norethisterone.html
491	1771	L2000-23	b3	3	2	20170428	0	188	193		J8:13	A1:16, B:O7, B:O14, N1:6, O1:6	[1:20, 34:20:294, 27:20:287, 261:266, 281:286]	Vitamin D3	S4063	other	Others	Others	384.64	67-97-0	free base	Vitamin D3 is a form of vitamin D, binds and activates a H305F/H397Y mutant vitamin D receptor (VDR) with EC50 of 300 nM.	C1[C@H](CCC(C/1=C/C=C2/[C@]3([C@](CCC2)([C@@H](CC3)[C@@H](CCCC(C)C)C)C)[H])=C)O	200	http://www.selleckchem.com/products/vitamin-d3-cholecalciferol.html
492	1772	L2000-23	b4	4	2	20170428	0	168	173		I8:13	A1:16, B:O7, B:O14, N1:6, O1:6	[1:20, 34:20:294, 27:20:287, 261:266, 281:286]	Halobetasol Propionate	S4089	other	Others	Others	484.96	66852-54-8	free base	Halobetasol Propionate is an anti-inflammatory and a dermatologic agent commonly used to treat psoriasis.	C1C(C=C2[C@](C=1)([C@]3([C@@](C[C@@H]2F)([C@]4([C@](C[C@H]3O)([C@@]([C@H](C4)C)(C(CCl)=O)OC(=O)CC)C)[H])[H])F)C)=O	200	http://www.selleckchem.com/products/halobetasol-propionate.html
493	1773	L2000-23	b5	5	2	20170428	0	148	153		H8:13	A1:16, B:O7, B:O14, N1:6, O1:6	[1:20, 34:20:294, 27:20:287, 261:266, 281:286]	Esmolol HCl	S4100	other	Others	Others	331.83	81161-17-3	hydrochloride	Esmolol is a cardioselective b-blocker, used to control rapid heartbeats or abnormal heart rhythms.	C1(=C(C=CC(=C1)OCC(CNC(C)C)O)CCC(OC)=O).Cl	198	http://www.selleckchem.com/products/esmolol-hcl.html
494	1774	L2000-23	b6	6	2	20170428	0	128	133		G8:13	A1:16, B:O7, B:O14, N1:6, O1:6	[1:20, 34:20:294, 27:20:287, 261:266, 281:286]	Carprofen	S4136	other	Others	Others	273.71	53716-49-7	free base	Carprofen inhibits canine COX2 with IC50 of 0.03 mM.	OC(C(C1C=CC2=C(C=1)NC3=C2C=C(C=C3)Cl)C)=O	200	http://www.selleckchem.com/products/carprofen.html
495	1775	L2000-23	b7	7	2	20170428	0	108	113		F8:13	A1:16, B:O7, B:O14, N1:6, O1:6	[1:20, 34:20:294, 27:20:287, 261:266, 281:286]	Bezafibrate	S4159	other	Others	Others	361.82	41859-67-0	free base	Bezafibrate is the first clinically tested dual and pan-PPAR co-agonism.	C1=C(C=CC(=C1)C(=O)NCCC2=CC=C(C=C2)OC(C)(C)C(=O)O)Cl	198	http://www.selleckchem.com/products/bezafibrate.html
496	1776	L2000-23	b8	8	2	20170428	0	88	93		E8:13	A1:16, B:O7, B:O14, N1:6, O1:6	[1:20, 34:20:294, 27:20:287, 261:266, 281:286]	Coumarin	S4170	other	Others	Others	146.14	91-64-5	free base	Coumarin is a secondary phytochemical with hepatotoxic and carcinogenic properties.	O1C(=O)C=CC2C=CC=CC1=2	198	http://www.selleckchem.com/products/coumarin.html
497	1777	L2000-23	b9	9	2	20170428	0	68	73		D8:13	A1:16, B:O7, B:O14, N1:6, O1:6	[1:20, 34:20:294, 27:20:287, 261:266, 281:286]	Nifuroxazide	S4182	other	Others	Others	275.22	965-52-6	free base	Nifuroxazide is a cell-permeable and orally available nitrofuran-based antidiarrheal agent that effectively suppresses the activation of cellular STAT1/3/5 transcription activity with IC50 of 3 μM against IL-6-induced STAT3 activation in U3A cells	C1=C(OC(=C1)/C=N/NC(C2=CC=C(C=C2)O)=O)[N+]([O-])=O	199	http://www.selleckchem.com/products/nifuroxazide.html
498	1778	L2000-23	b10	10	2	20170428	0	48	53		C8:13	A1:16, B:O7, B:O14, N1:6, O1:6	[1:20, 34:20:294, 27:20:287, 261:266, 281:286]	Ethacridine lactate monohydrate	S4196	other	Others	Others	361.39	6402-23-9	lactate	Ethacridine lactate monohydrate is an aromatic organic compound based on acridine used as an antiseptic agent.	C1(=C(C=C2C(=C1)C(=C3C(=N2)C=CC(=C3)OCC)N)N).OC(C(O)=O)C.O	199	http://www.selleckchem.com/products/ethacridine-lactate-monohydrate.html
499	1779	L2000-23	b11	11	2	20170428	0	28	33		B8:13	A1:16, B:O7, B:O14, N1:6, O1:6	[1:20, 34:20:294, 27:20:287, 261:266, 281:286]	Chlorocresol	S4209	other	Others	Others	142.58	59-50-7	free base	Chlorocresol is an activator of ryanodine receptor	C1(=C(C=CC(=C1)O)Cl)C	203	http://www.selleckchem.com/products/chlorocresol.html
500	1780	L2000-23	c2	2	3	20170428	0	201	206		K1:6	A1:16, B:O7, B:O14, N1:6, O1:6	[1:20, 34:20:294, 27:20:287, 261:266, 281:286]	Olsalazine Sodium	S4041	other	Others	Others	346.2	6054-98-4	free base	Olsalazine Sodium is a anti-inflammatory prodrug, which consists of two 5-ASA moieties linked by an azo bond.	C1(=CC(=CC=C1O)/N=N/C2=CC=C(C(=C2)C([O-])=O)O)C(=O)[O-].[Na+].[Na+]	11	http://www.selleckchem.com/products/olsalazine-sodium.html
501	1781	L2000-23	c3	3	3	20170428	0	181	186		J1:6	A1:16, B:O7, B:O14, N1:6, O1:6	[1:20, 34:20:294, 27:20:287, 261:266, 281:286]	Guanidine HCl	S4070	other	Others	Others	95.53	50-01-1	hydrochloride	Guanidine HCl, the crystalline compound of strong alkalinity formed by the oxidation of guanine, is a normal product of protein metabolism and a protein denaturant.	NC(N)=N.Cl	198	http://www.selleckchem.com/products/guanidine-aminoformamidine-hcl.html
502	1782	L2000-23	c4	4	3	20170428	0	161	166		I1:6	A1:16, B:O7, B:O14, N1:6, O1:6	[1:20, 34:20:294, 27:20:287, 261:266, 281:286]	Fenspiride HCl	S4090	other	Others	Others	296.79	8/7/5053	hydrochloride	Fenspiride is a bronchodilator with anti-inflammatory properties, inhibiting phosphodiesterase 4 and phosphodiesterase 3 activities with logIC50 values of 4.16 and 3.44, respectively, in human isolated bronchi.	C1(=CC=CC=C1CCN2CCC3(CC2)CNC(O3)=O).Cl	30	http://www.selleckchem.com/products/Fenspiride-hcl.html
503	1783	L2000-23	c5	5	3	20170428	0	141	146		H1:6	A1:16, B:O7, B:O14, N1:6, O1:6	[1:20, 34:20:294, 27:20:287, 261:266, 281:286]	Voglibose	S4101	other	Others	Others	267.28	83480-29-9	free base	Voglibose is an N-substituted derivative of valiolamine, excellent inhibitory activity against α-glucosidases and its action against hyperglycemia and various disorders caused by hyperglycemia.	[C@@H]1([C@@H]([C@H]([C@H](C[C@@]1(O)CO)NC(CO)CO)O)O)O	276	http://www.selleckchem.com/products/voglibose.html
504	1784	L2000-23	c6	6	3	20170428	0	121	126		G1:6	A1:16, B:O7, B:O14, N1:6, O1:6	[1:20, 34:20:294, 27:20:287, 261:266, 281:286]	Eprazinone 2HCl	S4137	other	Others	Others	453.44	10402-53-6	hydrochloride	Eprazinone is a mucolytic.	C(C1=CC=CC=C1)(CN2CCN(CC2)CC(C(C3C=CC=CC=3)=O)C)OCC.Cl.Cl	10	http://www.selleckchem.com/products/eprazinone-2hcl.html
505	1785	L2000-23	c7	7	3	20170428	0	101	106		F1:6	A1:16, B:O7, B:O14, N1:6, O1:6	[1:20, 34:20:294, 27:20:287, 261:266, 281:286]	Penicillin G Sodium	S4160	other	Others	Others	356.37	69-57-8	sodium	Penicillin G Sodium is a β-lactam antibiotic produced by <i>Penicillin spp</i>	N12([C@@]([C@@H](C1=O)NC(CC3=CC=CC=C3)=O)(SC([C@@H]2C(=O)[O-])(C)C)[H]).[Na+]	199	http://www.selleckchem.com/products/benzylpenicillin-sodium.html
506	1786	L2000-23	c8	8	3	20170428	0	81	86		E1:6	A1:16, B:O7, B:O14, N1:6, O1:6	[1:20, 34:20:294, 27:20:287, 261:266, 281:286]	Choline Chloride	S4171	other	Others	Others	139.62	67-48-1	chloride	Choline chloride is a quaternary ammonium salt used as an additive for animal feed.	C([N+](C)(C)C)CO.[Cl-]	200	http://www.selleckchem.com/products/choline-chloride.html
507	1787	L2000-23	c9	9	3	20170428	0	61	66		D1:6	A1:16, B:O7, B:O14, N1:6, O1:6	[1:20, 34:20:294, 27:20:287, 261:266, 281:286]	Tiratricol	s4185	other	Others	Others	621.93	51-24-1	free base	Tiratricol (also known as TRIAC or triiodothyroacetic acid) is a thyroid hormone analogue.	C1(=CC=C(C=C1I)OC2=C(C=C(C=C2I)CC(O)=O)I)O	160	http://www.selleckchem.com/products/tiratricol.html
508	1788	L2000-23	c10	10	3	20170428	0	41	46		C1:6	A1:16, B:O7, B:O14, N1:6, O1:6	[1:20, 34:20:294, 27:20:287, 261:266, 281:286]	Bemegride	S4197	other	Others	Others	155.19	64-65-3	free base	Bemegride is a central nervous system stimulant and antidote for barbiturate poisoning.	C1(CC(CC(N1)=O)(CC)C)=O	199	http://www.selleckchem.com/products/bemegride.html
509	1789	L2000-23	c11	11	3	20170428	0	21	26		B1:6	A1:16, B:O7, B:O14, N1:6, O1:6	[1:20, 34:20:294, 27:20:287, 261:266, 281:286]	Benzocaine	S4210	other	Others	Others	165.19	94-09-7	free base	Benzocaine is the ethyl ester of p-aminobenzoic acid (PABA), it is a local anesthetic commonly used as a topical pain reliever or in cough drops.	C1(=CC=C(C=C1)C(=O)OCC)N	199	http://www.selleckchem.com/products/benzocaine.html
510	1790	L2000-23	d2	2	4	20170428	0	295	300		O15:20	A1:16, B:O7, B:O14, N1:6, O1:6	[1:20, 34:20:294, 27:20:287, 261:266, 281:286]	Pheniramine Maleate	S4045	other	Others	Others	356.42	132-20-7	maleate	Pheniramine Maleate is an antihistamine with anticholinergic properties used to treat allergic conditions such as hay fever or urticaria.	C1(=CC=CC(=C1)C(CCN(C)C)C2=NC=CC=C2).C(/C=C\C(O)=O)(O)=O	199	http://www.selleckchem.com/products/pheniramine-maleate.html
511	1791	L2000-23	d3	3	4	20170428	0	275	280		M15:20	A1:16, B:O7, B:O14, N1:6, O1:6	[1:20, 34:20:294, 27:20:287, 261:266, 281:286]	Sodium Nitrite	S4074	other	Others	Others	69	7632-00-0	sodium	Sodium nitrite is a myeloperoxidase inhibitor with IC50 of 1.3 μM.	[O-]N=O.[Na+]	10	http://www.selleckchem.com/products/sodium-nitrite.html
512	1792	L2000-23	d4	4	4	20170428	0	255	260		N15:20	A1:16, B:O7, B:O14, N1:6, O1:6	[1:20, 34:20:294, 27:20:287, 261:266, 281:286]	Pramoxine HCl	S4092	other	Others	Others	329.86	637-58-1	hydrochloride	Pramoxine is a topical local anesthetic that has been shown to have antipruritic properties.	Cl.C1=C(C=CC(=C1)OCCCN2CCOCC2)OCCCC	200	http://www.selleckchem.com/products/pramoxine-hcl.html
513	1793	L2000-23	d5	5	4	20170428	0	235	240		L15:20	A1:16, B:O7, B:O14, N1:6, O1:6	[1:20, 34:20:294, 27:20:287, 261:266, 281:286]	Eprosartan Mesylate	S4102	other	Others	Others	520.62	144143-96-4	free base	Eprosartan is a nonpeptide angiotensin II receptor antagonist, [3H]-eprosartan binds to the AT1 receptor with KD of 0.83 nM in rat vascular smooth muscle cells.	C1(=C(C=CC(=C1)CN2C(=CN=C2CCCC)/C=C(/C(O)=O)CC3SC=CC=3)C(=O)O).CS(=O)(=O)O	199	http://www.selleckchem.com/products/eprosartan-mesylate.html
514	1794	L2000-23	d6	6	4	20170428	0	288	293		O8:13	A1:16, B:O7, B:O14, N1:6, O1:6	[1:20, 34:20:294, 27:20:287, 261:266, 281:286]	Dropropizine	S4138	other	Others	Others	236.31	17692-31-8	free base	Dropropizine is a racemic non-opiate antitussive agent, it is used as a cough suppressant.	N1(C2=CC=CC=C2)CCN(CC1)CC(CO)O	198	http://www.selleckchem.com/products/dropropizine.html
515	1795	L2000-23	d7	7	4	20170428	0	268	273		N8:13	A1:16, B:O7, B:O14, N1:6, O1:6	[1:20, 34:20:294, 27:20:287, 261:266, 281:286]	Benzoic Acid	S4161	other	Others	Others	122.12	65-85-0	free base	Benzoic acid is a colorless crystalline solid and a simple aromatic carboxylic acid, used as a food preservative.	C1=CC=CC(=C1)C(O)=O	196	http://www.selleckchem.com/products/benzoic-acid.html
516	1796	L2000-23	d8	8	4	20170428	0	248	253		M8:13	A1:16, B:O7, B:O14, N1:6, O1:6	[1:20, 34:20:294, 27:20:287, 261:266, 281:286]	Cetylpyridinium Chloride	S4172	other	Others	Others	339.99	123-03-5	chloride	Cetylpyridinium chloride is a cationic quaternary ammonium compound used as oropharyngeal antiseptic.	[N+]1(=CC=CC=C1)CCCCCCCCCCCCCCCC.[Cl-]	200	http://www.selleckchem.com/products/cetylpyridinium-chloride.html
517	1797	L2000-23	d9	9	4	20170428	0	228	233		L8:13	A1:16, B:O7, B:O14, N1:6, O1:6	[1:20, 34:20:294, 27:20:287, 261:266, 281:286]	Domiphen Bromide	S4186	other	Others	Others	414.46	538-71-6	free base	Domiphen bromide is a quaternary ammonium antiseptic with actions as a cationic surfactant.	C(CCCCCCCCCC[N+](CCOC1=CC=CC=C1)(C)C)C.[Br-]	200	http://www.selleckchem.com/products/domiphen-bromide.html
518	1798	L2000-23	d10	10	4	20170428	0	241	246		M1:6	A1:16, B:O7, B:O14, N1:6, O1:6	[1:20, 34:20:294, 27:20:287, 261:266, 281:286]	Verapamil HCl	S4202	other	Others	Others	491.06	152-11-4	hydrochloride	Verapamil HCl is an L-type calcium channel blocker that is a class IV anti-arrhythmia agent.	Cl.C1=C(C=C(C(=C1)OC)OC)C(CCCN(C)CCC2=CC=C(C(=C2)OC)OC)(C#N)C(C)C	199	http://www.selleckchem.com/products/verapami-hcl.html
519	1799	L2000-23	d11	11	4	20170428	0	221	226		L1:6	A1:16, B:O7, B:O14, N1:6, O1:6	[1:20, 34:20:294, 27:20:287, 261:266, 281:286]	Montelukast Sodium	S4211	other	Others	Others	608.17	151767-02-1	sodium	Montelukast selectively antagonizes leukotriene D 4 (LTD4) by binding to it so that block the action of leukotriene D4 on the cysteinyl leukotriene receptor CysLT1.	N1(C2C=C(Cl)C=CC=2C=CC=1/C=C/C3=CC([C@H](SCC4(CC4)CC(=O)[O-])CCC5C(C(O)(C)C)=CC=CC=5)=CC=C3).[Na+]	164	http://www.selleckchem.com/products/montelukast-sodium.html
520	1800	L2000-23	e2	2	5	20170428	1	215	220		K15:20	A1:16, B:O7, B:O14, N1:6, O1:6	[1:20, 34:20:294, 27:20:287, 261:266, 281:286]	Bisacodyl	S4047	other	Others	Others	361.39	603-50-9	free base	Bisacodyl (INN) is a stimulant laxative drug that works directly on the colon to produce a bowel movement.	C1(=CC=C(C=C1)OC(=O)C)C(C2=CC=CC=N2)C3=CC=C(C=C3)OC(=O)C	199	http://www.selleckchem.com/products/bisacodyl.html
521	1801	L2000-23	e3	3	5	20170428	1	195	200		J15:20	A1:16, B:O7, B:O14, N1:6, O1:6	[1:20, 34:20:294, 27:20:287, 261:266, 281:286]	Mequinol	S4077	other	Others	Others	124.14	150-76-5	free base	Mequinol (4-Methoxyphenol) is a depigmentation agent.	C1=CC(=CC=C1O)OC	201	http://www.selleckchem.com/products/mequinol.html
522	1802	L2000-23	e4	4	5	20170428	1	175	180		I15:20	A1:16, B:O7, B:O14, N1:6, O1:6	[1:20, 34:20:294, 27:20:287, 261:266, 281:286]	Difluprednate	S4095	other	Others	Others	508.55	23674-86-4	free base	Difluprednate (difluoroprednisolone butyrate acetate, or DFBA) is a synthetic difluorinated prednisolone derivative, it originally developed for dermatologic applications.	C1(C=C2[C@](C=C1)([C@]3([C@@](C[C@@H]2F)([C@]4([C@](C[C@H]3O)([C@@](CC4)(C(COC(C)=O)=O)OC(=O)CCC)C)[H])[H])F)C)=O	200	http://www.selleckchem.com/products/difluprednate.html
523	1803	L2000-23	e5	5	5	20170428	1	155	160		H15:20	A1:16, B:O7, B:O14, N1:6, O1:6	[1:20, 34:20:294, 27:20:287, 261:266, 281:286]	Diminazene Aceturate	S4104	other	Others	Others	515.52	908-54-3	aceturate	Diminazene is a di-amidine also known as 4,4-(1-Triazene–1,3–diyl)bis(benzenecarboximidamide), used as an effective trypanocidal agent.	C1(=C(C=CC(=C1)/N=N/NC2=CC=C(C=C2)C(=N)N)C(N)=N).OC(CNC(=O)C)=O.OC(CNC(=O)C)=O	36	http://www.selleckchem.com/products/diminazene-aceturate.html
524	1804	L2000-23	e6	6	5	20170428	1	135	140		G15:20	A1:16, B:O7, B:O14, N1:6, O1:6	[1:20, 34:20:294, 27:20:287, 261:266, 281:286]	Amprolium HCl	S4144	other	Others	Others	315.24	137-88-2	hydrochloride	Amprolium chloride is a thiamin antagonist, which prevents carbohydrate synthesis by blocking thiamine uptake.	C1(=CC=C[N+](=C1C)CC2=CN=C(N=C2N)CCC).Cl.[Cl-]	10	http://www.selleckchem.com/products/amprolium-hcl.html
525	1805	L2000-23	e7	7	5	20170428	1	115	120		F15:20	A1:16, B:O7, B:O14, N1:6, O1:6	[1:20, 34:20:294, 27:20:287, 261:266, 281:286]	Doxofylline	S4164	other	Others	Others	266.25	69975-86-6	free base	Doxofylline is a phosphodiesterase inhibitor and a xanthine derivative drug for asthma.	N1(C(N(C2=C(C1=O)N(C=N2)CC3OCCO3)C)=O)C	199	http://www.selleckchem.com/products/doxofylline.html
526	1806	L2000-23	e8	8	5	20170428	1	95	100		E15:20	A1:16, B:O7, B:O14, N1:6, O1:6	[1:20, 34:20:294, 27:20:287, 261:266, 281:286]	1-Hexadecanol	S4173	other	Others	Others	242.44	36653-82-4	free base	1-Hexadecanol is a fatty alcohol used to make other chemicals.	C(CCCCCCCO)CCCCCCCC	280	http://www.selleckchem.com/products/1-hexadecanol.html
527	1807	L2000-23	e9	9	5	20170428	1	75	80		D15:20	A1:16, B:O7, B:O14, N1:6, O1:6	[1:20, 34:20:294, 27:20:287, 261:266, 281:286]	Sasapyrine	S4188	other	Others	Others	258.23	552-94-3	free base	Sasapyrine (salsalate) is a nonsteroidal oral anti-inflammatory agent.	C(C1C(=CC=CC=1)O)(=O)OC2C(=CC=CC=2)C(=O)O	201	http://www.selleckchem.com/products/sasapyrine.html
528	1808	L2000-23	e10	10	5	20170428	1	55	60		C15:20	A1:16, B:O7, B:O14, N1:6, O1:6	[1:20, 34:20:294, 27:20:287, 261:266, 281:286]	Isosorbide	S4204	other	Others	Others	146.14	652-67-5	free base	Isosorbide is a heterocyclic compound that is derived from glucose, used as a diuretic.	[C@@H]1(CO[C@]2([C@]1(OC[C@H]2O)[H])[H])O	198	http://www.selleckchem.com/products/isosorbide.html
529	1809	L2000-23	e11	11	5	20170428	1	35	40		B15:20	A1:16, B:O7, B:O14, N1:6, O1:6	[1:20, 34:20:294, 27:20:287, 261:266, 281:286]	Sucralose	S4214	other	Others	Others	397.63	56038-13-2	free base	Sucralose is an artificial and noncaloric sweetener, not broken down by the body.	[C@H]1([C@@H]([C@H]([C@H](O[C@H]1CO)O[C@@]2(O[C@@H]([C@H]([C@H]2O)O)CCl)CCl)O)O)Cl	201	http://www.selleckchem.com/products/sucralose.html
530	1810	L2000-23	f2	2	6	20170428	1	208	213		K8:13	A1:16, B:O7, B:O14, N1:6, O1:6	[1:20, 34:20:294, 27:20:287, 261:266, 281:286]	Carbimazole	S4048	other	Others	Others	186.23	22232-54-8	free base	Carbimazole is an imidazole antithyroid agent.	C1N(C(N(C=1)C)=S)C(=O)OCC	204	http://www.selleckchem.com/products/carbimazole.html
531	1811	L2000-23	f3	3	6	20170428	1	188	193		J8:13	A1:16, B:O7, B:O14, N1:6, O1:6	[1:20, 34:20:294, 27:20:287, 261:266, 281:286]	Lomerizine HCl	S4084	other	Others	Others	541.46	101477-54-7	hydrochloride	Lomerizine dihydrochloride is a relatively new L- and T-type calcium channel blocker used in the treatment of migraine.	C(N1CCN(CC1)CC2=C(C(=C(C=C2)OC)OC)OC)(C3=CC=C(C=C3)F)C4(=CC=C(C=C4)F).Cl.Cl	10	http://www.selleckchem.com/products/lomerizine-hcl.html
532	1812	L2000-23	f4	4	6	20170428	1	168	173		I8:13	A1:16, B:O7, B:O14, N1:6, O1:6	[1:20, 34:20:294, 27:20:287, 261:266, 281:286]	Droperidol	S4096	other	Others	Others	379.43	548-73-2	free base	Droperidol is a potent antagonist of dopamine subtype 2 receptors in the limbic system.	C1C=CC2=C(C=1)NC(N2C3CCN(CC=3)CCCC(=O)C4=CC=C(C=C4)F)=O	200	http://www.selleckchem.com/products/droperidol.html
533	1813	L2000-23	f5	5	6	20170428	1	148	153		H8:13	A1:16, B:O7, B:O14, N1:6, O1:6	[1:20, 34:20:294, 27:20:287, 261:266, 281:286]	Triclabendazole	S4114	other	Others	Others	359.66	68786-66-3	free base	Triclabendazole is a benzimidazole, it binds to tubulin impairing intracellular transport mechanisms and interferes with protein synthesis.	C1=C(C(=C(C=C1)OC2=CC3=C(C=C2Cl)NC(=N3)SC)Cl)Cl	200	http://www.selleckchem.com/products/triclabendazole.html
534	1814	L2000-23	f6	6	6	20170428	1	128	133		G8:13	A1:16, B:O7, B:O14, N1:6, O1:6	[1:20, 34:20:294, 27:20:287, 261:266, 281:286]	Amfenac Sodium Monohydrate	S4149	other	Others	Others	295.27	61618-27-7	free base	Amfenac Sodium monohydrate is a non-steroidal analgesic anti-inflammatory drug with acetic acid moiety.	C1(C(C2=CC=CC=C2)=O)(=C(C(=CC=C1)CC(=O)[O-])N).O.[Na+]	199	http://www.selleckchem.com/products/amfenac-sodium-monohydrate.html
535	1815	L2000-23	f7	7	6	20170428	1	108	113		F8:13	A1:16, B:O7, B:O14, N1:6, O1:6	[1:20, 34:20:294, 27:20:287, 261:266, 281:286]	Benzydamine HCl	S4165	other	Others	Others	345.87	132-69-4	hydrochloride	Benzydamine hydrochloride is a topical nonsteroidal anti-inflammatory drug (NSAID) with anti-inflammatory, analgesic, antipyretic and local anesthetic activity.	C1(=CC=C2C(=C1)N(N=C2OCCCN(C)C)CC3=CC=CC=C3).Cl	199	http://www.selleckchem.com/products/benzydamine-hcl.html
536	1816	L2000-23	f8	8	6	20170428	1	88	93		E8:13	A1:16, B:O7, B:O14, N1:6, O1:6	[1:20, 34:20:294, 27:20:287, 261:266, 281:286]	Trometamol	S4176	other	Others	Others	121.14	77-86-1	free base	Trometamol is a proton acceptor used to treat academia.	C(CO)(CO)(CO)N	16	http://www.selleckchem.com/products/trometamol.html
537	1817	L2000-23	f9	9	6	20170428	1	68	73		D8:13	A1:16, B:O7, B:O14, N1:6, O1:6	[1:20, 34:20:294, 27:20:287, 261:266, 281:286]	Cyclandelate	S4189	other	Others	Others	276.37	456-59-7	free base	Cyclandelate is an effective inhibitor of rat hepatic acycloenzyme A: cholesterol acyltransferase (ACAT) with IC50 of 80 μM.	C1C(CC(CC1OC(=O)C(C2=CC=CC=C2)O)(C)C)C	199	http://www.selleckchem.com/products/cyclandelate.html
538	1818	L2000-23	f10	10	6	20170428	1	48	53		C8:13	A1:16, B:O7, B:O14, N1:6, O1:6	[1:20, 34:20:294, 27:20:287, 261:266, 281:286]	Dibenzothiophene	S4205	other	Others	Others	184.26	132-65-0	free base	Dibenzothiophene (DBT) is a model compound for organic sulfur in fossil fuels.	C1=CC=C2C(=C1)SC3=C2C=CC=C3	200	http://www.selleckchem.com/products/dibenzothiophene.html
539	1819	L2000-23	f11	11	6	20170428	1	28	33		B8:13	A1:16, B:O7, B:O14, N1:6, O1:6	[1:20, 34:20:294, 27:20:287, 261:266, 281:286]	Liothyronine Sodium	S4217	other	Others	Others	672.96	55-06-1	free base	Liothyronine Sodium is the most potent form of thyroid hormone acting on the body to increase the basal metabolic rate, affect protein synthesis.	C1(OC2C=C(C(=CC=2)O)I)(=C(C=C(C=C1I)C[C@@H](C(=O)[O-])N)I).[Na+]	148	http://www.selleckchem.com/products/liothyronine-sodium.html
540	1820	L2000-23	g2	2	7	20170428	1	201	206		K1:6	A1:16, B:O7, B:O14, N1:6, O1:6	[1:20, 34:20:294, 27:20:287, 261:266, 281:286]	Methyclothiazide	S4057	other	Others	Others	360.24	135-07-9	free base	Methyclothiazide is a substituted benzothiadiazide, used to treat high blood pressure and fluid retention caused by various conditions including heart disease.	C1(=C(C=C2C(=C1)S(N(C(N2)CCl)C)(=O)=O)Cl)S(=O)(=O)N	199	http://www.selleckchem.com/products/methyclothiazide.html
541	1821	L2000-23	g3	3	7	20170428	1	181	186		J1:6	A1:16, B:O7, B:O14, N1:6, O1:6	[1:20, 34:20:294, 27:20:287, 261:266, 281:286]	Loxapine Succinate	S4086	other	Others	Others	445.9	27833-64-3	succinate	Loxapine Succinate is a D2DR and D4DR inhibitor, serotonergic receptor antagonist and also a dibenzoxazepine anti-psychotic agent.	C1(C2=C(OC3=C(N=1)C=CC=C3)C=CC(=C2)Cl)N4(CCN(CC4)C).C(CC(O)=O)C(O)=O	199	http://www.selleckchem.com/products/loxapine-succinate.html
542	1822	L2000-23	g4	4	7	20170428	1	161	166		I1:6	A1:16, B:O7, B:O14, N1:6, O1:6	[1:20, 34:20:294, 27:20:287, 261:266, 281:286]	Dydrogesterone	S4097	other	Others	Others	312.45	152-62-5	free base	Dydrogesterone is an orally active progestogen which acts directly on the uterus, producing a complete secretory endometrium in an estrogen-primed uterus.	C1C(C=C2[C@@](C1)([C@@]3([C@@](C=C2)([C@]4([C@](CC3)([C@](CC4)([H])C(=O)C)C)[H])[H])[H])C)=O	201	http://www.selleckchem.com/products/dydrogesterone.html
543	1823	L2000-23	g5	5	7	20170428	1	141	146		H1:6	A1:16, B:O7, B:O14, N1:6, O1:6	[1:20, 34:20:294, 27:20:287, 261:266, 281:286]	Isovaleramide	S4116	other	Others	Others	101.15	541-46-8	free base	Isovaleramide is an anticonvulsant molecule isolated from Valeriana pavonii, it inhibits the liver alcohol dehydrogenases.	CC(CC(N)=O)C	197	http://www.selleckchem.com/products/isovaleramide.html
544	1824	L2000-23	g6	6	7	20170428	1	121	126		G1:6	A1:16, B:O7, B:O14, N1:6, O1:6	[1:20, 34:20:294, 27:20:287, 261:266, 281:286]	Penfluridol	S4151	other	Others	Others	523.97	26864-56-2	free base	Penfluridol is a highly potent, first generation diphenylbutylpiperidine antipsychotic.	C1(C2(CCN(CC2)CCCC(C3=CC=C(C=C3)F)C4C=CC(=CC=4)F)O)=CC(=C(C=C1)Cl)C(F)(F)F	190	http://www.selleckchem.com/products/penfluridol.html
545	1825	L2000-23	g7	7	7	20170428	1	101	106		F1:6	A1:16, B:O7, B:O14, N1:6, O1:6	[1:20, 34:20:294, 27:20:287, 261:266, 281:286]	Chlorpropamide	S4166	other	Others	Others	276.74	94-20-2	free base	Chlorpropamide is a sulfonylurea class drug for type 2 diabetes mellitus.	C1=C(C=CC(=C1)S(NC(=O)NCCC)(=O)=O)Cl	198	http://www.selleckchem.com/products/chlorpropamide.html
546	1826	L2000-23	g8	8	7	20170428	1	81	86		E1:6	A1:16, B:O7, B:O14, N1:6, O1:6	[1:20, 34:20:294, 27:20:287, 261:266, 281:286]	Uracil	S4177	other	Others	Others	112.09	66-22-8	free base	Uracil is one of the four nucleobases in the nucleic acid of RNA can be used for drug delivery and as a pharmaceutical.	N1C(C=CNC1=O)=O	196	http://www.selleckchem.com/products/uracil.html
547	1827	L2000-23	g9	9	7	20170428	1	61	66		D1:6	A1:16, B:O7, B:O14, N1:6, O1:6	[1:20, 34:20:294, 27:20:287, 261:266, 281:286]	Cinchophen	S4190	other	Others	Others	249.26	132-60-5	free base	Cinchophen is an analgesic drug that is frequently used to treat gout.	N1C(=CC(=C2C=CC=CC=12)C(=O)O)C3C=CC=CC=3	200	http://www.selleckchem.com/products/cinchophen.html
548	1828	L2000-23	g10	10	7	20170428	1	41	46		C1:6	A1:16, B:O7, B:O14, N1:6, O1:6	[1:20, 34:20:294, 27:20:287, 261:266, 281:286]	Cysteamine HCl	S4206	other	Others	Others	113.61	156-57-0	hydrochloride	Cysteamine is an agent for the treatment of nephropathic cystinosis and an antioxidant.	C(CS)N.Cl	202	http://www.selleckchem.com/products/cysteamine-hcl.html
549	1829	L2000-23	g11	11	7	20170428	1	21	26		B1:6	A1:16, B:O7, B:O14, N1:6, O1:6	[1:20, 34:20:294, 27:20:287, 261:266, 281:286]	Azaperone	S4219	other	Others	Others	327.4	1649-18-9	free base	Azaperone is a pyridinylpiperazine and butyrophenone neuroleptic drug with sedative and antiemetic effects, which is used mainly as a tranquilizer in veterinary medicine.	N1(C2=CC=CC=N2)CCN(CC1)CCCC(C3C=CC(=CC=3)F)=O	198	http://www.selleckchem.com/products/azaperone.html
550	1830	L2000-23	h2	2	8	20170428	1	295	300		O15:20	A1:16, B:O7, B:O14, N1:6, O1:6	[1:20, 34:20:294, 27:20:287, 261:266, 281:286]	Ropivacaine HCl	S4058	other	Others	Others	310.86	132112-35-7	hydrochloride	Ropivacaine HCl is an anaesthetic agent and blocks impulse conduction in nerve fibres through inhibiting sodium ion influx reversibly.	C1(CC[C@H](N(C1)CCC)C(=O)NC2=C(C=CC=C2C)C).Cl	199	http://www.selleckchem.com/products/ropivacaine-hcl.html
551	1831	L2000-23	h3	3	8	20170428	1	275	280		M15:20	A1:16, B:O7, B:O14, N1:6, O1:6	[1:20, 34:20:294, 27:20:287, 261:266, 281:286]	Oxymetholone	S4087	other	Others	Others	332.48	434-07-1	free base	Oxymetholone is a 17alpha -alkylated anabolic-androgenic steroid.	C1(/C(C[C@]2([C@](C1)([C@]3([C@@](CC2)([C@]4([C@](CC3)([C@](CC4)(C)O)C)[H])[H])[H])C)[H])=O)=C\O	201	http://www.selleckchem.com/products/oxymetholone.html
552	1832	L2000-23	h4	4	8	20170428	1	255	260		N15:20	A1:16, B:O7, B:O14, N1:6, O1:6	[1:20, 34:20:294, 27:20:287, 261:266, 281:286]	Halcinonide	S4098	other	Others	Others	454.96	3093-35-4	free base	Halcinonide is a high potency corticosteroid used in topical preparations as an anti-inflammatory agent.	C1C(C=C2[C@](C1)([C@]3([C@@](CC2)([C@]4([C@](C[C@H]3O)([C@@]5([C@@H](C4)OC(O5)(C)C)C(=O)CCl)C)[H])[H])F)C)=O	200	http://www.selleckchem.com/products/halcinonide.html
553	1833	L2000-23	h5	5	8	20170428	1	235	240		L15:20	A1:16, B:O7, B:O14, N1:6, O1:6	[1:20, 34:20:294, 27:20:287, 261:266, 281:286]	Troxipide	S4128	other	Others	Others	294.35	30751-05-4	free base	Troxipide is a novel systemic non-antisecretory gastric cytoprotective agent with anti-ulcer, anti-inflammatory and mucus secreting properties irrespective of pH of stomach or duodenum.	C1(=CC(=C(C(=C1)OC)OC)OC)C(NC2CCCNC2)=O	61	https://www.selleckchem.com/products/troxipide.html
554	1834	L2000-23	h6	6	8	20170428	1	288	293		O8:13	A1:16, B:O7, B:O14, N1:6, O1:6	[1:20, 34:20:294, 27:20:287, 261:266, 281:286]	Ethamsylate	S4152	other	Others	Others	263.31	2624-44-4	free base	Ethamsylate is a haemostatic drug, which inhibits biosynthesis and action of prostaglandins, and increases capillary endothelial resistance as and platelet adhesion.	C1(C(=CC=C(C=1)O)O)S(O)(=O)=O.N(CC)CC	201	http://www.selleckchem.com/products/ethamsylate.html
555	1835	L2000-23	h7	7	8	20170428	1	268	273		N8:13	A1:16, B:O7, B:O14, N1:6, O1:6	[1:20, 34:20:294, 27:20:287, 261:266, 281:286]	Cyromazine	S4167	other	Others	Others	166.18	66215-27-8	free base	Cyromazine is a triazine insect growth regulator used as an insecticide and an acaricide.	N1=C(N=C(N=C1NC2CC2)N)N	198	http://www.selleckchem.com/products/cyromazine.html
556	1836	L2000-23	h8	8	8	20170428	1	248	253		M8:13	A1:16, B:O7, B:O14, N1:6, O1:6	[1:20, 34:20:294, 27:20:287, 261:266, 281:286]	Nefopam HCl	S4180	other	Others	Others	289.8	23327-57-3	hydrochloride	Nefopam HCl is an centrally-acting but non-opioid analgesic drug by blocking voltage-gated sodium channel and inhibition of serotonin, dopamine and noradrenaline reuptake.	C12(=C(CN(CCOC1C3=CC=CC=C3)C)C=CC=C2).Cl	10	http://www.selleckchem.com/products/nefopam-hcl.html
557	1837	L2000-23	h9	9	8	20170428	1	228	233		L8:13	A1:16, B:O7, B:O14, N1:6, O1:6	[1:20, 34:20:294, 27:20:287, 261:266, 281:286]	Betamipron	S4191	other	Others	Others	193.2	3440-28-6	free base	Betamipron is a chemical compound which is used together with panipenem to inhibit panipenem uptake into the renal tubule and prevent nephrotoxicity.	C1=C(C=CC=C1)C(NCCC(O)=O)=O	201	http://www.selleckchem.com/products/betamipron.html
558	1838	L2000-23	h10	10	8	20170428	1	241	246		M1:6	A1:16, B:O7, B:O14, N1:6, O1:6	[1:20, 34:20:294, 27:20:287, 261:266, 281:286]	Clofibric Acid	S4207	other	Others	Others	214.65	882-09-7	free base	Clofibric acid is a PPARα agonist and hypolipidemic agent.	C1=C(C=CC(=C1)OC(C(=O)O)(C)C)Cl	200	http://www.selleckchem.com/products/clofibric-acid.html
559	1839	L2000-23	h11	11	8	20170428	1	221	226		L1:6	A1:16, B:O7, B:O14, N1:6, O1:6	[1:20, 34:20:294, 27:20:287, 261:266, 281:286]	Erythritol	S4224	other	Others	Others	122.12	149-32-6	free base	Erythritol is a sugar alcohol used as low-calorie sweetener.	[C@H]([C@H](CO)O)(CO)O	196	http://www.selleckchem.com/products/erythritol.html
560	1840	L2000-24	a2	2	1	20170501	0	215	220		K15:20	A1:16, B:O7, B:O14, N1:6, O1:6	[1:20, 34:20:294, 27:20:287, 261:266, 281:286]	Mexiletine HCl	S4225	other	Others	Others	215.72	1/4/5370	hydrochloride	Mexiletine HCl belongs to Class IB anti-arrhythmic group of medicines, inhibits sodium channels to reduce the inward sodium current.	C1(C(=CC=CC=1C)C)OCC(C)N.Cl	199	http://www.selleckchem.com/products/mexiletine-hcl.html
561	1841	L2000-24	a3	3	1	20170501	0	195	200		J15:20	A1:16, B:O7, B:O14, N1:6, O1:6	[1:20, 34:20:294, 27:20:287, 261:266, 281:286]	Cepharanthine	S4238	other	Others	Others	606.71	481-49-2	free base	Cepharanthine is a biscoclaurine alkaloid inhibiting tumor necrosis factor (TNF)-α-mediated NFκB stimulation, plasma membrane lipid peroxidation and platelet aggregation and suppressing cytokine production.	C1(=C2C=C3C(=C1)CCN([C@@]3([H])CC4=CC(=C(C=C4)OC)OC5=CC=C(C=C5)C[C@@]6(C7=C(CCN6C)C=C8C(=C7O2)OCO8)[H])C)OC	164	http://www.selleckchem.com/products/cepharanthine.html
562	1842	L2000-24	a4	4	1	20170501	0	175	180		I15:20	A1:16, B:O7, B:O14, N1:6, O1:6	[1:20, 34:20:294, 27:20:287, 261:266, 281:286]	Quinacrine 2HCl	S4255	other	Others	Others	472.88	69-05-6	hydrochloride		C1(=C2C(=NC3C1=CC=C(C=3)Cl)C=CC(=C2)OC)NC(CCCN(CC)CC)C.Cl.Cl	29	http://www.selleckchem.com/products/quinacrine-2hcl.html
563	1843	L2000-24	a5	5	1	20170501	0	155	160		H15:20	A1:16, B:O7, B:O14, N1:6, O1:6	[1:20, 34:20:294, 27:20:287, 261:266, 281:286]	Nicaraven	S4265	other	Others	Others	284.31	79455-30-4	free base		C1(C(NCC(NC(C2C=CC=NC=2)=O)C)=O)C=CC=NC=1	200	http://www.selleckchem.com/products/nicaraven.html
564	1844	L2000-24	a6	6	1	20170501	0	135	140		G15:20	A1:16, B:O7, B:O14, N1:6, O1:6	[1:20, 34:20:294, 27:20:287, 261:266, 281:286]	SC144	S7124	other	Others	Others	322.3	895158-95-9	free base	SC144 is an orally active small-molecule gp130 inhibitor.	C1=CC=C2N1C3=C(N=C2NNC(=O)C4=CN=CC=N4)C=C(C=C3)F	86	http://www.selleckchem.com/products/sc144.html
565	1845	L2000-24	a7	7	1	20170501	0	115	120		F15:20	A1:16, B:O7, B:O14, N1:6, O1:6	[1:20, 34:20:294, 27:20:287, 261:266, 281:286]	4E1RCat	S7370	other	Others	ELF4	478.45	328998-25-0	free base	4E1RCat is a dual inhibitor of eIF4E:eIF4G and eIF4E:4E-BP1 interaction, and inhibits the binding of eIF4G to eIF4E with IC50 of 3.2 μM.	C1=CC=C(C=C1)C2=CC(=CC3=CC=C(O3)C4=CC=C(C=C4)[N+](=O)[O-])C(=O)N2C5=CC=C(C=C5)C(=O)O	200	http://www.selleckchem.com/products/4e1rcat.html
566	1846	L2000-24	a8	8	1	20170501	0	95	100		E15:20	A1:16, B:O7, B:O14, N1:6, O1:6	[1:20, 34:20:294, 27:20:287, 261:266, 281:286]	(S)-crizotinib	S7505	other	Others	MTH	450.34	1374356-45-2	free base	(S)-crizotinib, the (S)-enantiomer of crizotinib, is a potent MTH1 (NUDT1) inhibitor with IC50 of 72 nM.	CC(C1=C(C=CC(=C1Cl)F)Cl)OC2=C(N=CC(=C2)C3=CN(N=C3)C4CCNCC4)N	99	http://www.selleckchem.com/products/s-crizotinib.html
567	1847	L2000-24	a9	9	1	20170501	0	75	80		D15:20	A1:16, B:O7, B:O14, N1:6, O1:6	[1:20, 34:20:294, 27:20:287, 261:266, 281:286]	Gabapentin Hydrochloride	S1338	other		GABA Receptor	207.7	60142-95-2		Gabapentin Hydrochloride is a GABA analogue.	C1(CCCC(C1)(CC(O)=O)CN).Cl
568	1848	L2000-24	a10	10	1	20170501	0	55	60		C15:20	A1:16, B:O7, B:O14, N1:6, O1:6	[1:20, 34:20:294, 27:20:287, 261:266, 281:286]	Norfloxacin (Norxacin)	S1509	other			319.33	70458-96-7		Norfloxacin (Norxacin) is a broad-spectrum antibiotic.	C1(=C(C=C2C(=C1)C(C(=CN2CC)C(O)=O)=O)N3CCNCC3)F
569	1849	L2000-24	a11	11	1	20170501	0	35	40		B15:20	A1:16, B:O7, B:O14, N1:6, O1:6	[1:20, 34:20:294, 27:20:287, 261:266, 281:286]	Ketoprofen	S1645	other	Neuronal Signaling	COX	254.28	22071-15-4	free base	Ketoprofen (Actron) is a non-selective NSAID with IC50 of 0.5 μM and 2.33 μM for human recombinant COX-1 and COX-2, respectively.	C1=CC=CC(=C1)C(C2=CC=CC(=C2)C(C(O)=O)C)=O	200	http://www.selleckchem.com/products/Ketoprofen(Actron).html
570	1850	L2000-24	b2	2	2	20170501	0	208	213		K8:13	A1:16, B:O7, B:O14, N1:6, O1:6	[1:20, 34:20:294, 27:20:287, 261:266, 281:286]	Fluorometholone Acetate	S4228	other	Others	Others	418.5	6/7/3801	free base	Fluorometholone Acetate is a synthetic corticosteroid, used in the treatment of steroid responsive inflammatory conditions of the eye.	[C@]12([C@]([C@]3([C@](C[C@]1([H])O)([C@@](OC(C)=O)(C(C)=O)CC3)C)[H])(C[C@@](C4[C@@]2(C=CC(C=4)=O)C)(C)[H])[H])F	200	http://www.selleckchem.com/products/fluorometholone-acetate.html
571	1851	L2000-24	b3	3	2	20170501	0	188	193		J8:13	A1:16, B:O7, B:O14, N1:6, O1:6	[1:20, 34:20:294, 27:20:287, 261:266, 281:286]	Bergapten	S4239	other	Others	Others	216.19	484-20-8	free base	Bergapten is a psoralen that can be photoactivated and is capable of crossing-linking DNA, covalently modifying proteins and lipids, and consequently inhibiting cell replication.	C1C(OC2=C(C=1)C(=C3C(=C2)OC=C3)OC)=O	23	http://www.selleckchem.com/products/bergapten.html
572	1852	L2000-24	b4	4	2	20170501	0	168	173		I8:13	A1:16, B:O7, B:O14, N1:6, O1:6	[1:20, 34:20:294, 27:20:287, 261:266, 281:286]	Buspirone HCl	S4256	other	Others	Others	421.96	33386-08-2	hydrochloride		C1(=CC=NC(=N1)N2CCN(CC2)CCCCN3C(CC4(CC3=O)CCCC4)=O).Cl	199	http://www.selleckchem.com/products/buspirone-hcl.html
573	1853	L2000-24	b5	5	2	20170501	0	148	153		H8:13	A1:16, B:O7, B:O14, N1:6, O1:6	[1:20, 34:20:294, 27:20:287, 261:266, 281:286]	Brimonidine Tartrate	S4266	other	Others	Others	442.22	70359-46-5	tartrate		C1(=NC2C(=CC=C(NC3=NCCN3)C=2Br)N=C1).[C@@H]([C@H](C(O)=O)O)(O)C(O)=O	198	http://www.selleckchem.com/products/brimonidine-tartrate.html
574	1854	L2000-24	b6	6	2	20170501	0	128	133		G8:13	A1:16, B:O7, B:O14, N1:6, O1:6	[1:20, 34:20:294, 27:20:287, 261:266, 281:286]	Thiamet G	S7213	other	Others	Others	248.3	1009816-48-1	free base	Thiamet G is a potent, selective O-GlcNAcase inhibitor with Kiof 21 nM, while exhibiting 37,000-fold selectivity over human lysosomal –hexosaminidase.	[C@H]1([C@H]([C@@H]([C@@]2([C@](O1)(SC(=N2)NCC)[H])[H])O)O)CO	201	http://www.selleckchem.com/products/thiamet-g.html
575	1855	L2000-24	b7	7	2	20170501	0	108	113		F8:13	A1:16, B:O7, B:O14, N1:6, O1:6	[1:20, 34:20:294, 27:20:287, 261:266, 281:286]	PTC-209	S7372	other	Others	BMI	495.19	315704-66-6	free base	PTC-209 is a potent and selective BMI-1 inhibitor with IC50 of 0.5 μM, and results in irreversible reduction of cancer-initiating cells (CICs).	CC1=C(N2C=CC=NC2=N1)C3=CSC(=N3)NC4=C(C=C(C=C4Br)OC)Br	199	http://www.selleckchem.com/products/ptc-209.html
576	1856	L2000-24	b8	8	2	20170501	0	88	93		E8:13	A1:16, B:O7, B:O14, N1:6, O1:6	[1:20, 34:20:294, 27:20:287, 261:266, 281:286]	VGX-1027	S7515	other	Others	Others	205.21	6501-72-0	free base	VGX-1027 is an orally active immunomodulator. Phase 1.	C1C(ON=C1C2=CC=CC=C2)CC(=O)O	199	http://www.selleckchem.com/products/vgx-1027.html
577	1857	L2000-24	b9	9	2	20170501	0	68	73		D8:13	A1:16, B:O7, B:O14, N1:6, O1:6	[1:20, 34:20:294, 27:20:287, 261:266, 281:286]	Biapenem	S1370	other			350.39	120410-24-4		Biapenem is a carbapenem antibiotic.	C1([C@@]([C@@]2(N1C(=C([C@@H]2C)SC3CN4[N+](C3)=CC=N4)C(=O)[O-])[H])(C(C)O)[H])=O
578	1858	L2000-24	b10	10	2	20170501	0	48	53		C8:13	A1:16, B:O7, B:O14, N1:6, O1:6	[1:20, 34:20:294, 27:20:287, 261:266, 281:286]	Cidofovir (Vistide)	S1516	other			279.19	113852-37-2		Cidofovir(Vistide) is an injectable antiviral medication for the treatment of cytomegalovirus (CMV) retinitis. (IC50= 0.94 μM).	C1(C=CN(C(N=1)=O)C[C@@H](CO)OCP(O)(O)=O)N
579	1859	L2000-24	b11	11	2	20170501	0	28	33		B8:13	A1:16, B:O7, B:O14, N1:6, O1:6	[1:20, 34:20:294, 27:20:287, 261:266, 281:286]	Ketorolac	S1646	other	Neuronal Signaling	COX	376.4	74103-07-4	tromethamine	Ketorolac (Ketorolac tromethamine) is a non-selective COX inhibitor of COX-1 and COX-2 with IC50 of 1.23 μM and 3.50 μM, respectively.	C1(=CC=C(C=C1)C(C2=CC=C3N2CCC3C(=O)O)=O).OCC(CO)(CO)N	199	http://www.selleckchem.com/products/Ketorolac-Tromethamine(Toradol
580	1860	L2000-24	c2	2	3	20170501	0	201	206		K1:6	A1:16, B:O7, B:O14, N1:6, O1:6	[1:20, 34:20:294, 27:20:287, 261:266, 281:286]	Oxybuprocaine HCl	S4229	other	Others	Others	344.88	5987-82-6	hydrochloride	Oxybuprocaine HCl is a local anesthetic, which is used especially in ophthalmology and otolaryngology.	C1(C=C(C(=CC=1)N)OCCCC)C(OCCN(CC)CC)=O.Cl	200	http://www.selleckchem.com/products/oxybuprocaine-hcl.html
581	1861	L2000-24	c3	3	3	20170501	0	181	186		J1:6	A1:16, B:O7, B:O14, N1:6, O1:6	[1:20, 34:20:294, 27:20:287, 261:266, 281:286]	Cetrimonium Bromide (CTAB)	S4242	other	Others	Others	364.45	57-09-0	free base	Cetrimonium Bromide is a known component of the broad-spectrum antiseptic cetrimide, which is a mixture of different quaternary ammonium salts.	CCCCCCCCCCCCCCCC[N+](C)(C)C.[Br-]	13	http://www.selleckchem.com/products/cetrimonium-bromide.html
582	1862	L2000-24	c4	4	3	20170501	0	161	166		I1:6	A1:16, B:O7, B:O14, N1:6, O1:6	[1:20, 34:20:294, 27:20:287, 261:266, 281:286]	Alizapride HCl	S4257	other	Others	Others	351.83	59338-87-3	hydrochloride		C12(=C(C=C(C(=C1)OC)C(NCC3N(CCC3)CC=C)=O)N=NN2).Cl	119	http://www.selleckchem.com/products/alizapride-hcl.html
583	1863	L2000-24	c5	5	3	20170501	0	141	146		H1:6	A1:16, B:O7, B:O14, N1:6, O1:6	[1:20, 34:20:294, 27:20:287, 261:266, 281:286]	Diacerein	S4267	other	Others	Others	368.29	13739-02-1	free base		C12=C(C=C(C=C1OC(C)=O)C(O)=O)C(C3=C(C2=O)C(=CC=C3)OC(=O)C)=O	130	http://www.selleckchem.com/products/diacerein.html
584	1864	L2000-24	c6	6	3	20170501	0	121	126		G1:6	A1:16, B:O7, B:O14, N1:6, O1:6	[1:20, 34:20:294, 27:20:287, 261:266, 281:286]	OAC1	S7217	other	Others	Others	237.26	300586-90-7	free base	OAC1 (Oct4-activating compound 1) can enhance the efficiency of reprogramming.	C1=CC=CC(=C1)C(NC2=CC3=C(C=N2)NC=C3)=O	198	http://www.selleckchem.com/products/oac1.html
585	1865	L2000-24	c7	7	3	20170501	0	101	106		F1:6	A1:16, B:O7, B:O14, N1:6, O1:6	[1:20, 34:20:294, 27:20:287, 261:266, 281:286]	CGP 57380	S7421	other	Others	MNK	244.23	522629-08-9	free base	CGP 57380 is potent MNK1 inhibitor with IC50 of 2.2 μM, exhibiting no inhibitory activity on p38, JNK1, ERK1 and -2, PKC, or c-Src-like kinases.	C1=CC(=CC=C1NC2=C3C(=NC=NC3=NN2)N)F	196	http://www.selleckchem.com/products/cgp57380.html
586	1866	L2000-24	c8	8	3	20170501	0	81	86		E1:6	A1:16, B:O7, B:O14, N1:6, O1:6	[1:20, 34:20:294, 27:20:287, 261:266, 281:286]	Y-320	S7516	other	Others	Others	505.01	288250-47-5	free base	Y-320 is an orally active immunomodulator, and inhibits IL-17 production by CD4 T cells stimulated with IL-15 with IC50 of 20 to 60 nM.	CC1=C(C=NN1C2=CC=C(C=C2)Cl)C(=O)NC3=CC(=C(C=C3)N4CCC(CC4)N5CCOCC5)C#N	21	http://www.selleckchem.com/products/y-320.html
587	1867	L2000-24	c9	9	3	20170501	0	61	66		D1:6	A1:16, B:O7, B:O14, N1:6, O1:6	[1:20, 34:20:294, 27:20:287, 261:266, 281:286]	Minoxidil	S1383	other		Lysyl Hydroxylase	209.25	38304-91-5		Minoxidil is a vasodilator medication known for its ability to slow or stop hair loss and promote hair regrowth.	C1CCN(CC1)C2=CC(=[N+](C(=N2)N)[O-])N
588	1868	L2000-24	c10	10	3	20170501	0	41	46		C1:6	A1:16, B:O7, B:O14, N1:6, O1:6	[1:20, 34:20:294, 27:20:287, 261:266, 281:286]	Ibuprofen Lysine (NeoProfen)	S1518	other		COX	352.47	57469-77-9		Ibuprofen Lysine(Motrin) is a non-steroidal anti-inflammatory drug.	C1(=CC=C(C=C1)C(C(O)=O)C)CC(C)C.C([C@H](CCCCN)N)(O)=O
589	1869	L2000-24	c11	11	3	20170501	0	21	26		B1:6	A1:16, B:O7, B:O14, N1:6, O1:6	[1:20, 34:20:294, 27:20:287, 261:266, 281:286]	Betamethasone Dipropionate (Diprolene)	S1688	other			504.59	5593-20-4		Betamethasone Dipropionate is a glucocorticoid steroid with anti-inflammatory and immunosuppressive abilities.	C1C(C=C2[C@](C=1)([C@]3([C@@](CC2)([C@]4([C@](C[C@H]3O)([C@@]([C@H](C4)C)(C(=O)COC(CC)=O)OC(=O)CC)C)[H])[H])F)C)=O
590	1870	L2000-24	d2	2	4	20170501	0	295	300		O15:20	A1:16, B:O7, B:O14, N1:6, O1:6	[1:20, 34:20:294, 27:20:287, 261:266, 281:286]	Oxaprozin	S4230	other	Others	Others	293.32	21256-18-8	free base	Oxaprozin is a non-narcotic, non-steroidal anti-inflammatory drug (NSAID) used to relieve the inflammation, swelling, stiffness, and joint pain associated with osteoarthritis and rheumatoid arthritis.	C1(=C(N=C(O1)CCC(=O)O)C2=CC=CC=C2)C3=CC=CC=C3	201	http://www.selleckchem.com/products/oxaprozin.html
591	1871	L2000-24	d3	3	4	20170501	0	275	280		M15:20	A1:16, B:O7, B:O14, N1:6, O1:6	[1:20, 34:20:294, 27:20:287, 261:266, 281:286]	Sodium ascorbate	S4245	other	Others	Others	201.13	134-03-2	sodium	Sodium Ascorbate is a more bioavailable form of vitamin C that is an alternative to taking ascorbic acid as a supplement.	[C@@]1(C(C(C(O1)=O)O)O)([C@H](CO)O)[H].[Na]	10	http://www.selleckchem.com/products/sodium-ascorbate.html
592	1872	L2000-24	d4	4	4	20170501	0	255	260		N15:20	A1:16, B:O7, B:O14, N1:6, O1:6	[1:20, 34:20:294, 27:20:287, 261:266, 281:286]	Luliconazole	S4258	other	Others	Others	354.28	187164-19-8	free base		C1([C@H]2S/C(=C(/N3C=CN=C3)C#N)SC2)C(=CC(=CC=1)Cl)Cl	200	http://www.selleckchem.com/products/luliconazole.html
593	1873	L2000-24	d5	5	4	20170501	0	235	240		L15:20	A1:16, B:O7, B:O14, N1:6, O1:6	[1:20, 34:20:294, 27:20:287, 261:266, 281:286]	Flufenamic acid	S4268	other	Others	Others	281.23	530-78-9	free base		C(C1C(=CC=CC=1)NC2C=C(C=CC=2)C(F)(F)F)(=O)O	199	http://www.selleckchem.com/products/flufenamic-acid.html
594	1874	L2000-24	d6	6	4	20170501	0	288	293		O8:13	A1:16, B:O7, B:O14, N1:6, O1:6	[1:20, 34:20:294, 27:20:287, 261:266, 281:286]	4μ8C	S7272	other	Others	Others	204.18	14003-96-4	free base	4μ8C is a potent and selective IRE1 Rnase inhibitor with IC50 of 76 nM.	C1(=CC=C2C(=C1C=O)OC(C=C2C)=O)O	93	http://www.selleckchem.com/products/4u8c.html
595	1875	L2000-24	d7	7	4	20170501	0	268	273		N8:13	A1:16, B:O7, B:O14, N1:6, O1:6	[1:20, 34:20:294, 27:20:287, 261:266, 281:286]	NH125	S7436	other	Others	ELF2	524.56	278603-08-0	free base	NH125 is a selective eEF-2 kinase inhibitor with IC50 of 60 nM, >125-fold selectivity over PKC, PKA, and CaMKII, and also a potent histidine kinase inhibitor.	CCCCCCCCCCCCCCCCN1C=C[N+](=C1C)CC2=CC=CC=C2.[I-]	190	http://www.selleckchem.com/products/nh125.html
596	1876	L2000-24	d8	8	4	20170501	0	248	253		M8:13	A1:16, B:O7, B:O14, N1:6, O1:6	[1:20, 34:20:294, 27:20:287, 261:266, 281:286]	AZD7545	S7517	other	Others	PDHK	478.87	252017-04-2	free base	AZD7545 is a potent PDHK inhibitor with IC50 of 36.8 nM and 6.4 nM for PDHK1 and PDHK2, respectively.	CC(C(=O)NC1=C(C=C(C=C1)S(=O)(=O)C2=CC=C(C=C2)C(=O)N(C)C)Cl)(C(F)(F)F)O	198	http://www.selleckchem.com/products/azd7545.html
597	1877	L2000-24	d9	9	4	20170501	0	228	233		L8:13	A1:16, B:O7, B:O14, N1:6, O1:6	[1:20, 34:20:294, 27:20:287, 261:266, 281:286]	Teicoplanin	S1399	other			1709.39	61036-62-2		Teicoplanin is an antibiotic used in the prophylaxis.	C12=C(Cl)C=C(C=C1)[C@@H](O[C@@H]3O[C@@H]([C@H]([C@@H]([C@@H]3NC(=O)C)O)O)CO)[C@H]4C(=O)N[C@H](C5=CC(=CC(=C5C6=C(C=CC(=C6)[C@@H](C(N4)=O)NC([C@@H]7C8C=C(O2)C(=C(C=8)OC9=CC=C(C=C9Cl)C[C@H]%10NC([C@@H](C%11=CC(=C(C=C%11)O)OC%12C=C(C=C([C@@H](C(N7)=O)NC%10=O)C=%12)O)N)=O)O[C@@H]%13O[C@@H]([C@H]([C@@H]([C@@H]%13NC(CCCCCCCC(C)C)=O)O)O)CO)=O)O)O[C@@H]%14[C@H]([C@H]([C@@H]([C@H](O%14)CO)O)O)O)O)C(=O)O
598	1878	L2000-24	d10	10	4	20170501	0	241	246		M1:6	A1:16, B:O7, B:O14, N1:6, O1:6	[1:20, 34:20:294, 27:20:287, 261:266, 281:286]	Alendronate (Fosamax)	S1624	other			326.13	121268-17-5		Alendronate Sodium (Fosamax) is a farnesyl diphosphate synthase inhibitor with IC50 of 460 nM.	P(C(CCCN)(P(=O)(O)O)O)(=O)(O)O.[Na].O.O.O
599	1879	L2000-24	d11	11	4	20170501	0	221	226		L1:6	A1:16, B:O7, B:O14, N1:6, O1:6	[1:20, 34:20:294, 27:20:287, 261:266, 281:286]	Betamethasone valerate (Betnovate)	S1690	other			476.58	2152-44-5		Betamethasone Valerate is a moderately potent glucocorticoid steroid with anti-inflammatory and immunosuppressive properties.	C1C(C=C2[C@](C=1)([C@]3([C@@](CC2)([C@]4([C@](C[C@H]3O)([C@@]([C@H](C4)C)(C(=O)CO)OC(=O)CCCC)C)[H])[H])F)C)=O
600	1880	L2000-24	e2	2	5	20170501	1	215	220		K15:20	A1:16, B:O7, B:O14, N1:6, O1:6	[1:20, 34:20:294, 27:20:287, 261:266, 281:286]	Pilocarpine HCl	S4231	other	Others	Others	244.72	54-71-7	hydrochloride	Pilocarpine HCl is a nonselective muscarinic acetylcholine receptor agonist used to produce an experimental model of epilepsy.	[C@H]1([C@@H](C(=O)OC1)CC)CC2(N(C=NC=2)C).Cl	200	http://www.selleckchem.com/products/pilocarpine-hcl.html
601	1881	L2000-24	e3	3	5	20170501	1	195	200		J15:20	A1:16, B:O7, B:O14, N1:6, O1:6	[1:20, 34:20:294, 27:20:287, 261:266, 281:286]	Bromfenac Sodium	S4248	other	Others	Others	356.15	91714-93-1	sodium	Bromfenac is a nonsteroidal anti-inflammatory drug (NSAID), which has anti-inflammatory activity and may block prostaglandin synthesis by inhibiting cyclooxygenase 1 and 2.	[Na+].C(CC1C(=C(C=CC=1)C(C2C=CC(=CC=2)Br)=O)N)(=O)[O-]	199	http://www.selleckchem.com/products/bromfenac-sodium.html
602	1882	L2000-24	e4	4	5	20170501	1	175	180		I15:20	A1:16, B:O7, B:O14, N1:6, O1:6	[1:20, 34:20:294, 27:20:287, 261:266, 281:286]	Vilazodone HCl	S4259	other	Others	Others	477.99	163521-08-2	hydrochloride		C12(=C(NC=C1CCCCN3CCN(CC3)C4=CC5=C(C=C4)OC(=C5)C(N)=O)C=CC(=C2)C#N).Cl	200	http://www.selleckchem.com/products/vilazodone-hcl.html
603	1883	L2000-24	e5	5	5	20170501	1	155	160		H15:20	A1:16, B:O7, B:O14, N1:6, O1:6	[1:20, 34:20:294, 27:20:287, 261:266, 281:286]	TTNPB (Arotinoid Acid)	S4627	other	Others	Others	348.48	71441-28-6	free base	TTNPB (Arotinoid Acid) is a potent RAR agonist, and inhibits binding of [3H]tRA with IC50 of 5.1 nM, 4.5 nM, and 9.3 nM for human RARα, β, and γ, respectively.	C12=C(C=CC(=C1)/C(=C/C3=CC=C(C=C3)C(O)=O)C)C(CCC2(C)C)(C)C	43	http://www.selleckchem.com/products/ttnpb-arotinoid-acid.html
604	1884	L2000-24	e6	6	5	20170501	1	135	140		G15:20	A1:16, B:O7, B:O14, N1:6, O1:6	[1:20, 34:20:294, 27:20:287, 261:266, 281:286]	STF-118804	S7316	other	Others	Others	461.53	894187-61-2	free base	STF-118804 is a highly specific NAMPT inhibitor.	C1=NC=C(C=C1)CNC(C2=CC=C(C=C2)C3OC(=C(N=3)CS(C4=CC=C(C=C4)C)(=O)=O)C)=O	132	http://www.selleckchem.com/products/stf-118804.html
605	1885	L2000-24	e7	7	5	20170501	1	115	120		F15:20	A1:16, B:O7, B:O14, N1:6, O1:6	[1:20, 34:20:294, 27:20:287, 261:266, 281:286]	Sal003	S7437	other	Others	ELF2	463.21	1164470-53-4	free base	Sal003 is a potent and cell-permeable eIF-2α phosphatase inhibitor.	C1=CC=C(C=C1)C=CC(=O)NC(C(Cl)(Cl)Cl)NC(=S)NC2=CC=C(C=C2)Cl	200	http://www.selleckchem.com/products/sal003.html
606	1886	L2000-24	e8	8	5	20170501	1	95	100		E15:20	A1:16, B:O7, B:O14, N1:6, O1:6	[1:20, 34:20:294, 27:20:287, 261:266, 281:286]	Dynasore	S8047	other	Others	Dynamin	322.31	304448-55-3	free base	Dynasore is a cell-permeable, reversible non-competitive dynamin inhibitor of GTPase activity of dynamin 1/2, with IC50 of 15 μM, also inhibits the mitochondrial dynamin Drp1, with no effect against other small GTPase.	C1(=C(C=C(C=C1)/C=N/NC(=O)C2=C(C=C3C(=C2)C=CC=C3)O)O)O	198	http://www.selleckchem.com/products/dynasore.html
607	1887	L2000-24	e9	9	5	20170501	1	75	80		D15:20	A1:16, B:O7, B:O14, N1:6, O1:6	[1:20, 34:20:294, 27:20:287, 261:266, 281:286]	Risedronate sodium	S1428	other			305.09	115436-72-1		Risedronate sodium is a bisphosphonate used to strengthen bone, treat or prevent osteoporosis, and treat Paget's disease of bone.	C1=CN=CC(=C1)CC(P(=O)(O)O[Na])(O)P(=O)(O)O
608	1888	L2000-24	e10	10	5	20170501	1	55	60		C15:20	A1:16, B:O7, B:O14, N1:6, O1:6	[1:20, 34:20:294, 27:20:287, 261:266, 281:286]	Naproxen	S1626	other	Neuronal Signaling	COX	252.24	26159-34-2	sodium	Naproxen is a COX inhibitor for COX-1 and COX-2 with IC50 of 8.7 μM and 5.2 μM, respectively.	C1(=C(C=C2C(=C1)C=C(C=C2)[C@@H](C([O-])=O)C)OC).[Na+]	11	http://www.selleckchem.com/products/Naproxen-Sodium(Aleve).html
609	1889	L2000-24	e11	11	5	20170501	1	35	40		B15:20	A1:16, B:O7, B:O14, N1:6, O1:6	[1:20, 34:20:294, 27:20:287, 261:266, 281:286]	Eplerenone	S1707	other			414.49	107724-20-9		Eplerenone (Inspra) is an aldosterone antagonist with an IC50 of 0.36 μM.	C1C(C=C2[C@](C1)([C@@]34[C@@]([C@@H](C2)C(OC)=O)([C@]5([C@](C[C@@H]3O4)([C@]6(CC5)CCC(O6)=O)C)[H])[H])C)=O
610	1890	L2000-24	f2	2	6	20170501	1	208	213		K8:13	A1:16, B:O7, B:O14, N1:6, O1:6	[1:20, 34:20:294, 27:20:287, 261:266, 281:286]	Nithiamide	S4232	other	Others	Others	187.18	140-40-9	free base	Nithiamide is a non-5-nitroimidazole drugs.	C1(SC([N+](=O)[O-])=CN=1)NC(C)=O	197	http://www.selleckchem.com/products/nithiamide.html
611	1891	L2000-24	f3	3	6	20170501	1	188	193		J8:13	A1:16, B:O7, B:O14, N1:6, O1:6	[1:20, 34:20:294, 27:20:287, 261:266, 281:286]	Sulfamethoxypyridazine	S4250	other	Others	Others	280.3	80-35-3	free base	Sulfamethoxypyridazine is a long-acting sulfonamide for treatment of Dermatitis herpetiformis.	C1(C=CC(=CC=1)N)S(=O)(=O)NC2C=CC(=NN=2)OC	199	http://www.selleckchem.com/products/sulfamethoxypyridazine.html
612	1892	L2000-24	f4	4	6	20170501	1	168	173		I8:13	A1:16, B:O7, B:O14, N1:6, O1:6	[1:20, 34:20:294, 27:20:287, 261:266, 281:286]	Tamibarotene	S4260	other	Others	Others	351.44	94497-51-5	free base	Tamibarotene, also called retinobenzoic acid, is orally active, synthetic retinoid, developed to overcome all-trans retinoic acid (ATRA) resistance, with potential antineoplastic activity against acute promyelocytic leukaemia (APL) .	C12=C(C=C(C=C1)NC(C3C=CC(=CC=3)C(O)=O)=O)C(CCC2(C)C)(C)C	199	http://www.selleckchem.com/products/tamibarotene.html
613	1893	L2000-24	f5	5	6	20170501	1	148	153		H8:13	A1:16, B:O7, B:O14, N1:6, O1:6	[1:20, 34:20:294, 27:20:287, 261:266, 281:286]	NXY-059	S6002	other	Others	Others	381.33	168021-79-2	free base	NXY-059 is a novel nitrone, shows efficacious neuroprotective effects.	C1(=CC=C(C=C1S(=O)(=O)[O-])S([O-])(=O)=O)/C=[N+](/C(C)(C)C)[O-].[Na+].[Na+]	199	http://www.selleckchem.com/products/NXY-059.html
614	1894	L2000-24	f6	6	6	20170501	1	128	133		G8:13	A1:16, B:O7, B:O14, N1:6, O1:6	[1:20, 34:20:294, 27:20:287, 261:266, 281:286]	Atglistatin	S7364	other	Others	ATGL	283.37	1469924-27-3	free base	Atglistatin is a highly potent, and selective inhibitor of adipose triglyceride lipase (ATGL) with IC50 of 0.7 μM, high selectivity over other key metabolic lipases.	CN(C)C1=CC=C(C=C1)C2=CC(=CC=C2)NC(=O)N(C)C	201	http://www.selleckchem.com/products/atglistatin.html
615	1895	L2000-24	f7	7	6	20170501	1	108	113		F8:13	A1:16, B:O7, B:O14, N1:6, O1:6	[1:20, 34:20:294, 27:20:287, 261:266, 281:286]	ZLN005	S7447	other	Others	Others	250.34	49671-76-3	free base	ZLN005 is a potent and tissue-specific PGC-1α transcriptional activator.	C1=CC=C2C(=C1)N=C(N2)C3=CC=C(C=C3)C(C)(C)C	147	http://www.selleckchem.com/products/ZLN005.html
616	1896	L2000-24	f8	8	6	20170501	1	88	93		E8:13	A1:16, B:O7, B:O14, N1:6, O1:6	[1:20, 34:20:294, 27:20:287, 261:266, 281:286]	RI-1	S8077	other	Others	Others	361.61	415713-60-9	free base	RI-1 is a RAD51 inhibitor with IC50 ranging from 5 to 30 μM.	C1(=CC(=CC=C1Cl)N2C(C(=C(C2=O)Cl)N3CCOCC3)=O)Cl	138	http://www.selleckchem.com/products/ri-1.html
617	1897	L2000-24	f9	9	6	20170501	1	68	73		D8:13	A1:16, B:O7, B:O14, N1:6, O1:6	[1:20, 34:20:294, 27:20:287, 261:266, 281:286]	Ofloxacin (Floxin)	S1463	other		Topoisomerase	361.37	82419-36-1		Ofloxacin is a synthetic broad-spectrum antimicrobial agent.	C1(C(=C2C3=C(C=1)C(C(=CN3C(CO2)C)C(O)=O)=O)N4CCN(CC4)C)F
618	1898	L2000-24	f10	10	6	20170501	1	48	53		C8:13	A1:16, B:O7, B:O14, N1:6, O1:6	[1:20, 34:20:294, 27:20:287, 261:266, 281:286]	Docosanol (Abreva)	S1637	other			326.6	661-19-8		Docosanol is a saturated fatty alcoholused traditionally as an emollient, emulsifier, and thickener in cosmetics, nutritional supplement. (ED50=2.5 mg/ml for plaque inhibition, and ED50=1.7 mg/ml for inhibition of virus production)	OCCCCCCCCCCCCCCCCCCCCCC
619	1899	L2000-24	f11	11	6	20170501	1	28	33		B8:13	A1:16, B:O7, B:O14, N1:6, O1:6	[1:20, 34:20:294, 27:20:287, 261:266, 281:286]	Eplerenone	S1707	other		Others	414.49	107724-20-9		Eplerenone is an aldosterone antagonist with an IC50 of 0.36 μM.	C1C(C=C2[C@](C1)([C@@]34[C@@]([C@@H](C2)C(OC)=O)([C@]5([C@](C[C@@H]3O4)([C@]6(CC5)CCC(O6)=O)C)[H])[H])C)=O
620	1900	L2000-24	g2	2	7	20170501	1	201	206		K1:6	A1:16, B:O7, B:O14, N1:6, O1:6	[1:20, 34:20:294, 27:20:287, 261:266, 281:286]	Zoxazolamine	S4233	other	Others	Others	168.58	61-80-3	free base	Zoxazolamine is a centrally acting myorelaxant, which is formerly used as an antispasmodic and uricosuric.	C12=C(N=C(O1)N)C=C(C=C2)Cl	201	http://www.selleckchem.com/products/zoxazolamine.html
621	1901	L2000-24	g3	3	7	20170501	1	181	186		J1:6	A1:16, B:O7, B:O14, N1:6, O1:6	[1:20, 34:20:294, 27:20:287, 261:266, 281:286]	Mechlorethamine HCl	S4252	other	Others	Others	192.51	55-86-7	hydrochloride	Mechlorethamine is the prototype of alkylating agents, it works by binding to DNA, crosslinking two strands and preventing cell duplication.	ClCCN(C)CCCl.Cl	202	http://www.selleckchem.com/products/mechlorethamine-hcl.html
622	1902	L2000-24	g4	4	7	20170501	1	161	166		I1:6	A1:16, B:O7, B:O14, N1:6, O1:6	[1:20, 34:20:294, 27:20:287, 261:266, 281:286]	Efaproxiral Sodium	S4263	other	Others	Others	363.38	170787-99-2	sodium		C1(=CC(=CC(=C1)NC(CC2=CC=C(C=C2)OC(C([O-])=O)(C)C)=O)C)C.[Na+]	200	http://www.selleckchem.com/products/efaproxiral-sodium.html
623	1903	L2000-24	g5	5	7	20170501	1	141	146		H1:6	A1:16, B:O7, B:O14, N1:6, O1:6	[1:20, 34:20:294, 27:20:287, 261:266, 281:286]	T0901317	S7076	other	Others	Liver X Receptor	481.33	293754-55-9	free base	T0901317 is a potent and selective agonist for both LXR and FXR, with EC50 of ~50 nM and 5 μM, respectively.	C1=CC=CC(=C1)S(=O)(N(C2=CC=C(C=C2)C(C(F)(F)F)(O)C(F)(F)F)CC(F)(F)F)=O	199	http://www.selleckchem.com/products/t0901317.html
624	1904	L2000-24	g6	6	7	20170501	1	121	126		G1:6	A1:16, B:O7, B:O14, N1:6, O1:6	[1:20, 34:20:294, 27:20:287, 261:266, 281:286]	AdipoRon	S7365	other	Others	Others	428.52	924416-43-3	free base	AdipoRon is a novel, and orally bioavailable adiponectin receptor agonist with KD of 1.8 and 3.1 μM for AdipoR1 and AdipoR2, respectively.	C1=CC=CC(=C1)C(C2=CC=C(C=C2)OCC(=O)NC3CCN(CC3)CC4=CC=CC=C4)=O	233	http://www.selleckchem.com/products/AdipoRon.html
625	1905	L2000-24	g7	7	7	20170501	1	101	106		F1:6	A1:16, B:O7, B:O14, N1:6, O1:6	[1:20, 34:20:294, 27:20:287, 261:266, 281:286]	FH1(BRD-K4477)	S7450	other	Others	Others	282.34	5/3/2719	free base	FH1(BRD-K4477) is a small molecule, which promotes differentiation of iPS-derived hepatocytes.	CC(=O)NC1=CC=C(C=C1)CC2=CC=C(C=C2)NC(=O)C	198	http://www.selleckchem.com/products/fh1-brd-k4477.html
626	1906	L2000-24	g8	8	7	20170501	1	81	86		E1:6	A1:16, B:O7, B:O14, N1:6, O1:6	[1:20, 34:20:294, 27:20:287, 261:266, 281:286]	Ellagic acid	S1327	other		Topoisomerase	302.19	476-66-4		Ellagic acid has antiproliferative and antioxidant property.	C12OC(C3C4C1=C(C(OC(C(=C(C=3)O)O)=4)=O)C=C(C=2O)O)=O
627	1907	L2000-24	g9	9	7	20170501	1	61	66		D1:6	A1:16, B:O7, B:O14, N1:6, O1:6	[1:20, 34:20:294, 27:20:287, 261:266, 281:286]	Cefaclor (Ceclor)	S1499	other			367.81	53994-73-3		Cefaclor is a cephalosporin antibiotic.	[C@]12(N(C(=C(CS1)Cl)C(O)=O)C([C@H]2NC(=O)[C@@H](C3=CC=CC=C3)N)=O)[H]
628	1908	L2000-24	g10	10	7	20170501	1	41	46		C1:6	A1:16, B:O7, B:O14, N1:6, O1:6	[1:20, 34:20:294, 27:20:287, 261:266, 281:286]	Ibuprofen	S1638	other	Neuronal Signaling	COX	206.28	15687-27-1	free base	Ibuprofen (Dolgesic) is an anti-inflammatory inhibitor targeting COX-1 and COX-2 with IC50 of 13 μM and 370 μM, respectively.	C1=C(C=CC(=C1)C(C(O)=O)C)CC(C)C	198	http://www.selleckchem.com/products/Ibuprofen(Advil).html
629	1909	L2000-24	g11	11	7	20170501	1	21	26		B1:6	A1:16, B:O7, B:O14, N1:6, O1:6	[1:20, 34:20:294, 27:20:287, 261:266, 281:286]	Piroxicam	S1713	other	Neuronal Signaling	COX	331.35	36322-90-4	free base	Piroxicam (Feldene) is a non-selective COX inhibitor with an IC50 of 6 mM.	C1=CN=C(C=C1)NC(C2N(S(C3=C(C=2O)C=CC=C3)(=O)=O)C)=O	199	http://www.selleckchem.com/products/Piroxicam(Feldene).html
630	1910	L2000-24	h2	2	8	20170501	1	295	300		O15:20	A1:16, B:O7, B:O14, N1:6, O1:6	[1:20, 34:20:294, 27:20:287, 261:266, 281:286]	Phenazopyridine HCl	S4235	other	Others	Others	249.7	136-40-3	hydrochloride	Phenazopyridine HCl a local analgesic that has been used in urinary tract disorders.	C1(=CC=C(C=C1)/N=N/C2=C(N=C(C=C2)N)N).Cl	200	http://www.selleckchem.com/products/paromomycin-sulfate.html
631	1911	L2000-24	h3	3	8	20170501	1	275	280		M15:20	A1:16, B:O7, B:O14, N1:6, O1:6	[1:20, 34:20:294, 27:20:287, 261:266, 281:286]	Epinastine HCl	S4253	other	Others	Others	285.77	108929-04-0	hydrochloride	Epinastine is an antihistamine and mast cell stabilizer that is used in eye drops to treat allergic conjunctivitis.	N12(C(C3C(CC4C1=CC=CC=4)=CC=CC=3)CN=C2N).[H]Cl	199	http://www.selleckchem.com/products/epinastine-hcl.html
632	1912	L2000-24	h4	4	8	20170501	1	255	260		N15:20	A1:16, B:O7, B:O14, N1:6, O1:6	[1:20, 34:20:294, 27:20:287, 261:266, 281:286]	Etofibrate	S4264	other	Others	Others	363.79	31637-97-5	free base		C1=C(C=CC(=C1)OC(C(OCCOC(C2=CC=CN=C2)=O)=O)(C)C)Cl	200	http://www.selleckchem.com/products/etofibrate.html
633	1913	L2000-24	h5	5	8	20170501	1	235	240		L15:20	A1:16, B:O7, B:O14, N1:6, O1:6	[1:20, 34:20:294, 27:20:287, 261:266, 281:286]	Cilengitide	S7077	other	Others	Integrin	588.66	188968-51-6	free base	Cilengitide is a potent integrin inhibitor for αvβ3 receptor and αvβ5 receptor with IC50 of 4.1 nM and 79 nM, respectively; ~10-fold selectivity against gpIIbIIIa. Phase 2.	N1(C([C@H](NC([C@@H](NC(=O)CNC([C@@H](NC([C@@H]1C(C)C)=O)CCCNC(=N)N)=O)CC(=O)O)=O)CC2=CC=CC=C2)=O)C	10	http://www.selleckchem.com/products/cilengitide-emd-121974-nsc-707544.html
634	1914	L2000-24	h6	6	8	20170501	1	288	293		O8:13	A1:16, B:O7, B:O14, N1:6, O1:6	[1:20, 34:20:294, 27:20:287, 261:266, 281:286]	4EGI-1	S7369	other	Others	ELF4	451.28	315706-13-9	free base	4EGI-1 is a competitive eIF4E/eIF4G interaction inhibitor by binding to eIF4E with KD of 25 μM.	C1C(N=C(S1)NN=C(CC2=CC=CC=C2N(O)O)C(=O)O)C3=CC(=C(C=C3)Cl)Cl	199	http://www.selleckchem.com/products/4egi-1.html
635	1915	L2000-24	h7	7	8	20170501	1	268	273		N8:13	A1:16, B:O7, B:O14, N1:6, O1:6	[1:20, 34:20:294, 27:20:287, 261:266, 281:286]	FPH1 (BRD-6125)	S7451	other	Others	Others	388.82	708219-39-0	free base	FPH1 (BRD-6125) is a small molecule, which promotes expansion of iPS-derived hepatocytes.	CC1=C(C=C(C=C1)Cl)N(CC(=O)NC2=C(C=CC=C2F)F)S(=O)(=O)C	200	http://www.selleckchem.com/products/fph1-brd-6125.html
636	1916	L2000-24	h8	8	8	20170501	1	248	253		M8:13	A1:16, B:O7, B:O14, N1:6, O1:6	[1:20, 34:20:294, 27:20:287, 261:266, 281:286]	Etodolac	S1328	other	Neuronal Signaling	COX	287.35	41340-25-4	free base	Etodolac (Lodine) is a COX inhibitor with an IC50 of 53.5 nM.	C1=CC2=C(C(=C1)CC)NC3=C2CCO[C@]3(CC(=O)O)CC	201	http://www.selleckchem.com/products/Etodolac.html
637	1917	L2000-24	h9	9	8	20170501	1	228	233		L8:13	A1:16, B:O7, B:O14, N1:6, O1:6	[1:20, 34:20:294, 27:20:287, 261:266, 281:286]	Perindopril Erbumine (Aceon)	S1506	other		RAAS	441.6	107133-36-8		Perindopril Erbumine(Aceon) is the tert-butylamine salt of perindopril, the ethyl ester of a non-sulfhydryl angiotensin-converting enzyme (ACE) inhibitor.	CCCC(N[C@H](C(N1[C@@]2([C@](C[C@@H]1C(=O)O)(CCCC2)[H])[H])=O)C)C(OCC)=O.C(C)(N)(C)C
638	1918	L2000-24	h10	10	8	20170501	1	241	246		M1:6	A1:16, B:O7, B:O14, N1:6, O1:6	[1:20, 34:20:294, 27:20:287, 261:266, 281:286]	Methyldopa (Aldomet)	S1642	other			211.21	555-30-6		Methyldopa (Aldomet) is a DOPA decarboxylase competitive inhibitor with an ED50 of 21.8 mg/kg.	C1(=C(C=CC(=C1)C[C@@](C(O)=O)(N)C)O)O
639	1919	L2000-24	h11	11	8	20170501	1	221	226		L1:6	A1:16, B:O7, B:O14, N1:6, O1:6	[1:20, 34:20:294, 27:20:287, 261:266, 281:286]	Paliperidone (Invega)	S1724	other			426.48	144598-75-4		Paliperidone (Invega) is an atypical antipsychotic.	C1(=C(C(N2C(=N1)[C@@](CCC2)(O)[H])=O)CCN3CCC(CC3)C4C5=C(ON=4)C=C(C=C5)F)C
640	1920	L2000-25	a2	2	1	20170502	0	215	220		K15:20	A1:16, B:O7, B:O14, N1:6, O1:6	[1:20, 34:20:294, 27:20:287, 261:266, 281:286]	Levodopa (Sinemet)	S1726	other			197.19	59-92-7		Levodopa (Sinemet) is an amino acid precursor of dopamine with antiparkinsonian properties.	C1=C(C(=CC(=C1)C[C@H](N)C(=O)O)O)O
641	1921	L2000-25	a3	3	1	20170502	0	195	200		J15:20	A1:16, B:O7, B:O14, N1:6, O1:6	[1:20, 34:20:294, 27:20:287, 261:266, 281:286]	Clofibrate (Atromid-S)	S1820	other			242.7	637-07-0		Clofibrate (Atromid-S), a fibric acid derivative used in the treatment of hyperlipoproteinemia type III and severe hypertriglyceridemia.	C1=C(C=CC(=C1)OC(C(OCC)=O)(C)C)Cl
642	1922	L2000-25	a4	4	1	20170502	0	175	180		I15:20	A1:16, B:O7, B:O14, N1:6, O1:6	[1:20, 34:20:294, 27:20:287, 261:266, 281:286]	Adenine	S1981	other	Neuronal Signaling	DNA/RNA Synthesis	135.13	73-24-5		Adenine is a purine derivative and a nucleobase with a variety of roles in biochemistry.	C12=C(N=CN=C1N)NC=N2		http://www.selleckchem.com/products/tolfenamic-acid.html
643	1923	L2000-25	a5	5	1	20170502	0	155	160		H15:20	A1:16, B:O7, B:O14, N1:6, O1:6	[1:20, 34:20:294, 27:20:287, 261:266, 281:286]	Ciprofloxacin (Cipro)	S2027	other			331.34	85721-33-1		Ciprofloxacin is a fluoroquinolone antibiotic, shows broad and potent antibacterial activity, with MIC90 of 0.024-6 μM. Phase 4.	C1(=C(C=C2C(=C1)C(C(=CN2C3CC3)C(O)=O)=O)N4CCNCC4)F
644	1924	L2000-25	a6	6	1	20170502	0	135	140		G15:20	A1:16, B:O7, B:O14, N1:6, O1:6	[1:20, 34:20:294, 27:20:287, 261:266, 281:286]	Fosinopril sodium (Monopril)	S2095	other		RAAS	585.64	88889-14-9		Fosinopril sodium (Monopril) is the ester prodrug of an angiotensin-converting enzyme (ACE) inhibitor, used for the treatment of hypertension and some types of chronic heart failure.	C(P(O[C@@H](C(C)C)OC(CC)=O)(=O)CC(N1[C@@H](C[C@H](C1)C2CCCCC2)C([O-])=O)=O)CCCC3(=CC=CC=C3).[Na+]
645	1925	L2000-25	a7	7	1	20170502	0	115	120		F15:20	A1:16, B:O7, B:O14, N1:6, O1:6	[1:20, 34:20:294, 27:20:287, 261:266, 281:286]	Asaraldehyde	S2531	other		COX	196.2	4460-86-0	free base	Asaraldehyde is a natural COX-2 inhibitor, exhibiting 17-fold selectivity over COX-1.	C1(=C(C=C(C(=C1)C=O)OC)OC)OC	198
646	1926	L2000-25	a8	8	1	20170502	0	95	100		E15:20	A1:16, B:O7, B:O14, N1:6, O1:6	[1:20, 34:20:294, 27:20:287, 261:266, 281:286]	Acemetacin	S2602	other		COX	415.82	53164-05-9	free base	Acemetacin is a non-steroidal anti-inflammatory drug and a glycolic acid ester of indometacin that is a cyclooxygenase inhibitor.	CC1N(C2=C(C=1CC(OCC(O)=O)=O)C=C(C=C2)OC)C(=O)C3=CC=C(C=C3)Cl	10
647	1927	L2000-25	a9	9	1	20170502	0	75	80		D15:20	A1:16, B:O7, B:O14, N1:6, O1:6	[1:20, 34:20:294, 27:20:287, 261:266, 281:286]	Fenoprofen calcium hydrate	S3027	other	Neuronal Signaling		242.27	71720-56-4		Fenoprofen calcium hydrate (Nalfon) is a non-steroidal anti-inflammatory drug (NSAID).	C1(=CC=CC(=C1)C(C(O)=O)C)OC2(=CC=CC=C2).[R]		http://www.selleckchem.com/products/bufexamac.html
648	1928	L2000-25	a10	10	1	20170502	0	55	60		C15:20	A1:16, B:O7, B:O14, N1:6, O1:6	[1:20, 34:20:294, 27:20:287, 261:266, 281:286]	Amikacin hydrate	S3122	other			603.6	1257517-67-1		Amikacin is an aminoglycoside antibiotic used to treat different types of bacterial infections._x000D_	[C@@H]1([C@@H]([C@H](O[C@@]([C@H]1O)(O[C@@H]2[C@H](C[C@H]([C@@H]([C@@H]2O)OC3[C@@H]([C@H]([C@H]([C@H](O3)CO)O)N)O)NC([C@H](CCN)O)=O)N)[H])CN)O)O.[R].O
649	1929	L2000-25	a11	11	1	20170502	0	35	40		B15:20	A1:16, B:O7, B:O14, N1:6, O1:6	[1:20, 34:20:294, 27:20:287, 261:266, 281:286]	Ampiroxicam	S4011	other		COX	447.46	99464-64-9	free base	Ampiroxicam is a nonselective cyclooxygenase inhibitor uesd as anti-inflammatory drug.	C1(C2=C(S(N(C=1C(NC3C=CC=CN=3)=O)C)(=O)=O)C=CC=C2)OC(OC(OCC)=O)C	201
650	1930	L2000-25	b2	2	2	20170502	0	208	213		K8:13	A1:16, B:O7, B:O14, N1:6, O1:6	[1:20, 34:20:294, 27:20:287, 261:266, 281:286]	Esomeprazole magnesium (Nexium)	S1743	other		proton pump	713.12	161973-10-0		Esomeprazole magnesium is a proton pump inhibitor to reduce gastric acid secretion.	[Mg+2].C1(=C(C(=C(N=C1)CS(C2=NC3=C([N-]2)C=CC(=C3)OC)=O)C)OC)C.C4(=C(C(=C(N=C4)CS(C5=NC6=C([N-]5)C=CC(=C6)OC)=O)C)OC)C
651	1931	L2000-25	b3	3	2	20170502	0	188	193		J8:13	A1:16, B:O7, B:O14, N1:6, O1:6	[1:20, 34:20:294, 27:20:287, 261:266, 281:286]	Betaxolol hydrochloride (Betoptic)	S1827	other		Adrenergic Receptor	343.89	63659-19-8		Betaxolol is a β1 adrenergic receptor blocker with IC50 of 6 μM.	C1(=CC(=CC=C1CCOCC2CC2)OCC(CNC(C)C)O).Cl
652	1932	L2000-25	b4	4	2	20170502	0	168	173		I8:13	A1:16, B:O7, B:O14, N1:6, O1:6	[1:20, 34:20:294, 27:20:287, 261:266, 281:286]	Adenine sulfate	S1982	other		DNA/RNA Synthesis	368.33	321-30-2		Adenine sulfate is a sulfate salt form of adenine which is a purine derivative and a nucleobase with a variety of roles in biochemistry.	S(=O)(=O)(O)O.C12(=C(C(=NC=N1)N)NC=N2).C34=C(C(=NC=N3)N)NC=N4
653	1933	L2000-25	b5	5	2	20170502	0	148	153		H8:13	A1:16, B:O7, B:O14, N1:6, O1:6	[1:20, 34:20:294, 27:20:287, 261:266, 281:286]	Nimesulide	S2040	other		COX	308.31	51803-78-2	free base	Nimesulide is a relatively COX-2 selective inhibitor with IC50 of 26 μM.	C1=CC(=CC(=C1NS(=O)(=O)C)OC2=CC=CC=C2)[N+](=O)[O-]	201
654	1934	L2000-25	b6	6	2	20170502	0	128	133		G8:13	A1:16, B:O7, B:O14, N1:6, O1:6	[1:20, 34:20:294, 27:20:287, 261:266, 281:286]	Flunixin Meglumin	S2108	other		COX	491.46	42461-84-7	meglumine	Flunixin meglumine is a potent inhibitor of the enzyme cyclooxygenase used as analgesic agent with anti-inflammatory and antipyretic activity.	C1(C(=CC=CN=1)C(=O)O)NC2(C(=C(C=CC=2)C(F)(F)F)C).N(C[C@H](O)[C@@H](O)[C@H](O)[C@H](O)CO)C	199
655	1935	L2000-25	b7	7	2	20170502	0	108	113		F8:13	A1:16, B:O7, B:O14, N1:6, O1:6	[1:20, 34:20:294, 27:20:287, 261:266, 281:286]	Riboflavin (Vitamin B2)	S2540	other	Neuronal Signaling		376.36	83-88-5		Riboflavin (vitamin B2) is an easily absorbed micronutrient with a key role in maintaining health in humans and other animals.	C1(=C(C=C2C(=C1)N=C3C(N2C[C@@H]([C@@H]([C@@H](CO)O)O)O)=NC(NC3=O)=O)C)C		http://www.selleckchem.com/products/Asaraldehyde-Asaronaldehyde.html
656	1936	L2000-25	b8	8	2	20170502	0	88	93		E8:13	A1:16, B:O7, B:O14, N1:6, O1:6	[1:20, 34:20:294, 27:20:287, 261:266, 281:286]	Ethisterone	S2611	other	Neuronal Signaling	Estrogen/progestogen Receptor	312.45	434-03-7		Ethisterone is a progestogen hormone being considered to treat prostate cancer.	C1C(C=C2[C@](C1)([C@]3([C@@](CC2)([C@]4([C@](CC3)([C@@](CC4)(O)C#C)C)[H])[H])[H])C)=O		http://www.selleckchem.com/products/acemetacin-emflex.html
657	1937	L2000-25	b9	9	2	20170502	0	68	73		D8:13	A1:16, B:O7, B:O14, N1:6, O1:6	[1:20, 34:20:294, 27:20:287, 261:266, 281:286]	Niclosamide (Niclocide)	S3030	other		STAT	327.12	50-65-7		Niclosamide can inhibit DNA replication and inhibit STAT with IC50 of 0.7 μM.	C(C1C(=CC=C(C=1)Cl)O)(=O)NC2C(=CC(=CC=2)[N+](=O)[O-])Cl
658	1938	L2000-25	b10	10	2	20170502	0	48	53		C8:13	A1:16, B:O7, B:O14, N1:6, O1:6	[1:20, 34:20:294, 27:20:287, 261:266, 281:286]	Ibandronate sodium	S3148	other			360.23	138926-19-9		Ibandronate is a highly potent nitrogen-containing bisphosphonate used for the treatment of osteoporosis.	C(CCN(CCCCC)C)(O)(P(=O)(O)O)P(=O)(O)O.[Na].O
659	1939	L2000-25	b11	11	2	20170502	0	28	33		B8:13	A1:16, B:O7, B:O14, N1:6, O1:6	[1:20, 34:20:294, 27:20:287, 261:266, 281:286]	Sodium Monofluorophosphate	S4013	other	Neuronal Signaling		143.95	10163-15-2		Monofluorophosphate is a competitive inhibitor of pyruvate kinase and alkaline phosphatase with Ki of 3.4 mM and 69 μM, respectively, which also irreversibly inhibits phosphorylase phosphatase with Ki of 0.5 mM.	P(=O)(F)([O-])[O-].[Na+].[Na+]		http://www.selleckchem.com/products/ampiroxicam.html
660	1940	L2000-25	c2	2	3	20170502	0	201	206		K1:6	A1:16, B:O7, B:O14, N1:6, O1:6	[1:20, 34:20:294, 27:20:287, 261:266, 281:286]	L-Glutamine	S1749	other			146.14	56-85-9		L-Glutamine is one of the 20 amino acids encoded by the standard genetic code.	NC(CC[C@@H](C(O)=O)N)=O
661	1941	L2000-25	c3	3	3	20170502	0	181	186		J1:6	A1:16, B:O7, B:O14, N1:6, O1:6	[1:20, 34:20:294, 27:20:287, 261:266, 281:286]	Penicillamine (Cuprimine)	S1853	other			149.21	52-67-5		Penicillamine(Cuprimine, Depen) is used as an antirheumatic and as a chelating agent in Wilson’s disease.	SC([C@H](C(O)=O)N)(C)C
662	1942	L2000-25	c4	4	3	20170502	0	161	166		I1:6	A1:16, B:O7, B:O14, N1:6, O1:6	[1:20, 34:20:294, 27:20:287, 261:266, 281:286]	ATP (Adenosine-Triphosphate)	S1985	other			551.14	987-65-5		ATP is a disodium salt form of adenosine-triphosphate which is a multifunctional nucleoside triphosphate.	O1([C@H]([C@@H]([C@@H]([C@@H]1COP(OP(OP(O)([O-])=O)(=O)[O-])(=O)O)O)O)N2C=NC3=C2N=CN=C3N).[Na+].[Na+]
663	1943	L2000-25	c5	5	3	20170502	0	141	146		H1:6	A1:16, B:O7, B:O14, N1:6, O1:6	[1:20, 34:20:294, 27:20:287, 261:266, 281:286]	Lornoxicam	S2047	other	Neuronal Signaling	COX	371.82	70374-39-9	free base	Lornoxicam is a COX-1 and COX-2 inhibitor with IC50 of 5 nM and 8 nM, respectively.	N(C1=NC=CC=C1)C(C2N(S(C3=C(C=2O)SC(=C3)Cl)(=O)=O)C)=O	10	http://www.selleckchem.com/products/nimesulide.html
664	1944	L2000-25	c6	6	3	20170502	0	121	126		G1:6	A1:16, B:O7, B:O14, N1:6, O1:6	[1:20, 34:20:294, 27:20:287, 261:266, 281:286]	Licofelone	S2121	other	Neuronal Signaling	COX	379.88	156897-06-2	free base	Licofelone is a dual COX/LOX inhibitor being considered as a treatment for osteoarthritis.	C1(C2=CC=C(C=C2)Cl)C(=C3N(C=1CC(=O)O)CC(C3)(C)C)C4=CC=CC=C4	200	http://www.selleckchem.com/products/flunixin-meglumin.html
665	1945	L2000-25	c7	7	3	20170502	0	101	106		F1:6	A1:16, B:O7, B:O14, N1:6, O1:6	[1:20, 34:20:294, 27:20:287, 261:266, 281:286]	Cefprozil hydrate (Cefzil)	S2544	other			407.44	121123-17-9		Cefprozil hydrate (Cefzil) is a second-generation cephalosporin type antibiotic.	[C@@H]12(N(C(=C(CS1)/C=C/C)C(=O)O)C([C@H]2NC([C@@H](C3=CC=C(C=C3)O)N)=O)=O).O
666	1946	L2000-25	c8	8	3	20170502	0	81	86		E1:6	A1:16, B:O7, B:O14, N1:6, O1:6	[1:20, 34:20:294, 27:20:287, 261:266, 281:286]	Peramivir Trihydrate	S2716	other			382.45	1041434-82-5		Peramivir Trihydrate is a trihydrate of the anti-infection agent peramivir (RWJ-270201,BCX-1812) which is a transition-state analogue and a potent, specific influenza viral neuraminidase inhibitor with an IC50 of median 0.09 nM.	C(N)(=N)N[C@]1([C@]([C@]([C@](C1)(C(=O)O)[H])([H])O)([H])[C@](C(CC)CC)(NC(C)=O)[H])[H].O.O.O
667	1947	L2000-25	c9	9	3	20170502	0	61	66		D1:6	A1:16, B:O7, B:O14, N1:6, O1:6	[1:20, 34:20:294, 27:20:287, 261:266, 281:286]	Droxidopa (L-DOPS)	S3041	other			213.19	23651-95-8		Droxidopa (L-DOPS) is a psychoactive drug and acts as a prodrug to the neurotransmitters norepinephrine (noradrenaline) and epinephrine (adrenaline).	C1(=C(C=CC(=C1)[C@@H](O)[C@H](N)C(=O)O)O)O
668	1948	L2000-25	c10	10	3	20170502	0	41	46		C1:6	A1:16, B:O7, B:O14, N1:6, O1:6	[1:20, 34:20:294, 27:20:287, 261:266, 281:286]	Naftifine HCl	S3156	other			323.86	65473-14-5		Naftifine is an allylamine antifungal drug for the topical treatment of tinea pedis, tinea cruris, and tinea corporis, probably involves selectively blocking sterol biosynthesis via inhibition of the squalene 2,3-epoxidase enzyme.	C1(C=CC=C2C=CC=CC=12)CN(C/C=C/C3C=CC=CC=3)C.Cl
669	1949	L2000-25	c11	11	3	20170502	0	21	26		B1:6	A1:16, B:O7, B:O14, N1:6, O1:6	[1:20, 34:20:294, 27:20:287, 261:266, 281:286]	Colistin Sulfate	S4029	other			2801.26	1264-72-8		Colistin is a cyclic cationic decapeptide linked to a fatty acid side chain, it belongs to a group of similarly structured bacterial antimicrobial peptides.	C1([C@@H](NC([C@@H](NC([C@H](NC(=O)[C@H](NC(=O)[C@@H](NC(=O)[C@H](CCNC([C@H]([C@@H](C)O)N1)=O)NC([C@H](CCN)NC([C@H]([C@@H](C)O)NC([C@@H](NC(=O)CCCC(C)CC)CCN)=O)=O)=O)CCN)CC(C)C)CC(C)C)=O)CCN)=O)CCN)=O.S(=O)(=O)(O)O.S(=O)(=O)(O)O.S(=O)(=O)(O)O.S(=O)(=O)(O)O.S(=O)(=O)(O)O.C2([C@@H](NC([C@@H](NC([C@H](NC(=O)[C@H](NC(=O)[C@@H](NC(=O)[C@H](CCNC([C@H]([C@@H](C)O)N2)=O)NC([C@H](CCN)NC([C@H]([C@@H](C)O)N…
670	1950	L2000-25	d2	2	4	20170502	0	295	300		O15:20	A1:16, B:O7, B:O14, N1:6, O1:6	[1:20, 34:20:294, 27:20:287, 261:266, 281:286]	Oxybutynin (Ditropan)	S1754	other			357.49	5633-20-5		Oxybutynin (Ditropan) is an anticholinergic medication used to relieve urinary and bladder difficulties.	C1(=CC=CC=C1)C(C2CCCCC2)(C(=O)OCC#CCN(CC)CC)O
671	1951	L2000-25	d3	3	4	20170502	0	275	280		M15:20	A1:16, B:O7, B:O14, N1:6, O1:6	[1:20, 34:20:294, 27:20:287, 261:266, 281:286]	Etidronate (Didronel)	S1857	other			206.03	2809-21-4		Etidronate (Didronel) is a human protein tyrosine phosphatase inhibitor with IC50 of 0.2 μM.	C(C)(P(=O)(O)O)(P(=O)(O)O)O
672	1952	L2000-25	d4	4	4	20170502	0	255	260		N15:20	A1:16, B:O7, B:O14, N1:6, O1:6	[1:20, 34:20:294, 27:20:287, 261:266, 281:286]	Liranaftate	S1997	other			328.43	88678-31-3		Liranaftate is a squalene epoxidase inhibitor with anti-fungicidal activities.	C12=C(C=CC(=C1)OC(N(C3=CC=CC(=N3)OC)C)=S)CCCC2
673	1953	L2000-25	d5	5	4	20170502	0	235	240		L15:20	A1:16, B:O7, B:O14, N1:6, O1:6	[1:20, 34:20:294, 27:20:287, 261:266, 281:286]	Clindamycin phosphate	S2048	other	Neuronal Signaling		504.96	24729-96-2		Clindamycin phosphate is a lincosamide antibiotic for Plasmodium falciparum with IC50 of 12 nM.	[C@H]1([C@H]([C@H]([C@H](O[C@H]1SC)[C@H]([C@H](C)Cl)NC(=O)[C@H]2N(C[C@@H](C2)CCC)C)O)O)OP(O)(O)=O		http://www.selleckchem.com/products/lornoxicam-xefo.html
674	1954	L2000-25	d6	6	4	20170502	0	288	293		O8:13	A1:16, B:O7, B:O14, N1:6, O1:6	[1:20, 34:20:294, 27:20:287, 261:266, 281:286]	Fudosteine	S2129	other	Neuronal Signaling		179.24	13189-98-5		Fudosteine is a novel mucoactive agent and a MUC5AC mucin hypersecretion inhibitor.	[C@@H](C(=O)O)(CSCCCO)N		http://www.selleckchem.com/products/licofelone.html
675	1955	L2000-25	d7	7	4	20170502	0	268	273		N8:13	A1:16, B:O7, B:O14, N1:6, O1:6	[1:20, 34:20:294, 27:20:287, 261:266, 281:286]	Oxacillin sodium monohydrate	S2563	other			441.43	7240-38-2		Oxacillin sodium monohydrate is an antibacterial agent and is a narrow spectrum beta-lactam antibiotic of the penicillin class.	O1(C(=C(C(=N1)C2=CC=CC=C2)C(N[C@H]3[C@@]4(N(C3=O)[C@@H](C(S4)(C)C)C(=O)[O-])[H])=O)C).[Na+].O
676	1956	L2000-25	d8	8	4	20170502	0	248	253		M8:13	A1:16, B:O7, B:O14, N1:6, O1:6	[1:20, 34:20:294, 27:20:287, 261:266, 281:286]	ML130 (Nodinitib-1)	S2863	other		NOD1	287.34	799264-47-4	free base	ML130 is a potent and selective inhibitor of NOD1 with IC50 of 0.56 μM, inhibits NF-κB activation, exhibits 36-fold selectivity over NOD2.	C1=CC=C2C(=C1)N(C(=N2)N)S(=O)(C3=CC=C(C=C3)C)=O	198
677	1957	L2000-25	d9	9	4	20170502	0	228	233		L8:13	A1:16, B:O7, B:O14, N1:6, O1:6	[1:20, 34:20:294, 27:20:287, 261:266, 281:286]	Rofecoxib	S3043	other		COX	314.36	162011-90-7	free base	Rofecoxib is a COX-2 inhibitor with IC50 of 18 nM.	C1=C(C=CC(=C1)C2=C(C(OC2)=O)C3=CC=CC=C3)S(C)(=O)=O	200
678	1958	L2000-25	d10	10	4	20170502	0	241	246		M1:6	A1:16, B:O7, B:O14, N1:6, O1:6	[1:20, 34:20:294, 27:20:287, 261:266, 281:286]	Abacavir sulfate	S3165	other		Reverse Transcriptase	335.35	188062-50-2		Abacavir is a commonly used nucleoside analogue with potent antiviral activity against HIV-1.	[C@H]1(C=C[C@@H](C1)N2C=NC3C(=NC(=NC2=3)N)NC4CC4)CO.S(=O)(=O)(O)O.[C@H]5(C=C[C@@H](C5)N6C=NC7C(=NC(=NC6=7)N)NC8CC8)CO
679	1959	L2000-25	d11	11	4	20170502	0	221	226		L1:6	A1:16, B:O7, B:O14, N1:6, O1:6	[1:20, 34:20:294, 27:20:287, 261:266, 281:286]	Bismuth Subsalicylate	S4032	other			362.09	14882-18-9		Bismuth Subsalicylate is the active ingredient in Pepto-Bismol and inhibits prostaglandin G/H Synthase 1/2.	C1(=CC=C(C(=C1)C([O-])=O)[O-]).[Bi+3].[OH-]
680	1960	L2000-25	e2	2	5	20170502	1	215	220		K15:20	A1:16, B:O7, B:O14, N1:6, O1:6	[1:20, 34:20:294, 27:20:287, 261:266, 281:286]	Thioguanine	S1774	other			167.19	154-42-7		The thiopurine drugs are purine antimetabolites widely used in the treatment of acute lymphoblastic leukemia, autoimmune disorders (e.g., Crohn's disease, rheumatoid arthritis) and organ transplant recipients.	N1=C(NC2=C(C1=S)NC=N2)N
681	1961	L2000-25	e3	3	5	20170502	1	195	200		J15:20	A1:16, B:O7, B:O14, N1:6, O1:6	[1:20, 34:20:294, 27:20:287, 261:266, 281:286]	Risedronic acid (Actonel)	S1874	other			283.11	105462-24-6		Risedronic acid (Actonel) is a bisphosphonate used to strengthen bone, treat or prevent osteoporosis, and treat Paget's disease of bone.	N1=CC=CC(=C1)CC(P(O)(=O)O)(O)P(=O)(O)O
682	1962	L2000-25	e4	4	5	20170502	1	175	180		I15:20	A1:16, B:O7, B:O14, N1:6, O1:6	[1:20, 34:20:294, 27:20:287, 261:266, 281:286]	D-Cycloserine	S1998	other			102.09	68-41-7		D-Cycloserine is an analog of the amino acid D-alanine.	O=C1NOC[C@@H]1N
683	1963	L2000-25	e5	5	5	20170502	1	155	160		H15:20	A1:16, B:O7, B:O14, N1:6, O1:6	[1:20, 34:20:294, 27:20:287, 261:266, 281:286]	Oxytetracycline dihydrate	S2052	other			496.46	6153-64-6		Oxytetracycline Dihydrate is a prescription antibiotic, iinterfering with the ability of bacteria to produce essential proteins.	C1(=CC(=C2C(=C1)[C@@]([C@@]3(C(=C([C@]4([C@@]([C@@H]3O)([C@H](C(=C(C4=O)C(N)=O)O)N(C)C)[H])O)O)C2=O)[H])(O)C)O).O.O
684	1964	L2000-25	e6	6	5	20170502	1	135	140		G15:20	A1:16, B:O7, B:O14, N1:6, O1:6	[1:20, 34:20:294, 27:20:287, 261:266, 281:286]	Fleroxacin (Quinodis)	S2469	other			369.34	79660-72-3		Fleroxacin (Quinodis) is a new broad-spectrum fluoroquinolone.	C1(=CN(C2=C(C1=O)C=C(C(=C2F)N3CCN(CC3)C)F)CCF)C(=O)O
685	1965	L2000-25	e7	7	5	20170502	1	115	120		F15:20	A1:16, B:O7, B:O14, N1:6, O1:6	[1:20, 34:20:294, 27:20:287, 261:266, 281:286]	Neomycin sulfate	S2568	other			712.72	1405-10-3		Neomycin sulphate belongs to a class of antibiotics known as the aminoglycosides.	[C@@H]1([C@@H]([C@H]([C@H](O[C@H]1CN)O[C@@H]2[C@H](C[C@H]([C@@H]([C@@H]2OC3O[C@@H]([C@H]([C@@H]3O)O[C@H]4O[C@H]([C@H]([C@@H]([C@@H]4N)O)O)CN)CO)O)N)N)N)O)O.S(=O)(=O)(O)O
686	1966	L2000-25	e8	8	5	20170502	1	95	100		E15:20	A1:16, B:O7, B:O14, N1:6, O1:6	[1:20, 34:20:294, 27:20:287, 261:266, 281:286]	Lumiracoxib	S2903	other	NF-κB	COX	293.72	220991-20-8	free base	Lumiracoxib is a novel, selective COX-2 inhibitor with IC50 and Ki of 0.14 μM and 0.06 μM, exhibits 515-fold selectivity over COX-1. Phase 4.	C1=CC=C(C(=C1Cl)NC2=CC=C(C=C2CC(O)=O)C)F	200	http://www.selleckchem.com/products/ml130.html
687	1967	L2000-25	e9	9	5	20170502	1	75	80		D15:20	A1:16, B:O7, B:O14, N1:6, O1:6	[1:20, 34:20:294, 27:20:287, 261:266, 281:286]	Besifloxacin HCl (Besivance)	S3055	other	Neuronal Signaling		430.3	405165-61-9		Besifloxacin HCl is a fourth-generation fluoroquinolone antibiotic.	C12(=C(C(C(=CN1C3CC3)C(=O)O)=O)C=C(C(=C2Cl)N4CCCC[C@](C4)(N)[H])F).Cl		http://www.selleckchem.com/products/rofecoxib-vioxx.html
688	1968	L2000-25	e10	10	5	20170502	1	55	60		C15:20	A1:16, B:O7, B:O14, N1:6, O1:6	[1:20, 34:20:294, 27:20:287, 261:266, 281:286]	L-Arginine HCl	S3174	other			210.66	1119-34-2		L-Arginine is the nitrogen donor for synthesis of nitric oxide, a potent vasodilator that is deficient during times of sickle cell crisis.	C([C@H](N)CCCNC(=N)N)(=O)O.Cl
689	1969	L2000-25	e11	11	5	20170502	1	35	40		B15:20	A1:16, B:O7, B:O14, N1:6, O1:6	[1:20, 34:20:294, 27:20:287, 261:266, 281:286]	Valdecoxib	S4049	other		COX	314.36	181695-72-7	free base	Valdecoxib is a potent and selective inhibitor of COX-2 with IC50 of 5 nM.	C1=CC=CC(=C1)C2=NOC(=C2C3=CC=C(C=C3)S(N)(=O)=O)C	200
690	1970	L2000-25	f2	2	6	20170502	1	208	213		K8:13	A1:16, B:O7, B:O14, N1:6, O1:6	[1:20, 34:20:294, 27:20:287, 261:266, 281:286]	Verteporfin (Visudyne)	S1786	other			718.79	129497-78-5		Verteporfin(Visudyne), a benzoporphyrin derivative, is a medication used as a photosensitizer for photodynamic therapy.	C12NC(C=C3N=C(C=C4NC(=CC5=NC(=C1)C6[C@]5([C@@H](C(=CC=6)C(=O)OC)C(OC)=O)C)C(=C4CCC(OC)=O)C)C(=C3C)CCC(O)=O)=C(C=2C)C=C
691	1971	L2000-25	f3	3	6	20170502	1	188	193		J8:13	A1:16, B:O7, B:O14, N1:6, O1:6	[1:20, 34:20:294, 27:20:287, 261:266, 281:286]	Diclofenac Sodium	S1903	other	Neuronal Signaling	COX	318.13	15307-79-6	sodium	Diclofenac Sodium is a non-selective COX inhibitor with IC50 of 60 and 220 nM for ovine COX-1 and -2, respectively.	C1(=C(C(=C(C=C1)Cl)NC2=C(CC([O-])=O)C=CC=C2)Cl).[Na+]	201	http://www.selleckchem.com/products/Diclofenac-sodium.html
692	1972	L2000-25	f4	4	6	20170502	1	168	173		I8:13	A1:16, B:O7, B:O14, N1:6, O1:6	[1:20, 34:20:294, 27:20:287, 261:266, 281:286]	Sodium orthovanadate	S2000	other		ATPase	183.91	13721-39-6		Sodium orthovanadate is the chemical compound Na3VO4 and contains the tetrahedral VO43. It is an inhibitor of protein tyrosine phosphatases, alkaline phosphatases and a number of ATPases, most likely acting as a phosphate analogue.	O([V](O[Na])(=O)O[Na])[Na]
693	1973	L2000-25	f5	5	6	20170502	1	148	153		H8:13	A1:16, B:O7, B:O14, N1:6, O1:6	[1:20, 34:20:294, 27:20:287, 261:266, 281:286]	Mitiglinide calcium	S2073	other		Potassium Channel	668.88	145525-41-3		Mitiglinide is a blood glucose-lowering drugs, stimulating insulin secretion by closing the ATP-sensitive K+ channels in pancreatic beta-cells.	[C@@H](C([O-])=O)(CC(N1C[C@@]2([C@](C1)(CCCC2)[H])[H])=O)CC3(=CC=CC=C3).[C@@H](C([O-])=O)(CC(N4C[C@@]5([C@](C4)(CCCC5)[H])[H])=O)CC6(=CC=CC=C6).[Ca+2]
694	1974	L2000-25	f6	6	6	20170502	1	128	133		G8:13	A1:16, B:O7, B:O14, N1:6, O1:6	[1:20, 34:20:294, 27:20:287, 261:266, 281:286]	Sulfadoxine (Sulphadoxine)	S2511	other			310.33378	2447-57-6		Sulfadoxine(Sulphadoxine) is an ultra-long-lasting sulfonamide with an IC50 of 249 μg/ml for P. vivax	C1=C(C=CC(=C1)S(NC2=NC=NC(=C2OC)OC)(=O)=O)N
695	1975	L2000-25	f7	7	6	20170502	1	108	113		F8:13	A1:16, B:O7, B:O14, N1:6, O1:6	[1:20, 34:20:294, 27:20:287, 261:266, 281:286]	Prednisolone acetate (Omnipred)	S2570	other			402.48	52-21-1		Prednisolone Acetate is a synthetic corticosteroid drug that is particularly effective as an immunosuppressant agent.	C1C(C=C2[C@](C=1)([C@]3([C@@](CC2)([C@]4([C@](C[C@H]3O)([C@@](CC4)(C(COC(=O)C)=O)O)C)[H])[H])[H])C)=O
696	1976	L2000-25	f8	8	6	20170502	1	88	93		E8:13	A1:16, B:O7, B:O14, N1:6, O1:6	[1:20, 34:20:294, 27:20:287, 261:266, 281:286]	Hygromycin B	S2908	other	Neuronal Signaling		527.52	31282-04-9		Hygromycin B, a selective antibiotic that is effective on most bacteria, fungi and higher eukaryotes, inhibits protein synthesis by interfering with translocation and causing mistranslation at the 70S ribosome.	C1[C@H]([C@@H]([C@]([C@@H]([C@@H]1NC)O)(O[C@@H]2O[C@@H]([C@@H]([C@]3([C@]2(OC4(O3)O[C@@]([C@@H]([C@@H]([C@@H]4O)O)O)([C@H](CO)N)[H])[H])[H])O)CO)[H])O)N		http://www.selleckchem.com/products/lumiracoxib-cox-189.html
697	1977	L2000-25	f9	9	6	20170502	1	68	73		D8:13	A1:16, B:O7, B:O14, N1:6, O1:6	[1:20, 34:20:294, 27:20:287, 261:266, 281:286]	Danofloxacin Mesylate	S3058	other			453.48	119478-55-6		Danofloxacin is a fluoroquinolone antibacterial for veterinary use, with MIC90 of 0.28 μM.	C12(N(C3CC3)C=C(C(C=1C=C(C(=C2)N4[C@]5(C[C@@](C4)(N(C5)C)[H])[H])F)=O)C(O)=O).S(C)(O)(=O)=O
698	1978	L2000-25	f10	10	6	20170502	1	48	53		C8:13	A1:16, B:O7, B:O14, N1:6, O1:6	[1:20, 34:20:294, 27:20:287, 261:266, 281:286]	Triflusal	S3200	other		COX	248.16	322-79-2	free base	Triflusal irreversibly inhibits the production of thromboxane-B2 in platelets by acetylating cycloxygenase-1.	C(C1C(=CC(=CC=1)C(F)(F)F)OC(=O)C)(=O)O	201
699	1979	L2000-25	f11	11	6	20170502	1	28	33		B8:13	A1:16, B:O7, B:O14, N1:6, O1:6	[1:20, 34:20:294, 27:20:287, 261:266, 281:286]	Nabumetone	S4051	other	Neuronal Signaling	COX	228.29	42924-53-8	free base	Nabumetone is a non-steroidal anti-inflammatory drug and its active metabolite inhibits the COX.	C1(=CC=C2C(=C1)C=CC(=C2)CCC(C)=O)OC	201	http://www.selleckchem.com/products/valdecoxib.html
700	1980	L2000-25	g2	2	7	20170502	1	201	206		K1:6	A1:16, B:O7, B:O14, N1:6, O1:6	[1:20, 34:20:294, 27:20:287, 261:266, 281:286]	Bacitracin zinc	S1791	other			1486.07	1405-89-6		Bacitracin zinc is a dephosphorylation of the C55-isoprenyl pyrophosphate interference for inhibition of cleavage of Tyr from Met-enkephalin with IC50 of 10 μM.	C1(C(=O)N[C@H](C(N[C@@H](C(N[C@H](C(N[C@@H]2C(N[C@@H](C(=O)N[C@H](C(N[C@H](C(N[C@H](C(N[C@@H](C(N[C@H](C(NCCCC2)=O)CC(=O)N)=O)CC([O-])=O)=O)CC3N=CNC=3)=O)CC4=CC=CC=C4)=O)[C@@H](CC)C)CCCN)=O)=O)[C@@H](CC)C)=O)CCC(=O)[O-])=O)CC(C)C)(SC(=NC1)[C@@H](N)[C@@H](C)CC).[Zn+2]
701	1981	L2000-25	g3	3	7	20170502	1	181	186		J1:6	A1:16, B:O7, B:O14, N1:6, O1:6	[1:20, 34:20:294, 27:20:287, 261:266, 281:286]	Disodium Cromoglycate	S1911	other			512.33	15826-37-6		Disodium Cromoglycate is an antiallergic drug with IC50 of 39 μg/mL.	C1(=C2C(=C(C=C1)OCC(O)COC3=CC=CC4=C3C(C=C(O4)C(=O)[O-])=O)C(C=C(O2)C(=O)[O-])=O).[Na+].[Na+]
702	1982	L2000-25	g4	4	7	20170502	1	161	166		I1:6	A1:16, B:O7, B:O14, N1:6, O1:6	[1:20, 34:20:294, 27:20:287, 261:266, 281:286]	Taurine	S2008	other			125.15	107-35-7		Taurine, or 2-aminoethanesulfonic acid, is an organic acid.	C(CN)S(O)(=O)=O
703	1983	L2000-25	g5	5	7	20170502	1	141	146		H1:6	A1:16, B:O7, B:O14, N1:6, O1:6	[1:20, 34:20:294, 27:20:287, 261:266, 281:286]	Lisinopril (Zestril)	S2076	other		RAAS	405.49	83915-83-7		Lisinopril is angiotensin-converting enzyme inhibitor, used in treatment of hypertension, congestive heart failure, and heart attacks, and also in preventing renal and retinal complications of diabetes.	C1=CC=CC(=C1)CC[C@H](N[C@H](C(N2[C@@H](CCC2)C(=O)O)=O)CCCCN)C(O)=O
704	1984	L2000-25	g6	6	7	20170502	1	121	126		G1:6	A1:16, B:O7, B:O14, N1:6, O1:6	[1:20, 34:20:294, 27:20:287, 261:266, 281:286]	Tobramycin	S2514	other			467.52369	32986-56-4		Tobramycin is an aminoglycoside antibiotic with an IC50 of 9.7 μM	C1[C@@H]([C@H](O[C@@]([C@H]1N)(O[C@@H]2[C@H](C[C@H]([C@@H]([C@@H]2O)O[C@]3(O[C@@H]([C@H]([C@@H]([C@@H]3O)N)O)CO)[H])N)N)[H])CN)O
705	1985	L2000-25	g7	7	7	20170502	1	101	106		F1:6	A1:16, B:O7, B:O14, N1:6, O1:6	[1:20, 34:20:294, 27:20:287, 261:266, 281:286]	Phenacetin	S2577	other		COX	179.22	62-44-2	free base	Phenacetin is a non-opioid analgesic without anti-inflammatory properties.	C1=C(C=CC(=C1)NC(C)=O)OCC	200
706	1986	L2000-25	g8	8	7	20170502	1	81	86		E1:6	A1:16, B:O7, B:O14, N1:6, O1:6	[1:20, 34:20:294, 27:20:287, 261:266, 281:286]	Zaltoprofen	S3008	other		COX	298.36	74711-43-6	free base	Zaltoprofen is an inhibitor of Cox-1 and Cox-2 for treatment of arthritis.	C1=CC=C2C(=C1)C(CC3=C(S2)C=CC(=C3)C(C)C(=O)O)=O	201
707	1987	L2000-25	g9	9	7	20170502	1	61	66		D1:6	A1:16, B:O7, B:O14, N1:6, O1:6	[1:20, 34:20:294, 27:20:287, 261:266, 281:286]	Amikacin sulfate	S3065	other			781.76	39831-55-5		Amikacin sulfate binds to 16S rRNA (bacterial 30S ribosome), causing misreading of mRNA and supressing proteins synthesis.	[C@@H]1([C@@H](C[C@@H]([C@@H]([C@@H]1O)O[C@H]2O[C@@H]([C@H]([C@H]([C@H]2O)O)O)CN)N)NC([C@H](CCN)O)=O)O[C@H]3(O[C@@H]([C@H]([C@H]([C@H]3O)N)O)CO).OS(=O)(=O)O.OS(=O)(=O)O
708	1988	L2000-25	g10	10	7	20170502	1	41	46		C1:6	A1:16, B:O7, B:O14, N1:6, O1:6	[1:20, 34:20:294, 27:20:287, 261:266, 281:286]	Thiamine HCl (Vitamin B1)	S3211	other	Neuronal Signaling		337.27	67-03-8		Thiamine or vitamin B1 is a water-soluble vitamin of the B complex, its phosphate derivatives are involved in many cellular processes.	S1(C=[N+](C(=C1CCO)C)CC2C(=NC(=NC=2)C)N).[Cl-].Cl		http://www.selleckchem.com/products/triflusal.html
709	1989	L2000-25	g11	11	7	20170502	1	21	26		B1:6	A1:16, B:O7, B:O14, N1:6, O1:6	[1:20, 34:20:294, 27:20:287, 261:266, 281:286]	Netilmicin Sulfate	S4052	other	Neuronal Signaling		1441.55	56391-57-2		Netilmicin Sulfate is a member of the aminoglycoside family of antibiotics.	C1([C@H]([C@@H]([C@H]([C@@H]([C@@H]1N)O[C@H]2OC(=CC[C@@H]2N)CN)O)OC3OC[C@@]([C@@H]([C@@H]3O)NC)(O)C)NCC).S(=O)(=O)(O)O.S(=O)(=O)(O)O.S(=O)(=O)(O)O.S(=O)(=O)(O)O.S(=O)(=O)(O)O.C4[C@H]([C@@H]([C@H]([C@@H]([C@@H]4N)O[C@H]5OC(=CC[C@@H]5N)CN)O)OC6OC[C@@]([C@@H]([C@@H]6O)NC)(O)C)NCC		http://www.selleckchem.com/products/nabumetone.html
710	1990	L2000-25	h2	2	8	20170502	1	295	300		O15:20	A1:16, B:O7, B:O14, N1:6, O1:6	[1:20, 34:20:294, 27:20:287, 261:266, 281:286]	Amlodipine besylate (Norvasc)	S1813	other			567.05	111470-99-6		Amlodipine (Norvasc) is a long-acting calcium channel blocker with an IC50 of 1.9 nM.	N1(C(=C(C(C(=C1C)C(=O)OC)C2=C(C=CC=C2)Cl)C(=O)OCC)COCCN).C3=C(C=CC=C3)S(O)(=O)=O
711	1991	L2000-25	h3	3	8	20170502	1	275	280		M15:20	A1:16, B:O7, B:O14, N1:6, O1:6	[1:20, 34:20:294, 27:20:287, 261:266, 281:286]	Tolfenamic Acid	S1959	other		COX	261.7	13710-19-5	free base	Tolfenamic acid is a COX-2 inhibitor with IC50 of 0.2 μM.	C1(NC2=CC=CC(=C2C)Cl)=C(C=CC=C1)C(O)=O	198
712	1992	L2000-25	h4	4	8	20170502	1	255	260		N15:20	A1:16, B:O7, B:O14, N1:6, O1:6	[1:20, 34:20:294, 27:20:287, 261:266, 281:286]	Pramipexole dihydrochloride monohydrate	S2011	other			302.26	191217-81-9		Pramipexole is a partial/full D2S, D2L, D3, D4, receptor agonist with a Ki of 3.9, 2.2, 0.5, 5.1 nM.	[C@@H]1(CCC2=C(C1)SC(=N2)N)NCCC.O.Cl.Cl
713	1993	L2000-25	h5	5	8	20170502	1	235	240		L15:20	A1:16, B:O7, B:O14, N1:6, O1:6	[1:20, 34:20:294, 27:20:287, 261:266, 281:286]	Dexmedetomidine HCl (Precedex)	S2090	other		Adrenergic Receptor	236.74	145108-58-3		Dexmedetomidine is a highly selective and potent alpha-2 adrenoceptor agonist, which reduces anesthetic requirements for patients by providing significant sedation.	C1(=C(C(=C(C=C1)C)C)[C@@H](C2NC=NC=2)C).Cl
714	1994	L2000-25	h6	6	8	20170502	1	288	293		O8:13	A1:16, B:O7, B:O14, N1:6, O1:6	[1:20, 34:20:294, 27:20:287, 261:266, 281:286]	DL-Adrenaline	S2523	other		Adrenergic Receptor	183.2	329-65-7		DL-Adrenaline is a hormone and a neurotransmitter secreted by the medulla of the adrenal glands.	C1(=C(C=CC(=C1)C(CNC)O)O)O
715	1995	L2000-25	h7	7	8	20170502	1	268	273		N8:13	A1:16, B:O7, B:O14, N1:6, O1:6	[1:20, 34:20:294, 27:20:287, 261:266, 281:286]	Calcium levofolinate (Calcium Folinate)	S2588	other	Neuronal Signaling		511.5	80433-71-2		Calcium levofolinate (Calcium Folinate) is a calcium salt of folinic acid that is an adjuvant used in cancer chemotherapy.	C1(=C(C=CC(=C1)NC[C@@H]2N(C3=C(NC2)NC(=NC3=O)N)C([H])=O)C(=O)N[C@@H](CCC([O-])=O)C(=O)[O-]).[Ca+2]		http://www.selleckchem.com/products/phenacetin.html
716	1996	L2000-25	h8	8	8	20170502	1	248	253		M8:13	A1:16, B:O7, B:O14, N1:6, O1:6	[1:20, 34:20:294, 27:20:287, 261:266, 281:286]	Bufexamac	S3023	other	Neuronal Signaling	COX	223.27	2438-72-4	free base	Bufexamac is a COX inhibitor for IFN-α release with EC50 of 8.9 μM.	C1(C=CC(=CC=1)OCCCC)CC(=O)NO	201	http://www.selleckchem.com/products/zaltoprofen.html
717	1997	L2000-25	h9	9	8	20170502	1	228	233		L8:13	A1:16, B:O7, B:O14, N1:6, O1:6	[1:20, 34:20:294, 27:20:287, 261:266, 281:286]	Creatinine	S3102	other			113.12	60-27-5		Creatinine is a break-down product of creatine phosphate in muscle, and is usually produced at a fairly constant rate by the body._x000D_	N1C(=N)N(C)CC(=O)1
718	1998	L2000-25	h10	10	8	20170502	1	241	246		M1:6	A1:16, B:O7, B:O14, N1:6, O1:6	[1:20, 34:20:294, 27:20:287, 261:266, 281:286]	Clinafloxacin (PD127391)	S4006	other			365.79	105956-97-6		Clinafloxacin (PD127391) is a fluoroquinolone that inhibits both DNA gyrase and topoisomerase IV dually in Streptococcus pneumoniae.	C12N(C3CC3)C=C(C(C=1C=C(C(=C2Cl)N4CC(N)CC4)F)=O)C(O)=O
719	1999	L2000-25	h11	11	8	20170502	1	221	226		L1:6	A1:16, B:O7, B:O14, N1:6, O1:6	[1:20, 34:20:294, 27:20:287, 261:266, 281:286]	Erythromycin Ethylsuccinate	S4060	other			862.05	1264-62-6		Erythromycin Ethylsuccinate, an oral macrolide antibiotic produced by Streptomyces erythreus, reversibly binds to the 50S ribosome of bacteria, and inhibits protein synthesis.	C1(O[C@H]([C@]([C@@H]([C@H](C([C@@H](C[C@]([C@@H]([C@H]([C@@H]([C@H]1C)O[C@H]2C[C@]([C@H]([C@@H](O2)C)O)(OC)C)C)O[C@H]3[C@@H]([C@H](C[C@H](O3)C)N(C)C)OC(CCC(=O)OCC)=O)(O)C)C)=O)C)O)(O)C)CC)=O
720	2000	L2000-26	a2	2	1	20170503	0	215	220		K15:20	A1:16, B:O7, B:O14, N1:6, O1:6	[1:20, 34:20:294, 27:20:287, 261:266, 281:286]	Dequalinium chloride	S4066	other		PKC	527.57	522-51-0		Dequalinium Chloride is a PKC inhibitor with IC50 of 7-18 μM, and also a selective blocker of apamin-sensitive K+ channels with IC50 of 1.1 μM.	C1(=CC=CC2=C1C(=CC(=[N+]2CCCCCCCCCC[N+]3=C(C=C(C4=C3C=CC=C4)N)C)C)N).[Cl-].[Cl-]
721	2001	L2000-26	a3	3	1	20170503	0	195	200		J15:20	A1:16, B:O7, B:O14, N1:6, O1:6	[1:20, 34:20:294, 27:20:287, 261:266, 281:286]	Sevelamer HCl	S4129	other			186.08	152751-57-0		Sevelamer HCl is a phosphate binding drug used to treat hyperphosphatemia via binding to dietary phosphate and prevents its absorption.	NCC=C.C(C1OC1)Cl.Cl
722	2002	L2000-26	a4	4	1	20170503	0	175	180		I15:20	A1:16, B:O7, B:O14, N1:6, O1:6	[1:20, 34:20:294, 27:20:287, 261:266, 281:286]	EUK 134	S4261	other		Beta Amyloid	416.74	81065-76-1	free base	EUK 134, a synthetic superoxide dismutase (SOD)/catalase mimetic, exhibits potent antioxidant activities, and inhibits the formation of β-amyloid and related amyloid fibril.	C12=CC=CC(=C([O-][Mn+3]34(N(=C1)CCN(=CC5C(=C(OC)C=CC=5)[O-]3)4)[Cl-])2)OC	199
723	2003	L2000-26	a5	5	1	20170503	0	155	160		H15:20	A1:16, B:O7, B:O14, N1:6, O1:6	[1:20, 34:20:294, 27:20:287, 261:266, 281:286]	Calcium Gluceptate	S4311	other			490.42	17140-60-2			C([C@H]([C@H]([C@@H]([C@H]([C@H](C(=O)[O-])O)O)O)O)O)O.C([C@H]([C@H]([C@@H]( [C@H]([C@H](C(=O)[O-])O)O)O)O)O)O.O.O.[Ca+2]
724	2004	L2000-26	a6	6	1	20170503	0	135	140		G15:20	A1:16, B:O7, B:O14, N1:6, O1:6	[1:20, 34:20:294, 27:20:287, 261:266, 281:286]	Dimaprit 2HCl	S4320	other			234.19	23256-33-9			CN(C)CCCSC(=N)N.Cl.Cl
725	2005	L2000-26	a7	7	1	20170503	0	115	120		F15:20	A1:16, B:O7, B:O14, N1:6, O1:6	[1:20, 34:20:294, 27:20:287, 261:266, 281:286]	Meclocycline Sulfosalicylate	S4331	other			695.05	73816-42-9			CN(C)[C@H]1[C@@H]2[C@H]([C@@H]3C(=C)C4=C(C=CC(=C4C(=C3C(=O)[C@@]2(C(=O)/C(=C (/N)\O)/C1=O)O)O)O)Cl)O.C1=CC(=C(C=C1S(=O)(=O)O)C(=O)O)O
726	2006	L2000-26	a8	8	1	20170503	0	95	100		E15:20	A1:16, B:O7, B:O14, N1:6, O1:6	[1:20, 34:20:294, 27:20:287, 261:266, 281:286]	Meticrane	S4339	other			275.34	1084-65-7			CC1=C(C=C2C(=C1)CCCS2(=O)=O)S(=O)(=O)N
727	2007	L2000-26	a9	9	1	20170503	0	75	80		D15:20	A1:16, B:O7, B:O14, N1:6, O1:6	[1:20, 34:20:294, 27:20:287, 261:266, 281:286]	Pipenzolate Bromide	S4347	other			434.37	125-51-9			CC[N+]1(CCCC(C1)OC(=O)C(C2=CC=CC=C2)(C3=CC=CC=C3)O)C.[Br-]
728	2008	L2000-26	a10	10	1	20170503	0	55	60		C15:20	A1:16, B:O7, B:O14, N1:6, O1:6	[1:20, 34:20:294, 27:20:287, 261:266, 281:286]	Thonzonium Bromide	S4355	other			591.71	553-08-2			CCCCCCCCCCCCCCCC[N+](C)(C)CCN(CC1=CC=C(C=C1)OC)C2=NC=CC=N2.Br
729	2009	L2000-26	a11	11	1	20170503	0	35	40		B15:20	A1:16, B:O7, B:O14, N1:6, O1:6	[1:20, 34:20:294, 27:20:287, 261:266, 281:286]	Noscapine HCl	S4363	other			449.88	912-60-7			CN1CCC2=CC3=C(C(=C2[C@@H]1[C@H]4C5=C(C(=C(C=C5)OC)OC)C(=O)O4)OC)OCO3.Cl
730	2010	L2000-26	b2	2	2	20170503	0	208	213		K8:13	A1:16, B:O7, B:O14, N1:6, O1:6	[1:20, 34:20:294, 27:20:287, 261:266, 281:286]	Deferiprone	S4067	other			139.15	30652-11-0		Deferiprone is a chelating agent with an affinity for ferric ion (iron III), binds with ferric ions to form neutral 3:1 (deferiprone:iron) complexes that are stable over a wide range of pH values.	C1(=C(C(C=CN1C)=O)O)C
731	2011	L2000-26	b3	3	2	20170503	0	188	193		J8:13	A1:16, B:O7, B:O14, N1:6, O1:6	[1:20, 34:20:294, 27:20:287, 261:266, 281:286]	Decoquinate	S4145	other			417.54	18507-89-6		Decoquinate is a coccidiostat.	C1(=CN=C2C(=C1O)C=C(C(=C2)OCC)OCCCCCCCCCC)C(=O)OCC
732	2012	L2000-26	b4	4	2	20170503	0	168	173		I8:13	A1:16, B:O7, B:O14, N1:6, O1:6	[1:20, 34:20:294, 27:20:287, 261:266, 281:286]	Benfotiamine	S4300	other	Neuronal Signaling		466.45	22457-89-2			CC1=NC=C(C(=N1)N)CN(C=O)C(=C(CCOP(=O)(O)O)SC(=O)C2=CC=CC=C2)C		http://www.selleckchem.com/products/euk-134.html
733	2013	L2000-26	b5	5	2	20170503	0	148	153		H8:13	A1:16, B:O7, B:O14, N1:6, O1:6	[1:20, 34:20:294, 27:20:287, 261:266, 281:286]	Carbadox	S4312	other			262.22	7/5/6804			COC(=O)N=NC=C1C=[N+](C2=CC=CC=C2N1O)[O-]
734	2014	L2000-26	b6	6	2	20170503	0	128	133		G8:13	A1:16, B:O7, B:O14, N1:6, O1:6	[1:20, 34:20:294, 27:20:287, 261:266, 281:286]	Diphenylpyraline HCl	S4321	other			317.85	132-18-3			Cl.CN1CCC(CC1)OC(C1=CC=CC=C1)C1=CC=CC=C1
735	2015	L2000-26	b7	7	2	20170503	0	108	113		F8:13	A1:16, B:O7, B:O14, N1:6, O1:6	[1:20, 34:20:294, 27:20:287, 261:266, 281:286]	Medrysone	S4332	other			344.49	2668-66-8			C[C@H]1CC2C3CCC(C3(CC(C2C4(C1=CC(=O)CC4)C)O)C)C(=O)C
736	2016	L2000-26	b8	8	2	20170503	0	88	93		E8:13	A1:16, B:O7, B:O14, N1:6, O1:6	[1:20, 34:20:294, 27:20:287, 261:266, 281:286]	Moxalactam Disodium	S4340	other			564.44	64953-12-4			CN1C(=NN=N1)SCC2=C(N3C(C(C3=O)(NC(=O)C(C4=CC=C(C=C4)O)C(=O)[O-])OC)OC2)C(=O) [O-].[Na+].[Na+]
737	2017	L2000-26	b9	9	2	20170503	0	68	73		D8:13	A1:16, B:O7, B:O14, N1:6, O1:6	[1:20, 34:20:294, 27:20:287, 261:266, 281:286]	Piromidic Acid	S4348	other			288.32	19562-30-2			CCn1cc(C(=O)O)c(=O)c2cnc(nc12)N1CCCC1
738	2018	L2000-26	b10	10	2	20170503	0	48	53		C8:13	A1:16, B:O7, B:O14, N1:6, O1:6	[1:20, 34:20:294, 27:20:287, 261:266, 281:286]	Tolazamide	S4356	other			311.4	1156-19-0			CC1=CC=C(C=C1)S(=O)(=O)NC(=O)NN2CCCCCC2
739	2019	L2000-26	b11	11	2	20170503	0	28	33		B8:13	A1:16, B:O7, B:O14, N1:6, O1:6	[1:20, 34:20:294, 27:20:287, 261:266, 281:286]	Phenothrin	S4364	other							CC(=CC1C(C1(C)C)C(=O)OCC2=CC(=CC=C2)OC3=CC=CC=C3)C
740	2020	L2000-26	c2	2	3	20170503	0	201	206		K1:6	A1:16, B:O7, B:O14, N1:6, O1:6	[1:20, 34:20:294, 27:20:287, 261:266, 281:286]	Hexamethonium bromide	S4069	other		AChR	362.19	55-97-0		Hexamethonium Bromide is a selective antagonist of neuronal-type nicotinic AChR in ganglia.	C[N+](CCCCCC[N+](C)(C)C)(C)C.[Br-].[Br-]
741	2021	L2000-26	c3	3	3	20170503	0	181	186		J1:6	A1:16, B:O7, B:O14, N1:6, O1:6	[1:20, 34:20:294, 27:20:287, 261:266, 281:286]	Azithromycin Dihydrate	S4147	other			785.02	117772-70-0		Azithromycin Dihydrate is an acid stable orally administered macrolide antimicrobial drug, structurally related to erythromycin.	O1(C([C@@H]([C@H](C([C@H]([C@@](C[C@H](CN([C@@H]([C@H]([C@@]([C@@H]1CC)(O)C)O)C)C)C)(O)C)O[C@H]2[C@@H]([C@H](C[C@H](O2)C)N(C)C)O)C)O[C@H]3C[C@@]([C@H]([C@@H](O3)C)O)(C)OC)C)=O).O.O
742	2022	L2000-26	c4	4	3	20170503	0	161	166		I1:6	A1:16, B:O7, B:O14, N1:6, O1:6	[1:20, 34:20:294, 27:20:287, 261:266, 281:286]	Alexidine HCl	S4302	other			581.71	22573-93-9			CCCCC(CC)CN=C(N)NC(=NCCCCCCN=C(N)NC(=NCC(CC)CCCC)N)N.Cl.Cl
743	2023	L2000-26	c5	5	3	20170503	0	141	146		H1:6	A1:16, B:O7, B:O14, N1:6, O1:6	[1:20, 34:20:294, 27:20:287, 261:266, 281:286]	Ceftazidime Pentahydrate	S4314	other			636.65	78439-06-2			CC(C)(C(=O)O)O/N=C(/C1=CSC(=N1)N)C(=O)N[C@H]2[C@@H]3N(C2=O)C(=C(CS3)C[N+]4=C C=CC=C4)C(=O)[O-].O.O.O.O.O
744	2024	L2000-26	c6	6	3	20170503	0	121	126		G1:6	A1:16, B:O7, B:O14, N1:6, O1:6	[1:20, 34:20:294, 27:20:287, 261:266, 281:286]	Disopyramide Phosphate	S4322	other			437.47	22059-60-5			CC(C)N(CCC(C1=CC=CC=C1)(C2=CC=CC=N2)C(=O)N)C(C)C.OP(=O)(O)O
745	2025	L2000-26	c7	7	3	20170503	0	101	106		F1:6	A1:16, B:O7, B:O14, N1:6, O1:6	[1:20, 34:20:294, 27:20:287, 261:266, 281:286]	Mepiroxol	S4333	other			125.13	6968-72-5			OCC1=CC=C[N+]([O-])=C1
746	2026	L2000-26	c8	8	3	20170503	0	81	86		E1:6	A1:16, B:O7, B:O14, N1:6, O1:6	[1:20, 34:20:294, 27:20:287, 261:266, 281:286]	Nalmefene HCl	S4341	other			375.89	58895-64-0			C=C1CCC2(C3CC4=C5C2(C1OC5=C(C=C4)O)CCN3CC6CC6)O.Cl
747	2027	L2000-26	c9	9	3	20170503	0	61	66		D1:6	A1:16, B:O7, B:O14, N1:6, O1:6	[1:20, 34:20:294, 27:20:287, 261:266, 281:286]	Procyclidine HCl	S4349	other			323.9	1508-76-5			C1CCC(CC1)C(CCN2CCCC2)(C3=CC=CC=C3)O.Cl
748	2028	L2000-26	c10	10	3	20170503	0	41	46		C1:6	A1:16, B:O7, B:O14, N1:6, O1:6	[1:20, 34:20:294, 27:20:287, 261:266, 281:286]	Tacrine HCl	S4357	other			234.72	1684-40-8			C1CCC2=NC3=CC=CC=C3C(=C2C1)N.Cl
749	2029	L2000-26	c11	11	3	20170503	0	21	26		B1:6	A1:16, B:O7, B:O14, N1:6, O1:6	[1:20, 34:20:294, 27:20:287, 261:266, 281:286]	Phthalylsulfacetamide	S4365	other			362.36	131-69-1			CC(=O)NS(=O)(=O)C1=CC=C(C=C1)NC(=O)C2=CC=CC=C2C(=O)O
750	2030	L2000-26	d2	2	4	20170503	0	295	300		O15:20	A1:16, B:O7, B:O14, N1:6, O1:6	[1:20, 34:20:294, 27:20:287, 261:266, 281:286]	Mefenamic Acid	S4078	other		COX	241.29	61-68-7	free base	Mefenamic acid is a competitive inhibitor of COX-1 and COX-2.	C(C1C(=CC=CC=1)NC2C(=C(C=CC=2)C)C)(=O)O	198
751	2031	L2000-26	d3	3	4	20170503	0	275	280		M15:20	A1:16, B:O7, B:O14, N1:6, O1:6	[1:20, 34:20:294, 27:20:287, 261:266, 281:286]	D-Phenylalanine	S4153	other			165.19	673-06-3		D-Phenylalanine, an carboxypeptidase A, endorphinase and enkephalinase inhibitor, enhances endorphin production and diminishes pain.	C1(C[C@H](C(O)=O)N)C=CC=CC=1
752	2032	L2000-26	d4	4	4	20170503	0	255	260		N15:20	A1:16, B:O7, B:O14, N1:6, O1:6	[1:20, 34:20:294, 27:20:287, 261:266, 281:286]	9-Aminoacridine	S4303	other			194.23	90-45-9			C1=CC=C2C(=C1)C(=C3C=CC=CC3=N2)N
753	2033	L2000-26	d5	5	4	20170503	0	235	240		L15:20	A1:16, B:O7, B:O14, N1:6, O1:6	[1:20, 34:20:294, 27:20:287, 261:266, 281:286]	Clinafoxacin HCl	S4315	other							C1CC1N2C=C(C(=O)C3=CC(=C(C(=C32)Cl)N4CCC(C4)N)F)C(=O)O.Cl
754	2034	L2000-26	d6	6	4	20170503	0	288	293		O8:13	A1:16, B:O7, B:O14, N1:6, O1:6	[1:20, 34:20:294, 27:20:287, 261:266, 281:286]	Emetine	S4323	other			480.64	483-18-1			CC[C@H]1CN2CCC3=CC(=C(C=C3[C@@H]2C[C@@H]1C[C@@H]4C5=CC(=C(C=C5CCN4)OC)OC)OC) OC
755	2035	L2000-26	d7	7	4	20170503	0	268	273		N8:13	A1:16, B:O7, B:O14, N1:6, O1:6	[1:20, 34:20:294, 27:20:287, 261:266, 281:286]	Mesoridazine Besylate	S4334	other			544.75	32672-69-8			CN1CCCCC1CCN2C3=CC=CC=C3SC4=C2C=C(C=C4)S(=O)C.C1=CC=C(C=C1)S(=O)(=O)O
756	2036	L2000-26	d8	8	4	20170503	0	248	253		M8:13	A1:16, B:O7, B:O14, N1:6, O1:6	[1:20, 34:20:294, 27:20:287, 261:266, 281:286]	Nialamide	S4342	other			298.34	51-12-7			O/C(=NCc1ccccc1)/CCNNC(=O)c1ccncc1
757	2037	L2000-26	d9	9	4	20170503	0	228	233		L8:13	A1:16, B:O7, B:O14, N1:6, O1:6	[1:20, 34:20:294, 27:20:287, 261:266, 281:286]	R-(-)-Apomorphine HCl Hemihydrate	S4350	other			312.79	41372-20-7			CN1CCC2=CC=CC3=C2C1CC4=C3C(=C(C=C4)O)O.CN1CCC2=CC=CC3=C2C1CC4=C3C(=C(C=C4)O) O.O.Cl.Cl
758	2038	L2000-26	d10	10	4	20170503	0	241	246		M1:6	A1:16, B:O7, B:O14, N1:6, O1:6	[1:20, 34:20:294, 27:20:287, 261:266, 281:286]	Pimozide	S4358	other			461.55	2062-78-4			C1CN(CCC1N2C3=CC=CC=C3NC2=O)CCCC(C4=CC=C(C=C4)F)C5=CC=C(C=C5)F
759	2039	L2000-26	d11	11	4	20170503	0	221	226		L1:6	A1:16, B:O7, B:O14, N1:6, O1:6	[1:20, 34:20:294, 27:20:287, 261:266, 281:286]	Pinacidil	S4366	other							CC(N\C(NC1=CC=NC=C1)=N\C#N)C(C)(C)C
760	2040	L2000-26	e2	2	5	20170503	1	215	220		K15:20	A1:16, B:O7, B:O14, N1:6, O1:6	[1:20, 34:20:294, 27:20:287, 261:266, 281:286]	Bismuth Subcitrate Potassium	S4093	other	Neuronal Signaling		782.67	880149-29-1		Bismuth Subcitrate is an antibiotic used to treat stomach ulcers associated with Helicobacter pylori, a bacterial infection.	[O-]C(C(CC([O-])=O)(O)CC(=O)[O-])=O.[K+].[K+].[K+].[Bi+3].[K+].[K+].[O-]C(=O)CC(CC(=O)[O-])(C(=O)[O-])O		http://www.selleckchem.com/products/mefenamic-acid.html
761	2041	L2000-26	e3	3	5	20170503	1	195	200		J15:20	A1:16, B:O7, B:O14, N1:6, O1:6	[1:20, 34:20:294, 27:20:287, 261:266, 281:286]	Sodium Gluconate	S4174	other			218.14	527-07-1		Sodium gluconate is the sodium salt of gluconic acid widely used in food and pharmaceutical industry.	[C@H]([C@@H]([C@@H](CO)O)O)([C@H](C(=O)[O-])O)O.[Na+]
762	2042	L2000-26	e4	4	5	20170503	1	175	180		I15:20	A1:16, B:O7, B:O14, N1:6, O1:6	[1:20, 34:20:294, 27:20:287, 261:266, 281:286]	Anisindione	S4304	other			252.26	117-37-3			COC1=CC=C(C=C1)C2C(=O)C3=CC=CC=C3C2=O
763	2043	L2000-26	e5	5	5	20170503	1	155	160		H15:20	A1:16, B:O7, B:O14, N1:6, O1:6	[1:20, 34:20:294, 27:20:287, 261:266, 281:286]	Clopamide	S4316	other			345.84	636-54-4			CC1CCCC(N1NC(=O)C2=CC(=C(C=C2)Cl)S(=O)(=O)N)C
764	2044	L2000-26	e6	6	5	20170503	1	135	140		G15:20	A1:16, B:O7, B:O14, N1:6, O1:6	[1:20, 34:20:294, 27:20:287, 261:266, 281:286]	Ethoxzolamide	S4326	other			258.32	452-35-7			CCOC1=CC2=C(C=C1)N=C(S2)S(=O)(=O)N
765	2045	L2000-26	e7	7	5	20170503	1	115	120		F15:20	A1:16, B:O7, B:O14, N1:6, O1:6	[1:20, 34:20:294, 27:20:287, 261:266, 281:286]	Metaproterenol Sulfate	S4335	other			520.59	5874-97-5			CC(C)NCC(C1=CC(=CC(=C1)O)O)O.CC(C)NCC(C1=CC(=CC(=C1)O)O)O.OS(=O)(=O)O
766	2046	L2000-26	e8	8	5	20170503	1	95	100		E15:20	A1:16, B:O7, B:O14, N1:6, O1:6	[1:20, 34:20:294, 27:20:287, 261:266, 281:286]	Oxethazaine	S4343	other			467.64	126-27-2			CN(C(=O)CN(CCO)CC(=O)N(C)C(C)(C)CC1=CC=CC=C1)C(C)(C)CC1=CC=CC=C1
767	2047	L2000-26	e9	9	5	20170503	1	75	80		D15:20	A1:16, B:O7, B:O14, N1:6, O1:6	[1:20, 34:20:294, 27:20:287, 261:266, 281:286]	Ractopamine HCl	S4351	other			337.84	90274-24-1			CC(CCC1=CC=C(C=C1)O)NCC(C2=CC=C(C=C2)O)O.Cl
768	2048	L2000-26	e10	10	5	20170503	1	55	60		C15:20	A1:16, B:O7, B:O14, N1:6, O1:6	[1:20, 34:20:294, 27:20:287, 261:266, 281:286]	Carbachol	S4359	other			182.65	51-83-2			[Cl-].C[N+](C)(C)CCOC(N)=O
769	2049	L2000-26	e11	11	5	20170503	1	35	40		B15:20	A1:16, B:O7, B:O14, N1:6, O1:6	[1:20, 34:20:294, 27:20:287, 261:266, 281:286]	Carbenoxolone Sodium	S4368	other			614.72	7421-40-1			C[C@]12CC[C@](C[C@H]1C3=CC(=O)[C@@H]4[C@]5(CC[C@@H](C([C@@H]5CC[C@]4([C@@]3( CC2)C)C)(C)C)OC(=O)CCC(=O)[O-])C)(C)C(=O)[O-].[Na+].[Na+]
770	2050	L2000-26	f2	2	6	20170503	1	208	213		K8:13	A1:16, B:O7, B:O14, N1:6, O1:6	[1:20, 34:20:294, 27:20:287, 261:266, 281:286]	Tetramisole HCl	S4094	other			240.75	5086-74-8		Tetramisole is a mixture of dextro- and levo isomers used as an anthelmintic.	C1(CSC2=NC(C3C=CC=CC=3)CN12).Cl
771	2051	L2000-26	f3	3	6	20170503	1	188	193		J8:13	A1:16, B:O7, B:O14, N1:6, O1:6	[1:20, 34:20:294, 27:20:287, 261:266, 281:286]	Amoxapine	S4218	other			313.78	14028-44-5		Amoxapine is a tricyclic dibenzoxazepine (an N-aryl piperazine) which acts similarly to several other tricyclic antidepressants, amoxapine inhibits GLYT2a transport activity with IC50 of 92 μM.	C1(C2=C(OC3=C(N=1)C=CC=C3)C=CC(=C2)Cl)N4CCNCC4
772	2052	L2000-26	f4	4	6	20170503	1	168	173		I8:13	A1:16, B:O7, B:O14, N1:6, O1:6	[1:20, 34:20:294, 27:20:287, 261:266, 281:286]	Anisotropine Methylbromide	S4305	other			362.35	80-50-2			CCCC(CCC)C(=O)OC1C[C@H]2CC[C@@H](C1)[N+]2(C)C.Br
773	2053	L2000-26	f5	5	6	20170503	1	148	153		H8:13	A1:16, B:O7, B:O14, N1:6, O1:6	[1:20, 34:20:294, 27:20:287, 261:266, 281:286]	Clorgyline HCl	S4317	other			308.63	17780-75-5			CN(CCCOC1=C(C=C(C=C1)Cl)Cl)CC#C.Cl
774	2054	L2000-26	f6	6	6	20170503	1	128	133		G8:13	A1:16, B:O7, B:O14, N1:6, O1:6	[1:20, 34:20:294, 27:20:287, 261:266, 281:286]	Famprofazone	S4327	other			377.52	22881-35-2			CC(C)C1=C(N(N(C1=O)C2=CC=CC=C2)C)CN(C)C(C)CC3=CC=CC=C3
775	2055	L2000-26	f7	7	6	20170503	1	108	113		F8:13	A1:16, B:O7, B:O14, N1:6, O1:6	[1:20, 34:20:294, 27:20:287, 261:266, 281:286]	Metaraminol Bitartrate	S4336	other			317.29	33402-03-8			C[C@@H]([C@@H](C1=CC(=CC=C1)O)O)N.C(C(C(=O)O)O)(C(=O)O)O.C(C(C(=O)O)O)(C(=O) O)O
776	2056	L2000-26	f8	8	6	20170503	1	88	93		E8:13	A1:16, B:O7, B:O14, N1:6, O1:6	[1:20, 34:20:294, 27:20:287, 261:266, 281:286]	Oxprenolol HCl	S4344	other			301.81	6452-73-9			C15H23NO3 HCl
777	2057	L2000-26	f9	9	6	20170503	1	68	73		D8:13	A1:16, B:O7, B:O14, N1:6, O1:6	[1:20, 34:20:294, 27:20:287, 261:266, 281:286]	Rolitetracycline	S4352	other			527.57	751-97-3			CN(C)[C@H]1[C@@H]2C[C@H]3C(C(=O)C4=C(O)C=CC=C4[C@@]3(C)O)=C(O)[C@]2(O)C(=O)C (C(=O)NCN2CCCC2)=C1O
778	2058	L2000-26	f10	10	6	20170503	1	48	53		C8:13	A1:16, B:O7, B:O14, N1:6, O1:6	[1:20, 34:20:294, 27:20:287, 261:266, 281:286]	Tolmetin Sodium	S4360	other			315.3	64490-92-2			CC1=CC=C(C=C1)C(=O)C2=CC=C(N2C)CC(=O)O.O.O.[Na+]
779	2059	L2000-26	f11	11	6	20170503	1	28	33		B8:13	A1:16, B:O7, B:O14, N1:6, O1:6	[1:20, 34:20:294, 27:20:287, 261:266, 281:286]	Hydrastinine HCl	S4369	other							N/A
780	2060	L2000-26	g2	2	7	20170503	1	201	206		K1:6	A1:16, B:O7, B:O14, N1:6, O1:6	[1:20, 34:20:294, 27:20:287, 261:266, 281:286]	Clodronate Disodium	S4108	other			288.86	22560-50-5		Clodronate Disodium, a bisphosphonate, is a potent antiosteolytic agent which inhibits bone resorption.	C(P(O)(=O)[O-])(P(O)(=O)[O-])(Cl)Cl.[Na+].[Na+]
781	2061	L2000-26	g3	3	7	20170503	1	181	186		J1:6	A1:16, B:O7, B:O14, N1:6, O1:6	[1:20, 34:20:294, 27:20:287, 261:266, 281:286]	Minocycline HCl	S4226	other			493.94	13614-98-7		Minocycline HCl is the most lipid soluble and most active tetracycline antibiotic, binds to the 30S ribosomal subunit, preventing the binding of tRNA to the mRNA-ribosome complex and interfering with protein synthesis.	[C@@]12([C@](C(=C3[C@@](C1)(CC4C(=CC=C(C(C3=O)=4)O)N(C)C)[H])O)(C(C(=C([C@H]2N(C)C)O)C(N)=O)=O)O)[H].Cl
782	2062	L2000-26	g4	4	7	20170503	1	161	166		I1:6	A1:16, B:O7, B:O14, N1:6, O1:6	[1:20, 34:20:294, 27:20:287, 261:266, 281:286]	Benzthiazide	S4308	other			431.94	91-33-8			C1=CC=C(C=C1)CSCC2=NS(=O)(=O)C3=CC(=C(C=C3N2)Cl)S(=O)(=O)N
783	2063	L2000-26	g5	5	7	20170503	1	141	146		H1:6	A1:16, B:O7, B:O14, N1:6, O1:6	[1:20, 34:20:294, 27:20:287, 261:266, 281:286]	Colistimethate Sodium	S4318	other			1759.9	8068-28-8			[Na+].[Na+].[Na+].[Na+].[Na+].CS([O-])(=O)=O.CS([O-])(=O)=O.CS([O-])(=O)=O.C S([O-])(=O)=O.CS([O-])(=O)=O.CCC(C)CCCCC(=O)N[C@@H](CCN)C(=O)N[C@@H]([C@@H]( C)O)C(=O)N[C@@H](CCN)C(=O)N[C@H]1CCNC(=O)[C@@H](NC(=O)[C@H](CCN)NC(=O)[C@@H] (CCN)NC(=O)[C@H](CC(C)C)NC(=O)[C@@H](CC(C)C)NC(=O)[C@H](CCN)NC1=O)[C@@H](C)O
784	2064	L2000-26	g6	6	7	20170503	1	121	126		G1:6	A1:16, B:O7, B:O14, N1:6, O1:6	[1:20, 34:20:294, 27:20:287, 261:266, 281:286]	Guanethidine Sulfate	S4328	other			494.7	60-02-6			C1CCCN(CCC1)CCN=C(N)N.C1CCCN(CCC1)CCN=C(N)N.OS(=O)(=O)O
785	2065	L2000-26	g7	7	7	20170503	1	101	106		F1:6	A1:16, B:O7, B:O14, N1:6, O1:6	[1:20, 34:20:294, 27:20:287, 261:266, 281:286]	Methapyrilene HCl	S4337	other			297.85	135-23-9			CN(C)CCN(CC1=CC=CS1)C2=CC=CC=N2.Cl
786	2066	L2000-26	g8	8	7	20170503	1	81	86		E1:6	A1:16, B:O7, B:O14, N1:6, O1:6	[1:20, 34:20:294, 27:20:287, 261:266, 281:286]	Pentoxifylline	S4345	other			278.31	5/6/6493			CC(=O)CCCCN1C(=O)C2=C(N=CN2C)N(C1=O)C
787	2067	L2000-26	g9	9	7	20170503	1	61	66		D1:6	A1:16, B:O7, B:O14, N1:6, O1:6	[1:20, 34:20:294, 27:20:287, 261:266, 281:286]	Terfenadine	S4353	other			471.67	50679-08-8			CC(C)(C)C1=CC=C(C=C1)C(CCCN2CCC(CC2)C(C3=CC=CC=C3)(C4=CC=CC=C4)O)O
788	2068	L2000-26	g10	10	7	20170503	1	41	46		C1:6	A1:16, B:O7, B:O14, N1:6, O1:6	[1:20, 34:20:294, 27:20:287, 261:266, 281:286]	Cinoxacin	S4361	other			262.22	28657-80-9			CCN1C2=CC3=C(C=C2C(=O)C(=N1)C(=O)O)OCO3
789	2069	L2000-26	g11	11	7	20170503	1	21	26		B1:6	A1:16, B:O7, B:O14, N1:6, O1:6	[1:20, 34:20:294, 27:20:287, 261:266, 281:286]	Nicotine Ditartrate	S4370	other			462.46	65-31-6			CN1CCCC1C2=CN=CC=C2.C(C(C(=O)O)O)(C(=O)O)O.C(C(C(=O)O)O)(C(=O)O)O
790	2070	L2000-26	h2	2	8	20170503	1	295	300		O15:20	A1:16, B:O7, B:O14, N1:6, O1:6	[1:20, 34:20:294, 27:20:287, 261:266, 281:286]	Histamine Phosphate	S4117	other			307.14	51-74-1		Histamine acts directly on the blood vessels to dilate arteries and capillaries mediated by both H 1- and H 2-receptors.	N1(C=NC(=C1)CCN).P(=O)(=O)OO.[HH].P(=O)(=O)OO.[HH]
791	2071	L2000-26	h3	3	8	20170503	1	275	280		M15:20	A1:16, B:O7, B:O14, N1:6, O1:6	[1:20, 34:20:294, 27:20:287, 261:266, 281:286]	Deoxycorticosterone acetate	S4243	other			372.5	56-47-3		Deoxycorticosterone acetate is a steroid hormone used for intramuscular injection for replacement therapy of the adrenocortical steroid.	C1C(C=C2[C@](C1)([C@]3([C@@](CC2)([C@]4([C@](CC3)([C@@H](CC4)C(COC(=O)C)=O)C)[H])[H])[H])C)=O
792	2072	L2000-26	h4	4	8	20170503	1	255	260		N15:20	A1:16, B:O7, B:O14, N1:6, O1:6	[1:20, 34:20:294, 27:20:287, 261:266, 281:286]	Butacaine	S4310	other			306.44	149-16-6			CCCCN(CCCC)CCCOC(=O)C1=CC=C(C=C1)N
793	2073	L2000-26	h5	5	8	20170503	1	235	240		L15:20	A1:16, B:O7, B:O14, N1:6, O1:6	[1:20, 34:20:294, 27:20:287, 261:266, 281:286]	Dibenzepine HCl	S4319	other			331.84	315-80-0			CN1C2=CC=CC=C2C(=O)N(C3=CC=CC=C31)CCN(C)C.Cl
794	2074	L2000-26	h6	6	8	20170503	1	288	293		O8:13	A1:16, B:O7, B:O14, N1:6, O1:6	[1:20, 34:20:294, 27:20:287, 261:266, 281:286]	Isoetharine Mesylate	S4330	other			335.42	7279-75-6			CCC(C(C1=CC(=C(C=C1)O)O)O)NC(C)C.CS(=O)(=O)O
795	2075	L2000-26	h7	7	8	20170503	1	268	273		N8:13	A1:16, B:O7, B:O14, N1:6, O1:6	[1:20, 34:20:294, 27:20:287, 261:266, 281:286]	Methoxamine HCl	S4338	other			247.72	61-16-5			CC(C(C1=C(C=CC(=C1)OC)OC)O)N.Cl
796	2076	L2000-26	h8	8	8	20170503	1	248	253		M8:13	A1:16, B:O7, B:O14, N1:6, O1:6	[1:20, 34:20:294, 27:20:287, 261:266, 281:286]	Physostigmine Salicylate	S4346	other			413.47	57-64-7			C[C@@]12CCN(C1N(C3=C2C=C(C=C3)OC(=O)NC)C)C.C1=CC=C(C(=C1)C(=O)O)O
797	2077	L2000-26	h9	9	8	20170503	1	228	233		L8:13	A1:16, B:O7, B:O14, N1:6, O1:6	[1:20, 34:20:294, 27:20:287, 261:266, 281:286]	Thiostrepton	S4354	other			1664.89	1393-48-2			CCC(C)[C@@H]1N[C@@H]2C=CC3=C(N=C(C=C3[C@H](C)O)C(=O)O[C@H](C)[C@@H]3NC(=O)C4 =CSC(=N4)[C@@H](NC(=O)[C@H]4CSC(=N4)\C(NC(=O)[C@@H](NC(=O)C4=CSC(=N4)[C@]4(C CC(=N[C@H]4C4=CSC3=N4)C3=NC(=CS3)C(=O)NC(=C)C(=O)NC(=C)C(N)=O)NC(=O)[C@H](C) NC(=O)C(=C)NC(=O)[C@H](C)NC1=O)[C@@H](C)O)=C/C)[C@@](C)(O)[C@@H](C)O)[C@H]2O
798	2078	L2000-26	h10	10	8	20170503	1	241	246		M1:6	A1:16, B:O7, B:O14, N1:6, O1:6	[1:20, 34:20:294, 27:20:287, 261:266, 281:286]	Glafenine HCl	S4362	other			409.26	65513-72-6			C1=CC=C(C(=C1)C(=O)OCC(CO)O)NC2=C3C=CC(=CC3=NC=C2)Cl.Cl
799	2079	L2000-26	h11	11	8	20170503	1	221	226		L1:6	A1:16, B:O7, B:O14, N1:6, O1:6	[1:20, 34:20:294, 27:20:287, 261:266, 281:286]	Pridinol Methanesulfonate	S4371	other			391.52	6856-31-1			CS(=O)(=O)O.C1CCN(CC1)CCC(C2=CC=CC=C2)(C3=CC=CC=C3)O
800	2080	L2000-27	a2	2	1	20170504	0	215	220		K15:20	A1:16, B:O7, B:O14, N1:6, O1:6	[1:20, 34:20:294, 27:20:287, 261:266, 281:286]	Triflupromazine HCl	S4372	other			388.88	1098-60-8			CN(C)CCCN1C2=CC=CC=C2SC3=C1C=C(C=C3)C(F)(F)F.Cl
801	2081	L2000-27	a3	3	1	20170504	0	195	200		J15:20	A1:16, B:O7, B:O14, N1:6, O1:6	[1:20, 34:20:294, 27:20:287, 261:266, 281:286]	Proadifen HCl	S4381	other			390.01	62-68-0			Cl.CCCC(C(=O)OCCN(CC)CC)(C1=CC=CC=C1)C1=CC=CC=C1
802	2082	L2000-27	a4	4	1	20170504	0	175	180		I15:20	A1:16, B:O7, B:O14, N1:6, O1:6	[1:20, 34:20:294, 27:20:287, 261:266, 281:286]	Bephenium Hydroxynaphthoate	S4389	other			443.53	3818-50-6			C[N+](C)(CCOC1=CC=CC=C1)CC2=CC=CC=C2.C1=CC=C2C=C(C(=CC2=C1)C(=O)O)[O-]
803	2083	L2000-27	a5	5	1	20170504	0	155	160		H15:20	A1:16, B:O7, B:O14, N1:6, O1:6	[1:20, 34:20:294, 27:20:287, 261:266, 281:286]	Isoxicam	S4398	other			335.34	34552-84-6			CC1=CC(=NO1)NC(=O)C2=C(C3=CC=CC=C3S(=O)(=O)N2C)O
804	2084	L2000-27	a6	6	1	20170504	0	135	140		G15:20	A1:16, B:O7, B:O14, N1:6, O1:6	[1:20, 34:20:294, 27:20:287, 261:266, 281:286]	Prochlorperazine Dimaleate	S4407	other			606.09	2/6/1984			N/A
805	2086	L2000-27	b2	2	2	20170504	0	115	120		F15:20	A1:16, B:O7, B:O14, N1:6, O1:6	[1:20, 34:20:294, 27:20:287, 261:266, 281:286]	Dicyclomine HCl	S4373	other			345.95	67-92-5			N/A
806	2087	L2000-27	b3	3	2	20170504	0	95	100		E15:20	A1:16, B:O7, B:O14, N1:6, O1:6	[1:20, 34:20:294, 27:20:287, 261:266, 281:286]	Pyrilamine Maleate	S4382	other			401.46	59-33-6			CN(C)CCN(CC1=CC=C(C=C1)OC)C2=CC=CC=N2.C(=CC(=O)O)C(=O)O
807	2088	L2000-27	b4	4	2	20170504	0	75	80		D15:20	A1:16, B:O7, B:O14, N1:6, O1:6	[1:20, 34:20:294, 27:20:287, 261:266, 281:286]	Brucine	S4390	other			510.56	652154-10-4			O.OS(O)(=O)=O.COC1=CC2=C(C=C1OC)[C@@]13CCN4CC5=CCO[C@H]6CC(=O)N2[C@H]1[C@H]6 [C@H]5C[C@@H]34.COC1=CC2=C(C=C1OC)[C@@]13CCN4CC5=CCO[C@H]6CC(=O)N2[C@H]1[C@H ]6[C@H]5C[C@@H]34
808	2089	L2000-27	b5	5	2	20170504	0	55	60		C15:20	A1:16, B:O7, B:O14, N1:6, O1:6	[1:20, 34:20:294, 27:20:287, 261:266, 281:286]	Lithium Citrate	S4399	other			281.98	6080-58-6			[Li+].[Li+].[Li+].C(C(=O)[O-])C(CC(=O)[O-])(C(=O)[O-])O
809	2090	L2000-27	b6	6	2	20170504	0	35	40		B15:20	A1:16, B:O7, B:O14, N1:6, O1:6	[1:20, 34:20:294, 27:20:287, 261:266, 281:286]	Procodazole	S4408	other			190.2	23249-97-0			C1=CC=C2C(=C1)NC(=N2)CCC(=O)O
810	2092	L2000-27	c2	2	3	20170504	0	208	213		K8:13	A1:16, B:O7, B:O14, N1:6, O1:6	[1:20, 34:20:294, 27:20:287, 261:266, 281:286]	Thioridazine HCl	S4374	other			407.04	130-61-0			CN1CCCCC1CCN2C3=CC=CC=C3SC4=C2C=C(C=C4)SC.Cl
811	2093	L2000-27	c3	3	3	20170504	0	188	193		J8:13	A1:16, B:O7, B:O14, N1:6, O1:6	[1:20, 34:20:294, 27:20:287, 261:266, 281:286]	Bekanamycin	S4383	other			483.51	4696-76-8			N/A
812	2094	L2000-27	c4	4	3	20170504	0	168	173		I8:13	A1:16, B:O7, B:O14, N1:6, O1:6	[1:20, 34:20:294, 27:20:287, 261:266, 281:286]	Camylofin Chlorhydrate	S4391	other			393.39	54-30-8			CCN(CC)CCNC(C1=CC=CC=C1)C(=O)OCCC(C)C.Cl.Cl
813	2095	L2000-27	c5	5	3	20170504	0	148	153		H8:13	A1:16, B:O7, B:O14, N1:6, O1:6	[1:20, 34:20:294, 27:20:287, 261:266, 281:286]	Lofexidine HCl	S4400	other			295.59	21498-08-8			CC(C1=NCCN1)OC2=C(C=CC=C2Cl)Cl.Cl
814	2096	L2000-27	c6	6	3	20170504	0	128	133		G8:13	A1:16, B:O7, B:O14, N1:6, O1:6	[1:20, 34:20:294, 27:20:287, 261:266, 281:286]	Quipazine Maleate	S4409	other			329.35	5786-68-5			C1NCCN(C1)C2=NC3=CC=CC=C3C=C2.C(=CC(=O)O)C(=O)O.C(=CC(=O)O)C(=O)O
815	2098	L2000-27	d2	2	4	20170504	0	108	113		F8:13	A1:16, B:O7, B:O14, N1:6, O1:6	[1:20, 34:20:294, 27:20:287, 261:266, 281:286]	Mepenzolate Bromide	S4375	other			205.68	76-90-4			Br.C[N]1(C)CCCC(C1)OC(=O)C(O)(C1=CC=CC=C1)C1=CC=CC=C1
816	2099	L2000-27	d3	3	4	20170504	0	88	93		E8:13	A1:16, B:O7, B:O14, N1:6, O1:6	[1:20, 34:20:294, 27:20:287, 261:266, 281:286]	Difloxacin HCl	S4384	other			259.19	91296-86-5			N/A
817	2100	L2000-27	d4	4	4	20170504	0	68	73		D8:13	A1:16, B:O7, B:O14, N1:6, O1:6	[1:20, 34:20:294, 27:20:287, 261:266, 281:286]	Potassium Canrenoate	S4392	other			396.56	4/6/2181			C[C@]12CCC(=O)C=C1C=C[C@@H]3[C@@H]2CC[C@]4([C@H]3CC[C@]4(CCC(=O)O)O)C.[K]
818	2101	L2000-27	d5	5	4	20170504	0	48	53		C8:13	A1:16, B:O7, B:O14, N1:6, O1:6	[1:20, 34:20:294, 27:20:287, 261:266, 281:286]	Nifenazone	S4401	other			308.33	2139-47-1			CN1N(C(=O)C(NC(=O)C2=CC=CN=C2)=C1C)C1=CC=CC=C1
819	2102	L2000-27	d6	6	4	20170504	0	28	33		B8:13	A1:16, B:O7, B:O14, N1:6, O1:6	[1:20, 34:20:294, 27:20:287, 261:266, 281:286]	Tetraethylenepentamine 5HCl	S4410	other			371.61	4961-41-5			C(CNCCNCCNCCN)N.Cl.Cl.Cl.Cl.Cl
820	2104	L2000-27	e2	2	5	20170504	0	201	206		K1:6	A1:16, B:O7, B:O14, N1:6, O1:6	[1:20, 34:20:294, 27:20:287, 261:266, 281:286]	Aceclidine HCl	S4376	other			205.68	6109-70-2			CC(=O)OC1CN2CCC1CC2.Cl
821	2105	L2000-27	e3	3	5	20170504	0	181	186		J1:6	A1:16, B:O7, B:O14, N1:6, O1:6	[1:20, 34:20:294, 27:20:287, 261:266, 281:286]	Fosfomycin Tromethamine	S4385	other			259.19	78964-85-9			N/A
822	2106	L2000-27	e4	4	5	20170504	0	161	166		I1:6	A1:16, B:O7, B:O14, N1:6, O1:6	[1:20, 34:20:294, 27:20:287, 261:266, 281:286]	Clofoctol	S4394	other			365.34	37693-01-9			CC(C)(C)CC(C)(C)C1=CC(=C(C=C1)O)CC2=C(C=C(C=C2)Cl)Cl
823	2107	L2000-27	e5	5	5	20170504	0	141	146		H1:6	A1:16, B:O7, B:O14, N1:6, O1:6	[1:20, 34:20:294, 27:20:287, 261:266, 281:286]	Oxeladin Citrate	S4402	other			527.6	52432-72-1			CCC(CC)(C1=CC=CC=C1)C(=O)OCCOCCN(CC)CC.CC(CC(=O)O)(CC(=O)O)C(=O)O
824	2108	L2000-27	e6	6	5	20170504	0	121	126		G1:6	A1:16, B:O7, B:O14, N1:6, O1:6	[1:20, 34:20:294, 27:20:287, 261:266, 281:286]	Phosphatidylcholine	S4411	other			364.46	13492-01-8			C1C(C1[NH3+])C2=CC=CC=C2.C1C(C1[NH3+])C2=CC=CC=C2.[O-]S(=O)(=O)[O-]
825	2109	L2000-27	f2	2	6	20170504	0	101	106		F1:6	A1:16, B:O7, B:O14, N1:6, O1:6	[1:20, 34:20:294, 27:20:287, 261:266, 281:286]	Imipramine HCl	S4377	other			316.87	113-52-0			CN(C)CCCN1C2=CC=CC=C2CCC3=CC=CC=C31.Cl
826	2110	L2000-27	f3	3	6	20170504	0	81	86		E1:6	A1:16, B:O7, B:O14, N1:6, O1:6	[1:20, 34:20:294, 27:20:287, 261:266, 281:286]	Acetarsone	S4386	other			275.09	97-44-9			CC(=O)NC1=C(C=CC(=C1)[As](=O)(O)O)O
827	2111	L2000-27	f4	4	6	20170504	0	61	66		D1:6	A1:16, B:O7, B:O14, N1:6, O1:6	[1:20, 34:20:294, 27:20:287, 261:266, 281:286]	Dichlorisone Acetate	S4395	other			455.37	79-61-8			CC(=O)OCC(=O)[C@@]1(O)CC[C@H]2[C@@H]3CCC4=CC(=O)C=C[C@]4(C)[C@@]3(Cl)[C@@H]( Cl)C[C@]12C
828	2112	L2000-27	f5	5	6	20170504	0	41	46		C1:6	A1:16, B:O7, B:O14, N1:6, O1:6	[1:20, 34:20:294, 27:20:287, 261:266, 281:286]	Pasiniazid	S4404	other			290.27	2066-89-9			C1=CC(=C(C=C1N)O)C(=O)O.C1=CN=CC=C1C(=O)NN
829	2113	L2000-27	f6	6	6	20170504	0	21	26		B1:6	A1:16, B:O7, B:O14, N1:6, O1:6	[1:20, 34:20:294, 27:20:287, 261:266, 281:286]	Nitarsone	S4413	other							C1=CC(=CC=C1[N+](=O)[O-])[As](=O)(O)O
830	2114	L2000-27	g2	2	7	20170504	0	295	300		O15:20	A1:16, B:O7, B:O14, N1:6, O1:6	[1:20, 34:20:294, 27:20:287, 261:266, 281:286]	Methylhydantoin-5-(D)	S4378	other			114.1	55147-68-7			C[C@H]1NC(=O)NC1=O
831	2115	L2000-27	g3	3	7	20170504	0	275	280		M15:20	A1:16, B:O7, B:O14, N1:6, O1:6	[1:20, 34:20:294, 27:20:287, 261:266, 281:286]	Bendroflumethiazide	S4387	other			421.41	73-48-3			C1=CC=C(C=C1)CC2NC3=C(C=C(C(=C3)C(F)(F)F)S(=O)(=O)N)S(=O)(=O)N2
832	2116	L2000-27	g4	4	7	20170504	0	255	260		N15:20	A1:16, B:O7, B:O14, N1:6, O1:6	[1:20, 34:20:294, 27:20:287, 261:266, 281:286]	Digoxigenin	S4396	other			390.51	1672-46-4			C[C@]12CC[C@@H](C[C@H]1CC[C@@H]3[C@@H]2C[C@H]([C@]4([C@@]3(CC[C@@H]4C5=CC(=O )OC5)O)C)O)O
833	2117	L2000-27	g5	5	7	20170504	0	235	240		L15:20	A1:16, B:O7, B:O14, N1:6, O1:6	[1:20, 34:20:294, 27:20:287, 261:266, 281:286]	Picrotoxinin	S4405	other			292.28	17617-45-7			CC(=C)[C@@H]1[C@@H]2[C@@H]3[C@@]4([C@]([C@@H]1C(=O)O2)(C[C@@H]5[C@]4(O5)C(=O )O3)O)C
834	2118	L2000-27	g6	6	7	20170504	0	288	293		O8:13	A1:16, B:O7, B:O14, N1:6, O1:6	[1:20, 34:20:294, 27:20:287, 261:266, 281:286]	Sodium 4-aminohippurate Hydrate	S4414	other			216.17	94-16-6			C1=CC(=CC=C1C(=O)NCC(=O)[O-])N.[Na+]
835	2119	L2000-27	h2	2	8	20170504	0	268	273		N8:13	A1:16, B:O7, B:O14, N1:6, O1:6	[1:20, 34:20:294, 27:20:287, 261:266, 281:286]	Nomifensine Maleate	S4380	other			354.4	32795-47-4			OC(=O)\C=C/C(O)=O.CN1CC(C2=CC=CC=C2)C2=CC=CC(N)=C2C1
836	2120	L2000-27	h3	3	8	20170504	0	248	253		M8:13	A1:16, B:O7, B:O14, N1:6, O1:6	[1:20, 34:20:294, 27:20:287, 261:266, 281:286]	Bentiromide	S4388	other			404.42	37106-97-1			C1=CC=C(C=C1)C(=O)N[C@@H](CC2=CC=C(C=C2)O)C(=O)NC3=CC=C(C=C3)C(=O)O
837	2121	L2000-27	h4	4	8	20170504	0	228	233		L8:13	A1:16, B:O7, B:O14, N1:6, O1:6	[1:20, 34:20:294, 27:20:287, 261:266, 281:286]	Diperodon HCl	S4397	other			433.93	537-12-2			C1CCN(CC1)CC(COC(=O)NC2=CC=CC=C2)OC(=O)NC3=CC=CC=C3.Cl
838	2122	L2000-27	h5	5	8	20170504	0	241	246		M1:6	A1:16, B:O7, B:O14, N1:6, O1:6	[1:20, 34:20:294, 27:20:287, 261:266, 281:286]	Pindolol	S4406	other			248.32	13523-86-9			CC(C)NCC(O)COC1=CC=CC2=C1C=CN2
839	2123	L2000-27	h6	6	8	20170504	0	221	226		L1:6	A1:16, B:O7, B:O14, N1:6, O1:6	[1:20, 34:20:294, 27:20:287, 261:266, 281:286]	Trimipramine Maleate	S4416	other			410.51	521-78-8			OC(=O)\C=C/C(O)=O.CC(CN(C)C)CN1C2=CC=CC=C2CCC2=C1C=CC=C2
840	2124	L2000-01	a2	2	1	20170505	0	215	220		K15:20	A1:16, B:O7, B:O14, N8:13, O8:13	[1:20, 34:20:294, 27:20:287, 268:273, 288:293]	Linifanib (ABT-869)	S1003	kinase	Protein Tyrosine Kinase	CSF-1R,PDGFR,VEGFR	375.41	796967-16-3	free base	Linifanib (ABT-869) is a novel, potent ATP-competitive VEGFR/PDGFR inhibitor for KDR, CSF-1R, Flt-1/3 and PDGFRβ with IC50 of 4 nM, 3 nM, 3 nM/4 nM and 66 nM respectively, mostly effective in mutant kinase-dependent cancer cells (i.e. FLT3). Phase 3.	C12=CC=CC(=C1C(=NN2)N)C3=CC=C(C=C3)NC(=O)NC4=C(C=CC(=C4)C)F	199	http://www.selleckchem.com/products/ABT-869.html
841	2125	L2000-01	a3	3	1	20170505	0	195	200		J15:20	A1:16, B:O7, B:O14, N8:13, O8:13	[1:20, 34:20:294, 27:20:287, 268:273, 288:293]	Cediranib (AZD2171)	S1017	kinase	Protein Tyrosine Kinase	VEGFR	450.51	288383-20-0	free base	Cediranib (AZD2171) is a highly potent VEGFR(KDR) inhibitor with IC50 of <1 nM, also inhibits Flt1/4 with IC50 of 5 nM/≤3 nM, similar activity against c-Kit and PDGFRβ, 36-, 110-fold and >1000-fold selective more for VEGFR than PDGFR-α, CSF-1R and Flt3, Phase 2/3.	C1(=C(C=C2C(=C1)C(=NC=N2)OC3=C(C4=C(C=C3)NC(=C4)C)F)OCCCN5CCCC5)OC	199	http://www.selleckchem.com/products/Cediranib.html
842	2126	L2000-01	a4	4	1	20170505	0	175	180		I15:20	A1:16, B:O7, B:O14, N8:13, O8:13	[1:20, 34:20:294, 27:20:287, 268:273, 288:293]	Imatinib Mesylate (STI571)	S1026	kinase	Protein Tyrosine Kinase	c-Kit,Bcr-Abl,PDGFR	589.71	220127-57-1	mesylate	Imatinib Mesylate (STI571) is an orally bioavailability mesylate salt of Imatinib, which is a multi-target inhibitor of v-Abl, c-Kit and PDGFR with IC50 of 0.6 μM, 0.1 μM and 0.1 μM, respectively.	C1(=CC=C(C(=C1)NC2=NC=CC(=N2)C3=CC=CN=C3)C)NC(=O)C4(=CC=C(C=C4)CN5CCN(CC5)C).OS(C)(=O)=O	200	http://www.selleckchem.com/products/Imatinib-Mesylate.html
843	2127	L2000-01	a5	5	1	20170505	0	155	160		H15:20	A1:16, B:O7, B:O14, N8:13, O8:13	[1:20, 34:20:294, 27:20:287, 268:273, 288:293]	Rapamycin (Sirolimus)	S1039	kinase	PI3K/Akt/mTOR	Autophagy,mTOR	914.18	53123-88-9	free base	Rapamycin (Sirolimus, AY-22989, WY-090217) is a specific mTOR inhibitor with IC50 of ~0.1 nM.	[C@@H]1([C@@H](C[C@@H](CC1)C[C@H]([C@@H]2CC([C@@H](/C=C(\C)[C@H]([C@@H](C([C@@H](C[C@@H](/C=C/C=C/C=C(/[C@H](C[C@@H]3CC[C@H]([C@](C(C(N4CCCC[C@@H](C(O2)=O)4)=O)=O)(O3)O)C)OC)C)C)C)=O)OC)O)C)=O)C)OC)O	21	http://www.selleckchem.com/products/Rapamycin.html
844	2128	L2000-01	a6	6	1	20170505	0	135	140		G15:20	A1:16, B:O7, B:O14, N8:13, O8:13	[1:20, 34:20:294, 27:20:287, 268:273, 288:293]	Enzastaurin (LY317615)	S1055	kinase	TGF-beta/Smad	PKC	515.61	170364-57-5	free base	Enzastaurin (LY317615) is a potent PKCβ selective inhibitor with IC50 of 6 nM, 6- to 20-fold selectivity against PKCα, PKCγ and PKCε. Phase 3.	C1=CC=C2C(=C1)C(=CN2C3CCN(CC3)CC4=NC=CC=C4)C5C(NC(C=5C6C7C(N(C=6)C)=CC=CC=7)=O)=O	58	http://www.selleckchem.com/products/Enzastaurin.html
845	2129	L2000-01	a7	7	1	20170505	0	115	120		F15:20	A1:16, B:O7, B:O14, N8:13, O8:13	[1:20, 34:20:294, 27:20:287, 268:273, 288:293]	SB216763	S1075	kinase	PI3K/Akt/mTOR	GSK-3	371.22	280744-09-4	free base	SB216763 is a potent and selective GSK-3 inhibitor with IC50 of 34.3 nM for GSK-3α and equally effective at inhibiting human GSK-3β.	C1=CC=CC2=C1N(C=C2C3=C(C(NC3=O)=O)C4=CC=C(C=C4Cl)Cl)C	61	http://www.selleckchem.com/products/SB-216763.html
846	2130	L2000-01	a8	8	1	20170505	0	95	100		E15:20	A1:16, B:O7, B:O14, N8:13, O8:13	[1:20, 34:20:294, 27:20:287, 268:273, 288:293]	KU-55933 (ATM Kinase Inhibitor)	S1092	kinase	DNA Damage	ATM/ATR	395.49	587871-26-9	free base	KU-55933 is a potent and specific ATM inhibitor with IC50/Ki of 12.9 nM/2.2 nM, and is highly selective for ATM as compared to DNA-PK, PI3K/PI4K, ATR and mTOR.	C1=CC=C2C(=C1)SC3=C(S2)C=CC=C3C4=CC(C=C(O4)N5CCOCC5)=O	83	http://www.selleckchem.com/products/KU-55933.html
847	2131	L2000-01	a9	9	1	20170505	0	75	80		D15:20	A1:16, B:O7, B:O14, N8:13, O8:13	[1:20, 34:20:294, 27:20:287, 268:273, 288:293]	LY294002	S1105	kinase	PI3K/Akt/mTOR	Autophagy,PI3K	307.34	154447-36-6	free base	LY294002 is the first synthetic molecule known to inhibit PI3Kα/δ/β with IC50 of 0.5 μM/0.57 μM/0.97 μM, respectively; more stable in solution than Wortmannin, and also blocks autophagosome formation.	C1=CC(=C2C(=C1)C(C=C(O2)N3CCOCC3)=O)C4=CC=CC=C4	117	http://www.selleckchem.com/products/LY294002.html
848	2132	L2000-01	a10	10	1	20170505	0	55	60		C15:20	A1:16, B:O7, B:O14, N8:13, O8:13	[1:20, 34:20:294, 27:20:287, 268:273, 288:293]	JNJ-38877605	S1114	kinase	Protein Tyrosine Kinase	c-Met	377.35	943540-75-8	free base	JNJ-38877605 is an ATP-competitive inhibitor of c-Met with IC50 of 4 nM, 600-fold selective for c-Met than 200 other tyrosine and serine-threonine kinases. Phase 1.	N1=CC=CC2=C1C=CC(=C2)C(C3N4C(=NN=3)C=CC(=N4)C5C=NN(C=5)C)(F)F	98	http://www.selleckchem.com/products/JNJ-38877605.html
849	2133	L2000-01	a11	11	1	20170505	0	35	40		B15:20	A1:16, B:O7, B:O14, N8:13, O8:13	[1:20, 34:20:294, 27:20:287, 268:273, 288:293]	AT9283	S1134	kinase	JAK/STAT	JAK,Aurora Kinase,Bcr-Abl	381.43	896466-04-9	free base	AT9283 is a potent JAK2/3 inhibitor with IC50 of 1.2 nM/1.1 nM; also potent to Aurora A/B, Abl(T315I). Phase 1/2.	N(C(=O)NC1C(=NNC=1)C2NC3C(N=2)=CC(=CC=3)CN4CCOCC4)C5CC5	199	http://www.selleckchem.com/products/AT9283.html
850	2134	L2000-01	b2	2	2	20170505	0	208	213		K8:13	A1:16, B:O7, B:O14, N8:13, O8:13	[1:20, 34:20:294, 27:20:287, 268:273, 288:293]	Axitinib	S1005	kinase	Protein Tyrosine Kinase	c-Kit,VEGFR,PDGFR	386.47	319460-85-0	free base	Axitinib is a multi-target inhibitor of VEGFR1, VEGFR2, VEGFR3, PDGFRβ and c-Kit with IC50 of 0.1 nM, 0.2 nM, 0.1-0.3 nM, 1.6 nM and 1.7 nM, respectively.	C1(=CC=CC=C1C(=O)NC)SC2=CC3=C(C=C2)C(=NN3)/C=C/C4=CC=CC=N4	108	http://www.selleckchem.com/products/Axitinib.html
851	2135	L2000-01	b3	3	2	20170505	0	188	193		J8:13	A1:16, B:O7, B:O14, N8:13, O8:13	[1:20, 34:20:294, 27:20:287, 268:273, 288:293]	Dovitinib (TKI-258, CHIR-258)	S1018	kinase	Angiogenesis	FGFR,FLT3,c-Kit,VEGFR,PDGFR	392.43	405169-16-6	citrate	Dovitinib (TKI258, CHIR258) is a multitargeted RTK inhibitor, mostly for class III (FLT3/c-Kit) with IC50 of 1 nM/2 nM, also potent to class IV (FGFR1/3) and class V (VEGFR1-4) RTKs with IC50 of 8-13 nM, less potent to InsR, EGFR, c-Met, EphA2, Tie2, IGF-1R and HER2. Phase 4.	C1=CC=C(C2=C1NC(C(=C2N)C3NC4=C(N=3)C=CC(=C4)N5CCN(CC5)C)=O)F	76	http://www.selleckchem.com/products/CHIR-258.html
852	2136	L2000-01	b4	4	2	20170505	0	168	173		I8:13	A1:16, B:O7, B:O14, N8:13, O8:13	[1:20, 34:20:294, 27:20:287, 268:273, 288:293]	Lapatinib (GW-572016) Ditosylate	S1028	kinase	Protein Tyrosine Kinase	HER2,EGFR	925.46	388082-77-7	ditosylat	Lapatinib Ditosylate (GW572016, GW2016) is a potent EGFR and ErbB2 inhibitor with IC50 of 10.8 and 9.2 nM, respectively.	C1(=C(C=C2C(=C1)N=CN=C2NC3=CC=C(C(=C3)Cl)OCC4=CC=CC(=C4)F)C5OC(=CC=5)CNCCS(=O)(C)=O).C6(=C(C=CC(=C6)S(O)(=O)=O)C).C7=C(C=CC(=C7)S(O)(=O)=O)C	199	http://www.selleckchem.com/products/Lapatinib-Ditosylate.html
853	2137	L2000-01	b5	5	2	20170505	0	148	153		H8:13	A1:16, B:O7, B:O14, N8:13, O8:13	[1:20, 34:20:294, 27:20:287, 268:273, 288:293]	Sorafenib Tosylate	S1040	kinase	MAPK	PDGFR,Raf,VEGFR	637.03	475207-59-1	tosylate	Sorafenib Tosylate (Bay 43-9006) is a multikinase inhibitor of Raf-1, B-Raf and VEGFR-2 with IC50 of 6 nM, 22 nM and 90 nM, respectively.	C1(=CC=C(C=C1C(F)(F)F)NC(NC2=CC=C(C=C2)OC3=CC=NC(=C3)C(NC)=O)=O)Cl.C4=CC(=CC=C4S(O)(=O)=O)C	199	http://www.selleckchem.com/products/Sorafenib-Tosylate.html
854	2138	L2000-01	b6	6	2	20170505	0	128	133		G8:13	A1:16, B:O7, B:O14, N8:13, O8:13	[1:20, 34:20:294, 27:20:287, 268:273, 288:293]	AC480 (BMS-599626)	S1056	kinase	Protein Tyrosine Kinase	HER2,EGFR	567.01	714971-09-2	free base	AC480 (BMS-599626) is a selective and efficacious inhibitor of HER1 and HER2 with IC50 of 20 nM and 30 nM, ~8-fold less potent to HER4, >100-fold to VEGFR2, c-Kit, Lck, MET etc. Phase 1.	C1(CN[C@@H](CO1)COC(NC2=CN3C(=C2C)C(=NC=N3)NC4=CC5=C(C=C4)N(N=C5)CC6=CC(=CC=C6)F)=O).Cl	199	http://www.selleckchem.com/products/BMS-599626.html
855	2139	L2000-01	b7	7	2	20170505	0	108	113		F8:13	A1:16, B:O7, B:O14, N8:13, O8:13	[1:20, 34:20:294, 27:20:287, 268:273, 288:293]	SB203580	S1076	kinase	MAPK	p38 MAPK	377.43	152121-47-6	free base	SB203580 is a p38 MAPK inhibitor with IC50 of 0.3-0.5 μM, 10-fold less sensitive to SAPK3(106T) and SAPK4(106T) and blocks PKB phosphorylation with IC50 of 3-5 μM.	N1=CC=C(C=C1)C2=C(N=C(N2)C3=CC=C(C=C3)S(C)=O)C4=CC=C(C=C4)F	198	http://www.selleckchem.com/products/SB-203580.html
856	2140	L2000-01	b8	8	2	20170505	0	88	93		E8:13	A1:16, B:O7, B:O14, N8:13, O8:13	[1:20, 34:20:294, 27:20:287, 268:273, 288:293]	GSK1904529A	S1093	kinase	Protein Tyrosine Kinase	IGF-1R	851.96	1089283-49-7	free base	GSK1904529A is a selective inhibitor of IGF-1R and IR with IC50 of 27 nM and 25 nM, >100-fold more selective for IGF-1R/InsR than Akt1/2, Aurora A/B,B-Raf, CDK2, EGFR etc.	C1=C(C(=C(C=C1)F)NC(C2=C(C=CC(=C2)C3=C(N4C(=N3)C=CC=C4)C5=CC=NC(=N5)NC6=C(C=C(C(=C6)CC)N7CCC(CC7)N8CCN(CC8)S(C)(=O)=O)OC)OC)=O)F	145	http://www.selleckchem.com/products/GSK1904529A.html
857	2141	L2000-01	b9	9	2	20170505	0	68	73		D8:13	A1:16, B:O7, B:O14, N8:13, O8:13	[1:20, 34:20:294, 27:20:287, 268:273, 288:293]	OSU-03012 (AR-12)	S1106	kinase	PI3K/Akt/mTOR	PDK-1	460.45	742112-33-0	free base	OSU-03012 is a potent inhibitor of recombinant PDK-1 with IC50 of 5 μM and 2-fold increase in potency over OSU-02067.	C12=C(C=CC3=C1C=CC(=C3)C4=CC(=NN4C5=CC=C(C=C5)NC(CN)=O)C(F)(F)F)C=CC=C2	23	http://www.selleckchem.com/products/OSU-03012.html
858	2142	L2000-01	b10	10	2	20170505	0	48	53		C8:13	A1:16, B:O7, B:O14, N8:13, O8:13	[1:20, 34:20:294, 27:20:287, 268:273, 288:293]	Palbociclib (PD-0332991) HCl	S1116	kinase	Cell Cycle	CDK	483.99	827022-32-2	hydrochloride	PD0332991 is a highly selective inhibitor of CDK4/6 with IC50 of 11 nM/16 nM. It shows no activity against CDK1/2/5, EGFR, FGFR, PDGFR, InsR, etc. Phase 2/3.	N1(=C(N=C2C(=C1)C(=C(C(N2C3CCCC3)=O)C(C)=O)C)NC4=NC=C(C=C4)N5CCNCC5).Cl	10	http://www.selleckchem.com/products/PD-0332991.html
859	2143	L2000-01	b11	11	2	20170505	0	28	33		B8:13	A1:16, B:O7, B:O14, N8:13, O8:13	[1:20, 34:20:294, 27:20:287, 268:273, 288:293]	Brivanib Alaninate (BMS-582664)	S1138	kinase	Protein Tyrosine Kinase	VEGFR,FGFR	441.46	649735-63-7	alaninate	Brivanib alaninate (BMS-582664) is the prodrug of BMS-540215, an ATP-competitive inhibitor against VEGFR2 with IC50 of 25 nM.	C12=C(C(=C(C=C1)OC3=NC=NN4C3=C(C(=C4)OC[C@@H](C)OC([C@@H](N)C)=O)C)F)C=C(N2)C	199	http://www.selleckchem.com/products/Brivanib-alaninate.html
860	2144	L2000-01	c2	2	3	20170505	0	201	206		K1:6	A1:16, B:O7, B:O14, N8:13, O8:13	[1:20, 34:20:294, 27:20:287, 268:273, 288:293]	Saracatinib (AZD0530)	S1006	kinase	Angiogenesis	Src,Bcr-Abl	542.03	379231-04-6	free base	Saracatinib (AZD0530) is a potent Src inhibitor with IC50 of 2.7 nM, and potent to c-Yes, Fyn, Lyn, Blk, Fgr and Lck; less active for Abl and EGFR (L858R and L861Q). Phase 1/2.	C1=C(C=C2C(=C1OC3CCOCC3)C(=NC=N2)NC4=C(C=CC5=C4OCO5)Cl)OCCN6CCN(CC6)C	184	http://www.selleckchem.com/products/AZD0530.html
861	2145	L2000-01	c3	3	3	20170505	0	181	186		J1:6	A1:16, B:O7, B:O14, N8:13, O8:13	[1:20, 34:20:294, 27:20:287, 268:273, 288:293]	Canertinib (CI-1033)	S1019	kinase	Protein Tyrosine Kinase	EGFR,HER2	485.94	267243-28-7	free base	Canertinib (CI-1033) is a pan-ErbB inhibitor for EGFR and ErbB2 with IC50 of 1.5 nM and 9.0 nM, no activity to PDGFR, FGFR, InsR, PKC, or CDK1/2/4. Phase 3.	C1(=C(C=C2C(=C1)C(=NC=N2)NC3=CC(=C(C=C3)F)Cl)OCCCN4CCOCC4)NC(C=C)=O	10	http://www.selleckchem.com/products/CI-1033(Canertinib).html
862	2146	L2000-01	c4	4	3	20170505	0	161	166		I1:6	A1:16, B:O7, B:O14, N8:13, O8:13	[1:20, 34:20:294, 27:20:287, 268:273, 288:293]	Motesanib Diphosphate (AMG-706)	S1032	kinase	Protein Tyrosine Kinase	VEGFR,PDGFR,c-Kit	569.44	857876-30-3	diphosphate	Motesanib Diphosphate (AMG-706) is a potent ATP-competitive inhibitor of VEGFR1/2/3 with IC50 of 2 nM/3 nM/6 nM, respectively; similar activity against Kit, ~10-fold more selective for VEGFR than PDGFR and Ret. Phase 1/2.	C1(=CN=CC=C1CNC2=C(C=CC=N2)C(=O)NC3=CC=C4C(=C3)NCC4(C)C).P(O)(=O)(O)O.P(O)(=O)(O)O	175	http://www.selleckchem.com/products/Motesanib-Diphosphate.html
863	2147	L2000-01	c5	5	3	20170505	0	141	146		H1:6	A1:16, B:O7, B:O14, N8:13, O8:13	[1:20, 34:20:294, 27:20:287, 268:273, 288:293]	Sunitinib Malate	S1042	kinase	Protein Tyrosine Kinase	VEGFR,PDGFR,c-Kit	532.56	341031-54-7	malate	Sunitinib Malate is a multi-targeted RTK inhibitor targeting VEGFR2 (Flk-1) and PDGFRβ with IC50 of 80 nM and 2 nM, and also inhibits c-Kit.	C1(=CC=C2C(=C1)/C(C(N2)=O)=C/C3NC(=C(C=3C)C(NCCN(CC)CC)=O)C)F.C(C[C@@H](C(O)=O)O)(O)=O	28	http://www.selleckchem.com/products/Sunitinib-Malate-(Sutent).html
864	2148	L2000-01	c6	6	3	20170505	0	121	126		G1:6	A1:16, B:O7, B:O14, N8:13, O8:13	[1:20, 34:20:294, 27:20:287, 268:273, 288:293]	Masitinib (AB1010)	S1064	kinase	Protein Tyrosine Kinase	PDGFR,c-Kit	498.64	790299-79-5	free base	Masitinib is a novel inhibitor for Kit and PDGFRα/β with IC50 of 200 nM and 540 nM/800 nM, weak inhibition to ABL and c-Fms. Phase 2/3.	C1(=C(C=C(C=C1)NC(=O)C2=CC=C(C=C2)CN3CCN(CC3)C)NC4=NC(=CS4)C5=CC=CN=C5)C	200	http://www.selleckchem.com/products/Masitinib-(AB1010).html
865	2149	L2000-01	c7	7	3	20170505	0	101	106		F1:6	A1:16, B:O7, B:O14, N8:13, O8:13	[1:20, 34:20:294, 27:20:287, 268:273, 288:293]	SB202190 (FHPI)	S1077	kinase	MAPK	p38 MAPK	331.34	152121-30-7	free base	SB202190 (FHPI) is a potent p38 MAPK inhibitor targeting p38α/β with IC50 of 50 nM/100 nM, sometimes used instead of SB 203580 to investigate potential roles for SAPK2a/p38 in vivo.	C1=C(C=CC(=C1)C2N=C(NC=2C3=CC=NC=C3)C4=CC=C(C=C4)O)F	199	http://www.selleckchem.com/products/SB-202190.html
866	2150	L2000-01	c8	8	3	20170505	0	81	86		E1:6	A1:16, B:O7, B:O14, N8:13, O8:13	[1:20, 34:20:294, 27:20:287, 268:273, 288:293]	PF-04217903	S1094	kinase	Protein Tyrosine Kinase	c-Met	372.38	956905-27-4	free base	PF-04217903 is a selective ATP-competitive c-Met inhibitor with IC50 of 4.8 nM, susceptible to oncogenic mutations (no activity to Y1230C mutant). Phase 1.	C12=CC=CN=C1C=CC(=C2)CN3C4=C(N=N3)N=CC(=N4)C5=CN(N=C5)CCO	13	http://www.selleckchem.com/products/PF-04217903.html
867	2151	L2000-01	c9	9	3	20170505	0	61	66		D1:6	A1:16, B:O7, B:O14, N8:13, O8:13	[1:20, 34:20:294, 27:20:287, 268:273, 288:293]	Danusertib (PHA-739358)	S1107	kinase	Cell Cycle	c-RET,FGFR,Bcr-Abl,Aurora Kinase	474.55	827318-97-8	free base	Danusertib (PHA-739358) is an Aurora kinase inhibitor for Aurora A/B/C with IC50 of 13 nM/79 nM/61 nM, modestly potent to Abl, TrkA, c-RET and FGFR1, and less potent to Lck, VEGFR2/3, c-Kit, CDK2, etc. Phase 2.	C1(=CC=CC=C1)[C@H](C(N2CC3=C(C2)C(=NN3)NC(=O)C4=CC=C(C=C4)N5CCN(CC5)C)=O)OC	200	http://www.selleckchem.com/products/PHA-739358(Danusertib).html
868	2152	L2000-01	c10	10	3	20170505	0	41	46		C1:6	A1:16, B:O7, B:O14, N8:13, O8:13	[1:20, 34:20:294, 27:20:287, 268:273, 288:293]	Triciribine	S1117	kinase	PI3K/Akt/mTOR	Akt	320.3	35943-35-2	free base	Triciribine is a DNA synthesis inhibitor, also inhibits Akt and HIV-1 with IC50 of 130 nM and 20 nM, respectively; does not inhibit PI3K/PDK1; 5000-fold less active in cells lacking adenosine kinase. Phase 1/2.	[C@H]1([C@@H]([C@H](O[C@@H]1N2C3=C4C(=C2)C(=NN(C4=NC=N3)C)N)CO)O)O	199	http://www.selleckchem.com/products/Triciribine.html
869	2153	L2000-01	c11	11	3	20170505	0	21	26		B1:6	A1:16, B:O7, B:O14, N8:13, O8:13	[1:20, 34:20:294, 27:20:287, 268:273, 288:293]	AG-490 (Tyrphostin B42)	S1143	kinase	Protein Tyrosine Kinase	JAK,EGFR	294.3	133550-30-8	free base	AG-490 (Tyrphostin B42) is an inhibitor of EGFR with IC50 of 0.1 μM, 135-fold more selective for EGFR versus ErbB2, also inhibits JAK2 with no activity to Lck, Lyn, Btk, Syk and Src.	C1(=C(C=CC(=C1)/C=C(/C(NCC2=CC=CC=C2)=O)C#N)O)O	200	http://www.selleckchem.com/products/AG-490.html
870	2154	L2000-01	d2	2	4	20170505	0	295	300		O15:20	A1:16, B:O7, B:O14, N8:13, O8:13	[1:20, 34:20:294, 27:20:287, 268:273, 288:293]	Selumetinib (AZD6244)	S1008	kinase	MAPK	MEK	457.68	606143-52-6	free base	Selumetinib (AZD6244) is a potent, highly selective MEK1 inhibitor with IC50 of 14 nM, also inhibits ERK1/2 phosphorylation with IC50 of 10 nM, no inhibition to p38α, MKK6, EGFR, ErbB2, ERK2, B-Raf, etc. Phase 1/2.	C1=C2C(=C(C(=C1C(NOCCO)=O)NC3=CC=C(C=C3Cl)Br)F)N=CN2C	201	http://www.selleckchem.com/products/AZD6244.html
871	2155	L2000-01	d3	3	4	20170505	0	275	280		M15:20	A1:16, B:O7, B:O14, N8:13, O8:13	[1:20, 34:20:294, 27:20:287, 268:273, 288:293]	PD184352 (CI-1040)	S1020	kinase	MAPK	MEK	478.67	212631-79-3	free base	CI-1040 (PD 184352) is an ATP non-competitive MEK1/2 inhibitor with IC50 of 17 nM, 100-fold more selective for MEK1/2 than MEK5. Phase 2.	C1=C(C(=C(C(=C1)C(NOCC2CC2)=O)NC3=CC=C(C=C3Cl)I)F)F	200	http://www.selleckchem.com/products/CI-1040-(PD184352).html
872	2156	L2000-01	d4	4	4	20170505	0	255	260		N15:20	A1:16, B:O7, B:O14, N8:13, O8:13	[1:20, 34:20:294, 27:20:287, 268:273, 288:293]	Nilotinib (AMN-107)	S1033	kinase	Angiogenesis	Bcr-Abl	529.52	641571-10-0	free base	Nilotinib (AMN-107) is a Bcr-Abl inhibitor with IC50 less than 30 nM.	C1(=CC=C(C(=C1)NC2=NC=CC(=N2)C3=CN=CC=C3)C)C(=O)NC4=CC(=CC(=C4)N5C=C(N=C5)C)C(F)(F)F	50	http://www.selleckchem.com/products/Nilotinib.html
873	2157	L2000-01	d5	5	4	20170505	0	235	240		L15:20	A1:16, B:O7, B:O14, N8:13, O8:13	[1:20, 34:20:294, 27:20:287, 268:273, 288:293]	Tandutinib (MLN518)	S1043	kinase	Angiogenesis	FLT3	562.7	387867-13-2	free base	Tandutinib (MLN518, CT53518) is a potent FLT3 antagonist with IC50 of 0.22 μM, also inhibits PDGFR and c-Kit, 15 to 20-fold higher potency for FLT3 versus CSF-1R and >100-fold selectivity for the same target versus FGFR, EGFR and KDR. Phase 1/2.	C1=C(C(=CC2=C1N=CN=C2N3CCN(CC3)C(NC4=CC=C(C=C4)OC(C)C)=O)OC)OCCCN5CCCCC5	10	http://www.selleckchem.com/products/Tandutinib-(MLN518).html
874	2158	L2000-01	d6	6	4	20170505	0	281	286		O1:6	A1:16, B:O7, B:O14, N8:13, O8:13	[1:20, 34:20:294, 27:20:287, 268:273, 288:293]	GDC-0941	S1065	kinase	PI3K/Akt/mTOR	PI3K	513.64	957054-30-7	free base	GDC-0941 is a potent inhibitor of PI3Kα/δ with IC50 of 3 nM, with modest selectivity against p110β (11-fold) and p110γ (25-fold).	C1(=CC=CC2=C1C=NN2)C3=NC(=C4C(=N3)C=C(S4)CN5CCN(CC5)S(=O)(=O)C)N6CCOCC6	85	http://www.selleckchem.com/products/GDC-0941.html
875	2159	L2000-01	d7	7	4	20170505	0	261	266		N1:6	A1:16, B:O7, B:O14, N8:13, O8:13	[1:20, 34:20:294, 27:20:287, 268:273, 288:293]	MK-2206 2HCl	S1078	kinase	PI3K/Akt/mTOR	Akt	480.39	1032350-13-2	dihydrochloride	MK-2206 2HCl is a highly selective inhibitor of Akt1/2/3 with IC50 of 8 nM/12 nM/65 nM, respectively; no inhibitory activities against 250 other protein kinases observed. Phase 2.	C1(=CC=CC=C1)C2(=C(N=C3C(=C2)C4N(C=C3)C(NN=4)=O)C5=CC=C(C=C5)C6(CCC6)N).Cl.Cl	29	http://www.selleckchem.com/products/MK-2206.html
876	2160	L2000-01	d8	8	4	20170505	0	241	246		M1:6	A1:16, B:O7, B:O14, N8:13, O8:13	[1:20, 34:20:294, 27:20:287, 268:273, 288:293]	MLN8054	S1100	kinase	Cell Cycle	Aurora Kinase	476.86	869363-13-3	free base	MLN8054 is a potent and selective inhibitor of Aurora A with IC50 of 4 nM. It is more than 40-fold selective for Aurora A than Aurora B. Phase 1.	C1=C(C=C2C(=C1)C3=C(CN=C2C4=C(C=CC=C4F)F)C=NC(=N3)NC5=CC=C(C=C5)C(=O)O)Cl	199	http://www.selleckchem.com/products/MLN8054.html
877	2161	L2000-01	d9	9	4	20170505	0	221	226		L1:6	A1:16, B:O7, B:O14, N8:13, O8:13	[1:20, 34:20:294, 27:20:287, 268:273, 288:293]	TAE684 (NVP-TAE684)	S1108	kinase	Protein Tyrosine Kinase	ALK	614.2	761439-42-3	free base	TAE684 is a potent and selective ALK inhibitor with IC50 of 3 nM, 100-fold more sensitive for ALK than InsR.	C1=CC(=CC(=C1NC2=NC=C(C(=N2)NC3=C(C=CC=C3)S(=O)(=O)C(C)C)Cl)OC)N4CCC(CC4)N5CCN(CC5)C	10	http://www.selleckchem.com/products/NVP-TAE684.html
878	2162	L2000-01	d10	10	4	20170505	0	248	253		M8:13	A1:16, B:O7, B:O14, N8:13, O8:13	[1:20, 34:20:294, 27:20:287, 268:273, 288:293]	XL147	S1118	kinase	PI3K/Akt/mTOR	PI3K	448.52	956958-53-5	free base	XL147 is a selective and reversible class I PI3K inhibitor for PI3Kα/δ/γ with IC50 of 39 nM/36 nM/23 nM, less potent to PI3Kβ. Phase 1/2.	C1=CC=C2C(=C1)N=C(C(=N2)NS(=O)(=O)C3=CC=C(C=C3)C)NC4=CC5C(C=C4)=NSN=5	10	http://www.selleckchem.com/products/XL147.html
879	2163	L2000-01	d11	11	4	20170505	0	228	233		L8:13	A1:16, B:O7, B:O14, N8:13, O8:13	[1:20, 34:20:294, 27:20:287, 268:273, 288:293]	SNS-032 (BMS-387032)	S1145	kinase	Cell Cycle	CDK	380.53	345627-80-7	free base	SNS-032 has firstly been described as a selective inhibitor of CDK2 with IC50 of 48 nM and is 10- and 20-fold selective over CDK1/CDK4. It is also found to be sensitive to CDK7/9 with IC50 of 62 nM/4 nM, with little effect on CDK6. Phase 1.	C1(=CN=C(O1)CSC2=CN=C(S2)NC(=O)C3CCNCC3)C(C)(C)C	199	http://www.selleckchem.com/products/SNS-032.html
880	2164	L2000-01	e2	2	5	20170505	1	215	220		K15:20	A1:16, B:O7, B:O14, N1:6, O1:6	[1:20, 34:20:294, 27:20:287, 261:266, 281:286]	BEZ235 (NVP-BEZ235, Dactolisib)	S1009	kinase	PI3K/Akt/mTOR	PI3K,ATM/ATR,mTOR	469.55	915019-65-7	free base	BEZ235 (NVP-BEZ235) is a dual ATP-competitive PI3K and mTOR inhibitor for p110α/γ/δ/β and mTOR(p70S6K) with IC50 of 4 nM/5 nM/7 nM/75 nM/6 nM, respectively. Inhibits ATR with IC50 of 21 nM; shown to be poor inhibitory to Akt and PDK1. Phase 1/2.	C12=CN=C3C(=C1N(C(N2C)=O)C4=CC=C(C=C4)C(C#N)(C)C)C=C(C=C3)C5=CC6=C(N=C5)C=CC=C6	10	http://www.selleckchem.com/products/BEZ235.html
881	2165	L2000-01	e3	3	5	20170505	1	195	200		J15:20	A1:16, B:O7, B:O14, N1:6, O1:6	[1:20, 34:20:294, 27:20:287, 261:266, 281:286]	Dasatinib	S1021	kinase	Angiogenesis	Bcr-Abl,c-Kit,Src	488.01	302962-49-8	free base	Dasatinib is a novel, potent and multi-targeted inhibitor that targets Abl, Src and c-Kit, with IC50 of ＜1 nM, 0.8 nM and 79 nM, respectively.	N1=C(N=C(C=C1NC2=NC=C(S2)C(NC3=C(C=CC=C3C)Cl)=O)N4CCN(CC4)CCO)C	200	http://www.selleckchem.com/products/Dasatinib.html
882	2166	L2000-01	e4	4	5	20170505	1	175	180		I15:20	A1:16, B:O7, B:O14, N1:6, O1:6	[1:20, 34:20:294, 27:20:287, 261:266, 281:286]	NVP-AEW541	S1034	kinase	Protein Tyrosine Kinase	IGF-1R	439.55	475489-16-8	free base	NVP-AEW541 is a potent inhibitor of IGF-1R with IC50 of 86 nM, 27-fold greater selectivity for IGF-1R than InsR.	C1=CC(=CC(=C1)OCC2=CC=CC=C2)C3=CN(C4=C3C(=NC=N4)N)[C@@H]5C[C@@H](C5)CN6CCC6	200	http://www.selleckchem.com/products/NVP-AEW541.html
883	2167	L2000-01	e5	5	5	20170505	1	155	160		H15:20	A1:16, B:O7, B:O14, N1:6, O1:6	[1:20, 34:20:294, 27:20:287, 261:266, 281:286]	Temsirolimus (CCI-779, NSC 683864)	S1044	kinase	PI3K/Akt/mTOR	mTOR	1030.29	162635-04-3	free base	Temsirolimus (CCI-779) is a specific mTOR inhibitor with IC50 of 1.76 μM.	[C@H]1(C[C@@H](CC[C@@H]1OC(C(CO)(CO)C)=O)C[C@H]([C@@H]2CC([C@@H](/C=C(/[C@H]([C@@H](OC)C([C@@H](C[C@@H](/C=C/C=C/C=C(/[C@H](C[C@]3(CC[C@H]([C@](C(C(N4[C@](C(O2)=O)(CCCC4)[H])=O)=O)(O3)O)C)[H])OC)C)C)C)=O)O)C)C)=O)C)OC	72	http://www.selleckchem.com/products/Temsirolimus.html
884	2168	L2000-01	e6	6	5	20170505	1	135	140		G15:20	A1:16, B:O7, B:O14, N1:6, O1:6	[1:20, 34:20:294, 27:20:287, 261:266, 281:286]	SL-327	S1066	kinase	MAPK	MEK	335.35	305350-87-2	free base	SL327 is a selective inhibitor for MEK1/2 with IC50 of 0.18 μM/ 0.22 μM, no activity towards Erk1, MKK3, MKK4, c-JUN, PKC, PKA, or CamKII;capable of transport through the blood-brain barrier.	C1=CC=CC(=C1C(F)(F)F)/C(=C(/SC2=CC=C(C=C2)N)N)C#N	11	http://www.selleckchem.com/products/SL327.html
885	2169	L2000-01	e7	7	5	20170505	1	115	120		F15:20	A1:16, B:O7, B:O14, N1:6, O1:6	[1:20, 34:20:294, 27:20:287, 261:266, 281:286]	SU11274	S1080	kinase	Protein Tyrosine Kinase	c-Met	568.09	658084-23-2	free base	SU11274 is a selective Met inhibitor with IC50 of 10 nM, no effects on PGDFRβ, EGFR or Tie2.	C1(=CC=CC(=C1)N(C)S(C2=CC3=C(C=C2)NC(C/3=C/C4NC(=C(C=4C)C(N5CCN(CC5)C)=O)C)=O)(=O)=O)Cl	161	http://www.selleckchem.com/products/SU11274.html
886	2170	L2000-01	e8	8	5	20170505	1	95	100		E15:20	A1:16, B:O7, B:O14, N1:6, O1:6	[1:20, 34:20:294, 27:20:287, 261:266, 281:286]	Vatalanib (PTK787) 2HCl	S1101	kinase	Protein Tyrosine Kinase	c-Kit,VEGFR	419.73	212141-51-0	dihydrochloride	Vatalanib (PTK787) is an inhibitor of VEGFR2/KDR with IC50 of 37 nM, less potent against VEGFR1/Flt-1, 18-fold against VEGFR3/Flt-4. Phase 1/2.	C1(=CC=C2C(=C1)C(=NN=C2CC3=CC=NC=C3)NC4=CC=C(C=C4)Cl).Cl.Cl	202	http://www.selleckchem.com/products/Vatalanib,Dihydrochloride-Salt.html
887	2171	L2000-01	e9	9	5	20170505	1	75	80		D15:20	A1:16, B:O7, B:O14, N1:6, O1:6	[1:20, 34:20:294, 27:20:287, 261:266, 281:286]	BI 2536	S1109	kinase	Cell Cycle	PLK	521.66	755038-02-9	free base	BI2536 is a potent Plk1 inhibitor with IC50 of 0.83 nM. It shows 4- and 11-fold greater selectivity against Plk2 and Plk3. Phase 2.	C1(=CC=C(C(=C1)OC)NC2=NC=C3C(=N2)N([C@@H](C(N3C)=O)CC)C4CCCC4)C(NC5CCN(CC5)C)=O	40	http://www.selleckchem.com/products/BI-2536.html
888	2172	L2000-01	e10	10	5	20170505	1	55	60		C15:20	A1:16, B:O7, B:O14, N1:6, O1:6	[1:20, 34:20:294, 27:20:287, 261:266, 281:286]	Cabozantinib (XL184, BMS-907351)	S1119	kinase	Protein Tyrosine Kinase	FLT3,Tie-2,c-Kit,c-Met,VEGFR,Axl	501.51	849217-68-1	free base	Cabozantinib (XL184, BMS-907351) is a potent VEGFR2 inhibitor with IC50 of 0.035 nM and also inhibits c-Met, Ret, Kit, Flt-1/3/4, Tie2, and AXL with IC50 of 1.3 nM, 4 nM, 4.6 nM, 12 nM/11.3 nM/6 nM, 14.3 nM and 7 nM, respectively.	C12=C(C(=CC=N1)OC3=CC=C(C=C3)NC(C4(C(NC5=CC=C(C=C5)F)=O)CC4)=O)C=C(C(=C2)OC)OC	199	http://www.selleckchem.com/products/XL184.html
889	2173	L2000-01	e11	11	5	20170505	1	35	40		B15:20	A1:16, B:O7, B:O14, N1:6, O1:6	[1:20, 34:20:294, 27:20:287, 261:266, 281:286]	Barasertib (AZD1152-HQPA)	S1147	kinase	Cell Cycle	Aurora Kinase	507.56	722544-51-6	free base	AZD1152-HQPA (Barasertib) is a highly selective Aurora B inhibitor with IC50 of 0.37 nM, ~100 fold more selective for Aurora B over Aurora A.	C1(=CC=C2C(=C1)N=CN=C2NC3NN=C(C=3)CC(NC4=CC=CC(=C4)F)=O)OCCCN(CCO)CC	200	http://www.selleckchem.com/products/AZD1152-HQPA.html
890	2174	L2000-01	f2	2	6	20170505	1	208	213		K8:13	A1:16, B:O7, B:O14, N1:6, O1:6	[1:20, 34:20:294, 27:20:287, 261:266, 281:286]	Nintedanib (BIBF 1120)	S1010	kinase	Protein Tyrosine Kinase	VEGFR,PDGFR,FGFR	539.62	656247-17-5	free base	Nintedanib (BIBF 1120) is a potent triple angiokinase inhibitor for VEGFR1/2/3, FGFR1/2/3 and PDGFRα/β with IC50 of 34 nM/13 nM/13 nM, 69 nM/37 nM/108 nM and 59 nM/65 nM. Phase 3.	C1=C(C=C2C(=C1)/C(C(N2)=O)=C(\C3=CC=CC=C3)NC4=CC=C(C=C4)N(C)C(CN5CCN(CC5)C)=O)C(OC)=O	11	http://www.selleckchem.com/products/BIBF1120.html
891	2175	L2000-01	f3	3	6	20170505	1	188	193		J8:13	A1:16, B:O7, B:O14, N1:6, O1:6	[1:20, 34:20:294, 27:20:287, 261:266, 281:286]	Ridaforolimus (Deforolimus, MK-8669)	S1022	kinase	PI3K/Akt/mTOR	mTOR	990.21	572924-54-0	free base	Ridaforolimus (Deforolimus) is a selective mTOR inhibitor with IC50 of 0.2 nM; while not classified as a prodrug, mTOR inhibition and FKBP12 binding is similar to rapamycin.	[C@H]1(C[C@@H](CC[C@@H]1OP(C)(=O)C)C[C@H]([C@@H]2CC([C@@H](/C=C(/[C@H]([C@@H](OC)C([C@@H](C[C@@H](/C=C/C=C/C=C(/[C@H](C[C@]3(CC[C@H]([C@](C(C(N4[C@](C(O2)=O)(CCCC4)[H])=O)=O)(O3)O)C)[H])OC)C)C)C)=O)O)C)C)=O)C)OC	199	http://www.selleckchem.com/products/Deforolimus.html
892	2176	L2000-01	f4	4	6	20170505	1	168	173		I8:13	A1:16, B:O7, B:O14, N1:6, O1:6	[1:20, 34:20:294, 27:20:287, 261:266, 281:286]	Pazopanib HCl (GW786034 HCl)	S1035	kinase	Protein Tyrosine Kinase	VEGFR,PDGFR,c-Kit	473.98	635702-64-6	hydrochloride	Pazopanib (GW786034) is a novel multi-target inhibitor of VEGFR1, VEGFR2, VEGFR3, PDGFR, FGFR, c-Kit and c-Fms with IC50 of 10 nM, 30 nM, 47 nM, 84 nM, 74 nM, 140 nM and 146 nM, respectively.	C1(=C(C(=CC(=C1)NC2=NC=CC(=N2)N(C3C=CC4C(C=3)=NN(C=4C)C)C)S(=O)(N)=O)C).Cl	35	http://www.selleckchem.com/products/Pazopanib-Hydrochloride.html
893	2177	L2000-01	f5	5	6	20170505	1	148	153		H8:13	A1:16, B:O7, B:O14, N1:6, O1:6	[1:20, 34:20:294, 27:20:287, 261:266, 281:286]	Vandetanib (ZD6474)	S1046	kinase	Protein Tyrosine Kinase	VEGFR	475.35	443913-73-3	free base	Vandetanib (ZD6474) is a potent inhibitor of VEGFR2 with IC50 of 40 nM.	C12=C(C(=NC=N1)NC3=C(C=C(C=C3)Br)F)C=C(C(=C2)OCC4CCN(CC4)C)OC	10	http://www.selleckchem.com/products/Vandetanib.html
894	2178	L2000-01	f6	6	6	20170505	1	128	133		G8:13	A1:16, B:O7, B:O14, N1:6, O1:6	[1:20, 34:20:294, 27:20:287, 261:266, 281:286]	Crizotinib (PF-02341066)	S1068	kinase	Protein Tyrosine Kinase	c-Met,ALK	450.34	877399-52-5	free base	PF-2341066 (Crizotinib) is a potent inhibitor of c-Met and ALK with IC50 of 11 nM and 24 nM, respectivley.	C1(=CC(=C(N=C1)N)O[C@@H](C2=C(C=CC(=C2Cl)F)Cl)C)C3=CN(N=C3)C4CCNCC4	19	http://www.selleckchem.com/products/PF-2341066.html
895	2179	L2000-01	f7	7	6	20170505	1	108	113		F8:13	A1:16, B:O7, B:O14, N1:6, O1:6	[1:20, 34:20:294, 27:20:287, 261:266, 281:286]	Brivanib (BMS-540215)	S1084	kinase	Protein Tyrosine Kinase	FGFR,VEGFR	370.38	649735-46-6	free base	Brivanib is an ATP-competitive inhibitor against VEGFR2 with IC50 of 25 nM, moderate potency against VEGFR-1 and FGFR-1, but >240-fold against PDGFR-β. Phase 3.	C12=C(C(=C(C=C1)OC3=NC=NN4C3=C(C(=C4)OC[C@@H](C)O)C)F)C=C(N2)C	199	http://www.selleckchem.com/products/Brivanib.html
896	2180	L2000-01	f8	8	6	20170505	1	88	93		E8:13	A1:16, B:O7, B:O14, N1:6, O1:6	[1:20, 34:20:294, 27:20:287, 261:266, 281:286]	U0126-EtOH	S1102	kinase	MAPK	MEK	426.56	1173097-76-1	ethanolat	U0126-EtOH is a highly selective inhibitor of MEK1/2 with IC50 of 0.07 μM/0.06 μM, 100-fold higher affinity for ΔN3-S218E/S222D MEK than PD098059.	C1(=CC=C(C(=C1)SC(/N)=C(\C(=C(\SC2=C(C=CC=C2)N)N)C#N)C#N)N).CCO	199	http://www.selleckchem.com/products/U0126.html
897	2181	L2000-01	f9	9	6	20170505	1	68	73		D8:13	A1:16, B:O7, B:O14, N1:6, O1:6	[1:20, 34:20:294, 27:20:287, 261:266, 281:286]	Foretinib (GSK1363089)	S1111	kinase	Protein Tyrosine Kinase	VEGFR,c-Met	632.65	849217-64-7	free base	Foretinib (GSK1363089) is an ATP-competitive inhibitor of HGFR and VEGFR, mostly for Met and KDR with IC50 of 0.4 nM and 0.9 nM. Less potent against Ron, Flt-1/3/4, Kit, PDGFRα/β and Tie-2, and little activity to FGFR1 and EGFR. Phase 2.	C1(=CC=C(C=C1)F)NC(C2(C(NC3=CC(=C(C=C3)OC4C5=C(N=CC=4)C=C(C(=C5)OC)OCCCN6CCOCC6)F)=O)CC2)=O	200	http://www.selleckchem.com/products/XL880(GSK1363089,EXEL-2880).html
898	2182	L2000-01	f10	10	6	20170505	1	48	53		C8:13	A1:16, B:O7, B:O14, N1:6, O1:6	[1:20, 34:20:294, 27:20:287, 261:266, 281:286]	Everolimus (RAD001)	S1120	kinase	PI3K/Akt/mTOR	mTOR	958.22	159351-69-6	free base	Everolimus (RAD001) is an mTOR inhibitor of FKBP12 with IC50 of 1.6-2.4 nM.	C(O)CO[C@H]1[C@@H](C[C@@H](CC1)C[C@@H]([C@H]2OC(=O)[C@@H]3CCCCN3C(=O)C([C@]4([C@@H](CC[C@H](O4)C[C@@H](/C(=C/C=C/C=C/[C@H](C[C@H](C([C@@H]([C@@H](O)/C(=C/[C@H](C(C2)=O)C)C)OC)=O)C)C)C)OC)C)O)=O)C)OC	31	http://www.selleckchem.com/products/Everolimus(RAD001).html
899	2183	L2000-01	f11	11	6	20170505	1	28	33		B8:13	A1:16, B:O7, B:O14, N1:6, O1:6	[1:20, 34:20:294, 27:20:287, 261:266, 281:286]	PLX-4720	S1152	kinase	MAPK	Raf	413.83	918505-84-7	free base	PLX4720 is a potent and selective inhibitor of B-RafV600E with IC50 of 13 nM, equally potent to c-Raf-1(Y340D and Y341D mutations), 10-fold selectivity for B-RafV600E than wild-type B-Raf.	C1(=CN=C2C(=C1)C(=CN2)C(=O)C3=C(C(=CC=C3F)NS(=O)(=O)CCC)F)Cl	200	http://www.selleckchem.com/products/PLX-4720.html
900	2184	L2000-01	g2	2	7	20170505	1	201	206		K1:6	A1:16, B:O7, B:O14, N1:6, O1:6	[1:20, 34:20:294, 27:20:287, 261:266, 281:286]	Afatinib (BIBW2992)	S1011	kinase	Protein Tyrosine Kinase	EGFR,HER2	485.94	439081-18-2	free base	Afatinib (BIBW2992) irreversibly inhibits EGFR/HER2 including EGFR(wt), EGFR(L858R), EGFR(L858R/T790M) and HER2 with IC50 of 0.5 nM, 0.4 nM, 10 nM and 14 nM, respectively; 100-fold more active against Gefitinib-resistant L858R-T790M EGFR mutant. Phase 3.	C1(=C(C=C(C=C1)NC2=NC=NC3=C2C=C(C(=C3)O[C@H]4CCOC4)NC(/C=C/CN(C)C)=O)Cl)F	199	http://www.selleckchem.com/products/BIBW2992.html
901	2185	L2000-01	g3	3	7	20170505	1	181	186		J1:6	A1:16, B:O7, B:O14, N1:6, O1:6	[1:20, 34:20:294, 27:20:287, 261:266, 281:286]	Erlotinib HCl (OSI-744)	S1023	kinase	Protein Tyrosine Kinase	Autophagy,EGFR	429.9	183319-69-9	hydrochloride	Erlotinib HCl (OSI-744) is an EGFR inhibitor with IC50 of 2 nM, >1000-fold more sensitive for EGFR than human c-Src or v-Abl. Phase 3.	C1(=CC=CC(=C1)C#C)NC2(=NC=NC3=C2C=C(C(=C3)OCCOC)OCCOC)C.Cl	10	http://www.selleckchem.com/products/Erlotinib-Hydrochloride.html
902	2186	L2000-01	g4	4	7	20170505	1	161	166		I1:6	A1:16, B:O7, B:O14, N1:6, O1:6	[1:20, 34:20:294, 27:20:287, 261:266, 281:286]	PD0325901	S1036	kinase	MAPK	MEK	482.19	391210-10-9	free base	PD0325901 (PD325901) is selective and non ATP-competitive MEK inhibitor with IC50 of 0.33 nM, roughly 500-fold more potent than CI-1040 on phosphorylation of ERK1 and ERK2. Phase 1/2.	C1=CC(=C(C(=C1C(=O)NOC[C@H](O)CO)NC2=CC=C(C=C2F)I)F)F	199	http://www.selleckchem.com/products/PD-0325901.html
903	2187	L2000-01	g5	5	7	20170505	1	141	146		H1:6	A1:16, B:O7, B:O14, N1:6, O1:6	[1:20, 34:20:294, 27:20:287, 261:266, 281:286]	VX-680 (Tozasertib, MK-0457)	S1048	kinase	Cell Cycle	Aurora Kinase	464.59	639089-54-6	free base	VX-680 (Tozasertib, MK-0457) is a pan-Aurora inhibitor, mostly against Aurora A with Kiapp of 0.6 nM, less potent towards Aurora B/Aurora C and 100-fold more selective for Aurora A than 55 other kinases. Phase 2.	C1(=CC(=NC(=N1)SC2=CC=C(C=C2)NC(=O)C3CC3)N4CCN(CC4)C)NC5C=C(NN=5)C	200	http://www.selleckchem.com/products/VX-680(MK-0457).html
904	2188	L2000-01	g6	6	7	20170505	1	121	126		G1:6	A1:16, B:O7, B:O14, N1:6, O1:6	[1:20, 34:20:294, 27:20:287, 261:266, 281:286]	PHA-665752	S1070	kinase	Protein Tyrosine Kinase	c-Met	641.61	477575-56-7	free base	PHA-665752 is a potent, selective and ATP-competitive c-Met inhibitor with IC50 of 9 nM, >50-fold selectivity for c-Met than RTKs or STKs.	C1=CC=C(C(=C1Cl)CS(C2=CC3=C(C=C2)NC(C/3=C/C4=C(C(=C(N4)C)C(N5[C@H](CCC5)CN6CCCC6)=O)C)=O)(=O)=O)Cl	199	http://www.selleckchem.com/products/PHA-665752.html
905	2189	L2000-01	g7	7	7	20170505	1	101	106		F1:6	A1:16, B:O7, B:O14, N1:6, O1:6	[1:20, 34:20:294, 27:20:287, 261:266, 281:286]	NVP-ADW742	S1088	kinase	Protein Tyrosine Kinase	IGF-1R	453.58	475488-23-4	free base	NVP-ADW742 is an IGF-1R inhibitor with IC50 of 0.17 μM, >16-fold more potent against IGF-1R than InsR; little activity to HER2, PDGFR, VEGFR-2, Bcr-Abl and c-Kit.	C12=C(N=CN=C1N)N(C=C2C3=CC(=CC=C3)OCC4=CC=CC=C4)[C@@H]5C[C@H](C5)CN6CCCC6	22	http://www.selleckchem.com/products/NVP-ADW742.html
906	2190	L2000-01	g8	8	7	20170505	1	81	86		E1:6	A1:16, B:O7, B:O14, N1:6, O1:6	[1:20, 34:20:294, 27:20:287, 261:266, 281:286]	ZM 447439	S1103	kinase	Cell Cycle	Aurora Kinase	513.59	331771-20-1	free base	ZM 447439 is a selective and ATP-competitive inhibitor for Aurora A and Aurora B with IC50 of 110 nM and 130 nM, respectively. It is more than 8-fold selective for Aurora A/B than MEK1, Src, Lck and has little effect againstCDK1/2/4, Plk1, Chk1, etc.	O1CCN(CC1)CCCOC2=C(C=C3C(=C2)N=CN=C3NC4=CC=C(C=C4)NC(=O)C5=CC=CC=C5)OC	200	http://www.selleckchem.com/products/ZM-447439.html
907	2191	L2000-01	g9	9	7	20170505	1	61	66		D1:6	A1:16, B:O7, B:O14, N1:6, O1:6	[1:20, 34:20:294, 27:20:287, 261:266, 281:286]	SGX-523	S1112	kinase	Protein Tyrosine Kinase	c-Met	359.41	1022150-57-7	free base	SGX-523 is a selective Met inhibitor with IC50 of 4 nM, no activity to BRAFV599E, c-Raf, Abl and p38α. Phase 1.	C1=C2C(=CC(=C1)SC3N4C(=NN=3)C=CC(=N4)C5C=NN(C=5)C)C=CC=N2	10	http://www.selleckchem.com/products/SGX-523.html
908	2192	L2000-01	g10	10	7	20170505	1	41	46		C1:6	A1:16, B:O7, B:O14, N1:6, O1:6	[1:20, 34:20:294, 27:20:287, 261:266, 281:286]	BMS-754807	S1124	kinase	Protein Tyrosine Kinase	IGF-1R,Trk receptor,c-Met	461.49	1001350-96-4	free base	BMS-754807 is a potent and reversible inhibitor of IGF-1R/InsR with IC50 of 1.8 nM/1.7 nM, less potent to Met, Aurora A/B, TrkA/B and Ron, and shows little activity to Flt3, Lck, MK2, PKA, PKC etc. Phase 1/2.	C12N(N=C(N=C1NC3C=C(NN=3)C4CC4)N5CCC[C@]5(C)C(=O)NC6=CC=C(N=C6)F)C=CC=2	199	http://www.selleckchem.com/products/BMS-754807.html
909	2193	L2000-01	g11	11	7	20170505	1	21	26		B1:6	A1:16, B:O7, B:O14, N1:6, O1:6	[1:20, 34:20:294, 27:20:287, 261:266, 281:286]	Roscovitine (Seliciclib,CYC202)	S1153	kinase	Cell Cycle	CDK	354.45	186692-46-6	free base	Roscovitine (Seliciclib, CYC202) is a potent and selective CDK inhibitor for Cdc2, CDK2 and CDK5 with IC50 of 0.65 μM, 0.7 μM and 0.16 μM. It shows little effect on CDK4/6. Phase 2.	N1=C2C(=C(N=C1N[C@@H](CO)CC)NCC3=CC=CC=C3)N=CN2C(C)C	200	http://www.selleckchem.com/products/Roscovitine.html
910	2194	L2000-01	h2	2	8	20170505	1	295	300		O15:20	A1:16, B:O7, B:O14, N1:6, O1:6	[1:20, 34:20:294, 27:20:287, 261:266, 281:286]	Bosutinib (SKI-606)	S1014	kinase	Angiogenesis	Src	530.45	380843-75-4	free base	Bosutinib (SKI-606) is a novel, dual Src/Abl inhibitor with IC50 of 1.2 nM and 1 nM, respectively.	N1=CC(=C(C2=CC(=C(C=C12)OCCCN3CCN(CC3)C)OC)NC4C(=CC(=C(C=4)OC)Cl)Cl)C#N	188	http://www.selleckchem.com/products/Bosutinib.html
911	2195	L2000-01	h3	3	8	20170505	1	275	280		M15:20	A1:16, B:O7, B:O14, N1:6, O1:6	[1:20, 34:20:294, 27:20:287, 261:266, 281:286]	Gefitinib (ZD1839)	S1025	kinase	Protein Tyrosine Kinase	EGFR	446.9	184475-35-2	free base	Gefitinib (ZD-1839) is an EGFR inhibitor for Tyr1173, Tyr992, Tyr1173 and Tyr992 in the NR6wtEGFR and NR6W cells with IC50 of 37 nM, 37nM, 26 nM and 57 nM, respectively.	C1(=C(C=C2C(=C1)N=CN=C2NC3=CC=C(C(=C3)Cl)F)OCCCN4CCOCC4)OC	199	http://www.selleckchem.com/products/Gefitinib.html
912	2196	L2000-01	h4	4	8	20170505	1	255	260		N15:20	A1:16, B:O7, B:O14, N1:6, O1:6	[1:20, 34:20:294, 27:20:287, 261:266, 281:286]	PI-103	S1038	kinase	PI3K/Akt/mTOR	PI3K,Autophagy,DNA-PK,mTOR	348.36	371935-74-9	free base	PI-103 is a multi-targeted PI3K inhibitor for p110α/β/δ/γ with IC50 of 2 nM/3 nM/3 nM/15 nM, less potent to mTOR/DNA-PK with IC50 of 30 nM/23 nM.	C12=C(N=C(N=C1N3CCOCC3)C4=CC=CC(=C4)O)C5=C(O2)N=CC=C5	68	http://www.selleckchem.com/products/PI-103.html
913	2197	L2000-01	h5	5	8	20170505	1	235	240		L15:20	A1:16, B:O7, B:O14, N1:6, O1:6	[1:20, 34:20:294, 27:20:287, 261:266, 281:286]	Y-27632 2HCl	S1049	kinase	Cell Cycle	Autophagy,ROCK	320.26	129830-38-2	dihydrochloric	Y-27632 2HCl is a selective ROCK1 (p160ROCK) inhibitor with Ki of 140 nM, exhibits >200-fold selectivity over other kinases, including PKC, cAMP-dependent protein kinase, MLCK and PAK.	[C@@H]1(CC[C@@H](CC1)[C@@H](C)N)C(=O)NC2(C=CN=CC=2).Cl.Cl	199	http://www.selleckchem.com/products/Y-27632.html
914	2198	L2000-01	h6	6	8	20170505	1	288	293		O8:13	A1:16, B:O7, B:O14, N1:6, O1:6	[1:20, 34:20:294, 27:20:287, 261:266, 281:286]	ZSTK474	S1072	kinase	PI3K/Akt/mTOR	PI3K	417.41	475110-96-4	free base	ZSTK474 inhibits class I PI3Kisoforms with IC50 of 37 nM, mostly PI3Kδ.	N1=C(N=C(N=C1N2CCOCC2)N3C4=C(N=C3C(F)F)C=CC=C4)N5CCOCC5	50	http://www.selleckchem.com/products/ZSTK474.html
915	2199	L2000-01	h7	7	8	20170505	1	268	273		N8:13	A1:16, B:O7, B:O14, N1:6, O1:6	[1:20, 34:20:294, 27:20:287, 261:266, 281:286]	OSI-906 (Linsitinib)	S1091	kinase	Protein Tyrosine Kinase	IGF-1R	421.49	867160-71-2	free base	OSI-906 (Linsitinib) is a selective inhibitor of IGF-1R with IC50 of 35 nM; modestly potent to InsR with IC50 of 75 nM, and no activity towards Abl, ALK, BTK, EGFR, FGFR1/2, PKA etc. Phase 3.	C1=C(C=C2C(=C1)C=CC(=N2)C3=CC=CC=C3)C4=C5N(C(=N4)[C@H]6C[C@@](C6)(C)O)C=CN=C5N	199	http://www.selleckchem.com/products/OSI-906.html
916	2200	L2000-01	h8	8	8	20170505	1	248	253		M8:13	A1:16, B:O7, B:O14, N1:6, O1:6	[1:20, 34:20:294, 27:20:287, 261:266, 281:286]	GDC-0879	S1104	kinase	MAPK	Raf	334.37	905281-76-7	free base	GDC-0879 is a novel, potent, and selective B-Raf inhibitor with IC50 of 0.13 nM with activity against c-Raf as well; no inhibition known to other protein kinases.	C(CN1N=C(C(=C1)C2=CC=C3C(=C2)CCC/3=N/O)C4C=CN=CC=4)O	200	http://www.selleckchem.com/products/GDC-0879.html
917	2201	L2000-01	h9	9	8	20170505	1	228	233		L8:13	A1:16, B:O7, B:O14, N1:6, O1:6	[1:20, 34:20:294, 27:20:287, 261:266, 281:286]	GSK690693	S1113	kinase	PI3K/Akt/mTOR	Akt	425.48	937174-76-0	free base	GSK690693 is a pan-Akt inhibitor targeting Akt1/2/3 with IC50 of 2 nM/13 nM/9 nM, also sensitive to the AGC kinase family: PKA, PrkX and PKC isozymes. Phase 1.	C12=C(C(=CN=C1C#CC(C)(O)C)OC[C@@H]3CNCCC3)N(C(=N2)C4C(=NON=4)N)CC	91	http://www.selleckchem.com/products/GSK690693.html
918	2202	L2000-01	h10	10	8	20170505	1	241	246		M1:6	A1:16, B:O7, B:O14, N1:6, O1:6	[1:20, 34:20:294, 27:20:287, 261:266, 281:286]	Alisertib (MLN8237)	S1133	kinase	Cell Cycle	Aurora Kinase	518.92	1028486-01-2	free base	Alisertib (MLN8237) is a selective Aurora A inhibitor with IC50 of 1.2 nM. It has >200-fold higher selectivity for Aurora A than Aurora B. Phase 3.	C1=CC=C(C(=C1OC)C2=NCC3=C(C4=C2C=C(C=C4)Cl)N=C(N=C3)NC5=CC(=C(C=C5)C(O)=O)OC)F	52	http://www.selleckchem.com/products/MLN8237.html
919	2203	L2000-01	h11	11	8	20170505	1	221	226		L1:6	A1:16, B:O7, B:O14, N1:6, O1:6	[1:20, 34:20:294, 27:20:287, 261:266, 281:286]	SNS-314 Mesylate	S1154	kinase	Cell Cycle	Aurora Kinase	527.04	1146618-41-8	mesylate	SNS-314 Mesylate is a potent and selective inhibitor of Aurora A, Aurora B and Aurora C with IC50 of 9 nM, 31 nM, and 3 nM, respectively. It is less potent to Trk A/B, Flt4, Fms, Axl, c-Raf and DDR2. Phase 1.	C12(=C(N=CN=C1NCCC3SC(=NC=3)NC(NC4=CC(=CC=C4)Cl)=O)C=CS2).CS(=O)(=O)O	199	http://www.selleckchem.com/products/SNS-314.html
920	2204	L2000-02	a2	2	1	20170508	0	215	220		K15:20	A1:16, B:O7, B:O14, N1:6, O1:6	[1:20, 34:20:294, 27:20:287, 261:266, 281:286]	Lenvatinib (E7080)	S1164	kinase	Protein Tyrosine Kinase	VEGFR	426.85	417716-92-8	free base	E7080 (Lenvatinib) is a multi-target inhibitor, mostly for VEGFR2(KDR)/VEGFR3(Flt-4) with IC50 of 4 nM/5.2 nM, less potent against VEGFR1/Flt-1, ~10-fold more selective for VEGFR2/3 against FGFR1, PDGFRα/β. Phase 3.	C1(=C(C=C2C(=C1)C(=CC=N2)OC3=CC(=C(C=C3)NC(=O)NC4CC4)Cl)OC)C(N)=O	93	http://www.selleckchem.com/products/E7080.html
921	2205	L2000-02	a3	3	1	20170508	0	195	200		J15:20	A1:16, B:O7, B:O14, N1:6, O1:6	[1:20, 34:20:294, 27:20:287, 261:266, 281:286]	WZ8040	S1179	kinase	Protein Tyrosine Kinase	EGFR	481.01	1214265-57-2	free base	WZ8040 is a novel mutant-selective irreversible EGFRT790M inhibitor, does not inhibit ERBB2 phosphorylation (T798I).	C1(=CC=C(C=C1)NC2=NC=C(C(=N2)SC3=CC(=CC=C3)NC(C=C)=O)Cl)N4CCN(CC4)C	199	http://www.selleckchem.com/products/WZ8040.html
922	2206	L2000-02	a4	4	1	20170508	0	175	180		I15:20	A1:16, B:O7, B:O14, N1:6, O1:6	[1:20, 34:20:294, 27:20:287, 261:266, 281:286]	AG-1024	S1234	kinase	Protein Tyrosine Kinase	IGF-1R	305.17	65678-07-1	free base	AG-1024 (Tyrphostin) inhibits IGF-1R autophosphorylation with IC50 of 7 μM, is less potent to IR with IC50 of 57 μM and specifically distinguishes between InsR and IGF-1R (as compared to other tyrphostins).	C(C(C#N)=CC1C=C(C(=C(C=1)C(C)(C)C)O)Br)#N	199	http://www.selleckchem.com/products/ag-1024-tyrphostin.html
923	2207	L2000-02	a5	5	1	20170508	0	155	160		H15:20	A1:16, B:O7, B:O14, N1:6, O1:6	[1:20, 34:20:294, 27:20:287, 261:266, 281:286]	Zoledronic Acid	S1314	kinase	Cell Cycle	Rac	272.09	118072-93-8	free base	Zoledronic acid induces apoptosis in osteoclasts by inhibiting enzymes of the mevalonate pathway and preventing the isoprenylation of small GTP-binding proteins such as Ras and Rho.	C1=NC=CN1CC(O)(P(=O)(O)O)P(=O)(O)O	10	http://www.selleckchem.com/products/Zoledronic-Acid.html
924	2208	L2000-02	a6	6	1	20170508	0	135	140		G15:20	A1:16, B:O7, B:O14, N1:6, O1:6	[1:20, 34:20:294, 27:20:287, 261:266, 281:286]	Pelitinib (EKB-569)	S1392	kinase	Protein Tyrosine Kinase	EGFR	467.92	257933-82-7	free base	Pelitinib (EKB-569) is a potent irreversible EGFR inhibitor with IC50 of 38.5 nM. Phase2.	C1(=C(C=C2C(=C1)N=CC(=C2NC3=CC(=C(C=C3)F)Cl)C#N)NC(/C=C/CN(C)C)=O)OCC	27	http://www.selleckchem.com/products/Pelitinib.html
925	2209	L2000-02	a7	7	1	20170508	0	115	120		F15:20	A1:16, B:O7, B:O14, N1:6, O1:6	[1:20, 34:20:294, 27:20:287, 261:266, 281:286]	GSK429286A	S1474	kinase	Cell Cycle	ROCK	432.37	864082-47-3	free base	GSK429286A is a selective inhibitor of ROCK1 and ROCK2 with IC50 of 14 nM and 63 nM, respectively.	C1(CC(C(=C(N1)C)C(NC2=C(C=C3C(=C2)C=NN3)F)=O)C4=CC=C(C=C4)C(F)(F)F)=O	201	http://www.selleckchem.com/products/GSK429286A.html
926	2210	L2000-02	a8	8	1	20170508	0	95	100		E15:20	A1:16, B:O7, B:O14, N1:6, O1:6	[1:20, 34:20:294, 27:20:287, 261:266, 281:286]	CCT129202	S1519	kinase	Cell Cycle	Aurora Kinase	497.02	942947-93-5	free base	CCT129202 is an ATP-competitive pan-Aurora inhibitor for Aurora A, Aurora B and Aurora C with IC50 of 0.042 μM, 0.198 μM and 0.227 μM, respectively. It is less potent to FGFR3, GSK3β, PDGFRβ, etc.	C1(=CN=C2C(=C1N3CCN(CC3)CC(NC4SC=CN=4)=O)N=C(N2)C5=CC=C(C=C5)N(C)C)Cl	10	http://www.selleckchem.com/products/CCT129202.html
927	2211	L2000-02	a9	9	1	20170508	0	75	80		D15:20	A1:16, B:O7, B:O14, N1:6, O1:6	[1:20, 34:20:294, 27:20:287, 261:266, 281:286]	R406 (free base)	S1533	kinase	Angiogenesis	Syk	470.45	841290-80-0	free base	R406 (free base) is a potent Syk inhibitor with IC50 of 41 nM, strongly inhibits Syk but not Lyn, 5-fold less potent to Flt3. Phase 2.	C1(=C(C=C(C=C1OC)NC2=NC(=C(C=N2)F)NC3=NC4=C(C=C3)OC(C(N4)=O)(C)C)OC)OC	44	http://www.selleckchem.com/products/R406(free-base).html
928	2212	L2000-02	a10	10	1	20170508	0	55	60		C15:20	A1:16, B:O7, B:O14, N1:6, O1:6	[1:20, 34:20:294, 27:20:287, 261:266, 281:286]	KU-60019	S1570	kinase	DNA Damage	ATM/ATR	547.67	925701-49-1	free base	KU-60019 is an improved analogue of KU-55933, with IC50 of 6.3 nM for ATM, 270- and 1600-fold more selective for ATM than DNA-PK and ATR,and is a highly effective radiosensitizer.	C1=C(C=CC2=C1CC3=C(S2)C(=CC=C3)C4=CC(C=C(O4)N5CCOCC5)=O)NC(CN6C[C@@H](O[C@@H](C6)C)C)=O	73	http://www.selleckchem.com/products/KU-60019.html
929	2213	L2000-02	a11	11	1	20170508	0	35	40		B15:20	A1:16, B:O7, B:O14, N1:6, O1:6	[1:20, 34:20:294, 27:20:287, 261:266, 281:286]	PF-573228	S2013	kinase	Angiogenesis	FAK	491.49	869288-64-2	free base	PF-573228 is an ATP-competitive inhibitor of FAK with IC50 of 4 nM, ~50- to 250-fold selective for FAK than Pyk2, CDK1/7 and GSK-3β.	N1C(CCC2C=C(C=CC1=2)NC3N=C(C(=CN=3)C(F)(F)F)NCC4C=C(C=CC=4)S(=O)(=O)C)=O	52	http://www.selleckchem.com/products/pf-573228.html
930	2214	L2000-02	b2	2	2	20170508	0	208	213		K8:13	A1:16, B:O7, B:O14, N1:6, O1:6	[1:20, 34:20:294, 27:20:287, 261:266, 281:286]	CP-724714	S1167	kinase	Protein Tyrosine Kinase	EGFR,HER2	469.53	537705-08-1	free base	CP-724,714 is a potent, selective inhibitor of HER2/ErbB2 with IC50 of 10 nM, >640-fold selectivity against EGFR, InsR, IRG-1R, PDGFR, VEGFR2, Abl, Src, c-Met etc. Phase 2.	C1(=CC=C2C(=C1)C(=NC=N2)NC3=CC=C(C(=C3)C)OC4=CC=C(N=C4)C)/C=C/CNC(COC)=O	200	http://www.selleckchem.com/products/CP-724714.html
931	2215	L2000-02	b3	3	2	20170508	0	188	193		J8:13	A1:16, B:O7, B:O14, N1:6, O1:6	[1:20, 34:20:294, 27:20:287, 261:266, 281:286]	ENMD-2076	S1181	kinase	Angiogenesis	Aurora Kinase,FLT3,VEGFR	375.47	934353-76-1	tartaric acid	ENMD-2076 has selective activity against Aurora A and Flt3 with IC50 of 14 nM and 1.86 nM, 25-fold selective for Aurora A than over Aurora B and less potent to VEGFR2/KDR and VEGFR3, FGFR1 and FGFR2 and PDGFRα. Phase 2.	C1(N=C(C=C(N=1)N2CCN(CC2)C)NC3=NNC(=C3)C)/C=C/C4C=CC=CC=4	279	http://www.selleckchem.com/products/ENMD-2076.html
932	2216	L2000-02	b4	4	2	20170508	0	168	173		I8:13	A1:16, B:O7, B:O14, N1:6, O1:6	[1:20, 34:20:294, 27:20:287, 261:266, 281:286]	Amuvatinib (MP-470)	S1244	kinase	Protein Tyrosine Kinase	FLT3,c-RET,PDGFR,c-Kit	447.51	850879-09-3	free base	Amuvatinib (MP-470) is a potent and multi-targeted inhibitor of c-Kit, PDGFRα and Flt3 with IC50 of 10 nM, 40 nM and 81 nM, respectively. Phase 2.	C1=CC=C2C(=C1)C3=C(O2)C(=NC=N3)N4CCN(CC4)C(=S)NCC5=CC=C6C(=C5)OCO6	71	http://www.selleckchem.com/products/MP-470.html
933	2217	L2000-02	b5	5	2	20170508	0	148	153		H8:13	A1:16, B:O7, B:O14, N1:6, O1:6	[1:20, 34:20:294, 27:20:287, 261:266, 281:286]	Genistein	S1342	kinase	Protein Tyrosine Kinase	Topoisomerase,EGFR	270.24	446-72-0	free base	Genistein, a phytoestrogen found in soy products, is a highly specific inhibitor of protein tyrosine kinase (PTK) which blocks the mitogenic effect mediated by EGF on NIH-3T3 cells with IC50 of 12μM or by insulin with IC50 of 19 μM.	C1(=CC2=C(C(=C1)O)C(C(=CO2)C3=CC=C(C=C3)O)=O)O	199	http://www.selleckchem.com/products/Genistein.html
934	2218	L2000-02	b6	6	2	20170508	0	128	133		G8:13	A1:16, B:O7, B:O14, N1:6, O1:6	[1:20, 34:20:294, 27:20:287, 261:266, 281:286]	Aurora A Inhibitor I	S1451	kinase	Cell Cycle	Aurora Kinase	588.07	1158838-45-9	free base	Aurora A Inhibitor I is a novel, potent, and selective inhibitor of Aurora A with IC50 of 3.4 nM. It is 1000-fold more selective for Aurora A than Aurora B.	N1=CC(=C(N=C1NC2=CC=C(C=C2)CC(N3CCN(CC3)CC)=O)NC4=CC=C(C=C4)C(NC5=CC=CC=C5Cl)=O)F	200	http://www.selleckchem.com/products/Aurora-A-Inhibitor-I.html
935	2219	L2000-02	b7	7	2	20170508	0	108	113		F8:13	A1:16, B:O7, B:O14, N1:6, O1:6	[1:20, 34:20:294, 27:20:287, 261:266, 281:286]	Pimasertib (AS-703026)	S1475	kinase	MAPK	MEK	431.2	1236699-92-5	free base	AS-703026 is a highly selective, potent, ATP non-competitive allosteric inhibitor of MEK1/2 with IC50 of 5 nM-2 μM in MM cell lines. Phase 1/2.	C1=C(C=CC(=C1F)NC2=CN=CC=C2C(NC[C@@H](CO)O)=O)I	199	http://www.selleckchem.com/products/AS703026.html
936	2220	L2000-02	b8	8	2	20170508	0	88	93		E8:13	A1:16, B:O7, B:O14, N1:6, O1:6	[1:20, 34:20:294, 27:20:287, 261:266, 281:286]	SAR245409 (XL765)	S1523	kinase	PI3K/Akt/mTOR	PI3K,mTOR	599.66	1349796-36-6	free base	SAR245409 (XL765) is a dual inhibitor of mTOR/PI3K, mostly for p110γ with IC50 of 9 nM; also inhibits DNA-PK and mTOR. Phase 1/2.	C12=CC=CC=C1N=C(C(=N2)NC3=CC(=CC(=C3)OC)OC)NS(C4=CC=C(C=C4)NC(=O)C5=CC=C(C(=C5)OC)C)(=O)=O	20	http://www.selleckchem.com/products/XL765(SAR245409).html#
937	2221	L2000-02	b9	9	2	20170508	0	68	73		D8:13	A1:16, B:O7, B:O14, N1:6, O1:6	[1:20, 34:20:294, 27:20:287, 261:266, 281:286]	CP-673451	S1536	kinase	Protein Tyrosine Kinase	PDGFR	417.5	343787-29-1	free base	CP 673451 is a selective inhibitor of PDGFRα/β with IC50 of 10 nM/1 nM, exhibits >450-fold selectivity over other angiogenic receptors, has antiangiogenic and antitumor activity.	C1=CC(=C2C(=C1)C=CC(=N2)N3C4=CC=C(C=C4N=C3)OCCOC)N5CCC(CC5)N	100	http://www.selleckchem.com/products/CP-673451.html
938	2222	L2000-02	b10	10	2	20170508	0	48	53		C8:13	A1:16, B:O7, B:O14, N1:6, O1:6	[1:20, 34:20:294, 27:20:287, 261:266, 281:286]	BS-181 HCl	S1572	kinase	Cell Cycle	CDK	416.99	1397219-81-6	hydrochloride	BS-181 is a highly selective CDK7 inhibitor with IC50 of 21 nM. It is more than 40-fold selective for CDK7 than CDK1, 2, 4, 5, 6, or 9.	C1(=CC(=NC2N1N=CC=2C(C)C)NCCCCCCN)NCC3(=CC=CC=C3).Cl	199	http://www.selleckchem.com/products/BS-181.html
939	2223	L2000-02	b11	11	2	20170508	0	28	33		B8:13	A1:16, B:O7, B:O14, N1:6, O1:6	[1:20, 34:20:294, 27:20:287, 261:266, 281:286]	BMS-265246	S2014	kinase	Cell Cycle	CDK	345.34	582315-72-8	free base	BMS-265246 is a potent and selective CDK1/2 inhibitor with IC50 of 6 nM/9 nM. It is 25-fold more selective for CDK1/2 than CDK4.	C(=O)(C1C(=CC(=CC=1F)C)F)C2C(=C3C(=NC=2)NN=C3)OCCCC	57	http://www.selleckchem.com/products/bms-265246.html
940	2224	L2000-02	c2	2	3	20170508	0	201	206		K1:6	A1:16, B:O7, B:O14, N1:6, O1:6	[1:20, 34:20:294, 27:20:287, 261:266, 281:286]	TGX-221	S1169	kinase	PI3K/Akt/mTOR	PI3K	364.44	663619-89-4	free base	TGX-221 is a p110β-specific inhibitor with IC50 of 5 nM, 1000-fold more selective for p110β than p110α.	C1=C(C=C(C2N1C(C=C(N=2)N3CCOCC3)=O)C(C)NC4=CC=CC=C4)C	32	http://www.selleckchem.com/products/TGX-221.html
941	2225	L2000-02	c3	3	3	20170508	0	181	186		J1:6	A1:16, B:O7, B:O14, N1:6, O1:6	[1:20, 34:20:294, 27:20:287, 261:266, 281:286]	CUDC-101	S1194	kinase	Epigenetics	HDAC,HER2,EGFR	434.49	1012054-59-9	free base	CUDC-101 is a potent multi-targeted inhibitor against HDAC, EGFR and HER2 with IC50 of 4.4 nM, 2.4 nM, and 15.7 nM, and inhibits class I/II HDACs, but not class III, Sir-type HDACs. Phase 1.	C12=C(N=CN=C1NC3=CC(=CC=C3)C#C)C=C(C(=C2)OCCCCCCC(NO)=O)OC	46	http://www.selleckchem.com/products/CUDC-101.html
942	2226	L2000-02	c4	4	3	20170508	0	161	166		I1:6	A1:16, B:O7, B:O14, N1:6, O1:6	[1:20, 34:20:294, 27:20:287, 261:266, 281:286]	JNJ-7706621	S1249	kinase	Cell Cycle	CDK,Aurora Kinase	394.36	443797-96-4	free base	JNJ-7706621 is pan-CDK inhibitor with the highest potency on CDK1/2 with IC50 of 9 nM/4 nM and showing >6-fold selectivity for CDK1/2 than CDK3/4/6. It also potently inhibits Aurora A/B and has no activity on Plk1 and Wee1.	C1(=CC=C(C=C1)NC2N=C(N(N=2)C(C3=C(C=CC=C3F)F)=O)N)S(N)(=O)=O	200	http://www.selleckchem.com/products/JNJ-7706621.html
943	2227	L2000-02	c5	5	3	20170508	0	141	146		H1:6	A1:16, B:O7, B:O14, N1:6, O1:6	[1:20, 34:20:294, 27:20:287, 261:266, 281:286]	TG100-115	S1352	kinase	PI3K/Akt/mTOR	PI3K	346.34	677297-51-7	free base	TG100115 is a PI3Kγ/δ inhibitor with IC50 of 83 nM/235 nM, with little effect on PI3Kα/β. Phase 1/2.	C1(=C(N=C2C(=N1)C(=NC(=N2)N)N)C3=CC=CC(=C3)O)C4=CC(=CC=C4)O	25	http://www.selleckchem.com/products/TG100-115.html
944	2228	L2000-02	c6	6	3	20170508	0	121	126		G1:6	A1:16, B:O7, B:O14, N1:6, O1:6	[1:20, 34:20:294, 27:20:287, 261:266, 281:286]	PHA-680632	S1454	kinase	Cell Cycle	Aurora Kinase	501.62	398493-79-3	free base	PHA-680632 is potent inhibitor of Aurora A, Aurora B and Aurora C with IC50 of 27 nM, 135 nM and 120 nM, respectively. It has 10- to 200-fold higher IC50 for FGFR1, FLT3, LCK, PLK1, STLK2, and VEGFR2/3.	C1(=CC=C(C=C1)C(=O)NC2C3=C(NN=2)CN(C3)C(=O)NC4=C(C=CC=C4CC)CC)N5CCN(CC5)C	199	http://www.selleckchem.com/products/PHA-680632.html
945	2229	L2000-02	c7	7	3	20170508	0	101	106		F1:6	A1:16, B:O7, B:O14, N1:6, O1:6	[1:20, 34:20:294, 27:20:287, 261:266, 281:286]	HMN-214	S1485	kinase	Cell Cycle	PLK	424.47	173529-46-9	free base	HMN-214 is a prodrug of HMN-176, which alters the cellular spatial orientation of Plk1.	C1=CC=CC(=C1N(S(C2=CC=C(C=C2)OC)(=O)=O)C(C)=O)/C=C/C3=CC=[N+](C=C3)[O-]	28	http://www.selleckchem.com/products/HMN-214.html
[truncated: 1,008 more rows]
