# Supplementary material for: Functional and pharmacological analyses of visual habituation learning in larval zebrafish
Source: bioRxiv preprint, doi:10.1101/2022.06.17.496451, version 3 (2023-05-03)
Supplement: Supplemental Data 3 [file 496451_file04.xlsx]

## Sheet: Figure3_sourcedata3_Behavioural
SSMD Fingerprint Paramter Name	IU1	Artemisinin	Meropenem	Marbofloxacin	Sulfameter	Amorolfine HCl	Adefovir Dipivoxil	Rifampin	E-64	Fluconazole	Stavudine (d4T)	Cephalexin	Chloramphenicol	Zalcitabine	Sulfadiazine	Chloroxine	Loxistatin Acid (E-64C)	Gatifloxacin	Tenofovir Disoproxil Fumarate	Aztreonam	Erythromycin	Flurbiprofen	Oxytetracycline (Terramycin)	Aloxistatin	Tenofovir	Natamycin	Amphotericin B	Sulfanilamide	Rifabutin	Ethionamide	Valaciclovir HCl	Batimastat (BB-94)	Trelagliptin	BMS-707035	Tigecycline	Cefdinir	Albendazole	Praziquantel	Nevirapine	Trifluridine	Ganciclovir	Ilomastat (GM6001, Galardin)	NSC 405020	Cefoselis Sulfate	Linezolid	Nitrofural	Didanosine	Enoxacin	Vidarabine
Prob-Naive	0.255068	0.255068	0.549165	0.0252368	0.0310568	-0.839918	-0.141027	0.255068	0.0310568	0.549165	-0.0197488	0.0310568	0.255068	0.549165	0.549165	-1.59036	-0.483799	-0.133739	0.255068	0.549165	0.549165	-0.633174	-0.172334	-0.141027	-0.311254	0.255068	0.255068	0.549165	-0.423057	0.0310568	-0.311254	0.291613	0.24836	-0.196738	0.748162	0.291613	0.0959826	0.291613	0.238652	0.493167	-0.341492	-0.198719	-3.49402	0.0774203	-0.341492	0.493167	-0.0542106	-0.265632	0.493167
Prob-Train	1.06518	-0.0076298	0.694008	0.352292	0.541765	-2.42449	0.143217	0.377061	0.538094	0.787745	0.842272	0.761691	1.04191	0.0485582	0.821118	-2.22474	-0.0693939	0.202298	-0.186181	0.115482	0.532355	-0.723126	0.814457	0.0250368	0.363489	0.46928	0.132976	0.793697	0.920589	0.413775	-0.181025	-0.10161	0.0442053	-0.645001	0.250235	0.113474	0.193167	0.154394	0.0721142	0.488202	0.0653751	-0.378418	-2.52305	0.214433	0.197968	0.166912	-0.08812	-0.227722	0.717447
Prob-Test	0.992	-0.096814	0.7088	0.273154	0.0480774	-1.46396	-0.12194	0.321929	0.872275	0.118219	0.393687	0.68351	0.562248	0.397091	0.0907774	-1.44273	0.174	0.206845	0.368705	0.412259	0.272091	-1.06781	0.0141921	-0.261653	0.310795	0.768958	0.187307	1.0497	0.0298975	0.493442	0.322397	-0.0768707	0.0525947	-1.85245	0.152527	-0.153129	-1.68532	0.0356122	0.313462	0.328757	0.0498786	0.0353275	-1.66997	0.185045	0.440715	-0.0909657	0.13298	-0.106653	0.677951
TwoMvmt-Naive	0.443758	0.0626857	0.529958	0.25917	-0.398384	-0.18206	-0.959433	0.157595	-0.159351	-0.341715	-0.487452	-0.200727	0.237791	-0.158688	0.0469661	-1.07364	-0.313577	-0.376005	0.177916	-0.124593	0.212171	0.0960185	0.0881516	-0.428919	-0.0671535	0.106909	-0.324244	-0.387247	0.124184	0.0460009	-0.435879	-0.0647074	-0.603231	0.733474	0.361824	0.664391	0.0872814	0.275252	0.463902	-0.410645	-0.217948	-0.0443926	-0.259073	-0.194881	-0.213004	-0.0278401	0.22071	-0.226078	0.132028
TwoMvmt-Train	0.533548	0.338356	0.565785	0.0632393	0.10438	0.0271564	-0.281458	-0.13875	-0.113832	0.335862	-0.308117	0.587323	0.212977	-0.264121	-0.0206423	-0.275334	-0.401586	-0.396028	0.22011	-0.211418	-0.0209555	0.484955	0.0567917	-0.360763	-0.116342	0.262131	-0.278526	0.431139	-0.122916	-0.142358	-0.320922	0.0637956	-0.118595	0.122454	0.476956	-0.158685	0.31628	1.1397	0.692341	0.586968	0.0312116	-0.0141406	-0.00668338	-0.0170721	0.0443142	-0.112544	0.420609	-0.375557	0.337144
TwoMvmt-Test	0.738424	0.418283	0.674515	-0.0906375	0.019114	-0.93416	-0.5688	-0.151219	0.38557	-0.233303	-0.450843	0.767584	0.116865	-0.107699	-0.413012	-0.93416	0.496248	-0.327517	-0.167901	0.0589966	-0.144319	-0.303757	0.53484	-0.171052	0.241401	0.48348	-0.129051	0.234873	-0.580833	0.546284	-0.352084	-0.665431	-0.416399	-0.883291	-0.156916	-0.416891	1.06345	0.612752	-0.246169	-0.0435844	0.155936	0.117549	0.72222	-0.360327	-0.643065	0.2013	0.427279	-0.493433	0.105349
Lat-Naive	0.718261	0.285778	0.337966	-0.064191	0.228484	-2.24556	0.563145	0.0282679	0.142366	0.466275	0.550007	0.583545	0.00585968	0.0250755	0.497854	-0.262277	-0.244401	0.273004	0.113896	-0.598895	0.0130322	0.0145122	0.663828	-0.448587	0.140257	0.425494	0.275826	0.205815	-0.0845652	0.116731	-0.446882	0.00735203	-0.00312958	-0.437764	-0.13429	0.158602	-0.39245	-0.318343	0.587897	0.0210922	-0.337103	0.338738	-0.961994	-0.378565	-0.294839	0.0246873	-0.29067	-0.277847	0.0452711
Lat-Train	1.05945	0.172665	0.105986	0.0949941	0.292624	-0.373747	0.217127	-0.247608	1.20034	0.586591	0.456037	0.690597	0.67461	0.446664	0.508686	-1.38216	-0.185186	0.208253	-0.276377	-0.211628	-0.0569847	-0.390231	0.53355	-0.194056	0.266341	-0.00625719	0.527402	1.03248	0.0936382	0.305941	-0.465835	-0.253559	-0.1723	-0.524921	0.178579	0.177495	-2.07273	-0.478323	0.0423335	0.33611	-0.332404	-0.437969	-0.87555	0.228088	0.711372	0.193984	-0.421766	-0.264532	0.615241
Lat-Test	0.719267	0.349865	0.116597	0.180972	0.330204	-2.44474	-0.314564	0.275099	0.803951	0.503124	0.230832	0.297051	0.483475	0.654131	0.416105	1.01159	0.176903	-0.0561329	0.0761833	0.204282	0.574637	-0.532799	0.727997	0.301333	0.248965	-0.221072	0.597998	0.665664	-0.0809566	0.29984	0.096659	-0.207522	0.183922	-0.36845	-0.0421649	-0.0474204	-1.13342	-0.109515	0.313716	0.036212	-0.494744	0.0612012	-0.793985	-0.0655051	0.314737	0.496034	-0.179471	0.174001	0.347772
Disp-Naive	0.445506	0.375758	-0.0487719	-0.149202	0.231032	-0.405381	-0.0682725	-0.0959318	0.224805	0.526504	-0.00860072	0.0804228	-0.259882	-0.569625	0.297679	0.470782	0.553532	-0.0731469	0.0150125	-0.236934	0.356053	0.505659	0.098663	-0.0170619	0.514742	0.396803	0.19952	-0.0524242	-0.541658	0.0114118	-0.295187	-0.484031	0.00684385	-0.485519	0.290477	0.265677	0.210222	-0.509264	-0.0135297	-0.0117062	-0.0773812	0.533245	-1.67601	0.228873	0.104504	0.259058	0.0193157	-0.192876	-0.0837489
Disp-Train	-0.0121035	0.313271	0.11229	-0.0897583	0.536556	-1.02288	-0.129895	-0.292505	0.232645	0.536923	0.10669	0.410127	-0.444332	0.464655	-0.00549679	-0.238614	-0.0308086	-0.437401	0.236733	0.311503	-0.101963	2.27642	-0.466438	0.031098	0.450154	-0.291495	-0.0211922	-0.113842	-0.0826592	-0.302882	-0.211526	0.448704	0.336429	-0.561995	0.214689	0.0681425	-0.538396	-0.791448	-0.266483	-0.316441	-0.194374	0.470833	-0.641331	0.3093	0.547949	0.255855	0.408499	0.304877	-0.22085
Disp-Test	0.149587	0.50412	-0.264591	-0.165081	0.38667	-4.00001	-0.0262247	0.0188794	0.439011	0.446225	0.156427	0.123617	0.232993	0.377375	0.117549	3.21586	0.059664	-0.431092	-0.275491	-0.179362	-0.0700218	1.05632	-0.45025	0.292103	0.0950253	-0.217862	-0.028504	0.00365968	0.431099	-0.427895	0.0342453	0.259827	0.243052	0.987502	-0.145977	0.0406097	-1.16606	-0.630425	-0.361416	-0.118133	-0.409566	0.303846	0.685797	-0.110774	0.136707	0.113329	0.387972	0.390325	-0.503113
Dur-Naive	0.0885417	0.346504	-0.00754635	-0.545115	0.155002	-0.306133	-0.541519	0.149935	-0.470025	0.109135	0.427014	0.223602	-0.631717	-0.63691	-0.122896	-0.721541	0.413841	-0.197094	0.181565	0.439383	-0.546108	-0.247217	-0.201708	0.17631	0.157247	-0.0489957	-0.190366	-0.0421419	-0.408489	-0.183308	-0.426045	-0.25166	0.0672535	0.140185	0.194926	-0.00515208	0.634612	0.287843	-0.230101	0.197537	0.121764	0.169135	-0.443002	-0.161002	-0.013727	-0.00525274	0.013196	0.24187	0.156153
Dur-Train	-0.0463608	0.0946411	0.604499	0.00558375	0.0949395	-0.81496	0.184949	0.0193574	-0.00997679	0.308142	-0.34611	-0.178881	-0.0875249	-0.508919	-0.239682	-0.629873	-0.430924	0.318028	0.0998228	-0.121975	0.338649	-1.25389	0.199455	-0.179687	0.166786	0.305692	-0.29414	0.210983	-0.0950662	-0.216093	0.273339	-0.110077	-0.142809	0.221166	-0.216484	0.170925	0.427176	0.344637	0.562876	0.116962	0.107222	-0.382637	-0.98074	-0.360444	0.499345	-0.411457	-0.091653	0.114957	0.100258
Dur-Test	0.166673	-0.340535	0.25563	0.139844	0.115945	-0.781653	0.301736	-0.572938	0.163303	0.339466	0.0149037	0.249366	-0.218068	-0.128062	0.0392878	-0.615985	-0.271555	0.0807148	-0.0860987	-0.332304	-0.0341653	-0.876323	-0.477726	0.0181448	-0.135403	-0.0224159	0.12352	0.0416413	0.0469337	-0.146344	-0.225621	-0.189344	0.216912	0.79607	0.187663	0.27847	-1.28253	-0.165783	0.183742	0.402842	0.00445997	-0.0990436	0.476755	0.00959507	0.104198	-0.0491605	-0.475127	0.486018	-0.0984977
BendAmp-Naive	0.356951	-0.272458	-0.0772778	-0.518283	0.0765333	-1.39945	-0.225293	-0.235228	0.367856	-0.404206	0.00385315	-0.368218	-0.056505	-0.226554	0.391697	1.35594	0.252419	-0.373536	0.266637	-0.399636	0.17591	0.145295	0.549176	-0.234079	-0.34057	0.379122	0.0338489	0.0336213	-0.887793	-0.198679	-0.0521647	-0.0485681	0.204183	-0.58456	0.153871	-0.0943758	-0.0810524	-0.585147	0.0186703	0.350069	0.00889566	-0.263409	-0.923825	-0.0893139	-0.845577	-0.373849	-0.0533614	-0.472785	-0.453089
BendAmp-Train	-0.617424	-0.356696	-0.70137	-0.602858	0.0193372	-0.155754	-0.531894	-0.756102	-0.357399	-0.813806	-0.49013	-0.633789	-0.606278	-0.174906	0.429872	0.996254	-0.730748	-1.1092	0.459181	-0.108367	-0.2993	0.878281	0.275254	-0.268641	-0.644206	0.423438	-0.513619	-0.495973	-1.20023	-0.0140073	-0.506389	0.363284	0.324951	0.470827	0.394442	0.42101	-0.0166005	-0.532213	-0.176902	-0.411332	-0.18033	-0.270522	0.360329	-0.30272	-0.503026	-0.580897	-0.0577247	-0.489601	-0.0667808
BendAmp-Test	-0.388641	-0.540982	-0.314917	-0.717587	-0.362829	-0.745512	-0.668632	-0.147597	-0.403571	-0.519024	-0.513413	-0.755216	-0.188084	-0.449728	0.417029	2.06673	-0.185913	-0.630987	-0.429293	-0.668205	-0.127469	-0.0193921	0.229201	-0.15809	-0.422124	0.12332	-0.498521	-0.400973	-0.365622	-0.592574	-0.374673	0.105992	0.323311	0.758501	0.095893	0.436187	0.500025	-0.732348	-0.369919	-0.374109	-0.376972	-0.289965	0.323501	-0.709411	-0.42888	-0.514438	-0.0227525	-0.679051	-0.303604
dOrient-Naive	0.427237	0.122864	-0.307949	-0.684514	-0.309394	-1.29177	-0.507319	0.0285232	0.239518	-0.119627	0.00648231	-0.00946879	-0.120012	-0.44116	-0.00718078	0.795285	0.0213413	-0.208034	-0.156701	-0.312467	0.134377	0.0763034	0.252926	0.094791	0.15364	0.88481	0.00637186	0.0340192	-1.19655	-0.327483	-0.210448	-0.991282	-0.170067	-0.627144	-0.310523	0.0823181	-0.395127	-0.360711	-0.364431	0.0497215	-0.17	-0.255317	-1.60195	0.533369	-0.154988	0.220011	-0.0435638	-0.183714	-0.0186161
dOrient-Train	0.447378	0.137661	-0.20866	-0.692709	0.507782	-1.45018	-0.15442	-0.0662707	0.187062	-0.00984847	0.128403	0.237679	-0.408011	0.620275	0.551969	-0.29368	-0.0608915	-0.16625	0.373551	0.309313	0.0779178	0.0486011	0.400754	0.243422	0.206312	0.161114	0.290354	0.178345	-0.141919	-0.0566508	0.107403	0.428525	0.653644	-0.177958	0.202581	0.27786	-1.05584	-1.15167	-0.266761	-0.463045	-0.400685	0.231049	-1.75953	0.253797	-0.148888	-0.226997	0.0699098	-0.113374	-0.0138194
dOrient-Test	-0.0296037	0.249803	-0.0836016	-0.377392	0.161437	-3.92299	-0.479469	0.142586	0.00125403	0.199844	-0.216904	-0.0701302	-0.0511268	0.152818	0.138973	4.22803	-0.532616	-0.152304	-0.0420409	-0.554392	0.160084	-0.816991	0.64642	0.080369	0.342099	0.079822	0.139231	0.0538549	0.404396	-0.386899	0.21946	-0.294879	0.34906	-0.575954	0.128833	0.0262182	-1.00416	-0.974981	-0.354263	-0.674225	-0.142593	0.0528518	-2.39762	-0.557393	-0.668732	-0.471734	0.316093	-0.0872979	-0.522846
SimpleOBend-Naive	-0.0326298	-0.161159	0.180482	-0.102488	0.0909265	-0.317347	-0.0374461	-0.370397	0.0480061	0.0270283	-0.476661	-0.0655693	-0.204184	0.26995	0.0333038	1.10164	-0.227322	-0.160103	0.464141	-0.130582	0.242617	-0.0759396	0.699187	-0.260935	0.482748	0.167378	0.0943203	0.227175	-0.286302	-0.170372	-0.044624	-0.109583	0.153772	-0.920119	0.0307169	0.269367	-0.52272	-0.210893	0.256489	0.193386	0.0760875	0.653645	-0.614671	0.138209	-0.2291	0.203602	-0.405536	-0.366684	-0.0684705
SimpleOBend-Train	-0.223601	-0.369309	-0.500498	-0.605312	-0.250135	0.08606	-0.210694	-0.409794	0.0472059	0.126795	0.0100178	0.0560481	-0.233789	0.164283	0.199798	0.983382	0.323956	-0.581278	0.385279	0.472757	-0.3922	2.75987	-0.387576	0.0310467	-0.094519	-0.215018	0.336493	-0.631304	-0.255698	-0.132201	-0.259828	0.262448	0.276232	-0.116897	0.440651	-0.0442631	-0.700997	-0.561404	-0.466235	-0.285236	-0.252353	0.177409	1.65915	0.133992	-0.0350208	-0.29465	0.143423	-0.0722927	-0.20419
SimpleOBend-Test	-0.514102	0.343122	-0.186897	-0.979229	-0.0483855	0.663582	-0.363533	0.0149567	-0.0165514	0.0749604	-0.207691	-0.270338	-0.170912	-0.00311604	-0.107713	3.92853	0.720435	-0.374808	-0.270995	0.469809	-0.195921	0.577947	0.411061	0.162889	0.137185	-0.0502016	-0.146022	-0.248318	0.140789	-0.328321	0.0954579	-0.00412969	-0.0920607	1.12339	0.369601	-0.289421	-0.764073	-1.27367	-0.336615	-0.251733	-0.31429	0.284075	0.507899	-0.340788	-0.0869939	-0.0512019	0.417704	-0.126402	-0.225973
C1Length-Naive	-0.235547	-0.109724	-0.166857	-0.657668	-0.410177	-0.121929	-0.299983	-0.0917991	-0.305472	-0.217249	-0.506139	-0.0869152	-0.186162	-0.350037	-0.043036	-0.12386	-0.0605842	-0.196056	-0.505572	-0.693414	0.0569657	-0.0413843	-0.808378	0.468049	0.102629	-0.431034	0.0110628	-0.20004	0.402769	0.18411	-0.0811398	0.22126	-4.17e-05	-0.711372	0.406639	-0.0372036	-0.188673	-0.681207	0.183505	0.148557	0.402738	-0.208904	-1.50912	-0.318108	0.216307	-0.251274	0.236053	0.0840584	0.320237
C1Length-Train	-0.351197	-0.420481	-1.13542	-0.49321	-0.0988581	1.31604	-0.665503	-0.541853	-0.462491	-0.397515	-0.342037	-0.573507	-0.907095	-0.116371	-0.135876	-0.0196324	-0.159844	-0.698236	0.224295	-0.275601	-0.363134	1.51765	-0.347862	-0.0601326	-0.280115	-0.574354	-0.245214	-0.708193	-0.34431	-0.286771	-0.393583	0.75158	0.350119	-0.0446719	0.269702	-0.0825089	-0.538874	-0.382258	-0.393301	-0.181556	0.138325	0.215992	1.48761	0.109472	0.359666	-0.159125	0.303624	0.396206	0.119141
C1Length-Test	-0.352759	0.334318	-0.521216	-0.472918	0.0053989	3.23991	-0.698793	-0.209112	-0.471179	-0.373402	-0.445102	-0.714354	-0.133434	0.123634	-0.520223	0.780646	0.541353	-0.376277	-0.305465	-0.0539394	0.200485	1.012	-0.102599	0.0944732	0.084533	-0.507412	-0.0324535	-0.57261	-0.277768	-0.239603	-0.0858752	0.614583	0.0967614	0.701653	-0.205576	0.461887	0.669075	0.0397063	-0.354222	0.233474	-0.441446	0.333153	2.50932	-0.226333	-0.0113274	0.490358	0.418787	0.765886	0.182757
C1AngVel-Naive	-0.0555721	0.282296	-0.273884	-0.0878561	0.0282226	-0.112941	0.173305	-0.385775	-0.140679	-0.197194	0.363708	-0.267164	0.0717513	0.010532	-0.311977	-0.0190398	-0.407012	-0.124072	-0.396443	-0.123947	-0.15404	-0.129108	0.53673	0.243315	-0.0643629	0.0177963	0.528887	0.562956	0.060274	-0.143879	0.0839932	0.375739	0.237253	-0.13848	0.23179	-0.333325	0.126344	0.0725007	0.289511	-0.348851	0.454125	-0.0665731	-0.780786	0.0762345	-0.383856	0.127195	-0.0507175	0.0465217	0.459081
C1AngVel-Train	0.423093	-0.274242	0.42874	0.516734	0.20272	-0.0353874	0.442461	-0.824103	-0.226333	-0.450792	0.100684	-0.200224	0.586569	0.376649	-0.132964	0.0515188	-0.650344	0.021161	-0.222851	0.0807068	0.658595	-0.0314465	0.283284	0.61987	0.156061	0.278033	0.00723734	0.302742	-0.171154	0.0993512	0.0323191	-0.0398195	0.203812	0.0162524	-0.346169	0.0906586	-0.296452	0.605691	0.549779	0.543886	0.693011	0.195036	-0.422835	-0.105631	-0.289304	0.108231	0.500152	-0.62011	0.410461
C1AngVel-Test	0.0782204	0.105699	0.427296	-0.0895563	0.821987	-0.388839	0.416669	-0.0143351	-0.077133	0.133314	-0.0765383	0.346937	-0.0271913	0.239598	0.399832	2.42683	-0.806857	0.106316	-0.196018	0.694625	0.330228	-0.244879	0.102179	0.495405	-0.0142229	0.181292	0.294254	0.235748	0.192798	0.269274	0.116765	-0.658042	-0.385018	-0.646666	0.0789178	-0.359409	-1.88458	-0.0240051	-0.141804	0.108052	0.162802	-0.0249326	1.93649	-0.221108	-0.534537	0.105875	0.138758	0.0994489	0.0535567
Prob-Tap	0.411974	0.454666	0.263482	0.227668	0.0497518	-0.0984683	0.302713	0.429416	0.197132	0.166164	-0.458621	-0.270919	0.0853483	0.43431	0.251887	-1.5548	-0.35485	-0.500925	0.234983	-0.236902	0.232954	0.0308817	0.236309	0.164014	-0.248398	-0.30362	-0.0932852	-0.35198	-0.589636	-0.298557	0.244966	0.471777	0.690094	-0.0205025	-0.10689	-0.111854	0.55367	0.351129	0.178859	0.782077	0.431565	0.0187001	0.0540205	-0.324222	-0.243902	-0.0308048	-0.384427	-0.0376998	0.0350493
TwoMvmt-Tap	0.0734899	-0.65358	-0.160551	-0.0638464	-0.418107	-1.76161	0.0264037	0.231926	0.262572	-0.0892308	-0.0768989	0.0338656	0.347784	-0.43955	0.0958531	-1.07553	-0.22561	-0.863851	-0.72962	-0.642399	-0.0774081	-0.792245	0.0217192	0.215736	0.490165	-0.35275	0.864376	-0.0610359	-0.594119	0.669991	-0.373175	-0.0355101	-0.230043	0.328949	0.0953405	0.157692	0.586482	0.3186	-0.150016	0.601246	0.0588369	-0.0467728	-0.564001	0.660685	-0.144882	0.390995	0.0155785	-0.737259	0.157396
Lat-Tap	-0.0775405	0.0861676	-0.0541246	0.0540872	-0.0450348	0.206975	-0.0810172	-0.129716	-0.319296	0.0357884	0.158291	-0.217824	-0.0232884	0.476145	-0.0559602	0.930625	-0.0919811	0.00824353	0.218996	-0.0163674	0.503141	0.344026	0.174758	-0.0769072	-0.317114	0.204863	0.347309	-0.0837613	-0.183367	0.223825	0.159193	0.119648	-0.111651	-0.139647	-0.390428	0.280365	-0.00167914	0.0111367	-0.370906	0.131671	0.0840194	0.112716	0.579931	-0.810076	0.339086	0.154392	0.37387	0.30921	0.306473
Disp-Tap	0.51073	0.512632	0.610458	0.972312	0.361082	0.414718	0.188928	0.216525	0.494992	0.626864	0.691662	0.610474	0.497078	0.302684	0.519816	-1.04691	0.773468	0.0647544	-0.357796	-0.131317	0.428301	0.634142	0.364319	0.600489	0.288471	0.413838	0.828953	0.579426	0.194801	0.267632	0.74278	0.182776	-0.181874	0.7302	-0.178868	0.361026	0.577472	0.478613	0.0858969	0.771503	0.238238	0.278256	0.98074	-0.416167	0.0672022	-0.194107	0.564554	0.230154	0.665707
Dur-Tap	0.0323175	0.190765	0.0300004	0.658703	-0.0863043	-0.339118	0.278136	-0.0528323	0.37039	0.15208	0.151947	-0.0212384	-0.367661	0.351707	0.250136	-0.492763	0.340546	0.123358	-0.0989915	0.513159	0.219785	0.0689902	0.0712815	0.740266	0.132307	0.177645	0.449969	-0.0592018	0.100397	0.0885409	0.315134	0.274922	0.227689	1.7952	0.346395	0.257559	0.04984	0.215388	0.436281	0.0508819	0.334364	0.190748	-0.0943139	0.468628	0.427925	0.283462	0.274817	0.431123	1.12729
BendAmp-Tap	-0.00538635	0.688556	0.977761	0.0641525	0.146291	-0.186447	0.131041	-0.0407024	0.249175	0.134468	0.00545618	0.497709	-0.030394	0.191502	0.299929	0.115004	0.443383	0.145059	-0.275632	0.416791	0.497663	0.430099	0.154695	0.587085	0.116943	-0.0724369	0.29522	0.168729	0.398053	0.509327	0.443843	-0.006039	0.719857	0.967327	0.331901	0.0653576	0.278886	0.315293	0.0349515	0.534921	0.148234	0.0986978	0.865878	-0.112117	0.0131607	-0.171832	0.227076	0.525205	0.893586
dOrient-Tap	0.260734	0.0670469	0.194267	0.441386	-0.0622636	0.183139	0.309368	0.213442	-0.0989722	-0.0415555	-0.101215	0.173461	0.067593	-0.116863	0.40149	-0.116977	0.532137	0.464786	-0.512449	-0.136103	0.388989	-0.636199	0.313346	0.672364	0.286686	0.14049	0.17147	-0.0693054	0.198297	0.0190552	0.194673	0.62125	0.0532481	0.792965	-0.00701131	0.244018	0.410363	0.262256	-0.0347521	0.479338	0.308092	-0.0871806	0.50177	-0.186695	0.0250948	-0.21661	-0.179782	0.077571	0.48443
SpntDisp-Train	-1.06016	-0.41998	-0.272679	0.552461	0.44236	0.00104364	-0.578195	-0.517623	0.14715	-0.143716	-0.188087	0.105011	-0.362367	-0.221489	-0.320085	-1.52496	-0.0529987	-0.69942	0.0998131	-0.874777	-0.0637643	0.622014	-0.757055	0.181318	-0.322334	-0.208411	-0.640041	-0.347346	-0.490906	-0.487731	-0.730926	-0.277332	-0.961576	-0.992478	0.296682	-0.577891	-0.465102	-0.347327	-0.620438	0.0879373	-0.103618	0.103591	1.52059	0.404329	-0.117758	-0.291031	0.204407	-0.277956	0.351356
SpntDisp-Test	0.153112	-0.624279	-0.00210561	-0.505801	-0.0450489	0.368041	-0.204937	-0.341849	-0.273625	-0.298531	-0.200676	0.172706	-0.310251	0.0326325	-0.837844	-1.71387	0.275129	-0.134643	-0.379596	-0.276761	-0.254169	0.0799508	-0.420411	0.195146	0.233364	0.324852	-0.37321	-0.287616	-0.278309	-0.411472	-0.294138	-0.18256	-0.675853	-0.426355	-0.0362562	0.0654157	-0.525638	-0.227819	-0.126808	0.770996	-0.604031	0.0316968	1.17227	0.506143	0.425871	0.398458	-0.153109	-0.117857	0.14933
SpntDisp-Free	0.0272541	-0.616763	-0.207855	-0.142176	0.176086	0.505776	-0.378289	-0.0588199	-0.0387563	-0.427872	0.00398879	0.0707877	0.224152	0.126365	-0.291422	-1.20396	0.177994	-0.264797	-0.231564	-0.330782	-0.229154	-0.0187388	0.0771063	-0.371899	-0.371045	0.155797	-0.533136	0.253816	-0.159583	-0.380556	-0.442057	-0.383173	-0.897489	-0.661975	-0.0216269	-0.367667	-0.650294	-0.204977	-0.0451377	0.330019	-0.323643	-0.0617526	0.628324	0.20579	0.00563525	-0.0609546	-0.0378373	0.35984	0.0915699
TurnBias-Free	1.02934	-0.259718	0.261452	0.167522	0.340317	-0.0347207	0.488947	0.351327	0.483228	0.185852	0.636686	0.728955	0.540047	0.702315	0.549252	0.310192	0.473201	0.381644	0.116617	-0.297443	0.340293	-0.42059	0.766866	0.271267	0.419308	0.706783	0.268945	0.641055	0.579208	-0.478077	0.0878934	0.0726365	-0.601807	-1.14273	0.494418	0.2774	-0.0103889	0.473098	0.257106	0.434395	-0.0730131	-0.0315328	0.907202	0.221516	0.540431	0.146096	-0.0250483	0.583177	0.454031
MedianTurnAng-Free	-0.132177	-0.177731	-0.217907	-0.0234662	-0.15319	-0.282906	-0.239654	-0.217889	-0.23241	-0.224393	-0.202484	-0.109521	-0.203696	-0.0753692	-0.1341	-0.732348	-0.105141	-0.123667	-0.00196101	-0.0956707	-0.0550069	-0.484178	-0.0759371	-0.234964	-0.204064	-0.164627	-0.101061	-0.226425	0.00840449	-0.0295223	-0.0225966	-0.213967	0.482563	1.01196	-0.211044	-0.124931	-0.197341	-0.275658	-0.421747	-0.294299	-0.038143	0.26348	0.588547	-0.122581	-0.450474	-0.393578	0.236846	-0.0651673	-0.339196
OMR-SpeedUp	-0.310076	0.324071	0.617956	0.209262	-0.217003	-0.93328	-0.111958	0.168605	-0.435219	-0.151254	-0.0139958	0.0596315	-0.438122	-0.474364	-0.412523	-1.47727	0.0169032	-0.652729	0.275007	0.411267	0.00965975	0.0449643	-0.142614	0.349692	-0.158071	-0.350802	-0.460449	-0.720034	-0.0691516	0.311408	-0.370909	0.321292	0.222909	-0.521889	0.127461	0.0314284	0.790139	0.0696788	0.0524692	-0.202162	-0.132925	-0.268652	-0.462766	-0.188295	-0.0628271	0.126246	0.0781287	-0.385004	-0.364612
OMR-SpeedDown	-0.860211	0.0570475	-0.0685219	-0.443702	-0.500165	0.523851	-0.354695	-0.380482	-0.151982	-0.024335	-0.0879781	-0.124779	-0.487171	-0.233149	-0.209828	-0.900288	-0.305742	-0.330249	-0.315684	0.632273	-0.287507	0.260181	-0.962343	0.0620395	0.152784	-0.546627	0.218965	-0.533598	-0.115842	0.0589477	0.146388	-0.137986	0.548018	0.713393	-0.199608	-0.162131	0.0879265	-0.120575	0.0275081	-0.338633	-0.33357	0.257138	0.595078	0.140189	-0.16813	-0.0826505	0.171666	-0.474914	-0.0959829
OMR-TurnBias	0.0814678	0.153927	0.334633	-0.101306	-0.114505	1.00857	0.0976057	0.180117	-0.0214608	0.184204	0.523288	1.03359	0.370638	0.486562	-0.152427	0.350402	0.504509	-0.329681	-0.118791	0.215874	0.0850673	0.508248	-0.139375	0.393071	0.170193	0.0389699	0.170429	-0.026948	0.0481204	-0.0236423	-0.0471393	0.0399472	0.193531	-0.245484	0.386392	-0.0138499	0.0498682	0.162566	0.215836	0.210388	-0.265429	0.116894	1.51027	0.567582	0.341947	0.578391	0.0925965	0.288591	0.272687
OMR-MedianTurnAng	0.267168	-0.438402	-0.360851	-0.0906995	-0.14172	-0.524398	-0.297135	-0.275877	-0.595506	-0.0578499	-0.39353	-0.29011	-0.173531	-0.121706	0.447311	0.615903	-0.259137	-0.357561	-0.35828	-0.716156	-0.133113	-0.949451	-0.346582	-0.201486	-0.270306	-0.392582	-0.205295	-0.646339	-0.0935518	0.0225608	-0.395831	-0.0404176	0.316262	0.676355	-0.355647	0.0151705	0.226123	-0.213747	-0.330285	-0.230811	0.0181066	-0.0196288	0.345982	-0.224898	-0.187479	-0.0362627	-0.265244	-0.0956006	-0.0917552
OMR-Perf	-0.205861	0.094179	-0.159367	-0.661719	-0.651571	-1.29923	-0.151714	-0.470615	0.316667	0.187643	0.35214	1.55889	1.14621	0.34165	0.299994	-0.885935	-0.405898	-0.536441	-0.0013449	0.154755	-0.139434	-0.325652	-0.410309	0.142822	0.012863	-0.139057	-0.267451	0.0191439	0.163778	-0.400418	0.115638	-0.485478	0.134367	-0.948502	-0.550755	-0.268199	-0.853888	-0.214501	0.289536	-0.717242	-0.916964	0.198548	-1.19285	0.959659	0.407792	0.0352332	-0.354632	-0.195572	0.627324
[truncated: 1,712 more columns]
